# Supplementary material for: Transcriptomic and Functional Evidence for Differential Effects of MCF-7 Breast Cancer Cell-Secretome on Vascular and Lymphatic Endothelial Cell Growth
Source: MDPI journal article supplement (doi:10.3390/ijms23137192), 2022-06-28
Supplement: s1 [file s1]

*Article*

# **Transcriptomic and Functional Evidence for Differential Effects of MCF-7 Breast Cancer Cell-Secretome on Vascular and Lymphatic Endothelial Cell Growth**

**Giovanna Azzarito <sup>1</sup>, Michele Visentin <sup>2</sup>, Brigitte Leeners <sup>1</sup>, and Raghvendra K. Dubey <sup>1, 3</sup>**

<sup>1</sup> Department of Reproductive Endocrinology, University Hospital Zurich, 8952 Schlieren, CH;

[giovanna.azzarito@usz.ch](mailto:giovanna.azzarito@usz.ch) , [Brigitte.leeners@usz.ch](mailto:Brigitte.leeners@usz.ch) , [raghvendra.dubey@usz.ch](mailto:raghvendra.dubey@usz.ch)

<sup>2</sup> Department of Clinical Pharmacology and Toxicology, University Hospital Zurich, University of Zurich, Zurich, Switzerland; [Michele.Visentin@usz.ch](mailto:Michele.Visentin@usz.ch)

<sup>3</sup> Department of Pharmacology & Chemical Biology, University of Pittsburgh, Pittsburgh, PA 15219, USA

## Supplementary data S1

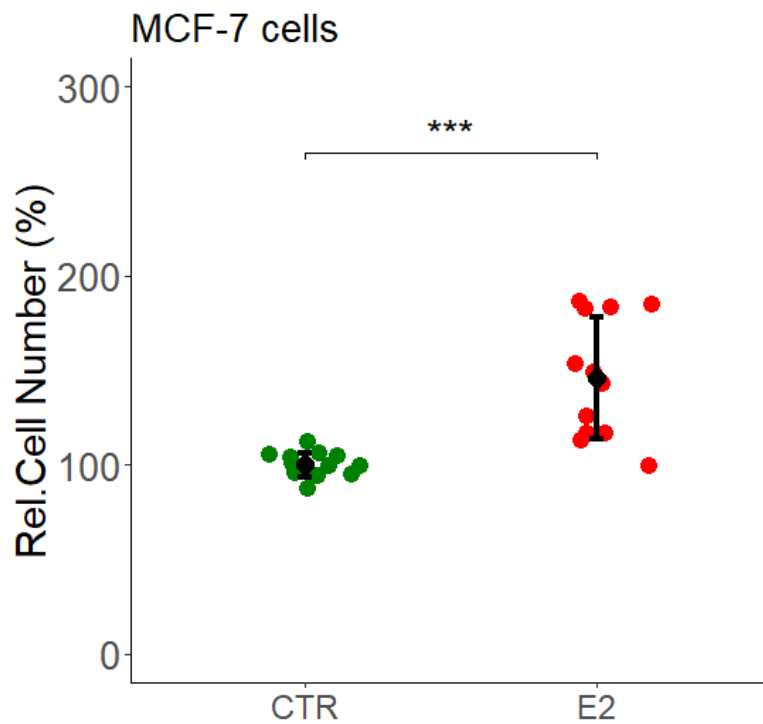

**Figure S1: Depicting the proliferative actions of estradiol (10nM) on MCF-7 breast cancer epithelial cells.** Experiments were performed at least 3 times in triplicates or quadruplicates and the data represent mean  $\pm$  SD.  $p < 0.01^{***}$ , compared to the respective control.
