# Supplementary material for: Transcriptomic and Functional Evidence for Differential Effects of MCF-7 Breast Cancer Cell-Secretome on Vascular and Lymphatic Endothelial Cell Growth
Source: Int J Mol Sci. 2022 Jun 28;23(13):7192. doi: 10.3390/ijms23137192 (PMC9266834; doi:10.3390/ijms23137192)
Supplement: Supplementary file 1 [file ijms-23-07192-s001.zip › Table S1.xlsx]

## Sheet: BioPlanet
Term	Overlap	P-value	Adjusted P-value	Old P-value	Old Adjusted P-value	Odds Ratio	Combined Score	Genes
Translation	117/151	6.1196e-33	9.03252e-30	0	0	8.01921	594.815	EIF4A2;EIF4A1;RPL5;RPL30;RPL3;RPL32;RPL31;RPL34;RPL10A;RPL8;SRP14;RPL9;RPL6;RPL7;EEF1B2;RPS15;RPS17;RPS16;RPL18A;RPS19;RPL36AL;RPS18;RPL35;RPL38;RPL37;RPS10;RPS13;RPS12;RPS9;RPL21;RPS7;RPS8;RPL23;RPL22;RPS6;RPSA;RPL24;RPL27;RPL26;RPL29;RPL28;UBA52;RPN2;MRPL13;SSR1;EIF2B4;EIF2B3;RPL41;EIF2B2;EEF2;EIF2S2;RPS26;RPS25;RPS28;EIF2S3;EIF5;RPS27;RPS29;RPL27A;RPS20;RPS21;RSL24D1;RPS24;RPS23;RPLP1;RPLP0;SR…
Influenza infection	109/142	3.87527e-30	2.85995e-27	0	0	7.68752	520.621	RPL5;RPL30;NUP107;RPL3;NUP188;RPL32;RPL31;RPL34;RPL10A;RPL8;RPL9;RPL6;IPO5;RPL7;RPS15;RPS17;RPS16;RPL18A;RPS19;RPS18;RPL35;RPL38;RPL37;RPS10;RPS13;KPNA1;RPS12;RPS9;RPL21;RPS7;RPS8;RPL23;RPL22;RPS6;RPSA;NUP93;RPL24;RPL27;NUP98;RPL26;RPL29;RPL28;UBA52;NUP205;POM121;SEH1L;NUP160;NUP85;TPR;NUP88;RPL41;NUP155;EIF2AK2;NUP153;RPS26;RPS25;RPS28;RPS27;RPS29;RPL27A;RPS20;RPS21;RPS24;RPS23;RPLP1;CLTC;RPLP0;…
Protein metabolism	245/442	2.02771e-28	9.97635e-26	0	0	2.92702	186.643	EIF4A2;RPL5;EIF4A1;RPL30;PGAP1;RPL3;RPL32;RPL31;RPL34;RPL8;RPL9;RPL6;ACTB;RPL7;RPS15;C1GALT1C1;RPS17;RPS16;STS;RPL18A;RPS19;RPS18;RPL35;LONP2;RPL38;RPL37;RPS10;RPS13;RPS12;ST6GAL1;RPL21;MUCL1;RPL23;RPL22;ALG5;ALG2;ALG3;MOGS;ALG1;BCS1L;RPL24;RPL27;PREB;VDAC1;RPL26;RPL29;RPL28;UBA52;RPN2;SAR1B;ATP5B;SSR1;ST8SIA6;ST3GAL1;SEC31A;EDEM3;RPL41;EDEM2;PMM2;CS;CCT6A;RPS26;RPS25;RPS28;EIF5;RPS27;RPS29;RPL27…
Cytoplasmic ribosomal proteins	87/108	4.72691e-27	1.74423e-24	0	0	9.61503	582.829	RPL5;RPL30;RPL3;RPL32;RPL31;RPL34;RPLP1;RPLP0;RPL10A;RPL8;RPL9;RPL6;RPL7;RPS15;RPS4X;RPL7A;RPS17;RPS16;RPL18A;RPS19;RPS18;RPS6KA1;RPL35;RPLP2;RPL38;RPL37;RPS10;RPS13;RPS12;RPS9;RPL21;RPL36A-HNRNPH2;RPS7;RPS8;RPL23;RPL22;RPS6;RPL13A;RPL9P7;RPSA;RPS3A;DNAJC3;RPL37A;RPL24;RPL27;RPL26;RPL29;RPL28;UBA52;RPL10;RPL12;MRPL19;RPL11;RPL36A;RPS15A;RPL14;RPL13;RPL15;RPS2;RPL18;RPS27A;RPL17;RPL19;RPL41;RPL23A…
Respiratory electron transport, ATP biosynthesis by chemiosmotic coupling, and heat production by uncoupling proteins	69/81	1.57799e-24	4.65822e-22	0	0	13.3136	729.665	COX7B;NDUFA11;NDUFA12;COX4I1;NDUFA10;ATP5C1;ETFB;COX6A1;ATP5G1;COX7C;UQCRFS1;COX8A;NDUFC2;NDUFC1;SDHD;ATP5F1;SDHB;ATP5J2;COX6B1;COX7A2L;NDUFS8;NDUFS7;NDUFS6;NDUFS5;NDUFS4;UQCRC1;NDUFS2;UQCRC2;NDUFB9;NDUFB8;NDUFB7;NDUFB10;NDUFB6;UQCRB;NDUFB11;NDUFB5;NDUFB4;ATP5A1;NDUFB3;ETFDH;NDUFB2;ATP5J;NDUFB1;UQCR11;ATP5H;UQCR10;ATP5O;COX5B;COX5A;UQCRH;ATP5L;ATP5B;ATP5E;ATP5D;CYC1;NDUFV3;NDUFV2;NDUFV1;NDUFA9;ND…
Disease	328/674	4.15888e-24	1.02308e-21	0	0	2.23877	120.528	RPL5;APP;RPL30;NUP107;RPL3;RPL32;RPL31;RPL34;RPL8;RPL9;RPL6;ACTB;RPL7;PSMD8;RPS15;PSMD9;PSMD6;RPS17;PSMD7;RPS16;PSMD4;RPL18A;RPS19;PSMD5;PPP2R1A;RPS18;AKT3;FGFR1OP2;PSMD3;AP1S2;AP1S1;RPL35;RPL38;RPL37;ATP6V1E1;B2M;RPS10;RPS13;RPS12;SKP1;TSPYL2;ATP6V1G1;ATP6V0E1;RPL21;DDX11;RPL23;RPL22;AP1B1;FRS2;HLA-A;NUP93;HIST2H3A;PRKAR1A;CDC37;PSME1;RPL24;RPL27;PREB;NUP98;RPL26;KDELR3;RPL29;TLN1;RPL28;UBA52;VP…
Tricarboxylic acid (TCA) cycle and respiratory electron transport	87/117	1.14055e-22	2.40494e-20	0	0	6.72616	339.842	COX7B;NDUFA11;NDUFA12;COX4I1;NDUFA10;ATP5C1;ETFB;COX6A1;ATP5G1;COX7C;PDK3;UQCRFS1;SLC16A3;PDK2;COX8A;NDUFC2;NDUFC1;SDHD;ATP5F1;SDHB;ATP5J2;COX6B1;COX7A2L;NDUFS8;NDUFS7;NDUFS6;NDUFS5;NDUFS4;UQCRC1;NDUFS2;SUCLG1;UQCRC2;L2HGDH;DLD;NDUFB9;FH;NDUFB8;NDUFB7;NDUFB10;UQCRB;NDUFB6;NDUFB11;NDUFB5;NDUFB4;ATP5A1;NDUFB3;ETFDH;NDUFB2;ATP5J;NDUFB1;UQCR11;ATP5H;PDHB;UQCR10;ATP5O;COX5B;COX5A;UQCRH;ATP5L;ATP5B;ATP…
Influenza viral RNA transcription and replication	91/125	1.50914e-22	2.78437e-20	0	0	6.21007	312.027	RPL5;RPL30;SMG1;RPL3;RPL32;RPL31;RPL34;RPLP1;RPLP0;PPP2R2A;SMG9;RPL10A;RPL8;RPL9;RPL6;IPO5;RPL7;RPS15;RPS4X;RPL7A;RPS17;RPS16;RPL18A;RPS19;PPP2R1A;RPS18;MAGOH;RPL35;RPLP2;RPL38;RPL37;RPS10;RPS13;RPS12;UPF1;RPS9;RPL21;RPS7;RPS8;RPL23;RPL22;RPS6;RPL13A;RPSA;RPS3A;DNAJC3;RPL37A;RPL24;RPL27;ETF1;RPL26;PABPC1;RPL29;RPL28;UBA52;RBM8A;RPL10;RPL12;RPL11;RPL36A;RPS15A;POLR2C;POLR2D;RPL14;RPL13;POLR2H;RPL1…
Cap-dependent translation initiation	60/73	6.59987e-20	1.08238e-17	0	0	10.6698	471.227	EIF4A2;EIF4A1;RPL5;RPL30;RPL3;RPL32;RPL31;RPL34;RPLP1;RPLP0;RPL10A;RPL8;RPL9;RPL6;RPL7;RPL7A;RPL18A;RPL35;RPLP2;RPL38;RPL37;EIF5B;RPL21;RPL23;RPL22;RPL13A;RPL37A;RPL24;RPL27;PABPC1;RPL26;RPL29;RPL28;UBA52;RPL10;RPL12;RPL11;RPL36A;RPL14;RPL13;RPL15;RPL18;RPL17;RPL19;RPL41;RPL23A;EIF2S2;EIF2S3;EIF5;EIF3K;EIF3I;RPL27A;EIF3J;EIF3G;EIF3H;EIF3E;EIF3F;EIF3C;EIF3A;RPL26L1
Gene expression	424/968	1.21171e-19	1.78849e-17	0	0	1.84464	80.3471	RPL5;RPL30;ZNF175;NUP107;RPL3;MAML2;RPL32;MAML1;RPL31;RPL34;SERPINE1;HNRNPU;HNRNPR;PHAX;EPRS;RPL8;RPL9;RPL6;RPL7;LSM10;PSMD8;PSMD9;PSMD6;PSMD7;PSMD4;PSMD5;CLP1;PSMD3;RPL35;RPL38;RPL37;MED1;RPL21;RPL23;ZNF160;RPL22;ZNF12;MED6;WDR77;NUP93;LARS2;PSME1;RPL24;RPL27;NUP98;RPL26;RPL29;RPL28;UBA52;ZNF398;ZNF28;SLBP;ZNF274;NUP205;POM121;SET;SEH1L;ZNF394;RPN2;NUP85;SSR1;NUP88;NRBF2;ZNF268;ZNF267;ZNF266;NR2…
Electron transport chain	76/105	8.12931e-19	1.09081e-16	0	0	6.06763	252.739	COX7B;NDUFA12;COX4I1;NDUFA10;ATP5C1;ATP5G3;COX6A1;ATP5G2;NDUFC2-KCTD14;ATP5G1;COX7C;UQCRFS1;COX8A;NDUFC2;NDUFC1;SDHD;ATP5F1;SDHB;ATP5J2;COX6B1;COX7A2L;NDUFS8;NDUFS7;NDUFS6;NDUFS5;NDUFS4;UQCRC1;NDUFS2;UQCRC2;ND3;SLC25A5;SLC25A4;SLC25A6;ND6;NDUFB9;NDUFB8;NDUFB7;NDUFB10;UQCRB;NDUFB6;NDUFB5;NDUFB4;COX17;ATP5A1;NDUFB3;NDUFB2;ATP5J;NDUFB1;COX7A2;UQCR11;ATP5H;UQCR10;ATP5O;COX5B;COX7A1;COX5A;UQCRH;ATP5L;…
Parkinson's disease	87/131	1.74228e-17	2.143e-15	0	0	4.5814	176.79	COX7B;COX4I1;NDUFA10;ATP5C1;UBE2L6;PARK7;ATP5G3;COX6A1;ATP5G2;ATP5G1;COX7C;PARK2;CASP9;UCHL1;CASP3;UQCRFS1;COX8A;NDUFC2;NDUFC1;SDHD;ATP5F1;SDHB;COX6B1;COX7A2L;NDUFS8;NDUFS7;NDUFS6;NDUFS5;NDUFS4;UQCRC1;VDAC3;VDAC2;NDUFS2;VDAC1;UQCRC2;ND3;SLC25A5;SLC25A4;PPID;SLC25A6;ND6;NDUFB9;NDUFB8;NDUFB7;NDUFB10;UBA7;UQCRB;NDUFB6;NDUFB5;NDUFB4;ATP5A1;NDUFB3;NDUFB2;ATP5J;HTRA2;NDUFB1;COX7A2;UQCR11;ATP5H;UQCR10;A…
Cell cycle	222/453	3.97738e-17	4.51586e-15	0	0	2.2474	84.8694	RB1;NUP107;CCP110;PPP2R2A;SMC3;PSMD8;CDC20;PSMD9;PSMD6;PSMD7;CDC23;PSMD4;PPP2R1B;PSMD5;PPP2R1A;CDC26;PSMD3;CDC27;CHEK1;SKP2;SKP1;TINF2;CSNK1E;AKAP9;PSME1;NUP98;KIF20A;UBA52;ANAPC13;SEH1L;PRKDC;CDCA8;ANAPC10;NUP85;PLK4;CREBBP;GADD45B;GADD45A;RCC2;PLK1;SMARCA5;GADD45G;STAG1;RPS27;STAG2;CDC16;ATM;CEP57;HIST2H2AA3;TOP2A;CDKN1A;FEN1;CETN2;RSF1;ACTR1A;PCM1;TUBA1A;XPO1;MIS18BP1;NUF2;TK2;NDEL1;SEC13;TUBB…
Oxidative phosphorylation	86/136	2.29681e-15	2.4215e-13	0	0	3.9829	134.253	COX7B;NDUFA11;COX4I1;NDUFA10;ATP5C1;ATP5G3;TCIRG1;ATP12A;COX6A1;ATP5G2;NDUFC2-KCTD14;ATP5G1;COX7C;UQCRFS1;ATP6V1E1;COX8A;ATP6V1G1;ATP6V0B;ATP6V0E1;ATP6AP1;ATP6AP2;NDUFC2;NDUFC1;SDHD;ATP5F1;SDHB;ATP5J2;COX6B1;COX7A2L;NDUFS8;NDUFS7;NDUFS6;NDUFS5;NDUFS4;UQCRC1;NDUFS2;UQCRC2;ND3;ATP6V1A;ND6;NDUFB9;NDUFB8;NDUFB7;NDUFB10;UQCRB;NDUFB6;NDUFB5;NDUFB4;COX17;ATP5A1;NDUFB3;NDUFB2;ATP5J;NDUFB1;COX7A2;UQCR11;A…
Proteasome degradation	49/63	1.07511e-14	1.0579e-12	0	0	8.0759	259.751	PSMD8;PSMD9;PSMD6;UCHL1;PSMD7;PSMD4;PSMD5;PSMD3;HIST1H2AE;HIST1H2AB;H2AFZ;H2AFX;HLA-B;HLA-A;HLA-F;HLA-G;HLA-E;PSMA6;PSMA4;IFNG;PSMA1;PSMA2;PSME1;PSMD10;PSMD12;PSMD11;RPN2;UBA7;PSMD13;PSMB10;PSMB6;PSMB7;PSMB4;PSMB5;PSMB2;UBB;PSMB3;PSMB1;UBC;UBE2B;PSMB8;PSMB9;PSMC5;PSMC6;PSMC4;NEDD4;PSMC1;PSMC2;UBA1
DNA replication	116/207	1.2848e-14	1.18523e-12	0	0	2.95789	94.61	RB1;NUP107;ZWILCH;GMNN;SMC3;CDC20;PSMD8;PSMD9;PSMD6;PSMD7;PPP2R1B;PSMD4;PPP2R1A;PSMD5;PSMD3;CLIP1;PSME1;KIF20A;NUP98;UBA52;PSMD10;RNASEH2C;PSMD12;SEH1L;PSMD11;RNASEH2A;PSMD14;PSMD13;CDCA8;PMF1;NUP160;UBB;NUP85;ORC2;UBC;RCC2;PLK1;NDC80;STAG1;KIF18A;RPS27;STAG2;CDKN1A;FEN1;MCM7;XPO1;PPP2R5E;NUF2;POLE;NDEL1;RFC5;SEC13;RFC4;RFC1;KIF23;SMC1A;CKAP5;CCNA2;PSMA6;CCNA1;PSMA4;KIF2A;PSMA1;PSMA2;GORASP1;MCM3…
HIV factor interactions with host	81/128	1.3967e-14	1.21267e-12	0	0	3.98832	127.236	NUP107;CCNT1;NUP188;PSIP1;PSMD8;PSMD9;PSMD6;PSMD7;XPO1;PSMD4;PSMD5;PSMD3;AP1S2;AP1S1;BANF1;RAC1;B2M;KPNA1;SKP1;AP1B1;HLA-A;RBX1;NUP93;PSMA6;PSMA4;PSMA1;PSMA2;NUP50;PSME1;NUP54;NUP98;SLC25A5;PPIA;UBA52;SLC25A4;SLC25A6;PSMD10;NUP205;POM121;PSMD12;PSMD11;SEH1L;CUL5;PSMD14;PSMD13;NUP160;PSMB10;PSMB6;PSMB7;PSMB4;PSMB5;UBB;PSMB2;NUP85;PSMB3;TPR;UBC;PSMB1;TCEB2;NUP88;TCEB1;RPS27A;PAK2;RAE1;AP1M1;RANBP2;…
Alzheimer's disease	99/169	2.4749e-14	2.02942e-12	0	0	3.27737	102.68	APP;NDUFA10;ATP5C1;COX6A1;TNF;CHP1;CAPN1;SDHD;SDHB;COX6B1;ADAM17;COX7A2L;UQCRC1;UQCRC2;NDUFB10;UQCRB;ATP5J;ITPR2;COX7A2;ITPR3;ATP5H;PSEN1;ATP5O;COX7A1;UQCRH;APH1A;ATP5B;PPP3R1;ATP5E;ATP5D;COX2;CYC1;FADD;NAE1;NDUFV3;NDUFV2;NDUFV1;EIF2AK3;CDK5;UQCRQ;GNAQ;CYCS;CALM1;GSK3B;COX7B;COX4I1;ATP2A3;ATP2A2;ATP5G3;ATP5G2;ATP5G1;COX7C;CASP9;PPP3CA;CASP12;CASP3;UQCRFS1;COX8A;PSENEN;NDUFC2;NDUFC1;ATP5F1;TNFRSF1…
Huntington's disease	105/184	4.56286e-14	3.54462e-12	0	0	3.08109	94.6456	NDUFA10;ATP5C1;COX6A1;EP300;TGM2;SDHD;SDHB;COX6B1;COX7A2L;UQCRC1;VDAC3;VDAC2;VDAC1;UQCRC2;PPID;NDUFB10;UQCRB;ATP5J;COX7A2;ATP5H;ATP5O;COX7A1;UQCRH;ATP5B;ATP5E;ATP5D;COX2;CYC1;NDUFV3;NDUFV2;NDUFV1;CREBBP;DLG4;UQCRQ;GNAQ;CYCS;DNAL1;RCOR1;COX7B;COX4I1;CLTC;ATP5G3;ATP5G2;ATP5G1;COX7C;GRM1;CASP9;CASP3;UQCRFS1;COX8A;GPX1;NDUFC2;NDUFC1;ATP5F1;CREB3;NDUFS8;NDUFS7;NDUFS6;NDUFS5;NDUFS4;NDUFS2;PPARG;PLCB1;S…
APC/C-mediated degradation of cell cycle proteins	57/82	3.12279e-13	2.30462e-11	0	0	5.26369	151.567	CDC20;PSMD8;PSMD9;PSMD6;CDC23;PSMD7;PSMD4;PTTG1;PSMD5;CDC26;CDC27;PSMD3;SKP2;SKP1;CCNA2;CCNA1;PSMA6;PSMA4;PSMA1;PSMA2;PSME1;UBA52;PSMD10;PSMD12;PSMD11;PSMD14;PSMD13;CUL1;ANAPC10;AURKB;PSMB10;AURKA;PSMB6;PSMB7;CCNB1;FZR1;PSMB4;PSMB5;PSMB2;UBB;PSMB3;PSMB1;UBC;BUB3;RPS27A;UBE2C;PLK1;PSMB8;PSMB9;PSMC5;PSMC6;PSMC4;PSMC1;CDC16;PSMC2;CDK1;MAD2L1
HIV infection	109/200	9.40958e-13	6.61359e-11	0	0	2.77614	76.8765	NUP107;CCNT2;CCNT1;NUP188;GTF2B;PSMD8;PSMD9;PSMD6;PSMD7;PSMD4;PSMD5;PSMD3;AP1S2;AP1S1;BANF1;B2M;SKP1;KPNA1;AP1B1;HLA-A;RBX1;NUP93;PSME1;NUP98;UBA52;PPIA;VPS28;PSMD10;NUP205;POM121;PSMD12;SEH1L;PSMD11;CUL5;PSMD14;PSMD13;SUPT4H1;GTF2E2;NUP160;UBB;NUP85;TPR;UBC;NUP88;AP1M1;NUP155;XRCC5;NUP153;SUPT5H;NMT2;FEN1;PSIP1;XPO1;RAC1;NELFE;VPS37B;PSMA6;PSMA4;PSMA1;PSMA2;NUP50;NUP54;SLC25A5;SLC25A4;SLC25A6;GT…
Destabilization of mRNA by AUF1 (hnRNP D0)	48/66	1.6107e-12	1.08063e-10	0	0	6.15027	167.007	PSMD10;PSMD12;PSMD11;CUL5;PSMD14;PSMD13;HSPB1;PSMB10;MRC2;PSMD8;PSMB6;PSMD9;PSMB7;PSMD6;PSMB4;PSMD7;PSMB5;CCND1;PSMD4;PSMB2;UBB;PSMD5;PSMB3;PSMD3;PSMB1;UBC;TCEB2;TCEB1;RPS27A;HSPA8;PSMB8;RBX1;PSMB9;PSMA6;PSMC5;PSMA4;PSMC6;PSMA1;PSMA2;CDK4;PSMC4;PSMC1;PSMC2;PSME1;HNRNPD;PABPC1;UBA52;HSPA1A
Activation of mRNA upon binding of the cap-binding complex and eIFs, and subsequent binding to 43S	43/57	2.94379e-12	1.88915e-10	0	0	7.07996	187.982	EIF4A2;EIF4A1;RPS15;RPS4X;RPS17;RPS16;RPS15A;RPS19;RPS18;RPS2;RPS27A;RPS10;RPS13;RPS12;RPS9;RPS7;RPS8;RPS6;RPS3A;RPSA;EIF2S2;RPS26;RPS25;RPS28;EIF2S3;EIF5;RPS27;EIF3K;RPS29;EIF3I;EIF3J;EIF3G;EIF3H;EIF3E;RPS20;PABPC1;EIF3F;FAU;EIF3C;RPS21;EIF3A;RPS24;RPS23
Ubiquitin-mediated degradation of phosphorylated Cdc25A	46/64	9.32994e-12	5.73791e-10	0	0	5.89206	149.645	PSMD10;PSMD12;PSMD11;PSMD14;PSMD13;ODC1;CUL1;OAZ1;OAZ2;PSMB10;CKS1B;PSMD8;PSMB6;PSMD9;PSMB7;PSMD6;FZR1;PSMB4;PSMD7;PSMB5;PSMD4;PSMB2;UBB;PSMD5;PSMB3;CHEK1;PSMD3;PSMB1;UBC;RPS27A;SKP1;NQO1;PSMB8;PSMB9;PSMA6;PSMC5;PSMA4;PSMC6;PSMA1;PSMA2;PSMC4;PSMC1;PSMC2;PSME1;ATM;UBA52
Antigen processing: cross presentation	52/79	8.44704e-11	4.98713e-09	0	0	4.44194	103.029	CTSS;MRC2;PSMD8;PSMD9;PSMD6;PSMD7;PSMD4;PSMD5;SEC61G;PSMD3;ITGAV;SEC61B;B2M;PDIA3;HLA-B;TAP2;CYBA;HLA-A;HLA-F;HLA-G;HLA-E;TAPBP;PSMA6;PSMA4;PSMA1;PSMA2;PSME1;UBA52;PSMD10;PSMD12;PSMD11;PSMD14;PSMD13;PSMB10;PSMB6;PSMB7;PSMB4;PSMB5;PSMB2;UBB;PSMB3;PSMB1;UBC;RPS27A;LNPEP;PSMB8;PSMB9;PSMC5;PSMC6;PSMC4;PSMC1;PSMC2
T cell receptor regulation of apoptosis	255/603	2.28295e-10	1.25465e-08	0	0	1.70855	37.9305	RB1;IFITM3;IFITM1;ATP5C1;NUDT2;ENO1;F11R;RPL6;CDC20;LGALS1;PNP;NAMPT;RPL37;CEP97;ATP6V1E1;IER2;IER3;RPL23;IFRD2;AP1B1;HLA-B;MIF;HLA-G;CH25H;RNF126;PSME1;VDAC1;LAP3;RPL28;ATF4;ABCB1;COPS7B;MGST2;OAZ1;SLC5A3;MRPL11;PRDX2;PRDX4;PRDX1;ATP5D;TP53BP2;S100A10;CCR1;PLK3;TRAP1;CREBBP;JUN;RPL41;JUND;NDFIP1;GADD45B;MTHFR;CS;RPS29;PKIA;GOLGB1;REL;GTF2IRD1;ATM;RPS20;GRAP;ADA;TMEM9B;RPS24;HIST2H2AA3;TOP2A;CDKN…
Cyclin A-Cdk2-associated events at S phase entry	48/72	2.2951e-10	1.25465e-08	0	0	4.61071	102.335	RB1;PSMD10;CDKN1A;PSMD12;PSMD11;PSMD14;PSMD13;CUL1;PSMB10;CKS1B;PSMD8;PSMB6;PSMD9;PSMB7;PSMD6;FZR1;PSMB4;PSMD7;PSMB5;CCND1;PSMD4;PSMB2;UBB;PSMD5;PSMB3;PSMD3;PSMB1;UBC;SKP2;RPS27A;SKP1;PSMB8;PSMB9;CCNA2;CCNA1;PSMA6;PSMC5;PSMA4;PSMC6;PSMA1;CCNE1;PSMA2;CDK4;PSMC4;PSMC1;PSMC2;PSME1;UBA52
Antiviral mechanism by interferon-stimulated genes	47/70	2.43689e-10	1.28459e-08	0	0	4.71051	104.268	EIF4A2;EIF4A1;NUP205;POM121;NUP107;SEH1L;NUP188;UBA7;UBE2L6;IFIT1;USP18;NUP160;UBB;NUP85;TPR;UBC;TRIM25;KPNA4;NUP88;ARIH1;KPNA5;KPNA2;RPS27A;RAE1;KPNA1;RANBP2;NUP155;DDX58;STAT1;MX2;MX1;EIF2AK2;ISG15;NUP153;NUP93;PPM1B;NUP50;NEDD4;NUP35;PIN1;NUP54;NUP98;NUPL2;UBA52;EIF4G3;EIF4G2;NUP37
Metabolism	600/1615	7.71991e-10	3.92917e-08	0	0	1.39316	29.2314	NUP107;PGAP1;UXS1;ATP5C1;XYLT1;ENO1;EPRS;NDST1;SCP2;NAMPT;PIP4K2A;MED1;SDS;GLCE;CEL;MED6;NUP93;CH25H;MTHFD2;ETHE1;HMBS;UQCRC1;FAR1;NUP98;UQCRC2;HPRT1;IDO2;MTMR1;NUP205;TPH1;MTMR2;ABCB1;MTMR3;RPN2;IQGAP1;MTMR4;OAZ1;ADH5;MTMR6;OAZ2;CYB5R3;RDH11;NUP85;CHST12;AFMID;PLCG2;COX2;NUP88;PIP5K1C;ST3GAL1;FDFT1;GSTM4;B3GALNT1;CREBBP;CDK19;GSTM1;CHKB;PMM2;EPT1;MTHFR;MCAT;PRDX6;CS;SQLE;CYP2C9;GLUD2;QARS;ADI1;P…
Downstream signaling events Of B cell receptor (BCR)	59/98	9.19616e-10	4.52451e-08	0	0	3.4902	72.6207	GSK3B;CDKN1A;GSK3A;PTEN;PSMD8;CASP9;IKBKB;PSMD9;PSMD6;PSMD7;PSMD4;PSMD5;AKT3;PSMD3;MLST8;MAP3K7;HRAS;SKP1;PDPK1;PSMA6;PSMA4;PSMA1;PSMA2;PSME1;UBA52;PSMD10;PSMD12;PSMD11;PHLPP1;PSMD14;PSMD13;CUL1;BCL10;PSMB10;RELA;PSMB6;PSMB7;PSMB4;PSMB5;UBB;PSMB2;PSMB3;UBC;PSMB1;RICTOR;RPS27A;BAD;MTOR;PSMB8;PSMB9;NFKBIA;PSMC5;PSMC6;PSMC4;PSMC1;PSMC2;MDM2;REL;KRAS
S phase	65/112	1.13715e-09	5.41431e-08	0	0	3.19198	65.7381	RB1;CDKN1A;FEN1;MCM7;CKS1B;PSMD8;PSMD9;PSMD6;PSMD7;CCND1;PSMD4;PSMD5;PSMD3;SKP2;POLE;SKP1;RFC5;RFC4;RFC1;CCNA2;CCNA1;PSMA6;PSMA4;PSMA1;CCNE1;PSMA2;PSME1;MCM3;MCM4;MCM5;UBA52;PSMD10;PSMD12;PSMD11;PCNA;PSMD14;PSMD13;PRIM1;CUL1;PSMB10;PSMB6;POLD4;PSMB7;FZR1;PSMB4;CDC45;PSMB5;UBB;PSMB2;PSMB3;ORC2;UBC;POLD2;PSMB1;RPS27A;GINS2;PSMB8;PSMB9;PSMC5;PSMC6;CDK4;PSMC4;PSMC1;RPA3;PSMC2
mRNA stability regulation by proteins that bind AU-rich elements	53/86	1.99584e-09	9.20581e-08	0	0	3.70322	74.1836	HSPB1;ELAVL1;PSMD8;PSMD9;PSMD6;PSMD7;XPO1;PSMD4;PSMD5;PSMD3;PSMA6;PSMA4;PSMA1;XRN1;PSMA2;MAPKAPK2;PSME1;PABPC1;UBA52;DCP2;PSMD10;PSMD12;PSMD11;SET;ANP32A;PSMD14;PSMD13;PSMB10;EXOSC7;PSMB6;PSMB7;EXOSC5;PSMB4;EXOSC4;PSMB5;PSMB2;UBB;PSMB3;EXOSC9;PSMB1;UBC;RPS27A;EXOSC1;HSPA8;PSMB8;PSMB9;PSMC5;PSMC6;PSMC4;PSMC1;PSMC2;HNRNPD;HSPA1A
Apoptosis regulation	49/78	3.18944e-09	1.41006e-07	0	0	3.8945	76.1898	CDKN1A;CASP9;PSMD8;PSMD9;PSMD6;PSMD7;PSMD4;PSMD5;CASP3;CHEK1;PSMD3;DCC;UNC5B;ARHGAP10;PSMA6;PSMA4;IFNG;PSMA1;CCNE1;PSMA2;PSME1;UBA52;PSMD10;PSMD12;PSMD11;PSMD14;PSMD13;POMP;PSMB10;PSMB6;PSMB7;PSMB4;PSMB5;PSMB2;UBB;PSMB3;PSMB1;UBC;RPS27A;PAK2;PSMB8;PSMB9;PSMC5;PSMC6;PSMC4;PSMC1;PSMC2;MDM2;ATM
Licensing factor removal from origins	41/61	3.2481e-09	1.41006e-07	0	0	4.72186	92.2897	PSMD10;PSMD12;PSMD11;MCM7;PSMD14;PSMD13;GMNN;ODC1;PSMB10;CDC20;PSMD8;PSMB6;PSMD9;PSMB7;PSMD6;PSMB4;PSMD7;PSMB5;PSMD4;PTTG1;PSMB2;PSMD5;PSMB3;PSMD3;PSMB1;NQO1;PSMB8;PSMB9;PSMA6;PSMC5;PSMA4;PSMC6;PSMA1;PSMA2;PSMC4;PSMC1;PSMC2;MCM3;PSME1;MCM4;MCM5
Activation of NF-kappaB in B cells	44/68	5.2979e-09	2.2342e-07	0	0	4.22369	80.4864	PSMD10;PSMD12;PSMD11;PSMD14;PSMD13;CUL1;BCL10;PSMB10;RELA;IKBKB;PSMD8;PSMB6;PSMD9;PSMB7;PSMD6;PSMB4;PSMD7;PSMB5;PSMD4;PSMB2;UBB;PSMD5;PSMB3;PSMD3;PSMB1;UBC;RPS27A;MAP3K7;SKP1;PSMB8;PSMB9;NFKBIA;PSMA6;PSMC5;PSMA4;PSMC6;PSMA1;PSMA2;PSMC4;PSMC1;PSMC2;PSME1;REL;UBA52
Autodegradation of Cdh1 by Cdh1-APC/C	39/58	7.71305e-09	3.16235e-07	0	0	4.7267	88.2963	PSMD10;PSMD12;PSMD11;PSMD14;PSMD13;ANAPC10;PSMB10;PSMD8;PSMB6;PSMD9;PSMB7;PSMD6;FZR1;PSMB4;CDC23;PSMD7;PSMB5;PSMD4;PSMB2;PSMD5;PSMB3;CDC26;CDC27;PSMD3;PSMB1;UBE2C;PSMB8;PSMB9;PSMA6;PSMC5;PSMA4;PSMC6;PSMA1;PSMA2;PSMC4;PSMC1;CDC16;PSMC2;PSME1
Degradation of beta-catenin by the destruction complex	46/73	8.35554e-09	3.33318e-07	0	0	3.9255	73.0156	PSMD10;GSK3B;PSMD12;PSMD11;PSMD14;PSMD13;CUL1;PSMB10;CDC20;PSMD8;PSMB6;PSMD9;PSMB7;PSMD6;FZR1;PSMB4;PSMD7;PSMB5;PPP2R1B;PSMD4;PSMB2;UBB;PPP2R1A;PPP2R5E;PSMD5;PSMB3;PSMD3;PSMB1;UBC;RPS27A;SKP1;PSMB8;RBX1;PSMB9;PSMA6;PSMC5;PSMA4;PSMC6;PSMA1;APC;PSMA2;PSMC4;PSMC1;PSMC2;PSME1;UBA52
Capped intron-containing pre-mRNA processing	74/138	1.02801e-08	3.99299e-07	0	0	2.66941	49.0986	NUP107;NUP188;HNRNPU;HNRNPR;YBX1;SNRPD2;CLP1;SNRPD1;MAGOH;SNRPD3;METTL3;SMC1A;SRRM1;NUP93;HNRNPH1;NUP50;SRSF2;SRSF3;SNRPE;SRSF4;HNRNPH2;NUP54;SNRPA1;NUP98;SNRPF;SRSF5;SRSF7;SF3B4;SLBP;NUP205;POM121;SF3B2;SEH1L;RBM8A;SF3B6;DDX23;U2AF1;NUP160;PABPN1;NUP85;U2AF2;POLR2C;PCBP2;TPR;POLR2D;NUP88;POLR2H;HNRNPA1;POLR2I;POLR2J;RAE1;POLR2K;HNRNPA0;POLR2L;RANBP2;HNRNPA3;SF3A1;SF3A2;CPSF1;NUP155;ALYREF;NUP153…
Antigen presentation: folding, assembly, and peptide loading of class I MHC proteins	120/255	1.39166e-08	5.26688e-07	0	0	2.05741	37.219	UBE3C;LRR1;KEAP1;CBLB;UBE2L6;PARK2;CDC20;PSMD8;PSMD9;NPEPPS;PSMD6;CDC23;PSMD7;PSMD4;PSMD5;CDC26;CDC27;PSMD3;SKP2;B2M;SKP1;PDIA3;WSB1;FBXW8;FBXW7;HLA-B;TAP2;UBE4A;CYBA;HLA-A;HLA-F;HLA-G;HLA-E;RBX1;RNF41;PSME1;RBCK1;UBE2V1;UBA52;PSMD10;ANAPC13;PSMD12;PSMD11;CUL5;PSMD14;UBA7;SAR1B;PSMD13;CUL3;CUL2;CUL1;UBR1;ANAPC10;UBB;UBC;SEC31A;UBE2F;UBE2H;SMURF2;UBE2B;UBE2C;ZBTB16;LNPEP;UBE2A;UBE2S;CDC16;TPP2;UBA…
Mitotic G1-G1/S phases	72/135	2.18184e-08	7.94016e-07	0	0	2.6378	46.5322	RB1;TOP2A;CDKN1A;MCM7;PPP2R2A;CKS1B;PSMD8;PSMD9;PSMD6;CCND2;PSMD7;CCND1;PPP2R1B;PSMD4;PPP2R1A;PSMD5;PSMD3;MYBL2;TK2;SKP2;POLE;SKP1;CCNA2;CCNA1;PSMA6;PSMA4;PSMA1;CCNE1;PSMA2;PSME1;MCM3;MCM4;MCM5;UBA52;PSMD10;PSMD12;PSMD11;PCNA;PSMD14;PSMD13;HDAC1;PRIM1;CUL1;TYMS;PSMB10;PSMB6;PSMB7;CCNB1;PSMB4;CDC45;PSMB5;UBB;PSMB2;PSMB3;ORC2;UBC;PSMB1;RPS27A;RRM2;CDKN2A;PPP2R3B;PSMB8;PSMB9;PSMC5;PSMC6;CDK4;PSMC4;P…
DNA replication pre-Initiation	52/88	2.2056e-08	7.94016e-07	0	0	3.32929	58.6944	RB1;CDKN1A;MCM7;GMNN;PSMD8;PSMD9;PSMD6;PSMD7;PSMD4;PSMD5;PSMD3;POLE;CCNA2;CCNA1;PSMA6;PSMA4;PSMA1;PSMA2;MCM3;PSME1;MCM4;MCM5;UBA52;PSMD10;PSMD12;PSMD11;PSMD14;PSMD13;PRIM1;PSMB10;PSMB6;PSMB7;FZR1;PSMB4;CDC45;PSMB5;PSMB2;UBB;PSMB3;ORC2;PSMB1;UBC;RPS27A;PSMB8;PSMB9;PSMC5;PSMC6;PSMC4;PSMC1;RPA3;PSMC2;RPA4
Interferon signaling	85/168	3.15974e-08	1.11042e-06	0	0	2.3654	40.851	EIF4A2;IFITM3;EIF4A1;IFITM1;IFITM2;NUP107;NUP188;IFNA2;UBE2L6;ADAR;IFI30;IFIT1;ICAM1;IFIT2;MT2A;TRIM25;KPNA4;KPNA5;ARIH1;KPNA2;B2M;KPNA1;HLA-DPA1;DDX58;IFNGR2;HLA-B;HLA-A;HLA-F;HLA-G;HLA-E;NUP93;PPM1B;IFNG;OAS1;OAS2;NUP50;NUP54;NUP98;UBA52;HLA-DQB2;IRF9;HLA-DQB1;NUP205;POM121;CAMK2D;SEH1L;UBA7;CAMK2A;IFI6;USP18;NUP160;UBB;NUP85;TPR;UBC;NUP88;GBP2;RPS27A;CAMK2G;GBP1;RAE1;IFNA21;IP6K2;RANBP2;PTPN1;…
Cell cycle checkpoints	64/117	3.65718e-08	1.25535e-06	0	0	2.78541	47.6974	CDKN1A;MCM7;CDC20;PSMD8;PSMD9;PSMD6;CDC23;PSMD7;PSMD4;PSMD5;CDC26;CDC27;CHEK1;PSMD3;RFC5;RFC4;CDC25C;PSMA6;PSMA4;PSMA1;CCNE1;PSMA2;PSME1;MCM3;MCM4;MCM5;UBA52;PSMD10;PSMD12;PSMD11;PSMD14;PSMD13;ANAPC10;PSMB10;PSMB6;CCNB2;PSMB7;CCNB1;PSMB4;CDC45;PSMB5;UBB;PSMB2;PSMB3;ORC2;UBC;PSMB1;BUB3;RPS27A;UBE2C;PSMB8;PSMB9;PSMC5;PSMC6;PSMC4;PSMC1;RPA3;CDC16;PSMC2;CDK1;MDM2;ATM;RAD1;MAD2L1
Messenger RNA processing	97/203	1.3217e-07	4.4337e-06	0	0	2.11436	33.4897	NUP107;NUP188;HNRNPU;HNRNPR;LSM10;SNRPD2;CLP1;SNRPD1;MAGOH;SNRPD3;METTL3;PRPF4B;SRRM1;NUP93;SRSF2;SRSF3;SNRPE;SRSF4;NUP98;SNRPF;SRSF5;SRSF7;SLBP;NUP205;POM121;SEH1L;DHX8;RBM8A;NUP160;NUP85;PCBP2;TPR;NUP88;CPSF1;NUP155;ALYREF;NUP153;SUPT5H;A1CF;LSM2;LSM7;HNRNPK;HNRNPF;HNRNPD;HNRNPC;CELF2;SRP54;ADAR;YBX1;DHX15;DHX16;RBM17;SMC1A;PTBP2;SFPQ;HNRNPH1;NUP50;HNRNPH2;NUP54;SNRPA1;SF3B4;SF3B2;RNMT;SF3B6;DD…
Non-coding RNA metabolism	33/50	2.16409e-07	7.09823e-06	0	0	4.46625	68.5395	NUP205;POM121;NUP107;SEH1L;NUP188;PHAX;NUP160;SNRPD2;SNRPD1;NUP85;TGS1;TPR;SMN2;NUP88;SNRPD3;SMN1;RAE1;RANBP2;NUP155;NUP153;WDR77;NUP93;NUP50;GEMIN4;GEMIN5;NUP35;NUP54;SNRPE;GEMIN7;NUP98;SNRPF;NUPL2;NUP37
HIF-1 degradation in normoxia	50/88	2.298e-07	7.37359e-06	0	0	3.03132	46.3369	SETD2;SAT2;PSMD8;PSMD9;PSMD6;PSMD7;PSMD4;PSMD5;PSMD3;PSMA6;PSMA4;PSMA1;PSMA2;PSME1;PSMD10;CAMK2D;PSMD12;PSMD11;PSMD14;HDAC1;PSMD13;CAMK2A;TXN;HDAC9;HIF1A;PSMB10;PSMB6;MAPK9;PSMB7;PSMB4;MAPK7;PSMB5;PSMB2;PSMB3;PSMB1;MAPK1;TCEB1;CAMK2G;CREBBP;PSMB8;PSMB9;PSMC5;PSMC6;PSMC4;APEX1;PSMC1;ID1;PSMC2;PSMG4;PSMG2
Interactions of HIV Vpr protein with host cellular proteins	30/44	2.61316e-07	8.20645e-06	0	0	4.92889	74.7098	NUP205;POM121;NUP107;SEH1L;NUP188;PSIP1;NUP160;XPO1;NUP85;TPR;BANF1;NUP88;RAE1;KPNA1;RANBP2;RANBP1;NPM1;NUP155;NUP153;NUP93;NUP50;NUP35;NUP54;NUP98;NUPL2;SLC25A5;SLC25A4;HSPA1A;NUP37;SLC25A6
Lysosome	63/121	5.03157e-07	1.54721e-05	0	0	2.5042	36.3168	HEXB;CLTC;HEXA;AP4E1;TCIRG1;LIPA;CTSS;SGSH;LAPTM4B;CTSO;NAGLU;CTSL;AP1S2;AP1S1;CTSH;ACP2;AP3S2;AP3S1;GUSB;CTSC;HGSNAT;ATP6V0B;MANBA;ATP6AP1;ENTPD4;AP1B1;AP3B2;SUMF1;PLA2G15;NPC2;DNASE2;CD63;ASAH1;IDUA;CLN5;GGA2;AP3M1;NEU1;ATP6V0A4;AGA;AP1M1;CTSA;ABCA2;CD164;NAPSA;SORT1;FUCA1;AP3D1;LAPTM5;CTNS;NAGA;MCOLN1;AP4B1;IGF2R;GALC;GNPTG;PPT1;MAN2B1;TPP1;PPT2;CD68;GLA;LGMN
Translation factors	32/50	9.35208e-07	2.81707e-05	0	0	4.08933	56.7701	EIF4A2;EIF4A1;EEF1B2;EIF4EBP3;EIF2B1;EIF5A;EIF5B;EIF2B4;EIF2B3;EIF2B2;EIF2AK3;EIF2AK2;EEF2;EIF2S2;EIF1;EEF1G;EIF2S3;EIF5;EIF6;EEF1D;EIF3I;EEF1A2;EIF3J;EIF3G;EIF3H;ETF1;EIF3E;PABPC1;EIF3F;EIF3C;EIF4G3;EIF3A
M phase pathway	52/96	1.01339e-06	2.99152e-05	0	0	2.7224	37.5751	NUP107;ZWILCH;SMC3;CDC20;XPO1;PPP2R1B;PPP2R1A;PPP2R5E;NUF2;NDEL1;SEC13;KIF23;SMC1A;CKAP5;CLIP1;KIF2A;GORASP1;BIRC5;KIF2C;KIF20A;NUP98;MAPRE1;ITGB3BP;PAFAH1B1;SEH1L;CDCA8;CENPA;PMF1;AURKB;NUP160;CENPC;NUP85;BUB3;BUB1;CLASP1;CLASP2;RANBP2;RCC2;PLK1;NDC80;KIF18A;STAG1;APITD1;RPS27;STAG2;CENPH;CENPI;TAOK1;CENPM;CENPO;MAD2L1;NUP37
Protein processing in the endoplasmic reticulum	80/166	1.04351e-06	3.02005e-05	0	0	2.14634	29.5614	UFD1L;HSP90AB1;TUSC3;PRKCSH;NGLY1;PARK2;HERPUD1;MAN1A2;SEC61G;CAPN1;SEC61B;SIL1;SEC63;SKP1;PDIA3;SEC13;SSR4;SSR2;SSR3;MOGS;UBE4B;YOD1;RAD23B;DDOST;RBX1;DNAJC3;DAD1;DNAJC5;CANX;ERP29;PLAA;PREB;VIMP;ATF4;VCP;RPN2;SAR1B;SEL1L;CUL1;DERL1;DERL2;RRBP1;RNF5;HSP90B1;LMAN1;MAPK9;GANAB;LMAN2;UBQLN1;SSR1;MAP2K7;UGGT2;SEC23B;UBQLN4;UGGT1;SEC31A;TXNDC5;EDEM3;HSPA8;XBP1;SEC24B;SEC24A;WFS1;AMFR;EDEM2;EIF2AK3;EI…
Proteasome complex	19/24	1.13362e-06	3.21775e-05	0	0	8.73034	119.519	PSMD12;PSMD11;PSMD14;RPN2;UBE2A;PSMB6;PSMA6;PSMB7;PSMB4;PSMA4;PSMB5;PSMA1;PSMB2;PSMD4;PSMA2;PSMB3;PSMB1;PSMD3;UBA1
Protein folding	33/53	1.5802e-06	4.40071e-05	0	0	3.79549	50.7	USP11;ACTB;TUBA1C;AP3M1;TUBA1B;TUBB6;TUBA1A;TUBB3;KIF13A;LONP2;CCT7;CCT5;CCT4;CCT3;NOP56;CCT2;ARFGEF2;FBXW5;FBXW7;VBP1;FBXW9;TBCD;TBCB;TUBB4B;TUBB4A;TUBA4A;CCT6A;TUBB2A;TCP1;SKIV2L;KIFC3;PFDN4;PFDN5
Immune system signaling by interferons, interleukins, prolactin, and growth hormones	122/280	1.86061e-06	5.08567e-05	0	0	1.78483	23.5501	EIF4A2;IFITM3;EIF4A1;IFITM1;IFITM2;NUP107;NUP188;UBE2L6;IRS2;IFI30;IFIT1;ICAM1;IFIT2;MT2A;TRIM25;KPNA4;KPNA5;KPNA2;B2M;IL6R;MAP3K7;SKP1;KPNA1;HLA-B;HLA-A;HLA-F;HLA-G;HLA-E;RBX1;NUP93;ADAM17;NUP98;UBE2V1;IL6ST;RAF1;UBA52;SQSTM1;NUP205;POM121;SEH1L;UBA7;CUL1;PIK3R2;PIK3R1;NUP160;UBB;NUP85;INPP5D;TPR;UBC;NUP88;IFNA21;IP6K2;MAP2K6;YES1;NUP155;EIF2AK2;ISG15;NUP153;ISG20;IL7;TOLLIP;CDK1;PIN1;TAB2;EIF4G…
Adherens junction cell adhesion	42/74	2.16852e-06	5.81952e-05	0	0	3.02103	39.3987	CTNND1;PTPRM;WASL;IQGAP1;MLLT4;ACTB;PTPRF;ACTG1;CDC42;RAC2;CTNNA1;EP300;RAC3;MAPK1;RAC1;ACP1;MAP3K7;WASF2;WASF3;FARP2;PTPN1;TCF7L2;CREBBP;SMAD4;TCF7L1;SMAD3;YES1;CSNK2A1;INSR;CSNK2A2;LMO7;ACTN4;SORBS1;BAIAP2;RHOA;TJP1;FER;PTPRB;PARD3;CSNK2B;PVRL2;PVRL1
Amino acid metabolism	90/195	2.38431e-06	6.28436e-05	0	0	1.97829	25.6121	SQRDL;FTCD;CNDP2;PSMD8;PSMD9;PSMD6;PSMD7;PSMD4;PSMD5;PSMD3;DBT;PHGDH;GLUL;ENOPH1;TSHB;MCCC2;ACAD8;BCKDHA;ARG2;FSHB;GPT2;BCKDHB;KMO;PSMA6;PSMA4;PSMA1;TST;PSMA2;ETHE1;PSME1;IDO2;AGXT;BCAT1;ALDH7A1;DLD;ALDH9A1;BCAT2;PSMD10;TPH1;PSMD12;PSMD11;PSMD14;PSMD13;HDC;ODC1;OAZ1;HSD17B10;OAZ2;PSMB10;ACAT1;SRM;PSMB6;PSMB7;PSMB4;PSMB5;AANAT;PSMB2;MAT2A;PSMB3;CBS;AFMID;PSMB1;ASL;PCBD1;CKB;NQO1;GOT1;SMOX;GOT2;ASN…
HIV life cycle	60/118	2.58126e-06	6.68409e-05	0	0	2.38376	30.6724	FEN1;CCNT2;NUP107;CCNT1;NUP188;GTF2B;PSIP1;XPO1;BANF1;NELFE;VPS37B;NUP93;NUP50;NUP54;NUP98;PPIA;UBA52;VPS28;GTF2A1;NUP205;POM121;GTF2A2;SEH1L;RNMT;TAF9;SUPT4H1;GTF2E2;NUP160;UBB;NUP85;POLR2C;TPR;UBC;POLR2D;TCEB2;NUP88;TCEB1;POLR2H;POLR2I;RPS27A;POLR2J;RAE1;POLR2K;POLR2L;RANBP2;RANBP1;NUP155;XRCC5;TAF13;TAF10;NUP153;GTF2H2;SUPT5H;GTF2H4;NMT2;NUP35;NUPL2;TAF4;NUP37;TAF1
Cooperation of prefoldin and TriC/CCT in actin and tubulin folding	20/27	3.62947e-06	9.23638e-05	0	0	6.56431	82.2273	CCT3;CCT2;VBP1;TUBB4B;TUBB4A;ACTB;TUBA4A;CCT6A;TUBA1C;TUBA1B;TUBB6;TUBA1A;TUBB2A;TUBB3;TCP1;CCT7;PFDN4;PFDN5;CCT5;CCT4
Spliceosome	63/127	4.26398e-06	0.000106672	0	0	2.26845	28.0501	TCERG1;DDX42;HNRNPU;USP39;PQBP1;SNRPD2;SNRPD1;MAGOH;DHX15;DHX16;SNRPD3;RBM17;BUD31;PRPF40B;THOC3;THOC2;PLRG1;WBP11;SRSF2;SRSF3;SNRPE;SRSF4;SNRPA1;SNRPF;SRSF5;SNRPC;SRSF7;SRSF8;SF3B4;SF3B2;DHX8;RBM8A;SF3B6;DDX23;U2AF1;ZMAT2;PUF60;U2AF2;TRA2B;TRA2A;HNRNPA1;HSPA8;HNRNPA3;PPIL1;SF3A1;PRPF38A;SF3A2;ALYREF;CWC15;HSPA2;MAGOHB;LSM4;LSM3;LSM2;LSM8;LSM7;HNRNPK;LSM6;PHF5A;HNRNPC;RBMX;HSPA1B;HSPA1A
Transport of mature transcript to cytoplasm	33/55	5.10172e-06	0.000125502	0	0	3.44995	42.0409	SLBP;NUP205;POM121;NUP107;SEH1L;NUP188;RBM8A;U2AF1;NUP160;NUP85;U2AF2;MAGOH;TPR;NUP88;RAE1;RANBP2;CPSF1;NUP155;ALYREF;NUP153;SRRM1;NUP93;NUP50;SRSF2;SRSF3;NUP35;NUP54;SRSF4;NUP98;SRSF5;NUPL2;SRSF7;NUP37
Chemiosmotic coupling formation of ATP	12/13	5.75194e-06	0.000139178	0	0	27.5456	332.364	ATP5B;ATP5E;ATP5A1;ATP5D;ATP5C1;ATP5J;ATP5H;ATP5F1;ATP5O;ATP5G1;ATP5J2;ATP5L
CDC42 signaling events	39/70	9.09659e-06	0.000216557	0	0	2.89451	33.5983	ATF2;GSK3B;ARPC1B;RASGRF1;WASL;IQGAP1;PIK3R1;CBL;PLD1;EPS8;CDC42;MAPK9;CTNNA1;MAPK1;RAC1;MAP2K7;HRAS;PAK2;MAP2K6;MAP2K3;ACTR2;JUN;MAP3K1;YES1;TNK2;ARPC4;BRAF;BAIAP2;CDC42BPA;MTOR;ENAH;DLG1;PIK3CA;APC;RPS6KB1;ARPC3;MYL2;RAF1;BCAR1
Immune system	365/998	1.02002e-05	0.000238977	0	0	1.34161	15.4192	ATF1;EIF4A2;IFITM3;ATF2;EIF4A1;APP;IFITM1;NUP107;IFITM2;LRR1;ICAM2;KEAP1;UBE2L6;CBLB;C4BPB;IFI30;IFIT1;ICAM1;IFIT2;PSMD8;CDC20;PSMD9;LGALS3;PSMD6;MT2A;PSMD7;CDC23;PSMD4;PPP2R1B;PSMD5;PPP2R1A;CDC26;AKT3;PSMD3;CDC27;RPS6KA1;AP1S2;TRIM25;AP1S1;SKP2;B2M;ICOSLG;SKP1;MEF2A;WSB1;AP1B1;HLA-B;HLA-A;HLA-F;HLA-G;HLA-E;NUP93;DYNC1LI2;PSME1;ORAI1;TXNIP;RBCK1;KIF20A;NUP98;UBA52;DEFB103A;ANAPC13;NUP205;POM121;S…
Mitochondrial protein import	31/52	1.18181e-05	0.000272555	0	0	3.39431	38.5114	TOMM40;ATP5A1;COX17;TIMM13;HSCB;TAZ;ATP5G1;TOMM20;HSPD1;TIMM50;ATP5B;SAMM50;PMPCB;TIMM17B;CYC1;TIMM8B;MTX1;IDH3G;MTX2;TIMM22;TIMM44;BCS1L;CS;COQ2;TOMM7;VDAC1;ACO2;FXN;SLC25A4;TOMM5;SLC25A6
E-cadherin nascent AJ-like junctions pathway	25/39	1.40162e-05	0.000318276	0	0	4.10402	45.8636	CYFIP2;CTNND1;IQGAP1;PIK3R1;MLLT4;CDC42;RAP1A;CCND1;CTNNA1;PIP5K1C;RAC1;WASF2;AP1M1;CSNK2A1;JUP;CSNK2A2;RHOA;NME1;ENAH;TJP1;DLG1;CTTN;PIK3CA;CSNK2B;CRK
EGFR1 pathway	71/152	1.60127e-05	0.000358101	0	0	2.02017	22.3069	CDKN1A;CSF1;PPP1R10;MT1L;MT1M;ARHGAP1;HSPB1;MT1X;PIK3C2G;FGF7;PNP;CCND1;CA2;COTL1;CTSH;MYBL2;PHLDA1;IER3;DUSP4;ACOT7;ANXA1;DUSP1;MMP1;ITGA2;TUBB;ARID5B;TUBG1;DUSP6;PPAP2B;MT1F;MCM3;MT1G;TXNIP;MT1H;HPRT1;MT1B;RAF1;SQSTM1;HBEGF;PRPS1;NUP205;GRN;LRP1;TGFA;DDX21;ZFP36L2;CDC42;SELENBP1;SPP1;HAS2;ADSS;IGBP1;NOP56;RANBP1;TGFB2;RRM2;GADD45A;UBE2A;ESR1;HNRNPAB;VEGFA;BCL6;CDK5;PIK3IP1;CDK4;CDC16;ZYX;CYCS;I…
Signaling events mediated by focal adhesion kinase	35/62	1.76139e-05	0.000388033	0	0	2.98135	32.6363	ITGB1;ROCK2;ARHGEF28;ASAP1;WASL;PIK3R1;ETS1;ARHGAP35;MAPK9;RAP1A;CCND1;RRAS;MAPK1;ITGAV;RAC1;NCK1;SH3GL1;ARHGEF11;JUN;YES1;BRAF;ACTN4;BMX;MAPK8IP3;RHOA;PTK2;PIK3CA;RASA1;ITGA5;RAF1;SOS1;TLN1;CRK;DOCK1;BCAR1
Apoptosis	104/242	2.09691e-05	0.000455153	0	0	1.73928	18.7363	TNF;PSMD8;PSMD9;PSMD6;PSMD7;PSMD4;FNTA;PSMD5;AKT3;PSMD3;TNFSF10;CHP1;CAPN1;KPNA1;ENDOG;UNC5B;PRKAR1A;PSME1;UBA52;PSMD10;PSMD12;PSMD11;PSMD14;PSMD13;ENDOD1;PIK3R2;PIK3R1;PPP3R1;UBB;PRKAR2A;UBC;BMF;RIPK1;FADD;JUN;IGF2;TNFRSF10C;BMX;PTK2;NFKBIA;H1F0;STK26;MDM2;CYCS;ATM;MYD88;PIK3CB;IKBKB;CASP9;PPP3CA;CASP6;CASP3;HIST1H1D;HIST1H1A;HIST1H1B;DFFA;DCC;IRAK3;IRAK4;TRAF1;DYNLL1;TNFRSF1B;DYNLL2;TNFRSF1A;PS…
Rev-mediated nuclear export of HIV-1 RNA	19/27	2.15359e-05	0.000460682	0	0	5.45529	58.6213	RANBP2;RANBP1;NUP205;POM121;SEH1L;NUP188;NUP155;NUP153;NUP93;XPO1;NUP85;NUP50;TPR;NUP35;NUP88;NUP98;NUPL2;RAE1;KPNA1
Signaling by the B cell receptor (BCR)	70/151	2.5024e-05	0.00052765	0	0	1.99138	21.1	GSK3B;CDKN1A;GSK3A;SH3KBP1;PTEN;CBLB;PSMD8;CASP9;IKBKB;PSMD9;PSMD6;PSMD7;PSMD4;PSMD5;AKT3;PSMD3;MLST8;MAP3K7;HRAS;SKP1;NCK1;PDPK1;PSMA6;PSMA4;PSMA1;PSMA2;PSME1;ORAI1;SOS1;UBA52;PSMD10;PSMD12;PSMD11;PHLPP1;PSMD14;PSMD13;CUL1;ITPR2;ITPR3;BCL10;PIK3R1;CBL;PSMB10;RELA;PSMB6;PSMB7;PSMB4;PSMB5;UBB;PSMB2;PSMB3;UBC;PSMB1;PLCG2;RICTOR;RPS27A;BAD;MTOR;PSMB8;PSMB9;NFKBIA;PSMC5;PSMC6;PSMC4;PSMC1;PSMC2;MDM2;R…
Mitotic G2-G2/M phases	45/87	2.55285e-05	0.000530706	0	0	2.4656	26.0755	CEP57;NUMA1;TUBGCP2;CETN2;DCTN3;CCP110;CCNB2;ACTR1A;PCM1;CCNB1;TUBA1A;XPO1;PPP2R1A;PCNT;CEP290;CLASP1;PLK4;DYNC1H1;CDK11A;CEP135;TUBB;CEP152;PLK1;CSNK1E;TUBG2;CDC25C;DYNLL1;TUBG1;TUBB4B;CKAP5;CDK11B;TUBB4A;HAUS2;TUBA4A;CCNA2;CCNA1;AKAP9;CDK1;FGFR1OP;TUBGCP3;CEP63;TUBGCP4;MAPRE1;PAFAH1B1;SDCCAG8
Transport of mature mRNAs derived from intronless transcripts	24/38	2.99685e-05	0.000614354	0	0	3.9392	41.0282	RANBP2;SLBP;NUP205;POM121;NUP107;SEH1L;NUP188;CPSF1;NUP155;ALYREF;NUP153;NUP160;NUP93;XPO1;NUP85;NUP50;TPR;NUP35;NUP88;NUP54;NUP98;NUPL2;RAE1;NUP37
Asparagine N-linked glycosylation	44/85	3.04889e-05	0.00061646	0	0	2.46938	25.677	DPAGT1;B4GALT3;B4GALT1;RPN2;PRKCSH;TUSC3;SAR1B;LMAN1;GANAB;MAN2A2;MAN1A2;MAN2A1;GNPNAT1;MGAT1;ST8SIA6;UGGT2;UGGT1;SEC31A;PDIA3;EDEM3;SEC13;ST6GAL1;SEC24B;SEC24A;ALG5;EDEM2;PMM2;ALG14;ALG2;ALG13;ALG3;MOGS;ALG1;ALG10;DDOST;DPM1;DPM2;DPM3;DAD1;CANX;RFT1;PREB;SEC24D;B4GALT5
N-cadherin signaling events	22/34	3.72674e-05	0.000743334	0	0	4.21197	42.9511	PTPN1;DAGLA;GSN;ROCK1;JUP;CTNND1;PTPN11;PIK3R1;RHOA;CDC42;GJA1;FER;CTTN;PIK3CA;KIF5B;MYL2;CTNNA1;PIP5K1C;RAC1;DAGLB;MAPRE1;CAMK2G
TNF-alpha signaling pathway	50/101	4.2893e-05	0.000844135	0	0	2.25651	22.6933	TNF;CASP9;IKBKB;CASP3;RAC1;GLUL;MAP3K7;SKP1;MAP2K3;MAP4K2;CSNK2A1;KSR1;CYBA;TRAF1;TNFRSF1B;TNFRSF1A;ADAM17;CDC37;MADD;RAF1;SOS1;SQSTM1;NSMAF;BIRC3;CUL1;TXN;TANK;RELA;MAPK9;MAPK1;RIPK1;FADD;MAP2K7;BID;MAP4K5;MAP4K3;MAP2K6;MAP4K4;TRAP1;CREBBP;JUN;MAP3K1;BAD;STAT1;PLK1;GNB2L1;NFKBIA;REL;TAB2;NOX1
Nectin adhesion pathway	20/30	4.46196e-05	0.000866559	0	0	4.59402	46.0199	FARP2;PDGFB;PTPRM;IQGAP1;PIK3R1;F11R;CLDN1;MLLT4;PTK2;CDC42;RAP1A;PIK3CA;CTNNA1;ITGAV;PIP5K1C;RAC1;TLN1;CRK;PVRL2;PVRL1
Adaptive immune system	229/606	4.63502e-05	0.00088848	0	0	1.40701	14.041	IFITM1;LRR1;ICAM2;KEAP1;CBLB;UBE2L6;IFI30;ICAM1;PSMD8;CDC20;PSMD9;PSMD6;PSMD7;CDC23;PSMD4;PPP2R1B;PSMD5;PPP2R1A;CDC26;AKT3;PSMD3;CDC27;AP1S2;AP1S1;SKP2;B2M;ICOSLG;SKP1;WSB1;AP1B1;HLA-B;HLA-A;HLA-F;HLA-G;HLA-E;DYNC1LI2;PSME1;ORAI1;RBCK1;KIF20A;UBA52;ANAPC13;SAR1B;PIK3R2;BCL10;PIK3R1;ANAPC10;RACGAP1;INPP5D;PLCG2;SEC31A;CTSA;VASP;YES1;LNPEP;CDC16;REL;CALM1;CD200;LGMN;CDKN1A;LRSAM1;CD40;SH3KBP1;CLTC;…
Cholesterol biosynthesis	17/24	5.20507e-05	0.00098496	0	0	5.5769	55.0066	FDPS;IDI1;SREBF1;MVK;DHCR24;MSMO1;HMGCR;HSD17B7;LSS;SQLE;EBP;PMVK;SC5D;MVD;DHCR7;LBR;FDFT1
Aurora B signaling	24/39	5.54923e-05	0.00103679	0	0	3.67633	36.0253	NPM1;CBX5;CUL3;CDCA8;NCAPG;PEBP1;KIF23;CENPA;AURKB;NCAPH;NDC80;RHOA;AURKA;RACGAP1;RASA1;STMN1;BIRC5;KIF2C;NCAPD2;TACC1;KIF20A;VIM;BUB1;EVI5
Integrated breast cancer pathway	69/152	6.51718e-05	0.00120242	0	0	1.91504	18.4581	ATF1;RB1;GSK3A;USP38;CERK;ZMYND8;ARAF;PTEN;CASP9;STK11;CCND1;ZMIZ1;CASP3;CHEK1;DAG1;EP300;RAC1;RPP38;ANXA1;RALGAPA1;MMP1;DCAKD;NCOA3;TSC1;SIRT1;ITPKC;LGALS13;GRN;RALA;HDAC1;MYCBP2;PIK3R2;HMGCR;AURKA;CDC42;RAP1A;RRAS;NUP85;TPR;MAPK1;FADD;BID;UBE2F;PLK3;SMAD1;JUN;SMAD4;GADD45A;BAD;STAT1;PLK1;BRAF;SMAD6;ESR1;MTOR;PML;HIPK2;VEGFA;FER;RAD50;RAD51;CDK4;RHEB;PKIA;MDM2;NF1;ATM;KRAS;FAU
Renal cell carcinoma	37/70	7.16135e-05	0.00130357	0	0	2.57842	24.609	FH;CUL2;ARAF;PDGFB;TGFA;PIK3R2;PIK3CB;PIK3R1;ETS1;HIF1A;CDC42;FLCN;RAP1A;AKT3;PAK7;EP300;MAPK1;TCEB2;TCEB1;RAC1;HRAS;PAK2;EGLN1;ARNT2;CREBBP;JUN;TGFB2;EGLN2;BRAF;PTPN11;RBX1;VEGFA;PIK3CA;KRAS;RAF1;SOS1;CRK
Downregulation of ERBB4 signaling	8/8	7.24205e-05	0.00130357	0	0	111384	1.06183e+06	ITCH;UBB;ERBB4;NEDD4;UBC;WWP1;RPS27A;UBA52
HIV-1 Nef as negative effector of Fas and TNF	32/58	7.34928e-05	0.00130693	0	0	2.82945	26.9316	RB1;NUMA1;PRKDC;XIAP;PSEN1;TNF;RELA;ACTG1;CASP9;CASP6;CASP3;ARHGDIB;LMNA;RIPK1;FADD;BID;MAP2K7;PAK2;DFFA;CDK11A;GSN;MAP3K1;TRAF1;TNFRSF1B;CDK11B;PTK2;TNFRSF1A;NFKBIA;RASA1;MDM2;CYCS;BIRC3
TGF-beta signaling pathway	81/185	7.60304e-05	0.00133596	0	0	1.79501	17.0245	ITGB1;ATF2;ZFYVE9;TGFB1I1;SERPINE1;PPP2R2A;ARRB2;ETS1;TNF;CCND1;EP300;RAC1;MAP3K7;HRAS;SKP1;MAP2K3;MEF2A;PDPK1;RHOA;UCHL5;RBX1;TGFBR3;PPM1A;ZEB1;IFNG;HGS;SIK1;RAF1;SOS1;ENG;HDAC1;CAMK2A;CUL1;NEDD9;XIAP;PIK3R2;PIK3R1;NR2C2;LTBP1;HDAC9;CDC42;CCNB2;MAPK9;MAPK7;PRKAR2A;SPP1;MAPK1;MAP2K7;SKIL;PAK2;SPTBN1;MAP2K6;SMAD1;TRAP1;CREBBP;JUN;SMAD4;TGFB2;JUND;SMAD3;UBE2I;SMURF2;STAT1;STAT3;WWP1;NUP153;INHBA;SM…
PDGFB signaling pathway	60/129	8.15464e-05	0.00141603	0	0	2.00215	18.8489	CYFIP2;DOCK4;ARPC1B;PTEN;BRK1;PIK3CB;WASL;ARHGAP35;EPS8;PPP2R1A;ITGAV;RAC1;HRAS;NCK1;YWHAH;ACTR2;MYOCD;KSR1;PLA2G4A;ACTN4;ARAP1;RHOA;FGR;CTTN;PIK3CA;RASA1;RAF1;SOS1;CRK;LRP1;PDGFB;PIK3R2;IQGAP1;PIK3R1;CBL;MLLT4;SLC9A3R2;SLC9A3R1;MAPK9;RAP1A;MAPK1;MAP2K7;WASF2;PTPN1;JUN;RAB4A;JUND;YES1;STAT1;STAT3;EIF2AK2;ARPC4;BRAF;PTPN11;BAIAP2;ARPC3;PIN1;KRAS;RAB5A;BCAR1
ERBB1 downstream pathway	51/106	9.32482e-05	0.0016004	0	0	2.13399	19.8039	ATF1;CYFIP2;ATF2;ARF4;ARPC1B;PEBP1;BRK1;PPP2R2A;PIK3CB;WASL;EPS8;RPS6KA4;PPP2R1A;MLST8;RAC1;HRAS;YWHAH;ACTR2;KSR1;DUSP1;PDPK1;RPS6;DUSP6;PIK3CA;RAF1;SOS1;RALA;PIK3R2;IQGAP1;PIK3R1;PLD1;SLC9A1;CDC42;MAPK9;MAPK7;MAPK1;RICTOR;WASF2;SMAD1;JUN;MAP3K1;BAD;STAT1;STAT3;ARPC4;BRAF;BAIAP2;MTOR;ARPC3;KRAS;RAB5A
TGF-beta regulation of extracellular matrix	213/565	9.8735e-05	0.00167509	0	0	1.40041	12.9161	RB1;RPL5;SERPINE1;CCNF;NUDT2;IFIT1;CLDN1;LGALS3;GOLGA4;RPL18A;STMN1;ARL6IP5;TNFSF10;GABARAPL2;NSMCE1;ACSL3;ANK3;RNASE1;SEPP1;TM4SF1;BTD;MTHFD2;HECA;ZFPM2;ZNF395;GYPC;MGST1;MGST2;PIK3R1;MTMR4;ADH5;UGCG;RRAS;EPB41L2;SSR1;PLEK2;A2M;S100A11;S100A10;B3GALNT1;GSTM3;JAG1;CDSN;JUP;INSR;FN1;MICAL2;ZNF35;EXT1;EHD3;ID2;CDC16;SERPINA3;SRPX;NRP2;AKR1B1;SLC7A11;PTPRF;HERPUD1;UCHL1;CSRP2;PPP2R4;CTSL;KIF1B;CD34;…
Transcription	79/181	0.000105082	0.00176251	0	0	1.78468	16.349	HIST2H2AA3;CCNT2;CCNT1;GTF2B;LSM10;SNAPC5;SNAPC1;CLP1;SNAPC2;MAGOH;SNAPC4;UBTF;HIST1H2AD;SNRPD3;PTRF;HIST1H2AB;NELFE;H2AFZ;HIST1H2AJ;H2AFX;GTF3A;HIST2H2BE;SRRM1;HIST2H3A;SRSF2;SRSF3;HIST1H2BH;SNRPE;SRSF4;SNRPF;SRSF5;BDP1;SRSF7;GTF3C1;HIST1H2BN;SLBP;GTF2A1;HIST1H2BM;GTF2A2;RRN3;RBM8A;GTF3C5;HIST1H2BJ;RNMT;HIST1H2BL;HIST1H2BK;TAF9;SUPT4H1;U2AF1;GTF2E2;HIST1H3A;PABPN1;U2AF2;POLR2C;POLR2D;TCEB2;TCEB1…
Ubiquitin-mediated proteolysis	62/136	0.000128406	0.00212952	0	0	1.92905	17.2849	UBE3C;KEAP1;CBLB;UBE2L6;PARK2;CDC20;HERC3;CDC23;HERC1;CDC26;CDC27;SKP2;SKP1;PIAS4;FBXW8;FBXW7;UBE4A;UBE4B;MID1;RBX1;DDB2;UBE2R2;BIRC6;BIRC3;ANAPC13;CUL5;UBA7;CUL3;CUL2;CUL1;XIAP;RNF7;CBL;ANAPC10;RHOBTB2;FZR1;UBR5;TCEB2;TCEB1;UBE2F;UBE2H;UBE2I;MAP3K1;PPIL2;SMURF2;UBE2B;UBE2C;HUWE1;WWP1;UBE2A;PML;ITCH;UBE2S;NEDD4;CDC16;MDM2;UBA1;STUB1;TRIM37;TRIP12;UBE2K;TRIM32
FOXM1 transcription factor network	24/41	0.000169907	0.00278647	0	0	3.24335	28.1531	RB1;GSK3A;CREBBP;CDKN2A;LAMA4;PLK1;TGFA;XRCC1;FOXM1;CENPA;ESR1;AURKB;CKS1B;CCNA2;CCNB2;CCNB1;CCND1;CCNE1;CDK4;CDK1;EP300;BIRC5;SKP2;HSPA1B
MHC class II antigen presentation	49/103	0.000179442	0.00291051	0	0	2.08773	18.008	CLTC;KIF11;IFI30;CTSS;KIF15;ACTR1A;CTSO;CTSL;KIF5B;AP1S2;AP1S1;CTSH;CTSC;HLA-DPA1;SEC13;AP1B1;KIF23;DYNLL1;DYNLL2;DYNC1LI2;KIF2A;CANX;KIF2C;KIF20A;HLA-DQB2;HLA-DQB1;DCTN6;SAR1B;DCTN3;KLC1;HLA-DMA;KLC2;HLA-DMB;KIF3B;RACGAP1;KIF3A;KIF3C;DYNC1I1;AP1M1;SEC31A;CTSA;DYNC1H1;SEC24B;SEC24A;AP2B1;KIF18A;HLA-DPB1;SEC24D;LGMN
Androgen receptor signaling, proteolysis, and transcription regulation	43/88	0.000207846	0.00333457	0	0	2.19775	18.6341	RB1;GSK3B;CDKN1A;ROCK1;HDAC1;ROCK2;TGFB1I1;PTEN;PIK3R2;RNF6;PARK7;PIK3R1;NR2C2;RNF4;RELA;CDC42;CCND1;ZMIZ1;PRDX1;EP300;FLNA;KAT7;BMF;RAC1;PIAS4;CREBBP;JUN;SMAD4;SMAD3;UBE2I;NCOA3;STAT3;DSTN;SIRT1;RHOA;GNB2L1;PTK2;NCOR2;POMC;CCNE1;ZNF318;MDM2;STUB1
Rac1 cell motility signaling pathway	36/71	0.00026656	0.00423056	0	0	2.36464	19.4608	CYFIP2;ATF2;TRIO;ARPC1B;BRK1;IQGAP1;PIK3R1;ARHGAP5;PLD1;MAPK9;RACGAP1;CHN1;CTNNA1;ARFIP2;RAC1;PIP5K1C;MAP2K7;PAK2;WASF2;MAP2K6;MAP2K3;ACTR2;JUN;MAP3K1;STAT3;CYBA;ARPC4;BAIAP2;PIK3CA;CDK5;RPS6KB1;ARPC3;MYL2;CRK;BCAR1;NOX1
RNA polymerase I promoter opening	19/31	0.000357946	0.00562051	0	0	3.63581	28.8506	HIST1H2BN;HIST2H2AA3;HIST1H2BM;HIST1H2BJ;H2AFZ;HIST1H2BL;HIST1H2BK;H2AFX;H3F3A;HIST1H2AJ;MBD2;HIST2H2BE;HIST2H4A;HIST1H3A;HIST2H3A;UBTF;HIST1H2AD;HIST1H2BH;HIST1H2AB
FSH regulation of apoptosis	106/263	0.000367554	0.00565279	0	0	1.55656	12.3103	IFITM3;ZNF331;POP5;IFITM1;IFITM2;CTNND1;MT1X;MSMO1;CLU;ACTB;ACTG2;ARHGAP35;PPP1CB;RGS5;PPP2R1A;PSMD3;ARL6IP5;MAP3K7;IER3;MAP2K3;RAB2A;CEP135;CSNK2A1;IGFBP4;ALG10;KNSTRN;ALDH3A2;CH25H;PRKAR1A;S100A6;TLN1;GATA6;CREM;THY1;RASAL2;COX7A1;PPP3R1;GRK5;PGK1;ZBED1;HOXC6;RAB4A;IDH1;TFPI2;IGF2;RAB27A;ARPC4;ISG15;ESR1;DAB2;STK25;GNB1;GNAS;DHCR7;RAB5A;CDK16;SERPINA3;DYRK3;ARHGAP1;ATP2A2;VLDLR;YBX3;CX3CL1;PTPR…
Mitochondrial pathway of apoptosis: caspases	38/77	0.000369165	0.00565279	0	0	2.24011	17.7064	RB1;ACHE;ANP32A;ROCK1;HSPB1;XIAP;BCL10;UACA;HSPD1;CASP9;IKBKB;CAPN8;CAPN7;CASP6;CASP3;CHEK1;MAPK1;CAPN1;CYC1;MAP3K7;PAK2;DFFA;GSN;STRADB;AIP;COMMD1;HSPA2;HSPE1;PTK2;RNF41;MZB1;BIRC5;CYCS;BIRC6;PTMA;HSPA1B;BIRC3;HSPA1A
Pathogenic Escherichia coli infection	30/57	0.000371491	0.00565279	0	0	2.55333	20.1662	ITGB1;ROCK1;ROCK2;ARPC1B;LY96;WASL;CLDN1;ACTB;ACTG1;TUBB8;CDC42;TUBA1C;TUBA1B;TUBB6;TUBA1A;TUBB3;NCK1;TUBB;ARPC4;TUBB4B;TUBB4A;RHOA;TUBA4A;TUBB2A;KRT18;CTTN;ARPC3;HCLS1;ARHGEF2;TUBA8
Signaling by NGF	91/221	0.000401286	0.00604386	0	0	1.61295	12.6146	ATF1;GSK3B;CDKN1A;GSK3A;TRIO;RASGRF2;CLTC;RASGRF1;PTEN;IRS2;PIK3CB;AATF;IKBKB;CASP9;PREX1;AKAP13;PPP2R1B;PPP2R1A;CASP3;AKT3;RPS6KA1;MLST8;RAC1;HRAS;MEF2A;DUSP4;PSENEN;VAV3;ARHGEF11;DUSP3;ARHGEF12;PDPK1;ARHGEF17;ARHGEF16;FRS2;SORCS3;DUSP6;RHOA;TIAM2;ADAM17;NGFRAP1;OBSCN;PIK3CA;PRKAR1A;MAPKAPK2;ARHGEF3;ARHGEF2;RAF1;SOS1;UBA52;SQSTM1;CRK;ITGB3BP;RALA;PHLPP1;HDAC1;ADCY4;ITPR2;PIK3R2;ADCY2;ITPR3;PIK3R…
Association of TriC/CCT with target proteins during biosynthesis	18/29	0.000410267	0.0061167	0	0	3.75724	29.3016	CCT3;NOP56;ARFGEF2;CCT2;FBXW5;FBXW7;USP11;FBXW9;CCT6A;AP3M1;KIF13A;TCP1;LONP2;SKIV2L;KIFC3;CCT7;CCT5;CCT4
Signaling by ERBB4	44/93	0.000435064	0.00642154	0	0	2.06502	15.9833	GSK3B;CDKN1A;GSK3A;PHLPP1;PTEN;CUL1;PIK3R1;PSEN1;CASP9;APH1A;APH1B;UBB;ERBB4;AKT3;UBC;MLST8;MAPK1;RICTOR;RPS27A;HRAS;SKP1;PSENEN;PDPK1;BAD;WWP1;PTPN11;ESR1;MTOR;RBX1;GFAP;ADAM17;ITCH;PIK3CA;NRG4;NEDD4;CDK1;MDM2;PGR;KRAS;TAB2;RAF1;SOS1;UBA52;HBEGF
Endosomal/vacuolar pathway	8/9	0.000475913	0.00688673	0	0	18.3516	140.395	HLA-B;LNPEP;HLA-A;HLA-F;B2M;HLA-G;CTSS;HLA-E
Folding of actin by CCT/TriC	8/9	0.000475913	0.00688673	0	0	18.3516	140.395	CCT3;CCT6A;CCT2;TCP1;CCT7;ACTB;CCT5;CCT4
N-glycan biosynthesis	26/48	0.000502778	0.00720486	0	0	2.715	20.6214	DPAGT1;B4GALT3;B4GALT1;RPN2;TUSC3;GANAB;MAN2A2;MAN1A2;MAN2A1;MGAT1;ST6GAL1;ALG5;ALG14;ALG2;ALG13;ALG3;MOGS;ALG1;ALG10;DDOST;DPM1;DPM2;DPM3;DAD1;RFT1;STT3B
Systemic lupus erythematosus	61/139	0.000510984	0.00725205	0	0	1.79978	13.6409	HIST2H2AA3;CD40;HIST2H2AA4;HIST2H2AB;TNF;C8A;SNRPD1;HIST1H2AE;HIST1H2AD;HIST1H2AG;SNRPD3;HIST1H2AB;HLA-DPA1;HIST1H2AM;HIST1H2AL;HIST1H2AI;H2AFY;H2AFZ;HIST1H2AK;HIST1H2AJ;H2AFX;ACTN4;HIST2H2BF;HIST2H2BE;HIST2H3A;IFNG;HIST1H2BF;HIST1H2BH;HIST1H2BG;HIST2H3D;HIST2H3C;HLA-DQB1;HIST1H2BN;C1QA;HIST1H2BM;HIST1H3J;HIST1H2BJ;HIST1H2BL;HIST1H2BK;TROVE2;HIST2H4A;HLA-DMA;HIST1H3A;HIST2H4B;HLA-DMB;HIST1H3F;HIS…
Signaling by NOTCH1	36/73	0.000530127	0.00745207	0	0	2.2365	16.8686	MAML2;MAML1;HDAC1;CUL1;ARRB2;PSEN1;DTX4;HDAC8;HDAC9;HIF1A;APH1A;APH1B;HEY1;UBB;UBC;EP300;HES1;RPS27A;SKP1;PSENEN;TLE4;TLE3;TLE2;CREBBP;TLE1;JAG1;FBXW7;RBX1;NCOR2;CDK8;ADAM17;ITCH;TBL1XR1;NUMB;CNTN1;UBA52
Messenger RNA splicing: major pathway	34/68	0.000543998	0.00757491	0	0	2.29836	17.2758	RBM8A;SF3B6;HNRNPU;HNRNPR;U2AF1;YBX1;PABPN1;CLP1;U2AF2;MAGOH;PCBP2;HNRNPA1;HNRNPA0;HNRNPA3;CPSF1;ALYREF;SMC1A;SRRM1;NUDT21;HNRNPK;PHF5A;HNRNPH1;HNRNPF;HNRNPA2B1;SRSF2;HNRNPD;SRSF3;HNRNPH2;SNRPA1;SRSF4;SRSF5;HNRNPC;SRSF7;RBMX
Signaling events mediated by PRL	15/23	0.000589619	0.00813344	0	0	4.30396	32.0044	ITGB1;CDKN1A;ROCK1;ITGA1;RABGGTB;RABGGTA;RHOA;CCNA2;PTP4A1;PTP4A2;TUBA1B;CCNE1;MAPK1;RAC1;BCAR1
Lipid and lipoprotein metabolism	182/489	0.000631298	0.00862774	0	0	1.3693	10.0886	SCARB1;CERK;PITPNB;MSMO1;GBA3;PPP1CB;FADS2;COL4A3BP;STS;SCP2;PIP4K2A;EP300;HADH;FADS1;TPTE2;MED1;PRKAB2;CPT1A;PHYH;DGAT2;DGAT1;ACSL5;CEL;ACSL3;MED6;PISD;CYP27A1;CYP39A1;TIAM2;CH25H;GNPAT;PLA2G16;TBL1XR1;FAR1;SLC27A2;CSNK1G2;ABCG1;PNLIP;CDS1;MTMR1;CETP;IDI1;MTMR2;MTMR3;SAR1B;PIK3R2;PIK3R1;MTMR4;PLD1;MTMR6;ACAT1;UGCG;NEU4;PTDSS1;SGPL1;EBP;RDH11;INPP5D;MED31;PMVK;NEU1;INPP5J;HACL1;PIP5K1C;KDSR;A2M;F…
Glutathione metabolism	27/51	0.000637573	0.00863356	0	0	2.58452	19.0165	GSTP1;MGST3;ODC1;MGST1;MGST2;TXNDC12;SRM;GSTM4;GSTK1;GSTM3;G6PD;GGT7;GSTM2;GPX1;GSTM1;RRM2;GPX4;GPX3;GSTO1;GSS;IDH1;GPX5;IDH2;GPX7;PGD;GSTA4;LAP3
Thyroid-stimulating hormone signaling pathway	33/66	0.000652551	0.00875605	0	0	2.29815	16.856	RB1;ADCY2;PIK3R2;PIK3R1;PLD1;GNAI1;GNAI2;MYL12B;GNA13;RAP1A;RPS6KA1;MAPK1;HRAS;TSHB;MAP2K6;MAP2K3;JUN;PDPK1;STAT1;RPS6;STAT3;BRAF;MTOR;PIK3CA;RPS6KB1;CCNE1;CDK4;APEX1;GNAQ;GNB1;GNAS;PLCB1;RAF1
p75 neurotrophin receptor-mediated signaling	55/124	0.000687635	0.00914369	0	0	1.83378	13.3541	APP;TRIO;RASGRF2;RASGRF1;AATF;CASP9;IKBKB;PREX1;AKAP13;CASP6;CASP3;RAC1;ARHGEF11;PSENEN;VAV3;ARHGEF12;ARHGEF17;ARHGEF16;SORCS3;RHOA;TIAM2;ADAM17;NGFRAP1;OBSCN;PIK3CA;ARHGEF3;ARHGEF2;SOS1;SQSTM1;UBA52;ITGB3BP;BIRC3;RTN4R;ZNF274;HDAC1;XIAP;PIK3R1;PSEN1;RTN4;FGD1;RELA;APH1A;ABR;MAPK9;APH1B;UBB;UBC;RPS27A;NTRK1;LINGO1;BAD;SORT1;NFKBIA;CYCS;MYD88
Eukaryotic protein translation	12/17	0.000742278	0.00978216	0	0	5.50754	39.6861	EIF4A2;EIF4A1;EIF5B;EIF2S3;EIF5;EIF6;EEF2;EIF2S2;EIF4G3;EIF3A;EIF4G2;EIF1
Chromosome maintenance	47/103	0.000774365	0.0101147	0	0	1.93008	13.8261	HIST2H2AA3;HIST1H2BN;DIDO1;HIST1H2BM;FEN1;PCNA;HIST1H2BJ;HIST1H2BL;PRIM1;HIST1H2BK;RSF1;SMC3;CENPA;SYNE1;POLD4;MIS18BP1;LMNA;POLD2;HIST1H2AD;RBBP7;POLE;HIST1H2AB;RFC5;NPM1;UBE2I;RFC4;RFC1;H2AFZ;HIST1H2AJ;TINF2;H2AFX;SMARCA5;TEX12;HSPA2;SMC1A;TERF2;HIST2H2BE;STAG1;STAG2;CENPH;CENPI;RPA3;POT1;HIST1H2BH;CENPO;SYCP3;ITGB3BP
EGF receptor (ErbB1) signaling pathway	20/35	0.000901409	0.0116709	0	0	3.06158	21.4664	PTPN1;GSN;STAT1;STAT3;PIK3R2;PTPN11;PIK3CB;PIK3R1;WASL;GNAI1;PTK2;PIK3CA;RASA1;MAPK1;KRAS;PIP5K1C;SOS1;TLN1;HRAS;NCK1
Regulation of transcription by NOTCH1 intracellular domain	25/47	0.000914913	0.0117125	0	0	2.61014	18.2623	MAML2;HDAC1;MAML1;CUL1;HDAC8;HDAC9;HIF1A;HEY1;UBB;UBC;EP300;HES1;RPS27A;SKP1;TLE4;TLE3;CREBBP;TLE2;TLE1;FBXW7;RBX1;NCOR2;CDK8;TBL1XR1;UBA52
RNA polymerase II transcription	46/101	0.000920498	0.0117125	0	0	1.92318	13.4442	SLBP;GTF2A1;GTF2A2;CCNT2;CCNT1;RBM8A;RNMT;GTF2B;TAF9;SUPT4H1;U2AF1;GTF2E2;LSM10;PABPN1;CLP1;U2AF2;POLR2C;MAGOH;POLR2D;TCEB2;TCEB1;SNRPD3;POLR2H;POLR2I;POLR2J;POLR2K;NELFE;POLR2L;CPSF1;TAF13;ALYREF;TAF10;GTF2H2;SUPT5H;GTF2H4;SRRM1;NUDT21;SRSF2;SRSF3;SNRPE;SRSF4;SNRPF;SRSF5;TAF4;SRSF7;TAF1
Colorectal cancer	31/62	0.000939977	0.0118582	0	0	2.29772	16.0143	GSK3B;ARAF;PIK3R2;PIK3CB;PIK3R1;CASP9;MAPK9;CCND1;CASP3;AKT3;RAC2;RAC3;MAPK1;RAC1;APC2;TCF7L2;JUN;SMAD4;TCF7L1;TGFB2;SMAD3;DCC;BAD;BRAF;RHOA;PIK3CA;APC;BIRC5;CYCS;KRAS;RAF1
Interleukin-2 signaling pathway	299/847	0.000954364	0.0119376	0	0	1.26301	8.78356	EPHB6;IFITM3;APP;ARL6IP1;SERPINE1;IFIT1;ACTB;ICAM1;TIAL1;PREX1;MT2A;AKT3;NAMPT;KDR;TNFSF10;FAM53B;IER3;TKTL1;CSNK2A1;RPL21;COG4;FLT3LG;ANK2;ZNF12;RUFY1;MTHFD2;MALL;ULK2;MT1H;TAGLN2;MT1B;ATF4;MT1E;MACF1;ABCB1;ZNF394;MGST1;NOLC1;PIK3R2;PIK3R1;TXN;GNG10;RDH11;CHST12;INPP5D;HLTF;ZNF267;S100A11;CCR1;CDK17;TRAP1;JUN;XBP1;YES1;JUND;ST13;SLC35E1;FUCA1;SH2D1A;PA2G4;LARP4;EIF1;GADD45G;MLLT10;SQLE;PKIA;ID2;…
BDNF signaling pathway	103/261	0.00104079	0.0129092	0	0	1.50207	10.3159	IFITM2;SERPINE1;CLU;RIMS3;PPP2R1B;PEG10;SLC39A7;PTRF;IER2;FADS1;DDX17;PPP1R16B;IGFBP4;RPS6;RPSA;ANK3;FNDC3A;TXNIP;ADNP;SRSF5;ABCB1;IGSF3;INSIG1;STIP1;NUAK1;PTDSS1;SERPINH1;SSR1;S100A11;S100A10;MAP2K6;HSPA8;JUN;XBP1;GADD45A;TFPI2;IGF2;NR1D2;PHKB;BMX;GNG11;BMP2;P4HA1;ID2;HYOU1;CD200;BTG2;CDKN1A;DOCK4;NUMA1;ARPC1B;HSPB1;RND3;HERPUD1;TIMP1;UPP1;CLIC1;DUSP4;IL11;TMED9;ATP6AP1;DUSP1;TUBB;ITGA2;EMP3;SLC…
MicroRNA regulation of DNA damage response	34/70	0.00105355	0.0129587	0	0	2.17036	14.8791	RB1;CDKN1A;MCM7;CASP9;TP53AIP1;CCNB2;CCNB1;CCND2;CCND1;CASP3;CHEK1;TLK2;TLK1;BID;RFC1;GADD45B;GADD45A;H2AFX;CDC25C;SMC1A;PML;DDB2;GADD45G;RAD50;RAD51;CDK5;CCNE1;FANCD2;CDK4;CDK1;MDM2;CYCS;ATM;RAD1
RAGE pathway	30/60	0.00112882	0.0137697	0	0	2.2975	15.5922	ITGB1;CXCL8;SERPINE1;ICAM2;PDGFB;HMGCR;TNF;RELA;ICAM1;GJA1;CASP3;COX2;SCAP;TIMP1;LDLR;EDN1;ANGPT2;MMP1;FN1;CYBA;SELE;VEGFA;BMP4;CLDN5;FABP4;ID2;ID1;ID3;ITGA5;ABCG1
Focal adhesion	93/233	0.00116776	0.014128	0	0	1.53006	10.3319	ITGB1;MYLK2;GSK3B;FLT1;ITGAM;FLT4;RASGRF1;ARAF;PTEN;LAMC1;PIK3CB;ARHGAP5;ACTB;ARHGAP35;ACTG1;PPP1CB;CCND2;CCND1;AKT3;KDR;RAC2;RAC3;TNR;ITGAV;RAC1;CAPN1;PELO;HRAS;VAV3;MAP2K3;PPP1R12A;VWF;PDPK1;ITGA2;ITGA1;ACTN4;RHOA;FGR;MYL6;COL4A2;PIK3CA;MYL2;COL6A2;COL6A1;ITGA7;ITGA6;ITGA5;TLN1;RAF1;SOS1;CRK;DOCK1;BIRC3;LAMA2;ROCK1;ROCK2;COL11A1;LAMA4;PDGFB;XIAP;PIK3R2;PIK3R1;MYL12A;MYL12B;THBS3;CDC42;MAPK9;REL…
Mitotic prometaphase	23/43	0.00131406	0.0157688	0	0	2.64097	17.5219	RANBP2;RCC2;PLK1;SMC3;SMC1A;CENPA;CKAP5;CDC20;CLIP1;KIF18A;STAG1;XPO1;RPS27;STAG2;KIF2A;TAOK1;KIF2C;MAPRE1;BUB1;CLASP1;CLASP2;NDEL1;PAFAH1B1
Fatty acid elongation in mitochondria	7/8	0.00140136	0.0166807	0	0	16.055	105.487	HADHB;HADHA;ACAA2;ECHS1;PPT1;PPT2;HADH
Integrin signaling pathway	65/155	0.00145841	0.017221	0	0	1.66176	10.852	ITGB1;ARPC1B;PTEN;TSPAN12;ACTB;ACTG2;ARHGAP35;ACTG1;CAPN8;CAPN7;AKT3;RAC2;RAC3;CAPN1;RAC1;HRAS;MAP2K3;RHOG;RHOA;ARHGAP10;PIK3CA;RAF1;TLN1;SOS1;CRK;DOCK1;ITGB3BP;RHOQ;LRPAP1;RALA;ROCK1;ROCK2;NOLC1;NEDD9;ASAP1;MYL12A;MYL12B;CDC42;MAPK9;RAP1A;RHOT1;MAPK7;RRAS;TSPAN6;TSPAN7;PLCG2;TSPAN4;TSPAN5;MAPK1;TSPAN3;MAP2K6;VASP;JUN;MAP3K1;CDKN2A;TNK2;ARPC4;BRAF;PTK2;TSPAN14;TSPAN13;ARPC3;ZYX;KRAS;BCAR1
Semaphorin interactions	32/66	0.00151578	0.0176366	0	0	2.16245	14.0382	ITGB1;SEMA5A;GSK3B;NRP1;SEMA7A;HSP90AB1;PLXND1;ROCK1;ROCK2;CRMP1;ARHGAP35;MYL12B;CDC42;RRAS;RAC2;RAC1;PIP5K1C;PAK2;ARHGEF11;FARP2;SEMA4A;ARHGEF12;SEMA6A;SEMA4D;ITGA1;RHOG;RHOA;MYL6;CDK5;FES;MYH9;TLN1
Membrane trafficking	57/133	0.00151751	0.0176366	0	0	1.72512	11.1972	CLTC;AP4E1;GJA1;FTH1;AP1S2;AP1S1;GJA9;AP3S1;SEC13;AP1B1;VPS37B;ARFGAP1;COPZ1;HGS;DNAJC6;CHMP4C;CHMP4B;PREB;DNASE2;UBA52;VPS25;CHMP7;VPS28;FTL;CHMP5;SAR1B;UBB;BLOC1S1;MYO6;UBC;SNX9;STX4;RPS27A;SNX5;AP1M1;SEC31A;TXNDC5;HSPA8;SEC24B;SEC24A;SORT1;VTA1;DTNBP1;HIP1R;AP4B1;IGF2R;ARCN1;TJP1;DAB2;NECAP1;CPD;GJB6;CHMP2B;CHMP2A;SEC24D;COPE;PICALM
Polo-like kinase 1 (PLK1) pathway	24/46	0.00163755	0.018883	0	0	2.50532	16.0705	RAB1A;PPP1R12A;ROCK2;PLK1;CDC25C;TUBG1;NDC80;RHOA;AURKA;CDC20;GOLGA2;PPP1CB;TPX2;CCNB1;FZR1;STAG2;KIF2A;PPP2R1A;PRC1;GORASP1;CDK1;KIF20A;BUB1;TPT1
Kinesins	16/27	0.00174009	0.0199099	0	0	3.33866	21.2133	KIF23;KIF11;KLC1;KIF15;KIF18A;KIF9;KLC2;KIF3B;RACGAP1;KIF2A;KIF3A;KIFC1;KIF5B;KIF2C;KIF3C;KIF20A
G alpha (12/13) signaling events	36/77	0.00180563	0.0205008	0	0	2.01772	12.7457	TRIO;ROCK1;ROCK2;RASGRF2;RASGRF1;PIK3R2;PIK3R1;ADRA1B;FGD1;CDC42;GNA13;AKAP13;PREX1;ABR;GNG10;GNG5;GNG7;RAC2;RAC1;ARHGEF11;VAV3;ARHGEF12;ARHGEF17;ARHGEF16;RHOG;GNG11;RHOA;GNG13;TIAM2;OBSCN;PIK3CA;GNB1;ARHGEF3;GNB4;ARHGEF2;SOS1
DCC-mediated attractive signaling	10/14	0.00184994	0.0208436	0	0	5.73554	36.0915	CDC42;ABLIM1;TRIO;DCC;WASL;RAC1;NTN1;DOCK1;PTK2;NCK1
G13 signaling pathway	21/39	0.00188904	0.021123	0	0	2.67875	16.8003	ROCK1;ROCK2;TNK2;PIK3R2;IQGAP1;PIK3CB;WASL;SH3RF1;RHOA;CDC42;GNA13;PPP1CB;DIAPH1;PIK3CA;RPS6KB1;CFL2;ARHGDIB;PIP4K2A;RAC1;CALM1;PFN1
Valine, leucine and isoleucine degradation	23/44	0.00196847	0.0218456	0	0	2.51503	15.6699	ACAD8;BCKDHA;MCCC2;ACAA2;ECHS1;BCKDHB;HSD17B10;ACAT2;ACAT1;ALDH3A2;HADHB;HMGCL;HADHA;OXCT1;DBT;PCCB;HADH;BCAT1;ACADS;ALDH7A1;DLD;ALDH9A1;BCAT2
APC/C- and Cdc20-mediated degradation of Nek2A	15/25	0.00203731	0.0222746	0	0	3.44268	21.3312	UBE2C;ANAPC10;CDC20;CCNB1;CDC23;UBB;CDC26;CDC27;UBC;CDC16;CDK1;BUB3;RPS27A;UBA52;MAD2L1
Cellular response to hypoxia	15/25	0.00203731	0.0222746	0	0	3.44268	21.3312	EGLN1;CREBBP;EGLN2;CUL2;HIF3A;HIF1A;RBX1;VEGFA;UBB;UBC;EP300;TCEB2;TCEB1;RPS27A;UBA52
Netrin-mediated signaling events	18/32	0.0020635	0.022395	0	0	2.95148	18.25	TRIO;YES1;MYO10;DCC;UNC5B;CAMK2A;PIK3R1;WASL;NTN1;PTK2;RHOA;CDC42;PIK3CA;MAPK1;RAC1;DOCK1;BCAR1;NCK1
p53 activity regulation	51/118	0.00209908	0.0226149	0	0	1.75027	10.7926	RB1;RPL5;GSK3B;CDKN1A;SERPINE1;PTEN;TP53AIP1;CASP9;CCND2;CCND1;PPP2R4;CASP3;CHEK1;EP300;SKP2;CSNK1G3;USP7;RPL23;SHISA5;CSNK1E;FBXO11;DDB2;CCNA2;CCNE1;CSNK1G2;PCNA;EI24;RPL11;PPM1D;CCNB2;MAPK9;CCNB1;SMYD2;BID;CREBBP;RRM2;GADD45B;GADD45A;CDKN2A;HUWE1;GADD45G;HIPK2;TP53I3;CDK4;CCNG2;CDK1;MDM2;CYCS;PIN1;ATM;MDM4
PI3K/AKT activation	20/37	0.00226566	0.0242327	0	0	2.70101	16.4488	NTRK1;GSK3B;CDKN1A;GSK3A;PHLPP1;BAD;PDPK1;PTEN;IRS2;PIK3R2;PIK3CB;PIK3R1;MTOR;RHOA;CASP9;PIK3CA;AKT3;MLST8;MDM2;RICTOR
Pancreatic cancer	33/70	0.00232016	0.0246297	0	0	2.04911	12.4301	RB1;RALA;ARAF;TGFA;PIK3R2;PIK3CB;PIK3R1;PLD1;RELA;CASP9;IKBKB;CDC42;MAPK9;CCND1;AKT3;RAC2;RAC3;MAPK1;RAC1;SMAD4;TGFB2;SMAD3;BAD;CDKN2A;STAT1;STAT3;BRAF;VEGFA;RAD51;PIK3CA;CDK4;KRAS;RAF1
mTOR signaling pathway	49/113	0.00233615	0.0246297	0	0	1.76025	10.6658	EIF4A2;EIF4A1;CAB39L;PTEN;PIK3CB;IKBKB;STK11;RB1CC1;AKT3;RPS6KA1;MLST8;RAC1;HRAS;PDK2;YWHAH;SREBF1;PDPK1;RPS6;TSC1;RHOA;CLIP1;PIK3CA;CCNE1;ULK3;ULK2;RAF1;SGK1;PRKAA1;RRN3;CAB39;PIK3R2;PIK3R1;PLD1;HIF1A;MKNK1;MAPK1;RICTOR;BRAF;EEF2;MTOR;PML;VEGFA;RPS6KB1;RHEB;CYCS;KRAS;EIF4G3;EIF4G2;EIF3A
Hexose transport	22/42	0.00236744	0.0246868	0	0	2.52573	15.2704	RANBP2;NUP205;POM121;NUP107;SEH1L;NUP188;NUP155;NUP153;NUP160;HK1;NUP93;G6PC3;NUP85;NUP50;TPR;NUP35;NUP88;NUP54;NUP98;NUPL2;RAE1;NUP37
Collagen binding in corneal epithelia mediated by Erk and PI-3 Kinase	14/23	0.00237501	0.0246868	0	0	3.56985	21.5717	ITGB1;GSN;ROCK1;PIK3R1;ARHGAP5;RHOA;DIAPH1;PIK3CA;MYL2;MAPK1;PFN1;RAF1;TLN1;HRAS
Neurophilin interactions with VEGF and VEGF receptor	5/5	0.00258697	0.0267019	0	0	69615	414715	NRP1;NRP2;FLT1;KDR;VEGFA
Endocytosis	80/201	0.00269902	0.0276649	0	0	1.52164	9.00031	FLT1;ZFYVE9;SH3KBP1;CLTC;CBLB;ARRB2;EEA1;KDR;LDLRAP1;HRAS;SH3GL1;PSD;SH3GLB1;PDCD6IP;HLA-B;ARAP2;IZUMO1R;HLA-A;ARAP1;VPS37B;HLA-F;ARFGAP3;HLA-G;RHOA;ARFGAP1;EPN1;HLA-E;RNF41;EPN2;RUFY1;RABEP1;HGS;DNAJC6;PARD3;CHMP4C;CHMP4B;VPS25;VPS28;CHMP5;ASAP3;ADRB1;ASAP1;PLD1;CBL;CDC42;CXCR1;GRK5;GRK4;ERBB4;PIP5K1C;RAB11FIP2;LDLR;NTRK1;HSPA8;RAB4A;TGFB2;SMAD3;SMURF2;VTA1;IQSEC3;WWP1;AP2B1;HSPA2;SMAD6;RAB11A;P…
Meiotic synapsis	27/55	0.00274798	0.0278312	0	0	2.21467	13.0597	HIST2H2AA3;HIST1H2BN;DIDO1;HIST1H2BM;HIST1H2BJ;HIST1H2BL;HIST1H2BK;SMC3;SYNE1;LMNA;HIST1H2AD;HIST1H2AB;UBE2I;H2AFZ;H2AFX;HIST1H2AJ;TINF2;TEX12;HSPA2;SMC1A;TERF2;HIST2H2BE;STAG1;STAG2;POT1;HIST1H2BH;SYCP3
Y branching of actin filaments	13/21	0.00275295	0.0278312	0	0	3.72887	21.982	NTRK1;ACTR2;ARPC1B;ARPC4;WASL;CDC42;ARPC3;PIR;ABL2;RAC1;WASF2;WASF3;NCK1
Deposition of new CENP-A-containing nucleosomes at the centromere	23/45	0.00288024	0.02892	0	0	2.40054	14.0429	HIST1H2BN;HIST2H2AA3;HIST1H2BM;NPM1;HIST1H2BJ;H2AFZ;HIST1H2BL;HIST1H2BK;H2AFX;HIST1H2AJ;SMARCA5;RSF1;CENPA;HIST2H2BE;CENPH;MIS18BP1;CENPI;HIST1H2AD;HIST1H2BH;RBBP7;CENPO;ITGB3BP;HIST1H2AB
Developmental biology	154/420	0.00311237	0.0310396	0	0	1.33491	7.70561	SEMA5A;TRIO;PLXND1;ARHGAP39;TNF;ARHGAP35;RPS6KA4;ALCAM;AKT3;RPS6KA1;EP300;EPHB2;CER1;SCN1A;MEF2A;MED1;MEF2B;SEMA6A;CSNK2A1;UNC5B;CSNK2A2;ANK2;ANK3;MED6;MYL6;COL4A2;TBL1XR1;SCN8A;CSNK2B;COL4A5;PFN1;TLN1;RAF1;PFN2;SEMA7A;CACNA1H;MYL12B;STIP1;RRAS;MED31;ST8SIA4;ABL2;PIP5K1C;NKX6-1;SRGAP2;SCN3B;SRGAP1;SPTBN1;MAP2K6;VASP;PRNP;CDK19;CREBBP;SMAD4;SMAD3;SIAH2;RDX;MSN;PTK2;DRAP1;CDK8;DLG1;CDK5;CDK4;PTPRA;…
Cell cycle progression regulation by PLK3	12/19	0.00316658	0.0313683	0	0	3.93339	22.6371	CASP9;PLK3;CCNB1;CASP6;CASP3;RASGRF1;CHEK1;CDK1;CYCS;ATM;CDC25C;YWHAH
Rho GTPase cycle	52/123	0.00336022	0.0330646	0	0	1.68384	9.59072	ARHGAP11A;ARHGAP11B;TRIO;RASGRF2;RASGRF1;ARHGAP1;ARHGAP39;ARHGAP5;ARHGAP36;ARHGAP35;SYDE2;PREX1;AKAP13;ARHGAP40;ARHGDIB;RAC2;RAC3;RAC1;ARHGEF11;VAV3;ARHGEF12;ARHGEF17;ARHGEF16;ARAP2;RHOG;ARAP1;RHOA;TIAM2;ARHGAP10;OBSCN;ARHGEF3;ARHGEF2;SOS1;RHOQ;ARHGAP18;PIK3R2;FGD1;ARHGAP12;RHOBTB2;CDC42;ABR;RHOT1;RACGAP1;CHN1;G3BP2;A2M;SRGAP2;SRGAP1;ARHGAP29;MYO9B;ARHGAP25;MYO9A
Phagosome	63/154	0.00345004	0.0337236	0	0	1.59228	9.02725	ITGB1;SCARB1;ITGAM;CLEC4M;TCIRG1;ACTB;CTSS;ACTG1;TUBB8;EEA1;MRC2;TUBA1C;TUBB6;TUBA1B;TUBA1A;TUBB3;CTSL;SEC61G;ITGAV;RAC1;SEC61B;ATP6V1E1;HLA-DPA1;ATP6V1G1;ATP6V0B;ATP6V0E1;ATP6AP1;ITGA2;TUBB;STX7;HLA-B;TAP2;CYBA;HLA-A;HLA-F;HLA-G;TUBA4A;HLA-E;DYNC1LI2;TUBB2A;HGS;CANX;ITGA5;HLA-DQB1;VAMP3;ATP6V1A;COLEC12;THBS3;HLA-DMA;HLA-DMB;ATP6V0A4;ATP6V0E2;ATP6V1C1;DYNC1I1;DYNC1H1;TUBB4B;TUBB4A;MARCO;HLA-DPB1;…
Post-chaperonin tubulin folding pathway	11/17	0.00360379	0.0349947	0	0	4.20615	23.6628	TUBA1C;TUBA1B;TUBB6;TUBA1A;TUBB2A;TUBB3;TBCD;TBCB;TUBB4B;TUBB4A;TUBA4A
NF-kappaB activation by non-typeable Hemophilus influenzae	17/31	0.00391302	0.0377491	0	0	2.78705	15.4498	MAP2K3;CREBBP;SMAD4;TGFB2;CXCL8;SMAD3;DUSP1;NR3C1;TNF;RELA;IKBKB;NFKBIA;EP300;MAP3K7;MYD88;MAP2K6;MAP4K4
Spliceosomal assembly	10/15	0.00403929	0.0387142	0	0	4.5881	25.2882	SNRPD2;SNRPD1;U2AF2;SRSF2;U2AF1;SNRPA1;SNRPE;SNRPD3;SNRPF;SNRPC
Meiosis	37/83	0.00434855	0.0414094	0	0	1.848	10.0493	HIST2H2AA3;HIST1H2BN;DIDO1;HIST1H2BM;HIST1H2BJ;HIST1H2BL;HIST1H2BK;SMC3;SYNE1;HIST1H3A;LMNA;HIST1H2AD;HIST1H2AB;UBE2I;H2AFZ;H2AFX;HIST1H2AJ;TINF2;H3F3A;TEX12;MND1;HSPA2;SMC1A;TERF2;HIST2H2BE;RAD50;STAG1;HIST2H3A;RAD51C;RAD51;STAG2;CDK4;RPA3;POT1;HIST1H2BH;ATM;SYCP3
N-glycan trimming in the ER and calnexin/calreticulin cycle	9/13	0.0044253	0.0418701	0	0	5.16113	27.9755	EDEM3;PDIA3;GANAB;PRKCSH;EDEM2;CANX;MOGS;UGGT2;UGGT1
COPII-mediated vesicle transport	7/9	0.00464044	0.0435915	0	0	8.02694	43.1283	SEC13;SEC24B;SEC24A;SAR1B;PREB;SEC24D;SEC31A
Recruitment of NuMA to mitotic centrosomes	8/11	0.00467574	0.0435915	0	0	6.11633	32.8164	CCNB1;NUMA1;TUBGCP2;CDK1;TUBGCP3;TUBG2;TUBGCP4;TUBG1
Influence of Ras and Rho proteins on G1 to S transition	16/29	0.00469584	0.0435915	0	0	2.82462	15.143	RB1;CDKN1A;PDPK1;PIK3R1;RELA;RHOA;IKBKB;NFKBIA;CCND1;PIK3CA;CCNE1;CDK4;MAPK1;RAC1;RAF1;HRAS
Deadenylation-dependent mRNA decay	24/49	0.00479627	0.0439744	0	0	2.20421	11.7703	EIF4A2;EIF4A1;DDX6;CNOT6L;LSM1;LSM4;LSM3;LSM2;EXOSC7;EXOSC5;LSM7;EXOSC4;CNOT7;LSM6;PAN3;XRN1;CNOT1;EXOSC9;RQCD1;PABPC1;CNOT8;DCPS;DCP2;EXOSC1
Peroxisome	35/78	0.00479666	0.0439744	0	0	1.86986	9.98473	ABCD4;MVK;ECI2;PEX11B;HSD17B4;HMGCL;SCP2;PRDX1;PMVK;HACL1;MPV17;DECR2;PEX16;GSTK1;PHYH;NOS2;IDH1;ECH1;IDH2;ACSL5;PEX2;ACSL3;SOD2;PEX13;PEX14;DHRS4;SOD1;GNPAT;AMACR;ACOX1;PXMP2;PXMP4;FAR1;AGXT;SLC27A2
CCR3 signaling in eosinophils	13/22	0.00486863	0.0443586	0	0	3.31431	17.6485	ROCK2;PIK3C2G;PTK2;RHOA;GNAQ;MYL2;GNAS;MAPK1;PLCB1;RAF1;HRAS;NOX1;DECR1
Antigen processing and presentation	36/81	0.00516484	0.0467687	0	0	1.83784	9.67786	HSP90AB1;IFI30;TNF;CTSS;KIR2DL4;PSMB6;HLA-DMA;HLA-DMB;PSMB5;CTSL;B2M;HLA-DPA1;PDIA3;HSPA8;NFYC;HLA-B;TAP2;RFXANK;HLA-A;HSPA2;HLA-F;HLA-G;PSMB8;HLA-E;TAPBP;PSMB9;IFNG;CANX;RFX5;RFXAP;PSME1;HLA-DPB1;HSPA1B;HLA-DQB1;HSPA1A;LGMN
TNF/stress-related signaling	15/27	0.00563519	0.0504093	0	0	2.86848	14.8551	ATF1;MAP2K3;MAP4K2;JUN;MAP3K1;TANK;TNF;RELA;TNFRSF1A;IKBKB;NFKBIA;RIPK1;MAP2K7;MAP2K6;MAP4K4
eIF4E and p70 S6 kinase regulation	15/27	0.00563519	0.0504093	0	0	2.86848	14.8551	EIF4A2;EIF4A1;PDPK1;PTEN;PIK3R1;MTOR;PIK3CA;RPS6KB1;PSMC4;MKNK1;MAPK1;PABPC1;EIF4G3;PDK2;EIF4G2
VEGF, hypoxia, and angiogenesis	21/42	0.00600423	0.0527947	0	0	2.29557	11.7425	EIF2B4;EIF2B3;FLT1;EIF2B2;PDPK1;FLT4;PIK3R1;EIF2S2;ELAVL1;HIF1A;KNG1;PTK2;EIF1;VEGFA;EIF2S3;PIK3CA;KDR;EIF2B1;SOS1;HRAS;BCAR1
Packaging of telomere ends	17/32	0.00600915	0.0527947	0	0	2.60106	13.303	HIST1H2BN;HIST2H2AA3;HIST1H2BM;HIST1H2BJ;H2AFZ;HIST1H2BL;HIST1H2BK;H2AFX;HIST1H2AJ;TINF2;TERF2;HIST2H2BE;HIST2H4A;HIST1H2AD;POT1;HIST1H2BH;HIST1H2AB
Signaling by Robo receptor	17/32	0.00600915	0.0527947	0	0	2.60106	13.303	ROBO2;VASP;ARHGAP39;CDC42;ENAH;PAK7;ABL2;RAC1;SRGAP2;PFN1;SOS1;PAK2;SRGAP1;CLASP1;CLASP2;NCK1;PFN2
p73 transcription factor network	35/79	0.00613352	0.0535685	0	0	1.82723	9.30788	RB1;CDKN1A;SERPINE1;RELA;TP53AIP1;CCNB1;TUBA1A;CHEK1;PEA15;EP300;FLOT2;BUB3;BUB1;DEDD;NTRK1;PLK3;GDF15;PLK1;AEN;UBE4B;SIRT1;GNB2L1;PML;CCNA2;ITCH;RAD51;TP53I3;WT1;CDK1;MDM2;NDUFS2;PIN1;HAGH;PFDN5;ADA
Nucleotide di- and triphosphate biosynthesis and interconversion	11/18	0.00673546	0.0581376	0	0	3.60501	18.0264	DTYMK;RRM2;GUK1;TXNRD1;AK1;AK2;CMPK1;GLRX;NME4;TXN;NME1
Transcriptional activity regulation by PML	11/18	0.00673546	0.0581376	0	0	3.60501	18.0264	RB1;CREBBP;UBE2I;RARA;TNFRSF1B;SIRT1;TNF;HRAS;PML;PRAM1;TNFRSF1A
TNFR1 signaling pathway	16/30	0.00725466	0.0618972	0	0	2.62267	12.9196	RB1;DFFA;JUN;MAP3K1;PRKDC;TNF;TNFRSF1A;CASP3;ARHGDIB;LMNA;MADD;RIPK1;FADD;MAP3K7;PAK2;BIRC3
Pyruvate metabolism and citric acid (TCA) cycle	20/40	0.00725489	0.0618972	0	0	2.29536	11.3071	FH;PDHA1;SLC16A1;IDH3G;MDH2;IDH1;IDH2;PDHB;SDHD;SDHB;CS;PDP1;OGDH;PDK3;SUCLG1;ACO2;L2HGDH;SLC16A3;DLD;PDK2
Tight junction	54/133	0.00766215	0.0643789	0	0	1.57114	7.65376	PTEN;PPP2R2A;F11R;CLDN1;YBX3;ACTB;ACTG1;PPP2R1B;PPP2R1A;AKT3;CLDN23;HRAS;MAGI1;PRKCH;CSNK2A1;MAGI3;CSNK2A2;CASK;RRAS2;ACTN4;ASH1L;RHOA;CLDN11;CLDN5;CLDN10;MYH2;CTTN;MYL2;PARD3;CSNK2B;CLDN18;EXOC3;HCLS1;MYH9;LLGL1;MYH6;EPB41;MLLT4;MYL12A;GNAI1;MYL12B;GNAI2;CDC42;RRAS;EPB41L2;CTNNA1;MYL10;YES1;CGN;TJAP1;TJP1;CDK4;RAB13;KRAS
Acetylation and deacetylation of RelA in the nucleus	10/16	0.00785108	0.0643789	0	0	3.82314	18.5312	IKBKB;NFKBIA;CREBBP;EP300;RIPK1;FADD;TNFRSF1B;TNF;RELA;TNFRSF1A
B cell survival pathway	10/16	0.00785108	0.0643789	0	0	3.82314	18.5312	ITGB1;JUND;PIK3CA;PDPK1;CASP3;XIAP;BIRC5;PIK3R1;MTOR;CCT4
Cell death signaling by NRIF in the nucleus	10/16	0.00785108	0.0643789	0	0	3.82314	18.5312	PSENEN;APH1A;APH1B;UBB;UBC;PSEN1;RPS27A;SQSTM1;UBA52;ITGB3BP
Other glycan degradation	10/16	0.00785108	0.0643789	0	0	3.82314	18.5312	MANBA;NEU4;MAN2B2;FUCA1;HEXB;FUCA2;HEXA;NEU1;MAN2B1;AGA
PI3K subunit p85 role in regulation of actin organization and cell migration	10/16	0.00785108	0.0643789	0	0	3.82314	18.5312	CDC42;ACTR2;PIK3CA;ARPC3;ARPC1B;ARPC4;PIK3R1;WASL;RAC1;RHOA
Sprouty regulation of FGF signaling	10/16	0.00785108	0.0643789	0	0	3.82314	18.5312	UBB;PPP2R1A;MKNK1;UBC;MAPK1;BRAF;PTPN11;CBL;RPS27A;UBA52
DNA repair	44/105	0.00795197	0.0648459	0	0	1.65735	8.01221	FEN1;PCNA;PRKDC;XPA;ALKBH3;ALKBH2;POLD4;UBB;POLR2C;UBC;POLD2;POLR2D;TP53BP1;POLR2H;POLR2I;RPS27A;POLE;POLR2J;POLR2K;POLR2L;RFC5;MBD4;RFC4;RFC1;XRCC5;MGMT;H2AFX;REV1;XRCC1;GTF2H2;PALB2;RAD23B;GTF2H4;DDB2;SMUG1;RAD50;RAD51;FANCD2;UBE2T;APEX1;ERCC1;RPA3;ATM;UBA52
Downregulation of SMAD2/3-SMAD4 transcriptional activity	13/23	0.00811033	0.0657739	0	0	2.98267	14.3604	SMAD4;SMAD3;SMURF2;HDAC1;USP9X;NCOR2;PPM1A;UBB;UBC;RPS27A;SKIL;UBA52;TRIM33
Interferon alpha/beta signaling	29/64	0.00826009	0.0666224	0	0	1.90265	9.1257	IFITM3;IFITM1;IFITM2;IFNA2;IFI6;ADAR;IFIT1;USP18;IFIT2;GBP2;IFNA21;IP6K2;PTPN1;STAT1;MX2;STAT2;MX1;HLA-B;ISG15;PTPN11;HLA-A;HLA-F;HLA-G;PSMB8;HLA-E;ISG20;OAS1;OAS2;IRF9
Factors involved in megakaryocyte development and platelet production	51/125	0.00839422	0.0673363	0	0	1.5839	7.57138	DOCK5;DOCK4;DOCK9;DOCK7;IFNA2;JMJD1C;HBD;KIF11;KIF15;DOCK10;CAPZB;KIF5B;EP300;RAC1;KIF23;KIF9;HIST2H3A;RAD51C;KIF2A;PRKAR1A;KIFC1;KIF2C;KIF20A;ZFPM2;DOCK1;HDAC1;GATA6;AK3;GATA5;KLC1;CDC42;HIST1H3A;KLC2;KIF3B;RACGAP1;KIF3A;PRKAR2A;KIF3C;IFNA21;CREBBP;CBX5;H3F3A;CABLES1;CABLES2;EHD2;EHD3;KIF18A;CDK5;CAPZA2;RAB5A;RCOR1
Cell cycle: G1/S checkpoint	15/28	0.00876547	0.069257	0	0	2.64764	12.5417	RB1;GSK3B;CDKN1A;SMAD4;TGFB2;SMAD3;HDAC1;CDKN2A;CCNA1;CCND1;CCNE1;CDK4;CDK1;ATM;SKP2
Endosomal sorting complex required for transport (ESCRT) pathway	15/28	0.00876547	0.069257	0	0	2.64764	12.5417	VTA1;VPS37B;UBB;HGS;UBC;CHMP2B;CHMP2A;CHMP4C;CHMP4B;RPS27A;CHMP7;UBA52;VPS25;VPS28;CHMP5
Trefoil factor initiation of mucosal healing	19/38	0.00877443	0.069257	0	0	2.29515	10.8696	ITGB1;BAD;PDPK1;PIK3R1;RELA;RHOA;CASP9;IKBKB;NFKBIA;PIK3CA;CASP6;CASP3;RPS6KA1;TFF3;MAPK1;CYCS;RAF1;SOS1;HRAS
Axon guidance	119/325	0.00891435	0.0697322	0	0	1.32996	6.27753	EPHB6;SEMA5A;TRIO;PLXND1;ARHGAP39;ARHGAP35;RPS6KA4;ALCAM;CFL2;RPS6KA1;CHP1;EPHB2;SCN1A;SEMA6B;EPHA6;SEMA6A;CSNK2A1;UNC5B;CSNK2A2;ANK2;ANK3;MYL6;COL4A2;SCN8A;CSNK2B;COL4A5;PFN1;TLN1;RAF1;PFN2;SEMA7A;EFNA5;EFNA4;CACNA1H;MYL12B;EFNB1;STIP1;PPP3R1;RRAS;ST8SIA4;ABL2;PIP5K1C;SCN3B;SRGAP2;SRGAP1;SPTBN1;VASP;PRNP;SIAH2;RDX;NFATC2;MSN;PTK2;DLG1;CDK5;DLG4;FES;PTPRA;CDK1;CNTN1;PLXNB2;ROBO2;ITGB1;NRP1;GSK3B;…
Syndecan 2 pathway	17/33	0.00892912	0.0697322	0	0	2.43831	11.505	ITGB1;CXCL8;EPB41;ITGA2;TRAPPC4;FN1;CASK;KNG1;GNB2L1;RHOA;CASP3;RASA1;NF1;MAPK1;ITGA5;EPHB2;HRAS
RNA degradation	27/59	0.00906503	0.070421	0	0	1.93728	9.11166	DDX6;WDR61;ENO1;HSPD1;EXOSC7;EXOSC5;EXOSC10;EXOSC4;EXOSC9;DCPS;EXOSC1;TTC37;CNOT6L;LSM1;LSM4;LSM3;LSM2;LSM8;LSM7;CNOT7;LSM6;XRN1;CNOT1;RQCD1;SKIV2L;CNOT8;DCP2
E-cadherin keratinocyte pathway	12/21	0.00972232	0.0751317	0	0	3.05886	14.1727	VASP;CASR;JUP;PIK3CA;CTNND1;CTNNA1;ZYX;FMN1;PIK3R1;RAC1;AJUBA;RHOA
Shigellosis	28/62	0.00986851	0.0758642	0	0	1.89089	8.7329	ITGB1;CXCL8;ROCK1;ROCK2;ARPC1B;U2AF1;WASL;ACTB;RELA;ACTG1;IKBKB;CDC42;MAPK9;MAPK1;RAC1;WASF2;RHOG;ARPC4;NFKBIA;DIAPH1;CTTN;ARPC3;HCLS1;ITGA5;PFN1;CRK;DOCK1;PFN2
Plasma membrane estrogen receptor signaling	20/41	0.0101778	0.0778366	0	0	2.1859	10.0279	GNAZ;ROCK2;MSN;PIK3R1;ESR1;GNAI1;RHOA;GNAI2;GNA13;PIK3CA;GNAQ;GNB1;GNAS;KRAS;STRN;PLCB1;SOS1;HRAS;BCAR1;HBEGF
Chronic myeloid leukemia	32/73	0.0102625	0.0779409	0	0	1.79235	8.20762	RB1;CDKN1A;CTBP2;HDAC1;ARAF;CBLB;PIK3R2;PIK3CB;PIK3R1;CBL;RELA;IKBKB;CCND1;MECOM;AKT3;MAPK1;HRAS;SMAD4;TGFB2;SMAD3;BAD;CDKN2A;BRAF;PTPN11;NFKBIA;PIK3CA;CDK4;MDM2;KRAS;RAF1;SOS1;CRK
Rab GTPases mark targets in the endocytotic machinery	8/12	0.0102971	0.0779409	0	0	4.58692	20.9893	RAB2A;RAB1A;RAB4A;RAB27A;RAB9A;RAB5A;RAB11A;RAB8A
Ras signaling pathway	14/26	0.0106002	0.0798259	0	0	2.67681	12.1711	RALA;BAD;PDPK1;PIK3R1;PLD1;RELA;RHOA;CASP9;CDC42;PIK3CA;RAC1;RAF1;SOS1;HRAS
Ceramide signaling pathway	23/49	0.0107492	0.0801195	0	0	2.03064	9.20474	ASAH1;MAP3K1;KSR1;SPHK2;BAD;PAWR;EIF2AK2;SORCS3;TNF;RELA;TNFRSF1A;NFKBIA;PRKRA;MADD;MAPK1;CYCS;RIPK1;FADD;RAF1;BID;BIRC3;NSMAF;MAP4K4
Alpha-V beta-3 integrin/OPN pathway	16/31	0.0108191	0.0801195	0	0	2.44765	11.0791	VAV3;JUN;GSN;MAP3K1;ROCK2;PIK3R1;RELA;RHOA;CDC42;NFKBIA;PIK3CA;SPP1;MAPK1;ITGAV;RAC1;BCAR1
Stathmin and breast cancer resistance to antimicrotubule agents	16/31	0.0108191	0.0801195	0	0	2.44765	11.0791	CAMK2D;CAMK2A;CD3D;TUBA4B;TUBA4A;UHMK1;TUBA1C;CCNB1;TUBA1A;PRKAR1A;PRKAR2A;RB1CC1;STMN1;CDK1;CAMK2G;TUBA8
Acute myeloid leukemia	26/57	0.0108563	0.0801195	0	0	1.92553	8.70917	ARAF;PIK3R2;PIK3CB;PIK3R1;RELA;IKBKB;CCND1;AKT3;MAPK1;HRAS;TCF7L2;TCF7L1;JUP;BAD;ZBTB16;STAT3;BRAF;MTOR;PML;CCNA1;PIK3CA;RPS6KB1;RARA;KRAS;RAF1;SOS1
Electron transport reaction in mitochondria	7/10	0.0114072	0.0806788	0	0	5.35091	23.9373	ATP5A1;NDUFA1;UQCRC1;SDHD;SDHB;SLC25A4;SLC25A6
Free radical-induced apoptosis	7/10	0.0114072	0.0806788	0	0	5.35091	23.9373	CXCL8;GPX1;GSS;TNF;NOX1;RELA;SOD1
Zinc influx into cells by the SLC39 gene family	7/10	0.0114072	0.0806788	0	0	5.35091	23.9373	SLC39A10;SLC39A5;SLC39A8;SLC39A7;SLC39A1;SLC39A14;SLC39A4
Fatty acid, triacylglycerol, and ketone body metabolism	67/173	0.0114781	0.0806788	0	0	1.45314	6.49165	ACADVL;CHD9;TECR;MED16;MED18;MED11;MED14;MED13;ANKRD1;EP300;HADH;ACADS;FADS1;MED1;ELOVL1;SREBF1;CPT1A;PRKAB2;DGAT2;DGAT1;ELOVL4;ELOVL5;NCOA6;NCOA3;ACSL5;ELOVL6;ACSL3;MED27;APOA5;MED6;TIAM2;HADHB;MED23;NCOR2;HADHA;MED24;TBL1XR1;ACOX1;MED21;MED20;PCCB;PLIN2;PPARG;ANGPTL4;ECHS1;HMGCR;AGPAT3;ACAT1;AGPAT4;HMGCL;OXCT1;TGS1;MED31;SLC25A20;DECR1;FDFT1;ESRRA;WWTR1;CDK19;CREBBP;NFYC;TXNRD1;GRHL1;CDK8;LPCAT…
Signaling events mediated by hepatocyte growth factor receptor (c-Met)	34/79	0.0115238	0.0806788	0	0	1.73516	7.74464	SH3KBP1;WASL;PIK3R1;CBL;ETS1;CDC42;RAP1A;MLST8;CTNNA1;MAPK1;RAC1;HRAS;PAK2;NCK1;PTPN1;JUN;MAP3K1;PDPK1;BAD;RANBP9;PTPN11;RHOA;MTOR;PTK2;PIK3CA;APC;HGS;NUMB;RAF1;SOS1;CRK;MUC20;RAB5A;BCAR1
Unfolded protein response	34/79	0.0115238	0.0806788	0	0	1.73516	7.74464	ACADVL;GSK3A;CXCL8;HERPUD1;HSP90B1;EXOSC7;EXOSC5;SERP1;EXOSC4;EXOSC9;LMNA;DNAJB9;SSR1;EXOSC1;SEC31A;TSPYL2;XBP1;WFS1;DDX11;NFYC;EIF2AK3;ASNS;WIPI1;ARFGAP1;YIF1A;DNAJC3;PREB;HYOU1;TPP1;KDELR3;TLN1;DCP2;MBTPS2;ATF4
ERBB2/ERBB3 signaling events	21/44	0.0115713	0.0806788	0	0	2.09566	9.34501	CHRNA1;JUN;BAD;DOCK7;STAT3;PIK3R2;PTPN11;PIK3CB;PIK3R1;MTOR;RNF41;CDC42;MAPK9;PIK3CA;CHRNE;MAPK1;KRAS;RAC1;RAF1;SOS1;HRAS
Phosphorylation of Emi1	5/6	0.0115939	0.0806788	0	0	11.4641	51.0987	CDC20;CCNB1;FZR1;PLK1;CDK1
Apoptosis modulation by HSP70	11/19	0.0116427	0.0806788	0	0	3.15416	14.0457	CASP9;MAP3K1;CASP6;CASP3;CYCS;RIPK1;FADD;BID;HSPA1B;TNFRSF1A;HSPA1A
ER-associated degradation (ERAD) pathway	11/19	0.0116427	0.0806788	0	0	3.15416	14.0457	GANAB;UBE2I;MAN2A2;MAN1A2;CANX;CUL1;MOGS;MAN2B1;UGGT1;RBX1;SKP1
FRS2-mediated activation	11/19	0.0116427	0.0806788	0	0	3.15416	14.0457	NTRK1;RAP1A;KIDINS220;CDK1;MAPK1;BRAF;FRS2;KRAS;RAF1;CRK;HRAS
Hypoxic and oxygen homeostasis regulation of HIF-1-alpha	11/19	0.0116427	0.0806788	0	0	3.15416	14.0457	EGLN1;EGLN2;NAA10;CDKN2A;CUL2;TCEB2;TCEB1;HIF3A;HIF1A;GNB2L1;RBX1
Signaling by constitutively active EGFR	11/19	0.0116427	0.0806788	0	0	3.15416	14.0457	PIK3CA;UBB;CDC37;UBC;KRAS;PIK3R1;CBL;RPS27A;SOS1;HRAS;UBA52
Mitochondrial beta-oxidation of saturated fatty acids	6/8	0.0120678	0.0828468	0	0	6.8791	30.3864	HADHB;HADHA;ACADVL;ECHS1;HADH;ACADS
Recycling of eIF2-GDP complex	6/8	0.0120678	0.0828468	0	0	6.8791	30.3864	EIF2B4;EIF2B3;EIF2B2;EIF2S3;EIF2B1;EIF2S2
Viral myocarditis	31/71	0.0121786	0.0832208	0	0	1.77958	7.8445	CD40;LAMA2;ACTB;ACTG1;ICAM1;CASP9;HLA-DMA;HLA-DMB;CCND1;CASP3;DAG1;RAC2;RAC3;ABL2;RAC1;BID;HLA-DPA1;HLA-B;HLA-A;HLA-F;HLA-G;HLA-E;MYH2;CD40LG;HLA-DPB1;MYH9;CYCS;EIF4G3;MYH6;EIF4G2;HLA-DQB1
CXCR4 signaling pathway	47/116	0.0127556	0.0867616	0	0	1.56497	6.82607	ITGB1;GNAZ;PTEN;PIK3R2;PIK3C2G;PIK3R1;ARRB2;PIK3CB;CD3D;GNAI1;RELA;GNAI2;CDC42;GNA13;MLST8;UBQLN1;MAPK1;ITGAV;RICTOR;RAC1;HRAS;YES1;PDPK1;BAD;STAT1;ITGA2;STAT2;ITGA1;STAT3;PTPN11;GNB2L1;PTK2;RHOA;MTOR;FGR;ITCH;PIK3CA;HGS;GNAQ;GNB1;ITGA7;ITGA6;ITGA5;RAF1;PLCB1;CRK;BCAR1
RANKL regulation of apoptosis and immune response	32/74	0.0129083	0.0873973	0	0	1.74955	7.61032	CSF3R;TXN;MKI67;TNF;OAZ1;ICAM1;RELB;PYCARD;CDC42;CCND2;BAG3;CCL5;CDC27;CCR4;RPL17;GABPA;JUN;XRCC1;FAM213A;ESR1;CCNA1;MYL6;BMP2;DLG1;CDK4;FUBP1;MGP;CDK1;TXNIP;RPS20;CALM1;CDK16
Signaling by NOTCH	48/119	0.0130915	0.0876637	0	0	1.55328	6.73471	B4GALT1;MAML2;MAML1;HDAC1;SEL1L;CUL1;ATP2A3;ATP2A2;PSEN1;ARRB2;DTX4;HDAC8;HIF1A;HDAC9;APH1A;APH1B;CCND1;UBB;HEY1;POFUT1;UBC;EP300;TMED2;HES1;RPS27A;SKP1;TLE4;PSENEN;TLE3;TLE2;CREBBP;JUN;TLE1;JAG1;FBXW7;RBX1;NCOR2;CDK8;ADAM17;ITCH;TBL1XR1;AGO4;MFNG;AGO2;CNTN1;NUMB;UBA52;TNRC6A
IGF1 pathway	15/29	0.0131258	0.0876637	0	0	2.45835	10.6525	PTPN1;BAD;PDPK1;IRS2;PTPN11;PIK3R1;GNB2L1;PTK2;PIK3CA;RPS6KB1;RAF1;SOS1;HRAS;CRK;BCAR1
Sema4D in semaphorin signaling	15/29	0.0131258	0.0876637	0	0	2.45835	10.6525	ARHGEF11;ARHGEF12;ROCK1;SEMA4D;ROCK2;RHOG;ARHGAP35;RHOA;MYL12B;CDC42;MYL6;RRAS;RAC2;MYH9;RAC1
Signaling by TGF-beta receptor complex	29/66	0.0135902	0.0903563	0	0	1.79954	7.73516	CCNT2;CCNT1;ZFYVE9;HDAC1;SERPINE1;F11R;MTMR4;PPP1CB;XPO1;UBB;UBC;RPS27A;SKIL;MEN1;WWTR1;SMAD4;SMAD3;SMURF2;USP9X;CGN;RHOA;UCHL5;NCOR2;PPM1A;CDK8;PARD3;STUB1;UBA52;TRIM33
Atypical NF-kappaB pathway	10/17	0.0139187	0.0912507	0	0	3.27674	14.0065	IKBKB;NFKBIA;CSNK2A1;PIK3CA;CSNK2A2;CSNK2B;REL;ARRB2;PIK3R1;RELA
Branched-chain amino acid catabolism	10/17	0.0139187	0.0912507	0	0	3.27674	14.0065	ACAD8;BCKDHA;MCCC2;BCKDHB;DBT;BCAT1;HSD17B10;DLD;ACAT1;BCAT2
Energy-dependent regulation of mTOR by LKB1-AMPK	10/17	0.0139187	0.0912507	0	0	3.27674	14.0065	PPM1A;PRKAA1;PRKAB2;STK11;CAB39;CAB39L;RHEB;STRADB;PRKAG1;TSC1
Signaling events mediated by T cell protein tyrosine phosphatase (TC-PTP)	20/42	0.013972	0.0912507	0	0	2.08639	8.91035	ITGB1;PTPN1;CREBBP;RAB4A;CSF1;STAT1;INSR;ITGA1;STAT3;PDGFB;EIF2AK2;PIK3R2;PIK3CB;PIK3R1;VEGFA;LMAN1;PIK3CA;KDR;KPNA2;SOS1
Nucleotide excision repair	26/58	0.0140903	0.0916179	0	0	1.86522	7.95006	PCNA;CETN2;XPA;POLD4;POLR2C;POLD2;POLR2D;POLR2H;POLR2I;POLE;POLR2J;POLR2K;POLR2L;RFC5;RFC4;RFC1;GTF2H2;RAD23B;GTF2H4;GTF2H5;DDB2;RBX1;POLE4;ERCC1;RPA3;RPA4
Type II interferon signaling (interferon-gamma)	23/50	0.0142815	0.0924539	0	0	1.95529	8.30762	HIST1H4K;NOS2;HIST1H4L;STAT1;IFNGR2;STAT2;IFNA2;HLA-B;IFI6;EIF2AK2;ISG15;PTPN11;ICAM1;IFIT2;PSMB9;HIST2H4A;HIST2H4B;IFNG;OAS1;HIST1H4J;HIST1H4C;GBP1;IRF9
Pyrimidine metabolism	41/100	0.0153608	0.0990068	0	0	1.59614	6.66538	DTYMK;PRIM1;NUDT2;AK3;TYMS;POLD4;NT5E;PNP;ZNRD1;POLR2C;POLD2;POLR2D;TK2;UPP1;POLR2H;POLR2I;POLE;POLR2J;POLR2K;POLR2L;POLR2J3;DUT;POLR2J2;RRM2;ENTPD4;TXNRD2;TXNRD1;NME4;UCKL1;NME1;DCTD;NT5C3A;POLE4;NME6;POLR3B;NME7;CMPK1;POLR3F;CMPK2;POLR3H;ITPA
RhoA signaling pathway	21/45	0.0155925	0.0996487	0	0	2.00819	8.35603	ITGB1;MAP2K3;ATF2;JUN;PPP1R12A;ROCK1;ROCK2;MKL1;RDX;PTEN;MSN;PLD1;RHOA;SLC9A1;CDC42;DIAPH1;MYL2;PKN2;PIP5K1C;TLN1;MAP2K6
Progesterone-mediated oocyte maturation	36/86	0.0155954	0.0996487	0	0	1.65346	6.87968	ANAPC13;HSP90AB1;ARAF;ADCY4;ADCY2;PIK3R2;PIK3CB;PIK3R1;ANAPC10;GNAI1;GNAI2;CCNB2;MAPK9;CCNB1;FZR1;CDC23;CDC26;AKT3;CDC27;RPS6KA1;MAPK1;BUB1;PLK1;BRAF;CDC25C;CCNA2;MOS;CCNA1;PIK3CA;CDC16;CDK1;PDE3A;PGR;KRAS;RAF1;MAD2L1
Cell cycle: G2/M checkpoint	14/27	0.0159471	0.101021	0	0	2.47072	10.225	CDKN1A;PRKDC;GADD45A;RASGRF1;PLK1;CDC25C;CCNB1;CHEK1;RPS6KA1;CDK1;MDM2;EP300;ATM;YWHAH
VEGFR1 pathway	14/27	0.0159471	0.101021	0	0	2.47072	10.225	NRP1;NRP2;FLT1;PDPK1;PTPN11;PIK3R1;CBL;HIF1A;CD2AP;VEGFA;PIK3CA;RASA1;MAPK1;NCK1
Prolactin activation of MAPK signaling	32/75	0.0160802	0.101429	0	0	1.70873	7.05736	ITGB1;GSK3B;IRS2;PIK3R2;PIK3CB;PIK3R1;CBL;RELA;MAPK9;CASP3;SIRPA;FLNA;MAPK1;NEK3;RAC1;HRAS;PTPN1;JUN;NOS2;STAT1;RPS6;STAT3;PTPN11;MTOR;PTK2;NFKBIA;PIK3CA;RPS6KB1;PPIB;RAF1;SOS1;PPIA
Prostate cancer	37/89	0.0162074	0.101796	0	0	1.63406	6.73609	RB1;GSK3B;CDKN1A;HSP90AB1;GSTP1;ARAF;PTEN;PDGFB;TGFA;PIK3R2;PIK3CB;PIK3R1;RELA;HSP90B1;CASP9;IKBKB;CCND1;AKT3;EP300;MAPK1;HRAS;TCF7L2;CREBBP;TCF7L1;PDPK1;BAD;BRAF;MTOR;NFKBIA;CREB3;PIK3CA;CCNE1;MDM2;KRAS;RAF1;SOS1;ATF4
Messenger RNA decay by 5' to 3' exoribonuclease	9/15	0.0165935	0.103342	0	0	3.44026	14.1008	DDX6;LSM7;LSM6;XRN1;LSM1;LSM4;LSM3;DCP2;LSM2
TRAF6-mediated induction of TAK1 complex	9/15	0.0165935	0.103342	0	0	3.44026	14.1008	TICAM2;UBB;UBC;LY96;TAB2;TICAM1;RPS27A;MAP3K7;UBA52
Signaling by SCF-KIT	33/78	0.0168505	0.104502	0	0	1.68385	6.8758	GSK3B;CDKN1A;GSK3A;PHLPP1;PTEN;PIK3R2;PIK3R1;CBL;CASP9;AKT3;CHEK1;MLST8;MAPK1;RICTOR;RAC1;HRAS;YES1;PDPK1;BAD;CMA1;STAT1;STAT3;PTPN11;MTOR;FER;PIK3CA;FES;CDK1;MDM2;KRAS;GRAP;RAF1;SOS1
HES/HEY pathway	22/48	0.0171624	0.10599	0	0	1.94203	7.89443	RB1;SPEN;CAMK2D;CREBBP;TLE1;MAML2;HDAC1;MAML1;STAT3;GATA6;ASCL1;HIF1A;NCOR2;RCAN1;HEY1;BGLAP;MYOD1;ID1;KDR;EP300;HES1;TCF3
Telomere maintenance	26/59	0.0180496	0.110732	0	0	1.80857	7.26073	HIST2H2AA3;HIST1H2BN;HIST1H2BM;FEN1;PCNA;HIST1H2BJ;HIST1H2BL;PRIM1;HIST1H2BK;POLD4;POLD2;HIST1H2AD;POLE;HIST1H2AB;RFC5;RFC4;RFC1;H2AFZ;H2AFX;HIST1H2AJ;TINF2;TERF2;HIST2H2BE;RPA3;POT1;HIST1H2BH
Nucleotide metabolism	30/70	0.0180803	0.110732	0	0	1.72189	6.90982	DTYMK;GMPR2;AK1;AK2;GMPR;GLRX;TXN;TYMS;PFAS;DGUOK;NT5E;ATIC;PNP;GUK1;TK2;UPP1;ADSS;DUT;GPX1;RRM2;TXNRD1;NME4;APRT;NME1;DCTD;NT5C3A;IMPDH2;CMPK1;HPRT1;ADA
Amyloids	23/51	0.018675	0.113902	0	0	1.88532	7.50466	HIST2H2AA3;HIST1H2BN;APP;HIST1H2BM;GSN;HIST1H2BJ;H2AFZ;HIST1H2BL;H2AFX;HIST1H2AJ;HIST1H2BK;H3F3A;APOA4;HIST2H2BE;CST3;HIST2H3A;HIST1H3A;SAA1;HIST1H2AD;HIST1H2BH;B2M;HIST1H2AB;LTF
Cleavage of growing transcript in the termination region	20/43	0.0187978	0.114071	0	0	1.99554	7.93029	SLBP;RBM8A;CPSF1;ALYREF;U2AF1;SRRM1;LSM10;NUDT21;PABPN1;CLP1;U2AF2;MAGOH;SRSF2;SRSF3;SNRPE;SRSF4;SNRPD3;SNRPF;SRSF5;SRSF7
Skeletal muscle hypertrophy is regulated via AKT/mTOR pathway	11/20	0.0188573	0.114071	0	0	2.80349	11.1323	GSK3B;EIF2S3;PIK3CA;RPS6KB1;PDPK1;RPS6;PTEN;PIK3R1;EIF2S2;MTOR;PDK2
Toll-like receptor signaling pathway regulation	55/142	0.0203864	0.121566	0	0	1.45249	5.65438	OTUD5;CD40;CUEDC2;CXCL8;IFNA2;PIK3CB;TNF;TREM1;IKBKB;AKT3;MLST8;IL12A;RAC1;TMED7;MAP3K7;MAP2K3;IFNA13;USP7;FBXW5;TICAM2;IRAK3;IRAK4;TICAM1;RNF41;PIK3CA;PELI1;RBCK1;ZMYND11;SQSTM1;PELI2;LY96;PIK3R2;PIK3R1;RELA;MAPK9;CCL5;NEU1;SPP1;MAPK1;RIPK1;FADD;MAP2K7;CTNNAL1;IFNA21;MAP2K6;JUN;STAT1;PLK1;TMED7-TICAM2;SMAD6;NFKBIA;CXCL11;TOLLIP;TAB2;MYD88
Hemostasis pathway	163/468	0.020399	0.121566	0	0	1.23061	4.78986	DGKG;APP;DGKD;DGKA;PROS1;SERPINE1;JMJD1C;F11R;CLU;DOCK10;PPP2R1B;PPP2R1A;KIF5B;AKT3;EP300;SIRPA;SLC16A3;GUCY1A3;GUCY1A2;PRKCH;ACTN4;ATP1B1;TUBA4A;HIST2H3A;PRKAR1A;DGKQ;ORAI1;KIF20A;PFN1;TLN1;ZFPM2;RAF1;PPIA;DGKH;GATA6;PDGFB;GATA5;AK3;ITPR2;ITPR3;PIK3R2;PIK3R1;KLC1;KNG1;GNG10;KLC2;RAP1A;HIST1H3A;RACGAP1;KIF3B;KIF3A;PRKAR2A;INPP5D;PLCG2;KIF3C;A2M;IFNA21;CREBBP;TGFB2;YES1;CBX5;H3F3A;PDE2A;FN1;GNG11;…
Cyclin D-associated events in G1	18/38	0.0204257	0.121566	0	0	2.06514	8.03539	RB1;CDKN1A;CDKN2A;CUL1;PPP2R2A;PPP2R3B;CKS1B;CCND2;CCND1;PPP2R1B;UBB;PPP2R1A;CDK4;UBC;RPS27A;SKP2;UBA52;SKP1
p38 alpha/beta MAPK downstream pathway	18/38	0.0204257	0.121566	0	0	2.06514	8.03539	ATF1;MEF2A;ATF2;JUN;CSNK2A1;NOS2;CSNK2A2;KRT8;HSPB1;PLA2G4A;ESR1;SLC9A1;ELK4;RPS6KA4;MKNK1;CSNK2B;MAPKAPK2;RAB5A
Senescence and autophagy	40/99	0.0214056	0.126886	0	0	1.55695	5.98508	RB1;GSK3B;CDKN1A;CXCL8;SERPINE1;PTEN;BMI1;MAP1LC3B;RB1CC1;CREG1;MLST8;COL10A1;MAPK1;IGFBP7;IL6R;SLC39A1;HRAS;SLC39A4;MAP2K3;SH3GLB1;GABARAPL2;UVRAG;JUN;GSN;TNFSF15;CDKN2A;FN1;BRAF;INHBA;MTOR;RSL1D1;BMP2;IFNG;ATG16L1;FKBP8;MDM2;COMMD3-BMI1;IL6ST;RAF1;SQSTM1
Negative regulators of RIG-I/MDA5 signaling	16/33	0.0219348	0.129033	0	0	2.15938	8.24814	OTUD5;UBA7;DDX58;UBE2L6;ISG15;ITCH;MAVS;UBB;PCBP2;UBC;TAX1BP1;TRIM25;PIN1;RPS27A;UBA52;UBE2K
Signaling by ERBB2	41/102	0.0219426	0.129033	0	0	1.54359	5.89546	GSK3B;CDKN1A;GSK3A;PHLPP1;CUL5;PTEN;ADCY4;ITPR2;ITPR3;ADCY2;PIK3R1;CASP9;UBB;ERBB4;PRKAR2A;AKT3;UBC;MLST8;MAPK1;RICTOR;RPS27A;HRAS;YES1;PDPK1;BAD;MTOR;RNF41;ERBB2IP;PIK3CA;PRKAR1A;NRG4;CDC37;CDK1;MDM2;KRAS;STUB1;RAF1;CALM1;SOS1;UBA52;HBEGF
Bacterial invasion of epithelial cells	30/71	0.0223986	0.131192	0	0	1.67977	6.38104	ITGB1;ARPC1B;CLTC;CBLB;PIK3R2;PIK3CB;WASL;PIK3R1;CBL;ACTB;ACTG1;CDC42;CTNNA1;RAC1;WASF2;RHOG;FN1;ARPC4;RHOA;PTK2;CD2AP;ARHGAP10;CTTN;PIK3CA;ARPC3;HCLS1;ITGA5;CRK;DOCK1;BCAR1
Transcriptional activity of SMAD2/SMAD3-SMAD4 heterotrimer	19/41	0.0226783	0.132305	0	0	1.98174	7.50357	WWTR1;SMAD4;CCNT2;SMAD3;CCNT1;SMURF2;HDAC1;USP9X;SERPINE1;NCOR2;CDK8;PPM1A;UBB;UBC;RPS27A;SKIL;UBA52;TRIM33;MEN1
PKB-mediated events	14/28	0.0231287	0.132653	0	0	2.29408	8.64106	PRKAA1;PRKAB2;CAB39;CAB39L;STRADB;RPS6;PRKAG1;TSC1;MTOR;PPM1A;STK11;RPS6KB1;RHEB;MLST8
E2F1 destruction pathway	7/11	0.0231873	0.132653	0	0	4.01289	15.1051	RB1;CCNA1;CCNE1;FBXW7;CUL1;SKP2;SKP1
Folate biosynthesis	7/11	0.0231873	0.132653	0	0	4.01289	15.1051	QDPR;GCH1;SPR;ALPP;FPGS;GGH;PTS
Valine, leucine and isoleucine biosynthesis	7/11	0.0231873	0.132653	0	0	4.01289	15.1051	LARS2;PDHA1;LARS;IARS;PDHB;BCAT1;BCAT2
eIF2 regulation	7/11	0.0231873	0.132653	0	0	4.01289	15.1051	GSK3B;EIF2S3;EIF5;EIF2AK3;EIF2AK2;EIF2AK4;EIF2S2
Signaling by EGFR in cancer	44/111	0.0233987	0.133287	0	0	1.50828	5.66371	GSK3B;CDKN1A;GSK3A;PHLPP1;SH3KBP1;CLTC;PTEN;ADCY4;ITPR2;ITPR3;ADCY2;PIK3R1;CBL;CASP9;CDC42;UBB;PRKAR2A;AKT3;UBC;MLST8;LRIG1;MAPK1;RICTOR;RPS27A;HRAS;PDPK1;BAD;PTPN11;AP2B1;EPN1;MTOR;ADAM17;PIK3CA;HGS;PRKAR1A;CDC37;CDK1;MDM2;KRAS;SPRY1;RAF1;CALM1;SOS1;UBA52
Mitochondrial fatty acid beta-oxidation	12/23	0.0236593	0.133287	0	0	2.50235	9.36878	HADHB;HADHA;ACADVL;CPT1A;ECHS1;SCP2;PCCB;ACSL3;SLC25A20;HADH;ACADS;DECR1
Modulation of interferon signaling by chaperones	12/23	0.0236593	0.133287	0	0	2.50235	9.36878	RB1;IKBKB;NFKBIA;IFNG;WT1;IFNGR2;TAX1BP3;TNFRSF1B;TNF;RELA;TNFRSF1A;HSPA1A
Progesterone-initiated oocyte maturation	12/23	0.0236593	0.133287	0	0	2.50235	9.36878	CCNB1;PAQR7;PRKAR1A;PRKAR2A;RPS6KA1;CDK1;GNAS;MAPK1;PIN1;PGR;CDC25C;HRAS
Endometrial cancer	23/52	0.0240568	0.135011	0	0	1.82018	6.78443	APC2;GSK3B;TCF7L2;TCF7L1;PDPK1;BAD;ARAF;PTEN;PIK3R2;BRAF;PIK3CB;PIK3R1;CASP9;CCND1;PIK3CA;APC;AKT3;CTNNA1;MAPK1;KRAS;RAF1;SOS1;HRAS
ERBB signaling pathway	38/94	0.0242459	0.13506	0	0	1.55816	5.7956	GSK3B;CDKN1A;CAMK2D;CAMK2A;ARAF;TGFA;CBLB;PIK3R2;PIK3CB;PIK3R1;CBL;MAPK9;CCND1;ERBB4;AKT3;PAK7;PLCG2;ABL2;MAPK1;MAP2K7;HRAS;CAMK2G;PAK2;NCK1;JUN;BAD;BRAF;MTOR;PTK2;PIK3CA;RPS6KB1;NRG4;MDM2;KRAS;RAF1;SOS1;CRK;HBEGF
Leukocyte transendothelial migration	46/117	0.0242485	0.13506	0	0	1.48807	5.53472	ITGB1;ITGAM;ROCK1;ROCK2;CTNND1;PIK3R2;PIK3R1;THY1;PIK3CB;F11R;ARHGAP5;CLDN1;MLLT4;ACTB;ARHGAP35;MYL12A;GNAI1;ACTG1;ICAM1;MYL12B;GNAI2;CDC42;RAP1A;CLDN23;PLCG2;RAC2;CTNNA1;MYL10;RAC1;CD99;VASP;VAV3;MSN;CYBA;PTPN11;ACTN4;PTK2;RHOA;CLDN11;CLDN5;CLDN10;PIK3CA;MYL2;CLDN18;NOX1;BCAR1
Transport to the Golgi and subsequent modification	17/36	0.0247342	0.137247	0	0	2.05287	7.59475	B4GALT3;SEC13;SEC24B;ST6GAL1;B4GALT1;SEC24A;SAR1B;LMAN1;MAN2A2;MAN1A2;MAN2A1;MGAT1;ST8SIA6;PREB;SEC24D;SEC31A;B4GALT5
Interferon-gamma signaling pathway	39/97	0.0248568	0.137411	0	0	1.54406	5.70471	CAMK2D;CAMK2A;PIK3R1;IFI30;CBL;ICAM1;MT2A;RAP1A;EP300;MAPK1;GBP2;B2M;CAMK2G;GBP1;HLA-DPA1;PIAS4;PTPN1;CREBBP;MAP3K1;PTGES2;STAT1;IFNGR2;STAT3;HLA-B;PTPN11;HLA-A;HLA-F;HLA-G;MTOR;PML;HLA-E;IFNG;OAS1;PIK3CA;OAS2;HLA-DPB1;HLA-DQB2;IRF9;HLA-DQB1
Integrin-mediated cell adhesion	40/100	0.0254355	0.140085	0	0	1.53089	5.62084	ITGB1;MYLK2;ITGAM;ROCK1;ROCK2;ARAF;PIK3R2;CDC42;RAP1A;MAPK7;CAPN7;AKT3;RAC2;RAC3;MAPK1;ITGAV;CAPN1;RAC1;HRAS;PAK2;MAP2K6;MAP2K3;VASP;VAV3;PDPK1;ITGA2;ITGA1;BRAF;SORBS1;PTK2;ZYX;ITGA7;ITGA6;ITGA5;RAF1;TLN1;SOS1;CRK;DOCK1;BCAR1
RNA polymerase I transcription	24/55	0.0256395	0.140684	0	0	1.77682	6.5096	HIST2H2AA3;HIST1H2BN;HIST1H2BM;RRN3;HIST1H2BJ;H2AFZ;HIST1H2BL;H2AFX;HIST1H2AJ;HIST1H2BK;H3F3A;MBD2;GTF2H2;GTF2H4;HIST2H2BE;HIST2H3A;HIST1H3A;UBTF;HIST1H2AD;HIST1H2BH;POLR2H;PTRF;POLR2K;HIST1H2AB
Activated NOTCH1 signaling in the nucleus	15/31	0.0266637	0.145224	0	0	2.15074	7.79527	PSENEN;JAG1;ARRB2;PSEN1;DTX4;APH1A;ADAM17;ITCH;APH1B;UBB;UBC;CNTN1;NUMB;RPS27A;UBA52
DNA strand elongation	15/31	0.0266637	0.145224	0	0	2.15074	7.79527	RFC5;GINS2;FEN1;PCNA;RFC4;MCM7;RFC1;PRIM1;POLD4;CDC45;RPA3;POLD2;MCM3;MCM4;MCM5
EGF/EGFR signaling pathway	54/141	0.0268178	0.145526	0	0	1.42584	5.15969	ATF1;SH3KBP1;PTEN;PEBP1;ELK4;EPS8;GJA1;RPS6KA1;STMN1;MYBL2;RAC1;NCK1;VAV3;PDPK1;EPN1;PLSCR1;HGS;RASA1;RAF1;SOS1;CRK;RALA;PCNA;STXBP1;CAMK2A;PIK3R2;IQGAP1;PIK3R1;PLD1;AURKA;CDC42;MAPK9;RAP1A;MAPK7;INPP5D;MAPK1;RICTOR;JUN;JUND;MAP3K1;STAT1;TNK2;STAT3;BRAF;PTPN11;AP2B1;PTPN12;PTK2;ITCH;RPS6KB1;FOSB;KRAS;RAB5A;BCAR1
PI3K/AKT signalling	6/9	0.0269225	0.145559	0	0	4.58574	16.5765	NTRK1;PDPK1;MLST8;RICTOR;MTOR;RHOA
FAS pathway and stress induction of heat shock protein regulation	18/39	0.0273813	0.145902	0	0	1.96666	7.07584	RB1;DFFA;JUN;MAP3K1;PRKDC;FAF1;HSPB1;TNF;CASP9;CASP6;CASP3;ARHGDIB;LMNA;MAPKAPK2;CYCS;FADD;MAP3K7;PAK2
HIV-1 transcription initiation	18/39	0.0273813	0.145902	0	0	1.96666	7.07584	GTF2A1;GTF2A2;TAF13;GTF2B;TAF10;TAF9;GTF2H2;GTF2H4;GTF2E2;POLR2C;POLR2D;POLR2H;POLR2I;TAF4;POLR2J;POLR2K;POLR2L;TAF1
Signaling events regulated by Ret tyrosine kinase	18/39	0.0273813	0.145902	0	0	1.96666	7.07584	JUN;IRS2;FRS2;PTPN11;PIK3R1;PTK2;RHOA;RAP1A;PIK3CA;RASA1;MAPK1;RAC1;SOS1;HRAS;CRK;SHANK3;BCAR1;NCK1
Tricarboxylic acid (TCA) cycle	18/39	0.0273813	0.145902	0	0	1.96666	7.07584	FH;PDHA1;MDH1;IDH3G;MDH2;IDH1;IDH2;PDHB;SDHD;SDHB;CS;PDP1;OGDH;PDK3;SUCLG1;ACO2;DLD;PDK2
Control of cell cycle and breast tumor growth by estrogen-responsive protein Efp	9/16	0.0278337	0.145956	0	0	2.94858	10.5604	CCNB2;CDK8;CCNB1;SMURF2;CDK5;CDK4;CDK1;TRIM25;ESR1
Inhibitor of DNA binding (ID) signaling pathway	9/16	0.0278337	0.145956	0	0	2.94858	10.5604	RB1;ELK4;SREBF1;CCNE1;ID2;MYOD1;ID1;ID3;ELK3
Rb tumor suppressor/checkpoint signaling in response to DNA damage	9/16	0.0278337	0.145956	0	0	2.94858	10.5604	RB1;CDKN1A;CDK4;RASGRF1;CHEK1;CDK1;ATM;CDC25C;YWHAH
p75 neurotrophin receptor signaling via NF-kB	9/16	0.0278337	0.145956	0	0	2.94858	10.5604	IKBKB;NFKBIA;UBB;UBC;RPS27A;SQSTM1;UBA52;RELA;MYD88
Fas signaling pathway	45/115	0.0278859	0.145956	0	0	1.47638	5.28489	RB1;CXCL8;ROCK1;PRKDC;PDCD6;FAF1;CLTC;HSPB1;XIAP;PIK3R2;PIK3R1;PIK3CB;ACTB;ACTG2;ACTG1;IKBKB;MAPK9;MAPK7;CUX1;CASP3;MAPK1;RIPK1;CYC1;FADD;MAP2K7;BID;MAP3K7;PAK2;DEDD;MAP2K6;CSNK1G3;CASP8AP2;DFFA;MAP3K1;RFC1;PDPK1;NFATC2;PAWR;CSNK1E;HIPK3;PIK3CA;CYCS;CSNK1G2;MYD88;BIRC3
ERBB2 role in signal transduction and oncology	13/26	0.0282122	0.14611	0	0	2.29387	8.18451	PDPK1;STAT3;PIK3R1;ESR1;PIK3CA;ERBB4;EP300;MAPK1;IL6ST;RAF1;SOS1;HRAS;IL6R
Physiological and pathological hypertrophy of the heart	13/26	0.0282122	0.14611	0	0	2.29387	8.18451	MAP2K3;CAMK2D;EDN1;JUN;MYEF2;STAT3;LIFR;RHOA;PPP3CA;MAPK1;RAC1;CALM1;IL6ST
Steroid biosynthesis	13/26	0.0282122	0.14611	0	0	2.29387	8.18451	HSD17B4;MSMO1;DHCR24;CEL;HSD17B7;LIPA;LSS;SQLE;EBP;HSD17B2;SC5D;DHCR7;FDFT1
HIV genome transcription	26/61	0.0285498	0.146793	0	0	1.70497	6.06307	GTF2A1;GTF2A2;CCNT2;CCNT1;RNMT;GTF2B;TAF9;SUPT4H1;GTF2E2;POLR2C;POLR2D;TCEB2;TCEB1;POLR2H;POLR2I;POLR2J;POLR2K;NELFE;POLR2L;TAF13;TAF10;GTF2H2;SUPT5H;GTF2H4;TAF4;TAF1
Notch signaling pathway	47/121	0.0286796	0.146793	0	0	1.4587	5.18069	RBPJL;GSK3B;CDKN1A;MYCBP;MAML2;CTBP2;MAML1;HDAC1;CUL1;PIK3R2;NRARP;ENO1;PIK3R1;PSEN1;DTX4;CBL;TNF;HIF1A;APH1A;APH1B;CCND1;HEY1;POFUT1;MAGEA1;EP300;HES1;SKP2;SKP1;PSENEN;SPEN;CREBBP;CR2;TLE1;JAG1;FBXW7;STAT3;RAB11A;NCOR2;CDK8;ADAM17;ITCH;MFNG;MFAP2;CNTN1;NUMB;LNX1;BIRC3
RNA polymerase I, RNA polymerase III, and mitochondrial transcription	38/95	0.028837	0.146793	0	0	1.53072	5.42807	HIST2H2AA3;GTF3C1;HIST1H2BN;HIST1H2BM;RRN3;GTF3C5;HIST1H2BJ;HIST1H2BL;HIST1H2BK;SNAPC5;HIST1H3A;SNAPC1;SNAPC2;SNAPC4;UBTF;HIST1H2AD;POLR2H;PTRF;POLR2K;HIST1H2AB;POLR2L;H2AFZ;H2AFX;HIST1H2AJ;H3F3A;MBD2;GTF3A;GTF2H2;GTF2H4;HIST2H2BE;HIST2H3A;NFIA;POLR3B;NFIB;POLR3F;HIST1H2BH;POLR3H;BDP1
APC/C activator regulation between G1/S and early anaphase	11/21	0.0289058	0.146793	0	0	2.52296	8.94066	CDC20;CCNB1;FZR1;CDC23;UBE2C;CDC26;PLK1;CDC16;CDC27;CDK1;ANAPC10
S1P/S1P1 pathway	11/21	0.0289058	0.146793	0	0	2.52296	8.94066	GNAZ;ABCC1;PDGFB;KDR;MAPK1;ITGAV;RAC1;GNAI1;RHOA;GNAI2;VEGFA
Pathways in cancer	115/325	0.0289409	0.146793	0	0	1.25956	4.46199	RB1;CSF3R;ARAF;CBLB;ETS1;FGF7;CCND1;AKT3;EP300;SKP2;PIAS4;FLT3LG;RBX1;COL4A2;CCNE1;RAF1;CTBP2;CUL2;PDGFB;TGFA;PIK3R2;PIK3R1;PLD1;HIF1A;HSP90B1;TPR;PLCG2;FADD;CREBBP;JUN;SMAD4;TGFB2;SMAD3;JUP;ZBTB16;FN1;FZD8;BRAF;PTK2;BMP4;NFKBIA;BMP2;CDK4;MDM2;CYCS;FGF12;ITGB1;GSK3B;CDKN1A;CXCL8;HSP90AB1;PTEN;LAMC1;PIK3CB;CKS1B;IKBKB;CASP9;MECOM;CASP3;RAC2;RAC3;ITGAV;RAC1;HRAS;APC2;DCC;MMP1;ITGA2;WNT9B;TRAF1;RHOA…
Wnt signaling pathway	84/231	0.0291359	0.147276	0	0	1.31353	4.64437	GPI;GSK3B;GSK3A;CHD8;PPP3CA;GJA1;CCND2;PPP2R1B;SOX17;CCND1;PPP2R1A;PPP2R5E;SOX15;AKT3;RAC2;RAC3;CHP1;EP300;RAC1;SOX7;MAP3K7;CER1;SKP1;ANKRD6;DACT1;APC2;TLE4;CSNK1G3;TLE3;TLE2;PRKCH;TLE1;CSNK2A1;CSNK2A2;SOX13;WNT9B;SOX14;CACYBP;RPSA;TSC1;CSNK1E;SENP2;RHOA;DKK3;RBX1;PYGO2;DAAM1;TBL1XR1;CSNK2B;RARA;PLCB1;MDFI;CSNK1G2;PAFAH1B1;CAMK2D;CTBP2;ROCK1;HDAC1;ROCK2;TSHZ1;CAMK2A;CUL1;PRICKLE1;PSEN1;HDAC9;LRP6…
Messenger RNA splicing: minor pathway	19/42	0.0298705	0.149507	0	0	1.89545	6.65469	SF3B4;SF3B2;SF3B6;DDX23;LSM2;SNRPD2;SNRPD1;POLR2C;POLR2D;SRSF2;SNRPE;POLR2H;SNRPD3;SNRPF;POLR2I;POLR2J;SRSF7;POLR2K;POLR2L
TWEAK signaling pathway	19/42	0.0298705	0.149507	0	0	1.89545	6.65469	GSK3B;CD163;JUN;TNFRSF12A;HDAC1;TRAF1;RELA;RELB;IKBKB;NFKBIA;MAPK9;CASP3;CCL5;MAPK1;RIPK1;FADD;RAC1;RAF1;MAP3K7
MAPK cascade role in angiogenesis	27/64	0.0298812	0.149507	0	0	1.67488	5.87971	ATF2;NRP1;ROBO4;PLXND1;IQGAP1;CDC42;DAG1;KDR;TIMP2;MAPK1;RAC1;MAP3K7;NCK1;MAP2K6;SEMA4A;PDPK1;BAD;FRS2;PTPN11;BMX;MTOR;VEGFA;APC;KRAS;RAF1;SOS1;CRK
HIF-2-alpha transcription factor network	16/34	0.0299862	0.149526	0	0	2.03927	7.15174	EGLN1;CREBBP;FLT1;EGLN2;SERPINE1;ETS1;SIRT1;VEGFA;APEX1;KDR;PGK1;EP300;TCEB2;TCEB1;EIF3E;FXN
NGF signaling via TRKA from the plasma membrane	52/136	0.0302683	0.150424	0	0	1.42191	4.97335	ATF1;GSK3B;CDKN1A;GSK3A;CLTC;PTEN;IRS2;PIK3CB;CASP9;PPP2R1B;PPP2R1A;AKT3;RPS6KA1;MLST8;HRAS;MEF2A;DUSP4;DUSP3;PDPK1;FRS2;DUSP6;RHOA;PIK3CA;PRKAR1A;MAPKAPK2;RAF1;SOS1;CRK;RALA;PHLPP1;ADCY4;ITPR2;ITPR3;PIK3R2;ADCY2;PIK3R1;RAP1A;MAPK7;PRKAR2A;MAPK1;RICTOR;NTRK1;BAD;KIDINS220;STAT3;BRAF;AP2B1;MTOR;CDK1;MDM2;KRAS;CALM1
Internal ribosome entry pathway	5/7	0.0304087	0.150615	0	0	5.73164	20.0208	EIF4A2;EIF4A1;EIF4G3;EIF3A;EIF4G2
Small cell lung cancer	34/84	0.0311847	0.153942	0	0	1.56109	5.41357	ITGB1;RB1;LAMA2;LAMA4;PTEN;XIAP;PIK3R2;LAMC1;PIK3CB;PIK3R1;RELA;CKS1B;CASP9;IKBKB;CCND1;AKT3;ITGAV;SKP2;PIAS4;NOS2;ITGA2;LAMB4;FN1;LAMB1;TRAF1;PTK2;NFKBIA;COL4A2;PIK3CA;CCNE1;CDK4;CYCS;ITGA6;BIRC3
Beta-oxidation of lauroyl-CoA to decanoyl-CoA	4/5	0.0322418	0.155578	0	0	9.16977	31.4935	HADHB;HADHA;ECHS1;HADH
Chk1/Chk2(Cds1)-mediated inactivation of cyclin B-Cdk1 complex	4/5	0.0322418	0.155578	0	0	9.16977	31.4935	CCNB1;CHEK1;CDK1;CDC25C
Coenzyme A biosynthesis	4/5	0.0322418	0.155578	0	0	9.16977	31.4935	SLC25A16;PANK2;PPCS;COASY
Sulfide oxidation to sulfate	4/5	0.0322418	0.155578	0	0	9.16977	31.4935	TST;ETHE1;SQRDL;SUOX
Signaling events mediated by VEGFR1 and VEGFR2	29/70	0.0323103	0.155578	0	0	1.62351	5.57248	PRKAA1;FLT1;HSP90AB1;ROCK1;PRKAG1;IQGAP1;PIK3R1;CBL;CDC42;KDR;CTNNA1;MAPK1;ITGAV;PAK2;NCK1;MAP2K6;MAP2K3;PDPK1;BRAF;PTPN11;RHOA;PTK2;VEGFA;PIK3CA;HGS;FES;NEDD4;MAPKAPK2;RAF1
Actin cytoskeleton regulation	82/226	0.0324605	0.155578	0	0	1.30882	4.48628	CYFIP2;ITGB1;CYFIP1;MYLK2;ITGAM;ARPC1B;ARAF;BRK1;PIK3C2G;WASL;PIK3CB;ACTB;ARHGAP35;ACTG1;PPP1CB;FGF7;CFL2;RAC2;PIP4K2A;RAC3;ITGAV;RAC1;HRAS;APC2;VAV3;ARHGEF12;PPP1R12A;ITGA2;ITGA1;RRAS2;ACTN4;RHOA;TIAM2;ENAH;PIK3CA;MYL2;ITGA7;MYH9;ITGA6;ITGA5;PFN1;RAF1;SOS1;CRK;DOCK1;PFN2;ROCK1;ROCK2;PDGFB;PIK3R2;IQGAP1;PIK3R1;MYL12A;FGD1;MYL12B;SLC9A1;CDC42;GNA13;SCIN;RRAS;PAK7;MYL10;MAPK1;PIP5K1C;PAK2;WASF2;GSN…
Reelin signaling pathway	14/29	0.0324649	0.155578	0	0	2.14099	7.33844	ITGB1;GSK3B;LRPAP1;PIK3R1;VLDLR;CBL;MAPK8IP1;RAP1A;RELN;CDK5;PIK3CA;ARHGEF2;MAP2K7;PAFAH1B1
S1P/S1P3 pathway	14/29	0.0324649	0.155578	0	0	2.14099	7.33844	GNAZ;FLT1;PDGFB;GNAI1;RHOA;GNAI2;VEGFA;GNA13;GNAQ;AKT3;MAPK1;ITGAV;S1PR3;RAC1
Skeletal myogenesis control by HDAC and calcium/calmodulin-dependent kinase (CaMK)	14/29	0.0324649	0.155578	0	0	2.14099	7.33844	MEF2A;INSR;NFATC2;PIK3R1;MEF2BNB-MEF2B;CABIN1;PPP3CA;MAPK7;PIK3CA;MYOD1;CAMK1;CALM1;MAP2K6;YWHAH
Phospholipid metabolism	75/205	0.0326897	0.155802	0	0	1.32581	4.53519	ARF3;ACHE;CERK;SLC44A2;PITPNB;HEXB;HEXA;PTEN;PIK3C2G;PIK3CB;GBA3;TAZ;COL4A3BP;STS;SPTLC1;PIP4K2A;TPTE2;CERS5;PLA2G12A;DGAT2;DGAT1;SPHK2;PLA2G4A;SUMF2;PISD;SUMF1;HADHB;GNPAT;HADHA;PLA2G16;PIK3CA;PPAP2B;CSNK1G2;CERS2;CDS1;MTMR1;MTMR2;ASAH1;MTMR3;PIK3R2;PIK3R1;MTMR4;PLD1;MTMR6;AGPAT3;AGPAT4;UGCG;NEU4;PTDSS1;SGPL1;INPP5D;NEU1;INPP5J;PIP5K1C;CEPT1;KDSR;CDIPT;CTSA;CHKB;PNPLA8;PLA2G2A;EPT1;MBOAT1;SYNJ2;…
Gap junction pathway	36/90	0.0327226	0.155802	0	0	1.53054	5.23398	HTR2B;ADCY4;PDGFB;ITPR2;ADCY2;ADRB1;ITPR3;GRM1;GNAI1;GNAI2;TUBB8;TUBA1C;GJA1;TUBA1B;TUBB6;TUBA1A;MAPK7;TUBB3;MAPK1;HRAS;GUCY1A3;GUCY1A2;TUBB;TUBB4B;TUBB4A;TUBA4A;TJP1;TUBB2A;GNAQ;CDK1;GNAS;KRAS;PLCB1;RAF1;SOS1;TUBA8
Interleukin-1 signaling pathway	48/125	0.0335635	0.159195	0	0	1.43163	4.85939	ATF2;CXCL8;PELI2;CUL1;HSPB1;UBE2L6;PIK3R2;PIK3R1;RELA;ELK4;IKBKB;MAPK9;MAPK7;MAPK1;ERC1;MAP2K7;MAP3K7;SKP1;MAP2K6;MAP2K3;UBE2F;JUN;UBE2H;TICAM2;UBE2I;MAP3K1;UBE2B;UBE2C;DUSP1;IRAK3;PTPN11;UBE2A;IRAK4;RBX1;NFKBIA;PIK3CA;UBE2R2;UBE2S;TOLLIP;UBE2T;MAPKAPK2;REL;PELI1;TAB2;UBE2V1;SQSTM1;UBE2K;MYD88
ATF2 transcription factor network	25/59	0.0338183	0.159195	0	0	1.68746	5.71501	RB1;ACHE;ATF2;CXCL8;CUL3;MAPK9;CSRP2;CCND1;EP300;MAPK1;HES1;JUN;TGFB2;JUND;H2AFY;NOS2;DUSP1;GADD45A;ESR1;SELE;CCNA2;IFNG;CDK4;NF1;JDP2
Caspase cascade in apoptosis	25/59	0.0338183	0.159195	0	0	1.68746	5.71501	APP;NUMA1;XIAP;TNF;CASP9;CASP6;CASP3;CFL2;ARHGDIB;LMNA;TNFSF10;RIPK1;FADD;BID;SREBF1;DFFA;GSN;MAP3K1;PTK2;TNFRSF1A;KRT18;MADD;CYCS;VIM;BIRC3
AKT phosphorylation of cytosolic targets	8/14	0.0338666	0.159195	0	0	3.05751	10.3507	CASP9;GSK3B;CDKN1A;GSK3A;BAD;PDPK1;AKT3;MDM2
Cytosolic tRNA aminoacylation	12/24	0.0344876	0.159573	0	0	2.29365	7.72309	YARS;AIMP1;NARS;AIMP2;WARS;QARS;LARS;TARS;GARS;IARS;EPRS;AARS
NF-kappaB signaling pathway	12/24	0.0344876	0.159573	0	0	2.29365	7.72309	IKBKB;NFKBIA;MAP3K1;RIPK1;FADD;TNFRSF1B;TNF;MAP3K7;RELA;MYD88;TNFRSF1A;MAP4K4
Plexin D1 signaling	12/24	0.0344876	0.159573	0	0	2.29365	7.72309	ITGB1;NRP1;SEMA4A;PLXND1;RRAS;ITGA2;ITGA1;ITGA7;ITGA6;ITGAV;ITGA5;VEGFA
Protein export	12/24	0.0344876	0.159573	0	0	2.29365	7.72309	OXA1L;SPCS3;IMMP2L;SPCS1;SRP72;SEC61G;SRP54;SEC61B;SRP14;SEC11A;SRP9;SEC63
SREBP signaling	12/24	0.0344876	0.159573	0	0	2.29365	7.72309	SREBF1;SEC13;SEC24B;SEC24A;INSIG2;SAR1B;INSIG1;SCAP;SEC24D;SEC23B;MBTPS2;SEC31A
MAL role in Rho-mediated activation of SRF	10/19	0.0354033	0.162789	0	0	2.54821	8.51345	CDC42;MAP4K2;DIAPH1;MAP3K1;ROCK1;MAPK1;RAC1;RAF1;HRAS;RHOA
PTEN-dependent cell cycle arrest and apoptosis	10/19	0.0354033	0.162789	0	0	2.54821	8.51345	ITGB1;PIK3CA;PDPK1;PTEN;MAPK1;PIK3R1;SOS1;PTK2;BCAR1;PDK2
Glioma	27/65	0.0366721	0.1681	0	0	1.63069	5.39062	RB1;CDKN1A;CAMK2D;CAMK2A;ARAF;PTEN;PDGFB;TGFA;PIK3R2;PIK3CB;PIK3R1;CCND1;AKT3;PLCG2;MAPK1;HRAS;CAMK2G;CDKN2A;BRAF;MTOR;PIK3CA;CDK4;MDM2;KRAS;RAF1;SOS1;CALM1
Interleukin-4 regulation of apoptosis	95/267	0.0379908	0.173605	0	0	1.26965	4.15227	TOP2A;CDKN1A;CXCL8;ITGAM;MCM7;UBE2L6;MED16;TNF;UBL3;CTSL;CA2;CASP3;LRRTM2;SNAPC4;TNFSF10;TIMP2;SLC39A8;UPP1;IL13RA2;CTSC;DACT1;PPP1R16B;ST6GAL1;SLC38A1;ANXA1;RSAD2;DST;ITGA2;PAWR;ARID5B;LIFR;ZDHHC17;DUSP6;HIST2H2BE;ARL4C;DNAJC3;CH25H;AIM1;DAAM1;LOX;DPPA4;MFNG;EEF1A2;MCM3;CLDN18;MCM4;RBMS1;MCM5;SOS1;FJX1;CHST2;HLA-DQB1;SLC22A4;NDRG4;NNMT;GATA6;PDGFB;IFI6;CREM;GNAI1;NUAK1;CDC45;NFIL3;TP53BP2;SPP1;G…
Meiotic recombination	23/54	0.0382909	0.174437	0	0	1.70251	5.55449	HIST2H2AA3;HIST1H2BN;HIST1H2BM;HIST1H2BJ;H2AFZ;HIST1H2BL;H2AFX;HIST1H2AJ;HIST1H2BK;H3F3A;MND1;HIST2H2BE;RAD50;HIST2H3A;RAD51C;HIST1H3A;RAD51;CDK4;RPA3;HIST1H2AD;HIST1H2BH;ATM;HIST1H2AB
Neurotrophin signaling pathway	48/126	0.0386131	0.175363	0	0	1.41317	4.59869	GSK3B;ZNF274;CAMK2D;CAMK2A;IRS2;PIK3R2;PIK3R1;PSEN1;PIK3CB;RELA;RPS6KA4;IKBKB;CDC42;MAPK9;RAP1A;MAPK7;AKT3;ARHGDIB;RPS6KA1;PLCG2;MAPK1;RAC1;MAP2K7;HRAS;CAMK2G;YWHAH;NTRK1;JUN;MAP3K1;BAD;KIDINS220;SORT1;FRS2;BRAF;IRAK3;PTPN11;IRAK4;RHOA;NFKBIA;NGFRAP1;PIK3CA;MAPKAPK2;KRAS;RAF1;CALM1;SOS1;CRK;ATF4
CTCF pathway	13/27	0.0396013	0.178751	0	0	2.12986	6.8771	SMAD1;SMAD4;TGFB2;CDKN2A;PTEN;CTCF;PIK3R1;SMAD6;MTOR;TGFBR3;PIK3CA;RPS6KB1;MDM2
Pentose phosphate pathway	13/27	0.0396013	0.178751	0	0	2.12986	6.8771	PRPS2;GPI;PRPS1;TKTL1;G6PD;H6PD;RPE;TALDO1;PGD;DERA;PGLS;ALDOA;TKT
Interleukin-5 regulation of apoptosis	54/144	0.0400075	0.179636	0	0	1.37802	4.43541	CXCL8;HEXA;MT1X;ENO1;ICAM1;HEY1;QSOX1;UPP1;MAP3K7;IER2;IER3;DUSP4;TRAF1;DUSP6;SFPQ;FEZ1;IL3RA;ITGA6;RAF1;SGK1;ATF4;BIRC3;HBEGF;IDI1;HMGCR;SRI;HIF1A;SUPT6H;ZFP36L2;RELA;RELB;PSMB4;NFIL3;MKNK1;TRA2A;HAS2;FADD;CCR1;TRAP1;YES1;GADD45A;FUCA1;TFPI2;HSPA2;INHBA;SOD2;SELE;PRRC2A;CLEC2B;WT1;ID2;REL;ZYX;MYD88
Mechanism of gene regulation by peroxisome proliferators via PPAR-alpha	24/57	0.0400409	0.179636	0	0	1.66889	5.37026	RB1;MED1;CPT1A;CREBBP;DUT;JUN;NOS2;DUSP1;HSD17B4;PIK3R1;TNF;RELA;MRPL11;NCOR2;NFKBIA;PIK3CA;ACOX1;PRKAR1A;PRKAR2A;NRIP1;EP300;COX2;MAPK1;HSPA1A
Toll receptor cascades	59/159	0.0406374	0.181133	0	0	1.3552	4.34078	ATF1;APP;ATF2;UBE2L6;CTSS;EEA1;IKBKB;PPP2R1B;PPP2R1A;CTSL;RPS6KA1;MAP3K7;MAP2K3;MEF2A;DUSP4;TICAM2;DUSP3;IRAK3;IRAK4;TICAM1;DUSP6;UBE2R2;MAPKAPK2;PELI1;UBE2V1;UBA52;PELI2;LY96;RELA;HSP90B1;MAPK9;MAPK7;UBB;UBC;PLCG2;MAPK1;RIPK1;MAP2K7;RPS27A;MAP2K6;UBE2F;JUN;UBE2H;UBE2I;MAP3K1;UBE2B;UBE2C;EIF2AK2;UBE2A;NFKBIA;UBE2S;TOLLIP;UBE2T;CDK1;SAA1;TAB2;UBE2K;MYD88;LGMN
Assembly of HIV virion	7/12	0.0412336	0.181133	0	0	3.21008	10.2354	UBB;UBC;NMT2;VPS37B;RPS27A;UBA52;VPS28
ERK inactivation	7/12	0.0412336	0.181133	0	0	3.21008	10.2354	DUSP4;DUSP3;MAPK7;PPP2R1B;PPP2R1A;MAPK1;DUSP6
Granzyme A-mediated apoptosis pathway	7/12	0.0412336	0.181133	0	0	3.21008	10.2354	CREBBP;DFFA;SET;ANP32A;APEX1;CASP3;NME1
SODD/TNFR1 signaling pathway	7/12	0.0412336	0.181133	0	0	3.21008	10.2354	MADD;RIPK1;FADD;TNFRSF1B;TNF;BIRC3;TNFRSF1A
SRF and microRNAs in smooth muscle differentiation and proliferation	7/12	0.0412336	0.181133	0	0	3.21008	10.2354	MEF2A;CAMK2D;MYOCD;CCND2;MEF2B;NKX2-5;MEF2BNB-MEF2B
Salmonella infection	7/12	0.0412336	0.181133	0	0	3.21008	10.2354	CDC42;ACTR2;ARPC3;ARPC1B;ARPC4;RAC1;WASL
Nephrin interactions	11/22	0.0422648	0.184565	0	0	2.29344	7.25598	PIK3CA;CASK;PIK3R2;ACTN4;IQGAP1;PIK3CB;PIK3R1;WASL;SPTBN1;CD2AP;NCK1
RNA polymerase II promoter escape	11/222	0.0422648	0.184565	0	0	2.29344	7.25598	GTF2A1;GTF2A2;TAF13;GTF2B;TAF10;TAF9;GTF2H2;TAF4;GTF2H4;GTF2E2;TAF1
Signaling of hepatocyte growth factor receptor	17/38	0.0433378	0.185516	0	0	1.8571	5.82892	ITGB1;JUN;ITGA1;STAT3;PTEN;PTPN11;PIK3R1;PTK2;RAP1A;PIK3CA;RASA1;MAPK1;RAF1;SOS1;HRAS;CRK;DOCK1
Angiopoietin receptor Tie2-mediated signaling	21/49	0.0433713	0.185516	0	0	1.72081	5.39984	ITGB1;CDKN1A;ANGPT2;FN1;PTPN11;PIK3R1;BMX;ETS1;TNF;RELA;PTK2;ELF1;PIK3CA;RPS6KB1;FES;RASA1;MAPK1;RAC1;ITGA5;CRK;NCK1
Arf6 integrin-mediated signaling pathway	21/49	0.0433713	0.185516	0	0	1.72081	5.39984	ITGB1;SPAG9;RALA;ITGA2;CLTC;CTNND1;ITGA1;KLC1;PLD1;MAPK8IP3;NME1;SCAMP2;EDNRB;CTNNA1;EXOC3;ITGA7;ITGAV;ITGA6;ITGA5;PIP5K1C;VAMP3
Glycerolipid metabolism	21/49	0.0433713	0.185516	0	0	1.72081	5.39984	DGKG;DGKD;DGAT2;DGAT1;AGK;DGKA;GLYCTK;AKR1A1;MBOAT1;AKR1B1;CEL;AGPAT3;AGPAT4;ALDH3A2;DGKQ;PPAP2B;ALDH7A1;GLA;PNLIP;ALDH9A1;DGKH
Chromatin remodeling by hSWI/SNF ATP-dependent complexes	9/17	0.0434882	0.185516	0	0	2.57982	8.08843	GTF2A1;SMARCC1;SMARCC2;GTF2B;GTF3A;NF1;ARID1A;NR3C1;ACTB
Nitric oxide metabolism	9/17	0.0434882	0.185516	0	0	2.57982	8.08843	GCHFR;LYPLA1;GCH1;SPR;NOSTRIN;ZDHHC21;WASL;CALM1;PTS
Syndecan 3 pathway	9/17	0.0434882	0.185516	0	0	2.57982	8.08843	PSENEN;APH1A;POMC;CXCL8;APH1B;CTTN;SDC3;CASK;PSEN1
Zinc transporters	9/17	0.0434882	0.185516	0	0	2.57982	8.08843	SLC30A6;SLC30A3;SLC39A10;SLC39A5;SLC39A8;SLC39A7;SLC39A14;SLC39A1;SLC39A4
Biosynthesis of the N-glycan precursor (dolichol lipid-linked oligosaccharide, LLO) and transfer to a nascent protein	14/30	0.0442493	0.18714	0	0	2.00703	6.25775	DPAGT1;ALG5;PMM2;ALG14;ALG2;ALG13;ALG3;ALG1;ALG10;DPM1;DPM2;DPM3;RFT1;GNPNAT1
Butanoate metabolism	14/30	0.0442493	0.18714	0	0	2.00703	6.25775	ECHS1;PDHA1;ACSM1;GAD2;PDHB;ACAT2;ACAT1;HMGCL;HADHA;BDH2;OXCT1;L2HGDH;HADH;ACADS
Nuclear events mediated by MAP kinases	14/30	0.0442493	0.18714	0	0	2.00703	6.25775	ATF1;DUSP4;MEF2A;ATF2;JUN;DUSP3;DUSP6;MAPK9;MAPK7;PPP2R1B;PPP2R1A;RPS6KA1;MAPKAPK2;MAPK1
Retinoblastoma protein regulation	27/66	0.0445554	0.187896	0	0	1.58876	4.94267	RB1;ATF2;CDKN1A;HDAC1;AATF;MAPK9;CCND2;CCND1;BGLAP;UBTF;EP300;SKP2;CREBBP;JUN;TGFB2;CDKN2A;PPP2R3B;SIRT1;CCNA2;ELF1;CCNE1;CDK4;MYOD1;MDM2;PPARG;RAF1;TAF1
Post-translational protein modification	71/196	0.0453845	0.19063	0	0	1.30491	4.03553	DPAGT1;B4GALT3;PIGU;PGAP1;B4GALT1;ST6GALNAC2;PIGO;GPAA1;TUSC3;PRKCSH;GALNT18;PROS1;PIGP;PIGW;PIGV;PIGX;C1GALT1C1;STS;MAN1A2;GNPNAT1;VKORC1;PDIA3;EIF5A;ST6GAL1;SEC13;MUCL1;ALG5;ALG2;ALG14;ALG3;ALG13;MOGS;ALG1;ALG10;SUMF2;DDOST;SUMF1;DPM1;DPM2;DPM3;B3GNT7;DAD1;CANX;RFT1;PREB;B4GALT5;RPN2;SAR1B;LMAN1;GANAB;MAN2A2;MAN2A1;ST8SIA6;MGAT1;GCNT6;UGGT2;ST3GAL1;GCNT7;UGGT1;SEC31A;EDEM3;SEC24B;SEC24A;MUC17;G…
Pyruvate metabolism	22/52	0.0454619	0.19063	0	0	1.68261	5.20074	ACSS2;PDHA1;SLC16A1;MDH1;MDH2;GLO1;AKR1B1;ACYP2;PDHB;ACAT2;ACAT1;ALDH3A2;PDP1;PKM;PDK3;HAGH;SLC16A3;ALDH7A1;DLD;PDK2;LDHAL6A;ALDH9A1
NFAT involvement in hypertrophy of the heart	28/69	0.0458396	0.191669	0	0	1.56727	4.83126	GSK3B;ATP2A3;ATP2A2;PIK3R1;TNF;HDAC9;PPP3CA;PRKAR2A;MAPK1;NKX2-5;HRAS;ADSS;YWHAH;EDN1;CREBBP;PDPK1;NFATC2;ALOX15B;MYH2;PIK3CA;RPS6KB1;PRKAR1A;MYL2;CAMK1;RAF1;SOS1;CALM1;HBEGF
Basigin interactions	12/25	0.0484088	0.201462	0	0	2.11707	6.41063	ITGB1;SLC7A5;PPIL2;SLC16A1;MMP1;SLC7A9;SLC3A2;ITGA6;SLC7A11;ATP1B1;SLC16A3;PPIA
E2F-mediated regulation of DNA replication	15/33	0.0484546	0.201462	0	0	1.9115	5.78635	RB1;PCNA;RRM2;PRIM1;PPP2R3B;TYMS;CCNA1;CCNB1;CDC45;PPP2R1B;PPP2R1A;CCNE1;ORC2;CDK1;TK2
Oocyte meiosis	43/113	0.0490184	0.203233	0	0	1.41029	4.25282	ANAPC13;CAMK2D;CAMK2A;CUL1;ADCY4;ITPR2;ITPR3;ADCY2;SMC3;ANAPC10;AURKA;CDC20;PPP1CB;CCNB2;PPP3CA;CCNB1;PPP3R1;CDC23;SLK;PPP2R1B;PTTG1;PPP2R1A;PPP2R5E;CDC26;CDC27;RPS6KA1;CHP1;MAPK1;BUB1;CAMK2G;SKP1;YWHAH;PLK1;CDC25C;SMC1A;RBX1;MOS;CCNE1;CDC16;CDK1;PGR;CALM1;MAD2L1
Cdc25 and Chk1 regulatory pathway in response to DNA damage	6/10	0.0501956	0.204101	0	0	3.43905	10.2891	CHEK1;RASGRF1;CDK1;ATM;CDC25C;YWHAH
Fanconi anemia pathway regulation	6/10	0.0501956	0.204101	0	0	3.43905	10.2891	UBB;FANCD2;UBC;ATM;RPS27A;UBA52
IRAK2-mediated activation of TAK1 complex	6/10	0.0501956	0.204101	0	0	3.43905	10.2891	UBB;UBC;TAB2;RPS27A;MAP3K7;UBA52
Nef-mediated downregulation of MHC class I complex cell surface expression	6/10	0.0501956	0.204101	0	0	3.43905	10.2891	AP1B1;AP1S2;AP1S1;HLA-A;B2M;AP1M1
Ran role in mitotic spindle regulation	6/10	0.0501956	0.204101	0	0	3.43905	10.2891	RANBP1;TPX2;NUMA1;KPNA2;AURKA;KIF15
Signal-dependent regulation of myogenesis by corepressor MITR	6/10	0.0501956	0.204101	0	0	3.43905	10.2891	MEF2A;MYOD1;CAMK1;HDAC9;MEF2BNB-MEF2B;YWHAH
Splicing regulation through Sam68	6/10	0.0501956	0.204101	0	0	3.43905	10.2891	KHDRBS1;RASA1;CDK1;MAPK1;RAF1;HRAS
Androgen receptor proteolysis and transcription regulation	25/61	0.0507698	0.204744	0	0	1.59348	4.7493	KDM3A;TMF1;PRKDC;TGFB1I1;CCND1;ZMIZ1;PRDX1;NRIP1;HNRNPA1;PIAS4;VAV3;MED1;SVIL;GSN;UBE2I;NCOA6;CDKN2A;XRCC5;PAWR;RANBP9;PA2G4;CDK11B;LATS2;ZNF318;TCF4
Clathrin derived vesicle budding	25/61	0.0507698	0.204744	0	0	1.59348	4.7493	CLTC;AP4E1;BLOC1S1;FTH1;AP1S2;AP1S1;SNX9;STX4;AP3S1;SNX5;AP1M1;TXNDC5;HSPA8;SORT1;AP1B1;DTNBP1;HIP1R;AP4B1;IGF2R;NECAP1;DNAJC6;CPD;DNASE2;FTL;PICALM
Leptin signaling pathway	25/61	0.0507698	0.204744	0	0	1.59348	4.7493	KHDRBS1;PIK3R2;PIK3R1;RELA;IKBKB;CDC42;CCND1;CFL2;MAPK1;KPNA4;RAC1;HRAS;SOCS7;PTPN1;STAT1;RPS6;STAT3;PTPN11;ESR1;RHOA;MTOR;RPS6KB1;REL;RAF1;SOS1
Diabetes pathways	51/137	0.0509361	0.204855	0	0	1.36171	4.05406	ACADVL;GSK3A;CXCL8;ACTB;HERPUD1;SERP1;KIF5B;TSPYL2;SLC30A6;EXOC8;IGFBP4;MMP1;DDX11;WIPI1;ARFGAP1;DNAJC3;EXOC3;PREB;KDELR3;TLN1;STX1A;DCP2;ATF4;HSP90B1;EXOSC7;EXOSC5;EXOSC4;EXOSC9;LMNA;IGF2BP1;SSR1;DNAJB9;IGF2BP2;SEC11A;EXOSC1;SEC31A;BCHE;XBP1;WFS1;NFYC;EIF2AK3;IGF2;ASNS;MYO5A;RAB27A;YIF1A;SPCS3;SPCS1;HYOU1;TPP1;MBTPS2
4-1BB-dependent immune response	10/20	0.0519492	0.207235	0	0	2.29323	6.78219	MAP2K3;IKBKB;NFKBIA;ATF2;JUN;MAP3K1;IFNG;MAP4K5;RELA;MAP2K6
Peroxisomal lipid metabolism	10/20	0.0519492	0.207235	0	0	2.29323	6.78219	GNPAT;PHYH;AMACR;SCP2;ACOX1;IDH1;HSD17B4;FAR1;HACL1;SLC27A2
Sprouty regulation of tyrosine kinase signals	10/20	0.0519492	0.207235	0	0	2.29323	6.78219	PTPRB;SH3KBP1;RASA1;SPRY4;MAPK1;SPRY1;CBL;RAF1;SOS1;HRAS
Phospholipids as signaling intermediaries	16/36	0.0522492	0.207334	0	0	1.83508	5.41665	ASAH1;PDPK1;PIK3C2G;PIK3R1;GNAI1;PTK2;RHOA;PIK3CA;GNB1;MAPK1;ITGAV;RAC1;PLCB1;RAF1;SOS1;HRAS
Validated nuclear estrogen receptor alpha network	26/64	0.052255	0.207334	0	0	1.57003	4.63414	CALCOCO1;PCNA;SET;ANP32A;HDAC1;ATP5J;PHB2;CCND1;NRIP1;EP300;NDUFV3;DDX17;MED1;JUN;SMAD4;XBP1;NCOA3;ABCA3;AP1B1;SAFB;ESR1;POU4F1;SOD1;NCOR2;LCOR;PGR
Adhesion and diapedesis of granulocytes	8/15	0.0536073	0.210437	0	0	2.62053	7.66786	CSF3;CXCL8;ITGAM;SELPLG;IFNG;ICAM2;TNF;ICAM1
Cyclin A/B1-associated events during G2/M transition	8/15	0.0536073	0.210437	0	0	2.62053	7.66786	CCNA2;CCNA1;CCNB2;CCNB1;XPO1;PLK1;CDK1;CDC25C
PRC2 complex long-term gene silencing through modification of histone tails	8/15	0.0536073	0.210437	0	0	2.62053	7.66786	SUZ12;PHC1;H3F3B;HDAC1;H3F3A;RBBP7;BMI1;EZH1
Terpenoid backbone biosynthesis	8/15	0.0536073	0.210437	0	0	2.62053	7.66786	FDPS;IDI1;MVK;PMVK;MVD;HMGCR;ACAT2;ACAT1
TGF-beta receptor activation of SMADs	13/28	0.0538776	0.210937	0	0	1.98773	5.80624	SMAD4;SMAD3;SMURF2;ZFYVE9;MTMR4;UCHL5;PPP1CB;XPO1;UBB;UBC;STUB1;RPS27A;UBA52
Glycerophospholipid metabolism	31/79	0.0579779	0.22639	0	0	1.48213	4.22064	DGKG;CDS1;ACHE;DGKD;DGKA;LCAT;TAZ;PLD1;AGPAT3;AGPAT4;PTDSS1;CEPT1;CDIPT;LYPLA2;LYPLA1;PLA2G12A;CHKB;PLA2G2A;EPT1;MBOAT1;PLA2G4A;PISD;PLA2G15;GNPAT;LPCAT4;DGKQ;PPAP2B;LPCAT3;LPCAT2;PEMT;DGKH
Alpha-6 beta-4 integrin signaling pathway	14/31	0.0587316	0.227964	0	0	1.88883	5.35442	LAMA2;IRS2;PIK3R2;LAMB1;PTPN11;LAMC1;PIK3R1;MTOR;PTK2;RHOA;MAPK1;ITGA6;RAC1;HRAS
Fatty acid metabolism	18/42	0.058745	0.227964	0	0	1.72046	4.87672	ACADVL;CPT1A;ACAA2;ECHS1;ECI2;ACSL5;ACSL3;ACAT2;ADH5;ACAT1;ALDH3A2;HADHB;HADHA;ACOX1;HADH;ACADS;ALDH7A1;ALDH9A1
Angiogenesis	11/23	0.0593199	0.227964	0	0	2.10217	5.93823	SMAD1;CREBBP;FLT1;PIK3CA;PDGFB;KDR;TIMP2;MAPK1;HIF1A;PTK2;VEGFA
BAD phosphorylation mediated by IGF1R signaling	11/23	0.0593199	0.227964	0	0	2.10217	5.93823	PIK3CA;BAD;PRKAR1A;PRKAR2A;RPS6KA1;MAPK1;PIK3R1;RAF1;SOS1;HRAS;YWHAH
Hypoxia and p53 in the cardiovascular system	11/23	0.0593199	0.227964	0	0	2.10217	5.93823	NQO1;CDKN1A;ABCB1;GADD45A;MDM2;EP300;ATM;UBE2A;HIF1A;HSPA1A;TAF1
Rho cell motility signaling pathway	11/23	0.0593199	0.227964	0	0	2.10217	5.93823	ARHGEF11;DIAPH1;GSN;ROCK1;MYL2;ARHGAP1;ARHGAP5;BAIAP2;PFN1;TLN1;RHOA
C-Myb transcription factor network	33/85	0.0596166	0.227964	0	0	1.45644	4.10691	CDKN1A;SLC25A3;LECT2;YEATS4;IQGAP1;ETS1;PPP3CA;CA1;CCNB1;CCND1;MAT2A;CASP6;TOM1;EP300;HES1;CD34;HRAS;MAP3K7;HSPA8;CREBBP;GSTM1;UBE2I;H2AFZ;CDKN2A;HIPK2;CCNA1;MYOD1;MCM4;KRAS;TAB2;PPID;ADA;BIRC3
TGF-beta regulation of skeletal system development	33/85	0.0596166	0.227964	0	0	1.45644	4.10691	ROCK1;ZFYVE9;ROCK2;CUL1;TNF;LTBP1;THBS3;ACVR1C;PPP2R1B;PPP2R1A;EP300;MAPK1;SKP1;ACVR1;SMAD1;CREBBP;SMAD4;TGFB2;SMAD3;SMURF2;INHBB;INHBA;SMAD6;RHOA;ACVR2A;RBX1;BMP4;BMP2;IFNG;RPS6KB1;ID2;ID1;ID3
CHL1 interactions	5/8	0.060977	0.228432	0	0	3.82082	10.6878	ITGB1;NRP1;STIP1;ITGA2;ITGA1
Degradation of cysteine and homocysteine	5/8	0.060977	0.228432	0	0	3.82082	10.6878	TST;CTH;ETHE1;SQRDL;SUOX
Formyl peptide interaction with formyl peptide receptors	5/8	0.060977	0.228432	0	0	3.82082	10.6878	HEBP1;APP;ANXA1;SAA1;FPR3
Mitotic metaphase/anaphase transition	5/8	0.060977	0.228432	0	0	3.82082	10.6878	STAG1;STAG2;PLK1;SMC1A;SMC3
NOD-like receptor (NLR) proteins	5/8	0.060977	0.228432	0	0	3.82082	10.6878	ERBB2IP;IKBKB;CD40;EPHB2;MAP3K7
Nicotinate metabolism	5/8	0.060977	0.228432	0	0	3.82082	10.6878	NMNAT1;NAPRT;NAMPT;NMNAT3;NADSYN1
Sema4D-mediated inhibition of cell attachment and migration	5/8	0.060977	0.228432	0	0	3.82082	10.6878	RRAS;SEMA4D;RAC1;ARHGAP35;RHOA
Thiamine metabolism	5/8	0.060977	0.228432	0	0	3.82082	10.6878	MTMR1;MTMR2;NFS1;PHPT1;MTMR6
RNA polymerase III transcription	19/45	0.0615128	0.229348	0	0	1.67638	4.6746	GTF3C1;GTF3C5;GTF3A;ADAR;NR3C1;SNAPC5;SFPQ;SNAPC1;NFIA;POLR3B;SNAPC2;NFIB;SNAPC4;POLR3F;POLR3H;POLR2H;BDP1;POLR2K;POLR2L
Cell surface interactions at the vascular wall	36/94	0.0615324	0.229348	0	0	1.42458	3.97199	ITGB1;ITGAM;SELPLG;PROS1;PIK3R2;SLC3A2;PIK3CB;SLC7A11;PIK3R1;F11R;TREM1;THBD;INPP5D;SIRPA;ITGAV;CD58;HRAS;SLC16A3;ANGPT2;PPIL2;SLC16A1;YES1;MMP1;FN1;PTPN11;ATP1B1;MERTK;SLC7A5;PROC;PIK3CA;SLC7A9;ITGA6;KRAS;ITGA5;SOS1;PPIA
LPA receptor mediated events	26/65	0.0626435	0.232901	0	0	1.52966	4.23762	GSK3B;GNAZ;CXCL8;ADCY4;ADCY2;PIK3CB;PIK3R1;ADRA1B;GNAI1;RELA;GNAI2;GNA13;SLC9A3R2;CASP3;RAC1;HRAS;JUN;RHOA;PTK2;NFKBIA;GNAQ;GNB1;TRIP6;CRK;BCAR1;HBEGF
Fatty acid beta oxidation	15/34	0.0630348	0.232956	0	0	1.81076	5.00507	ACADVL;CPT1A;ACSS2;ECHS1;CHKB;ACSL5;ACSL3;ACAT1;HADHB;HADHA;SLC25A20;HADH;ACADS;DLD;DECR1
Signaling by insulin receptor	41/109	0.0635828	0.232956	0	0	1.38399	3.81346	KLB;ATP6V1A;PRKAA1;CAB39;CAB39L;PRKAG1;IRS2;PIK3R2;PIK3R1;PIK3CB;TCIRG1;FGF7;STK11;MLST8;MAPK1;ATP6V0A4;ATP6V1E1;ATP6V0E2;HRAS;ATP6V1C1;ATP6V1G1;PRKAB2;ATP6V0B;ATP6V0E1;PDPK1;INSR;STRADB;RPS6;FRS2;TSC1;PTPN11;MTOR;PPM1A;PIK3CA;RPS6KB1;RHEB;CDK1;KRAS;RAF1;SOS1;CRK
AMPK signaling	27/68	0.0639263	0.232956	0	0	1.51104	4.1554	CDKN1A;PRKAA1;CAB39;PRKAG1;PIK3R2;PIK3CB;HMGCR;PIK3R1;ADRA1B;ADIPOR1;ELAVL1;STK11;CCNB1;SREBF1;CPT1A;PRKAB2;STRADB;INSR;TSC1;EEF2;MTOR;CCNA2;CCNA1;INS-IGF2;PIK3CA;RPS6KB1;PLCB1
Epithelial cell signaling in Helicobacter pylori infection	27/68	0.0639263	0.232956	0	0	1.51104	4.1554	ATP6V1A;CXCL8;TCIRG1;F11R;RELA;IKBKB;CDC42;MAPK9;CXCR1;CASP3;CCL5;PLCG2;ATP6V0A4;RAC1;ATP6V1E1;ATP6V0E2;ATP6V1C1;ATP6V0B;ATP6V1G1;JUN;ATP6V0E1;ATP6AP1;PTPN11;NFKBIA;TJP1;ADAM17;HBEGF
Activation of chaperones by IRE1 alpha	20/48	0.0640012	0.232956	0	0	1.6386	4.50427	TSPYL2;ACADVL;GSK3A;XBP1;WFS1;DDX11;WIPI1;ARFGAP1;YIF1A;DNAJC3;SERP1;LMNA;DNAJB9;SSR1;HYOU1;PREB;TPP1;KDELR3;TLN1;SEC31A
Activated AMPK stimulation of fatty-acid oxidation in muscle	9/18	0.0640788	0.232956	0	0	2.29301	6.30038	CPT1A;PRKAA1;PRKAB2;STK11;CAB39;CAB39L;STRADB;PRKAG1;SLC25A20
Human cytomegalovirus and MAP kinase pathways	9/18	0.0640788	0.232956	0	0	2.29301	6.30038	MAP2K3;RB1;MAP3K1;PIK3CA;PDPK1;MAPK1;PIK3R1;RELA;MAP2K6
TNFR2 signaling pathway	9/18	0.0640788	0.232956	0	0	2.29301	6.30038	IKBKB;NFKBIA;MAP3K1;DUSP1;RIPK1;TRAF1;TNFRSF1B;TANK;RELA
Tie2 signaling	9/18	0.0640788	0.232956	0	0	2.29301	6.30038	ANGPT2;PIK3CA;PIK3R2;PTPN11;KRAS;PIK3CB;PIK3R1;SOS1;HRAS
Cell adhesion molecules (CAMs)	49/133	0.0647879	0.234956	0	0	1.33921	3.66493	ITGB1;CNTNAP2;CD40;ITGAM;ICAM2;PTPRM;F11R;CLDN1;PTPRF;ICAM1;ALCAM;CLDN23;CTLA4;ITGAV;CD34;NEO1;ICOSLG;HLA-DPA1;HLA-B;HLA-A;PDCD1LG2;HLA-F;HLA-G;HLA-E;CLDN11;CLDN5;CLDN10;CLDN18;ITGA6;HLA-DQB1;SELPLG;SDC3;NRXN2;GLG1;HLA-DMA;HLA-DMB;CD58;NCAM2;CD99;MPZL1;CD276;CADM3;NEGR1;SELE;CD40LG;CNTN1;HLA-DPB1;PVRL2;PVRL1
ALK1 pathway	12/26	0.0657202	0.236038	0	0	1.9657	5.35134	ACVRL1;ACVR1;SMAD1;SMAD4;CSNK2B;ID1;GDF2;MAPK1;ARRB2;INHBA;ACVR2A;ENG
CARM1 and regulation of the estrogen receptor	12/26	0.0657202	0.236038	0	0	1.9657	5.35134	SPEN;NCOR2;GTF2A1;MED1;CREBBP;CCND1;HDAC1;NRIP1;EP300;PHB2;ESR1;HIST2H3C
Integrins in angiogenesis	29/74	0.0661317	0.236038	0	0	1.47877	4.0165	CSF1;COL13A1;ROCK1;COL11A1;COL12A1;PIK3R1;F11R;CBL;KDR;SPP1;COL10A1;MAPK1;ITGAV;RAC1;VAV3;FN1;PTPN11;RHOA;PTK2;VEGFA;PIK3CA;RPS6KB1;COL6A2;COL7A1;COL6A1;ANGPTL3;COL4A5;TLN1;BCAR1
Activation of DNA fragmentation factor	7/13	0.0663656	0.236038	0	0	2.67488	7.25581	DFFA;H1F0;CASP3;HIST1H1D;HIST1H1A;HIST1H1B;KPNA1
Advanced glycosylation endproduct receptor signaling	7/13	0.0663656	0.236038	0	0	2.67488	7.25581	APP;LGALS3;PRKCSH;CAPZA2;SAA1;MAPK1;DDOST
PI3K class IB pathway	7/13	0.0663656	0.236038	0	0	2.67488	7.25581	PDPK1;INPP5D;AKT3;PTEN;KRAS;HRAS;GNAI1
Purine salvage	7/13	0.0663656	0.236038	0	0	2.67488	7.25581	DGUOK;PNP;GMPR2;GMPR;HPRT1;ADA;APRT
p27 phosphorylation regulation during cell cycle progression	7/13	0.0663656	0.236038	0	0	2.67488	7.25581	RB1;CCNE1;CUL1;SKP2;CKS1B;RBX1;SKP1
ALK in cardiac myocytes	16/37	0.0668484	0.236615	0	0	1.74757	4.72774	ACVR1;ATF2;GSK3B;SMAD1;SMAD4;TGFB2;RFC1;SMAD6;NPPB;BMP4;TGFBR3;BMP2;APC;MYL2;NKX2-5;MAP3K7
FRA pathway	16/37	0.0668484	0.236615	0	0	1.74757	4.72774	JUN;CXCL8;JUND;CDKN2A;MMP1;TXLNG;NFATC2;USF2;CCNA2;THBD;GJA1;CCND1;BGLAP;MGP;EP300;ATF4
Transcriptional regulation of white adipocyte differentiation	30/77	0.0670734	0.236843	0	0	1.4647	3.95756	CHD9;MED16;TNF;MED18;RELA;MED11;MED14;MED13;TGS1;MED31;EP300;MED1;SREBF1;CDK19;CREBBP;NCOA6;NCOA3;MED27;MED6;MED23;NCOR2;CDK8;MED24;FABP4;TBL1XR1;CDK4;MED21;MED20;PPARG;ANGPTL4
Insulin signaling pathway	96/277	0.0692077	0.243796	0	0	1.21862	3.2545	GSK3B;GSK3A;ARAF;PRKAG1;PTEN;CBLB;IRS2;PIK3C2G;PIK3CB;ARHGAP5;TNF;PTPRF;HK1;RPS6KA4;IKBKB;PPP1CB;KIF5B;AKT3;RPS6KA1;RAC2;FLOT1;FLOT2;RAC1;EIF2B1;HRAS;GYG1;MAP3K7;NCK1;MAP2K3;MAP4K2;SREBF1;PRKAB2;PRKCH;CSNK2A1;PDPK1;RPS6;RHOG;TSC1;RHOA;TNFRSF1A;PIK3CA;PRKAR1A;RASA1;EXOC3;SGK1;RAF1;SOS1;CRK;RHOQ;PRKAA1;ROCK1;ROCK2;STXBP1;PIK3R2;PIK3R1;CBL;CYTH3;MAPK9;RHOT1;MAPK7;KIF3A;INPP5D;PRKAR2A;MKNK1;PHKG2;MAP…
CDO in myogenesis	13/29	0.0712754	0.249887	0	0	1.86336	4.92152	MEF2A;MYOG;SPAG9;MEF2B;CDC42;MYOD1;BOC;CTNNA1;BNIP2;TCF4;TCF3;NEO1;MAP2K6
RNA polymerase	13/29	0.0712754	0.249887	0	0	1.86336	4.92152	POLR2J3;POLR2J2;ZNRD1;POLR3B;POLR2C;POLR2D;POLR3F;POLR3H;POLR2H;POLR2I;POLR2J;POLR2K;POLR2L
Biosynthesis of unsaturated fatty acids	10/21	0.0728979	0.253903	0	0	2.0846	5.45894	FADS2;HADHA;ACOT7;ELOVL5;ACOX1;SCD;SCD5;TECR;ELOVL6;FADS1
Inactivation of APC/C via direct inhibition of the APC/C complex	10/21	0.0728979	0.253903	0	0	2.0846	5.45894	CDC20;FZR1;CDC23;UBE2C;CDC26;CDC16;CDC27;BUB3;ANAPC10;MAD2L1
Signaling by FGFR in disease	47/128	0.072937	0.253903	0	0	1.33197	3.48731	KLB;GSK3B;CDKN1A;GSK3A;PHLPP1;PTEN;ADCY4;ITPR2;ITPR3;ADCY2;PIK3R1;CBL;CASP9;FGF7;ZMYM2;UBB;CUX1;PPP2R1A;PRKAR2A;MKNK1;AKT3;FGFR1OP2;UBC;MLST8;MAPK1;RICTOR;RPS27A;HRAS;CPSF6;PDPK1;BAD;STAT1;STAT3;FRS2;BRAF;PTPN11;MTOR;PIK3CA;PRKAR1A;CDK1;MDM2;FGFR1OP;KRAS;RAF1;CALM1;SOS1;UBA52
Acyl chain remodeling of cardiolipin	4/6	0.0735377	0.254196	0	0	4.58455	11.9655	HADHB;HADHA;PLA2G4A;TAZ
ER quality control compartment (ERQC)	4/6	0.0735377	0.254196	0	0	4.58455	11.9655	EDEM3;EDEM2;UGGT2;UGGT1
Multi-drug resistance factors	4/6	0.0735377	0.254196	0	0	4.58455	11.9655	ABCC1;ABCB1;GSTP1;ABCB11
RhoA activity regulation	19/46	0.0758773	0.26167	0	0	1.61417	4.16237	ARHGEF11;VAV3;ARHGEF10;TRIO;ARHGEF12;ARHGEF28;ARHGEF17;MYO9B;ARAP1;ARHGAP5;ARHGAP35;RHOA;ABR;AKAP13;OBSCN;ARHGDIB;ARHGEF3;ARHGEF2;SRGAP1
CD40L signaling pathway	8/16	0.0793808	0.270592	0	0	2.2928	5.8088	IKBKB;NFKBIA;CD40;MAP3K1;CD40LG;DUSP1;RELA;MAP4K4
Cell-extracellular matrix interactions	8/16	0.0793808	0.270592	0	0	2.2928	5.8088	ITGB1;VASP;FBLIM1;TESK1;FLNA;PARVA;RSU1;FERMT2
Gap-filling DNA repair biosynthesis and ligation in global genomic nucleotide excision repair	8/16	0.0793808	0.270592	0	0	2.2928	5.8088	RFC5;POLD4;PCNA;RFC4;RFC1;RPA3;POLD2;POLE
Pantothenate and CoA biosynthesis	8/16	0.0793808	0.270592	0	0	2.2928	5.8088	PANK2;PANK3;VNN1;PPCS;ENPP3;BCAT1;COASY;BCAT2
TGF-beta receptor signaling in EMT (epithelial to mesenchymal transition)	8/16	0.0793808	0.270592	0	0	2.2928	5.8088	UBB;PARD3;UBC;CGN;F11R;RPS27A;UBA52;RHOA
Basal transcription factors	15/35	0.0802957	0.271327	0	0	1.7201	4.33816	GTF2A1;GTF2A2;TAF13;GTF2B;TAF10;TAF9;GTF2H2;GTF2H4;GTF2E2;TAF7;GTF2IRD1;TAF4;TAF2;GTF2I;TAF1
Integrated cancer pathway	15/35	0.0802957	0.271327	0	0	1.7201	4.33816	RB1;SMAD3;BAD;MMP1;STAT1;PLK1;PTEN;CASP9;RAD50;CDK4;CASP3;CHEK1;CDK1;MDM2;ATM
fMLP induced chemokine gene expression in HMC-1 cells	15/35	0.0802957	0.271327	0	0	1.7201	4.33816	MAP2K3;MAP3K1;NFATC2;PIK3C2G;RELA;NFKBIA;PPP3CA;MAPK1;RAC1;CAMK1;CALM1;PLCB1;RAF1;HRAS;MAP2K6
Sulfur amino acid metabolism	11/24	0.0803318	0.271327	0	0	1.94032	4.8927	GOT1;MAT2A;TST;ADI1;CBS;CTH;ETHE1;SQRDL;SUOX;ENOPH1;CNDP2
Epidermal growth factor receptor (EGFR) pathway	41/111	0.0821853	0.274608	0	0	1.34425	3.35899	CBLB;PIK3R2;PIK3R1;WASL;CBL;ACTB;ACTG2;ACTG1;RPS6KA4;CYTH3;MAPK9;RHOT1;MAPK7;AKT3;RPS6KA1;PLCG2;RAC2;RAC3;MAPK1;RAC1;MAP2K7;HRAS;MAP2K6;NCK1;MAP2K3;VAV3;JUN;PRKCH;PDPK1;BAD;CDKN2A;SPRY4;RHOG;RHOA;PIK3CA;RPS6KB1;KRAS;SPRY1;RAF1;SOS1;RHOQ
Interleukin-1 regulation of extracellular matrix	44/120	0.0821957	0.274608	0	0	1.32881	3.32022	ATF2;CSF3;CXCL8;PRKDC;AKR1B1;CXCL3;TNF;RELA;ICAM1;RGS5;MT2A;SCIN;CCL8;CCL5;NAMPT;SPP1;A2M;SRGN;MED1;SMAD1;JUN;SMAD3;NOS2;MMP1;TXNRD1;HLA-B;INHBA;PLXDC2;SOD2;DUSP6;MMP10;ALDH3A2;BMP4;NFKBIA;GREM1;BMP2;MMP13;LOX;IFNG;FABP5;ID1;PPARG;BIRC3;HBEGF
Alpha-linolenic (omega3) and linoleic (omega6) acid metabolism	6/11	0.0826056	0.274608	0	0	2.75105	6.86022	FADS2;SCP2;ACOX1;ELOVL5;HSD17B4;FADS1
Messenger RNA decay by 3' to 5' exoribonuclease	6/11	0.0826056	0.274608	0	0	2.75105	6.86022	EXOSC7;EXOSC5;EXOSC4;EXOSC9;DCPS;EXOSC1
Regulated proteolysis of p75 neurotrophin receptor	6/11	0.0826056	0.274608	0	0	2.75105	6.86022	APH1A;PSENEN;ADAM17;APH1B;PSEN1;RELA
Signaling by VEGF	6/11	0.0826056	0.274608	0	0	2.75105	6.86022	NRP1;NRP2;FLT1;FLT4;KDR;VEGFA
Unwinding of DNA	6/11	0.0826056	0.274608	0	0	2.75105	6.86022	GINS2;CDC45;MCM7;MCM3;MCM4;MCM5
ERBB4 signaling events	16/38	0.0839471	0.277194	0	0	1.66801	4.13261	WWP1;PIK3R2;PIK3CB;PIK3R1;ADAM17;ITCH;PIK3CA;ERBB4;DLG4;NRG4;NEDD4;LRIG1;MDM2;MAPK1;TAB2;HBEGF
RAC1 activity regulation	16/38	0.0839471	0.277194	0	0	1.66801	4.13261	VAV3;TRIO;RASGRF2;RASGRF1;ARHGAP1;EPS8;PREX2;TIAM2;ABR;PREX1;RACGAP1;CHN1;RAC1;ARHGEF2;SOS1;DOCK1
Signal transduction through IL-1R	16/38	0.0839471	0.277194	0	0	1.66801	4.13261	MAP2K3;JUN;TGFB2;MAP3K1;PEBP1;IRAK3;TNF;RELA;IKBKB;NFKBIA;TOLLIP;TAB2;MAP3K7;MYD88;MAP2K6;MAP4K4
Control of gene expression by vitamin D receptor	12/27	0.0866153	0.284098	0	0	1.83453	4.48776	TOP2B;MED1;CREBBP;SMARCC1;SMARCC2;HDAC1;NCOA3;COPS2;ACTL6A;EP300;ARID1A;BAZ1B
EGFR downregulation	12/27	0.0866153	0.284098	0	0	1.83453	4.48776	CDC42;UBB;SH3KBP1;HGS;CLTC;UBC;SPRY1;AP2B1;CBL;RPS27A;UBA52;EPN1
ERK5 role in neuronal survival pathway	12/27	0.0866153	0.284098	0	0	1.83453	4.48776	MEF2A;NTRK1;MAPK7;PIK3CA;PDPK1;RPS6KA1;MAPK1;PIK3R1;RAF1;SOS1;MEF2BNB-MEF2B;HRAS
ERBB1 internalization pathway	17/41	0.0871273	0.285144	0	0	1.62461	3.96467	SH3KBP1;CBLB;PIK3R2;PIK3CB;PIK3R1;CBL;EPN1;PTK2;CDC42;PIK3CA;HGS;LRIG1;KRAS;RAF1;SOS1;HRAS;RAB5A
AP-1 transcription factor network	27/70	0.0885475	0.289133	0	0	1.44055	3.49221	ATF2;CXCL8;PTEN;NR3C1;ETS1;HIF1A;GJA1;MT2A;CCND1;EP300;TIMP1;TCF7L2;EDN1;JUN;JUND;DUSP1;MMP1;CDKN2A;NFATC2;HLA-A;ESR1;ELF1;FABP4;IFNG;TRIP6;CDK1;FOSB
Glycosaminoglycan degradation	9/19	0.0898867	0.289133	0	0	2.06356	4.97155	HGSNAT;NAGLU;IDUA;HEXB;HYAL2;HEXA;HYAL3;GUSB;SGSH
Lissencephaly gene (LIS1) in neuronal migration and development	9/19	0.0898867	0.289133	0	0	2.06356	4.97155	DCTN6;CLIP1;RELN;CSNK2A1;CDK5;DCTN3;DYNLL1;NDEL1;PAFAH1B1
Ras activation upon calcium influx through NMDA receptor	9/19	0.0898867	0.289133	0	0	2.06356	4.97155	CAMK2D;DLG4;RASGRF2;CAMK2A;RASGRF1;AKAP9;CALM1;CAMK2G;HRAS
Signaling by FGFR1 fusion mutants	9/19	0.0898867	0.289133	0	0	2.06356	4.97155	CPSF6;ZMYM2;CUX1;PIK3CA;STAT1;STAT3;FGFR1OP2;FGFR1OP;PIK3R1
Gastrin pathway	18/44	0.0898981	0.289133	0	0	1.58789	3.82534	ITGB1;SREBF1;JUN;CXCL8;JAG1;CDKN2A;HDC;SERPINE1;SLC4A2;VEGFA;CCND1;S100A6;GAST;HES1;ITGAV;IER3;BIRC3;HBEGF
PI3K events in ERBB2 signaling	18/44	0.0898981	0.289133	0	0	1.58789	3.82534	GSK3B;CDKN1A;GSK3A;PHLPP1;BAD;PDPK1;PTEN;PIK3R1;MTOR;CASP9;PIK3CA;ERBB4;NRG4;AKT3;MLST8;MDM2;RICTOR;HBEGF
RIG-I/MDA5-mediated induction of interferon-alpha/beta pathways	29/76	0.0901092	0.289133	0	0	1.41564	3.40707	APP;OTUD5;UBA7;IFNA2;UBE2L6;TANK;RELA;IKBKB;UBB;PCBP2;UBC;EP300;TRIM25;RIPK1;FADD;RPS27A;IFNA21;CREBBP;MAP3K1;DDX58;ISG15;NFKBIA;ITCH;MAVS;TAX1BP1;SAA1;PIN1;UBA52;UBE2K
VEGF signaling pathway	29/76	0.0901092	0.289133	0	0	1.41564	3.40707	HSPB1;PIK3R2;PIK3CB;PIK3R1;CASP9;CDC42;PPP3CA;PPP3R1;AKT3;KDR;RAC2;PLCG2;CHP1;RAC3;MAPK1;RAC1;HRAS;PLA2G12A;SPHK2;BAD;PLA2G2A;PLA2G4A;NFATC2;PTK2;VEGFA;PIK3CA;MAPKAPK2;KRAS;RAF1
T cell receptor signaling pathway	50/139	0.0907634	0.2906	0	0	1.28952	3.09419	GSK3B;ARHGAP1;CBLB;PIK3CB;ARHGAP5;TNF;CD3D;IKBKB;PPP3CA;AKT3;CHP1;CTLA4;RAC1;MAP3K7;HRAS;NCK1;VAV3;ARAP2;ARAP1;ARFGAP3;ARFGAP1;RHOA;IFNG;PIK3CA;RASA1;RAF1;SOS1;PIK3R2;ASAP1;BCL10;PIK3R1;CBL;RELA;CDC42;MAPK9;PPP3R1;CHN1;PAK7;MAPK1;MAP2K7;PAK2;JUN;MAP3K1;NFATC2;NFKBIA;DLG1;CD40LG;CDK4;KRAS;CALM1
Activation of kainate receptors upon glutamate binding	13/30	0.0919424	0.291903	0	0	1.75363	4.1852	GRIK5;GRIK2;GNG11;GNG13;GNG10;DLG1;GNG5;DLG4;GNG7;GNB1;GNB4;CALM1;PLCB1
Inactivation of GSK3 by Akt causes accumulation of beta-catenin in alveolar macrophages	13/30	0.0919424	0.291903	0	0	1.75363	4.1852	GSK3B;CSNK2A1;PDPK1;EIF2AK2;PIK3R1;RELA;LRP6;GJA1;PROC;CCND1;APC;PIK3CA;MYD88
Tumor necrosis factor (TNF) pathway	13/30	0.0919424	0.291903	0	0	1.75363	4.1852	JUN;MAP3K1;TNFRSF1B;TNF;TNFRSF1A;IKBKB;NFKBIA;MAPK9;CASP3;FADD;MAP2K7;MAP3K7;BIRC3
Actions of nitric oxide in the heart	19/47	0.0923116	0.291903	0	0	1.55641	3.70829	CHRNA1;GUCY1A3;GUCY1A2;FLT1;PDPK1;FLT4;PDE2A;PIK3R1;SLC7A1;KNG1;VEGFA;PIK3CA;PRKAR1A;PRKAR2A;GNAQ;GNB1;KDR;PDE3A;CALM1
Prolactin regulation of apoptosis	43/118	0.0925152	0.291903	0	0	1.3158	3.1321	SF3B4;VPS29;SDCCAG3;HSP90AB1;DCTN3;CLDN1;N4BP2L2;UQCRH;MYL12B;MRPL40;CCND1;FTH1;HNRNPA1;PHLDA1;SOCS7;LMCD1;GBP1;CA13;IER3;GET4;PCMTD1;SRRM2;DUSP4;CCT2;NOS2;SSR3;IGF2;ANK3;FNDC3A;KLHL24;DUSP6;RBX1;NUP93;OXA1L;PSMA4;BCL6;WT1;AKAP9;CMPK1;NABP1;SSBP1;ALDH7A1;TMEM106A
Fc gamma receptor-mediated phagocytosis	35/94	0.0925546	0.291903	0	0	1.36121	3.23961	ARPC1B;ASAP3;ASAP1;PIK3R2;PIK3CB;WASL;PIK3R1;PLD1;CDC42;SCIN;CFL2;INPP5D;AKT3;RAC2;PLCG2;MAPK1;RAC1;PIP5K1C;WASF2;WASF3;VAV3;VASP;MARCKSL1;GSN;MYO10;SPHK2;PLA2G4A;ARPC4;PIK3CA;RPS6KB1;ARPC3;PPAP2B;RAF1;CRK;FCGR2C
L1CAM interactions	35/94	0.0925546	0.291903	0	0	1.36121	3.23961	ITGB1;NRP1;NRP2;CLTC;LAMC1;RPS6KA4;STIP1;ALCAM;RPS6KA1;MAPK1;ITGAV;RAC1;EPHB2;SCN3B;SPTBN1;SCN1A;CSNK2A1;ITGA2;CSNK2A2;ITGA1;RDX;MSN;RANBP9;ANK2;LAMB1;ANK3;AP2B1;DLG1;DLG4;SCN8A;CSNK2B;NUMB;CNTN1;SCN4A;ITGA5
Phosphatidylinositol metabolism	20/50	0.0944122	0.297127	0	0	1.52914	3.6089	ARF3;TPTE2;MTMR1;MTMR2;MTMR3;PITPNB;PTEN;PIK3C2G;PIK3R2;PIK3CB;PIK3R1;SYNJ2;MTMR4;MTMR6;FIG4;PIK3CA;INPP5D;INPP5J;PIP4K2A;PIP5K1C
Amyotrophic lateral sclerosis (ALS)	21/53	0.0962377	0.300404	0	0	1.50528	3.52376	MAP2K3;GPX1;TOMM40;BAD;DERL1;TNFRSF1B;TNF;TNFRSF1A;SOD1;CASP9;PPP3CA;PPP3R1;ALS2;CASP3;CHP1;CYCS;RAC1;BID;RAB5A;MAP2K6;PRPH
JNK/MAPK pathway	21/53	0.0962377	0.300404	0	0	1.50528	3.52376	DUSP4;MEF2A;ATF2;JUN;MAP3K1;GADD45A;DUSP16;MEF2BNB-MEF2B;DUSP6;CDC42;MAPK9;MAPK7;HNRNPK;ERBB4;RAC2;RAC3;TAB2;RAC1;MAP2K7;MAP3K7;DLD
Thrombin signaling through protease-activated receptors	21/53	0.0962377	0.300404	0	0	1.50528	3.52376	ARFGEF1;ARFGEF2;ROCK1;ARRB2;PIK3R1;GNG11;RHOA;GNAI1;GNG13;CYTH3;GNA13;GNG10;PIK3CA;GNG5;GNG7;GNAQ;GNB1;GNB4;MAPK1;PLCB1;MAP3K7
Global genomic nucleotide excision repair (GG-NER)	14/33	0.0964711	0.300404	0	0	1.68977	3.95154	RFC5;PCNA;RFC4;RFC1;XPA;GTF2H2;GTF2H4;RAD23B;DDB2;POLD4;ERCC1;RPA3;POLD2;POLE
PIP biosynthesis at the plasma membrane	14/33	0.0964711	0.300404	0	0	1.68977	3.95154	MTMR1;MTMR3;PTEN;PIK3C2G;PIK3R2;PIK3CB;PIK3R1;SYNJ2;MTMR6;PIK3CA;INPP5D;INPP5J;PIP4K2A;PIP5K1C
Purine metabolism	58/164	0.0967102	0.300514	0	0	1.25606	2.93421	NUDT2;NUDT5;PFAS;PNP;ATIC;ZNRD1;GUK1;ENPP3;POLE;GUCY1A3;GUCY1A2;ENTPD2;GPX1;ENTPD4;PDE4C;NME4;APRT;NME1;NT5C3A;PKM;NME6;NME7;HPRT1;PRPS2;PRPS1;GMPR2;PRIM1;AK1;AK2;ADCY4;GMPR;ADCY2;PAPSS1;DGUOK;POLD4;NT5E;POLR2C;POLD2;POLR2D;POLR2H;POLR2I;ADSS;POLR2J;POLR2K;POLR2L;POLR2J3;POLR2J2;RRM2;PDE2A;POLE4;POLR3B;IMPDH2;PDE3A;POLR3F;POLR3H;PDE7B;ADA;ITPA
T cell receptor downstream signaling	10/22	0.0984254	0.30212	0	0	1.91075	4.42998	IKBKB;NFKBIA;PDPK1;INPP5D;PTEN;TAB2;BCL10;UBE2V1;MAP3K7;RELA
Hyaluronan metabolism	7/14	0.0988646	0.30212	0	0	2.29259	5.30505	HEXB;HYAL2;HEXA;HAS2;HMMR;GUSB;SLC9A1
Interleukin-6 regulation of target genes	7/14	0.0988646	0.30212	0	0	2.29259	5.30505	ABCC1;SLC38A1;LY96;ITGA5;TIMP1;SLC38A2;ICAM1
Leading strand biosynthesis	7/14	0.0988646	0.30212	0	0	2.29259	5.30505	RFC5;POLD4;PCNA;RFC4;RFC1;PRIM1;POLD2
Polyamine metabolism	7/14	0.0988646	0.30212	0	0	2.29259	5.30505	GOT1;SMOX;ADI1;ODC1;AZIN2;ENOPH1;SRM
S1P/S1P4 pathway	7/14	0.0988646	0.30212	0	0	2.29259	5.30505	CDC42;GNA13;GNAZ;MAPK1;GNAI1;RHOA;GNAI2
Sema3A-plexin repulsion signaling by inhibiting integrin adhesion	7/14	0.0988646	0.30212	0	0	2.29259	5.30505	FARP2;NRP1;RRAS;FES;PIP5K1C;RAC1;TLN1
Viral messenger RNA biosynthesis	7/14	0.0988646	0.30212	0	0	2.29259	5.30505	POLR2C;POLR2D;POLR2H;POLR2I;POLR2J;POLR2K;POLR2L
Circadian rhythm	24/62	0.100365	0.306071	0	0	1.44878	3.33067	ATF2;MED1;SREBF1;CPT1A;CREBBP;CHD9;NCOA6;NCOA3;SERPINE1;CUL1;CSNK1E;NR3C1;HIF1A;ARNTL2;RBX1;UBB;TBL1XR1;TGS1;NAMPT;UBC;EP300;RPS27A;UBA52;SKP1
Signaling by PDGF	44/122	0.1033	0.311492	0	0	1.29455	2.93877	GSK3B;CDKN1A;GSK3A;PHLPP1;PDGFB;PTEN;ADCY4;ITPR2;ITPR3;PIK3R2;ADCY2;PIK3R1;PIK3CB;THBS3;CASP9;PRKAR2A;AKT3;MLST8;SPP1;MAPK1;RICTOR;HRAS;NCK1;PDPK1;BAD;STAT1;STAT3;PTPN11;MTOR;COL4A2;PIK3CA;PRKAR1A;COL6A2;RASA1;COL6A1;CDK1;MDM2;COL4A5;KRAS;RAF1;CALM1;SOS1;CRK;BCAR1
G2/M DNA damage checkpoint	5/9	0.103545	0.311492	0	0	2.86541	6.49802	CCNB1;CHEK1;CDK1;ATM;CDC25C
Gene expression regulation by hypoxia-inducible factor	5/9	0.103545	0.311492	0	0	2.86541	6.49802	CREBBP;EP300;HIF3A;HIF1A;VEGFA
Inactivation of Cdc42 and Rac	5/9	0.103545	0.311492	0	0	2.86541	6.49802	CDC42;ARHGAP39;RAC1;SRGAP2;SRGAP1
Ketone body biosynthesis and degradation	5/9	0.103545	0.311492	0	0	2.86541	6.49802	HMGCL;BDH2;OXCT1;ACAT2;ACAT1
West Nile virus infection	5/9	0.103545	0.311492	0	0	2.86541	6.49802	CASP9;TIAL1;CASP6;CASP3;CYCS
GAB1 signalosome	16/39	0.10362	0.311492	0	0	1.59537	3.61676	GSK3B;CDKN1A;GSK3A;PHLPP1;BAD;PDPK1;PTEN;PTPN11;PIK3R1;MTOR;CASP9;PIK3CA;AKT3;MLST8;MDM2;RICTOR
Alpha-9 beta-1 integrin pathway	11/25	0.105414	0.314326	0	0	1.8016	4.05334	ITGB1;NOS2;ADAM15;SPP1;FN1;ADAM8;RAC1;SAT1;BCAR1;TGM2;VEGFA
Ghrelin pathway	11/25	0.105414	0.314326	0	0	1.8016	4.05334	SREBF1;CXCL8;CD40LG;NOS2;COX2;PLIN2;PPARG;NKX2-5;ABCG1;MYH6;ACAT1
Glutathione conjugation	11/25	0.105414	0.314326	0	0	1.8016	4.05334	GSTM4;GGT7;GSTM1;GSTA4;GSTO1;GSTP1;MGST3;GSS;MGST1;MGST2;CNDP2
Phosphoinositides and their downstream targets	11/25	0.105414	0.314326	0	0	1.8016	4.05334	EEA1;GSK3B;GSK3A;JAG1;RPS6KB1;BAD;PDPK1;GTF3A;RAC1;ARHGEF2;RAB5A
Amino sugar and nucleotide sugar metabolism	18/45	0.108822	0.322532	0	0	1.52897	3.39131	GPI;HEXB;UXS1;HEXA;PMM2;HK1;CYB5R1;CYB5R3;UGP2;GNPDA1;NAGK;AMDHD2;FPGT;UAP1L1;GNPNAT1;NANS;GALK2;GALK1
Integrin-linked kinase signaling	18/45	0.108822	0.322532	0	0	1.52897	3.39131	GSK3B;JUN;PPP1R12A;RHOG;PARVA;IQGAP1;CKAP5;AURKA;CDC42;DIAPH1;XPO1;ZEB1;CCND1;CDC37;TACC3;ZYX;RICTOR;RAC1
Wnt interactions in lipid metabolism and immune response	18/45	0.108822	0.322532	0	0	1.52897	3.39131	IL32;MAP4K2;UBE2I;DUSP1;MMP1;SIAH2;LMO2;CREM;IFI30;PEPD;DUSP6;GJA1;CCND1;PLCG2;PDCL;COX2;HES1;TCF4
ATM pathway	19/48	0.11086	0.325262	0	0	1.50264	3.30503	CDKN1A;JUN;GADD45A;H2AFX;RNF8;SMC3;CDC25C;SMC1A;TERF2;RELA;NFKBIA;RAD50;RAD51;FANCD2;CHEK1;MDM2;ATM;TP53BP1;BID
Post-translational regulation of adherens junction stability and disassembly	19/48	0.11086	0.325262	0	0	1.50264	3.30503	PTPN1;CREBBP;JUP;CTNND1;IGF2;CABLES1;IQGAP1;ZBTB33;NME1;CDC42;GNA13;SNX1;MEP1B;HGS;CASP3;CTNNA1;RAC1;HRAS;RAB5A
G-protein activation	12/28	0.111169	0.325262	0	0	1.71974	3.77778	POMC;GNAZ;GNG10;GNAT2;GNG5;GNG7;GNB1;GNB4;GNG11;GNAI1;GNAI2;GNG13
PERK-regulated gene expression	12/28	0.111169	0.325262	0	0	1.71974	3.77778	EXOSC7;EXOSC5;CXCL8;EXOSC4;EXOSC9;NFYC;EIF2AK3;ASNS;EXOSC1;DCP2;HERPUD1;ATF4
Cadmium-induced DNA biosynthesis and proliferation in macrophages	8/17	0.111285	0.325262	0	0	2.0379	4.47452	NFKBIA;JUN;MAPK1;PLCB1;RAF1;TNF;HRAS;RELA
G1/S-specific transcription	8/17	0.111285	0.325262	0	0	2.0379	4.47452	CCNA1;PCNA;RRM2;CDC45;CCNE1;CDK1;TK2;TYMS
GRB2-SOS provides linkage to MAPK signaling for integrins	8/17	0.111285	0.325262	0	0	2.0379	4.47452	RAP1A;VWF;FN1;SOS1;TLN1;CRK;PTK2;BCAR1
Cell-cell communication	46/129	0.113978	0.331376	0	0	1.27182	2.76208	ITGB1;CD151;FBLIM1;CTNND1;TESK1;PIK3R2;IQGAP1;PIK3R1;PIK3CB;WASL;F11R;CLDN1;MLLT4;NTN1;CLDN23;CTNNA1;SIRPA;FLNA;RSU1;RAC1;SPTBN1;NCK1;VASP;CADM3;JUP;DST;DCC;CASK;PARVA;PTPN11;ACTN4;PTK2;CD2AP;CLDN11;CLDN5;CLDN10;PIK3CA;PARD3;CDH10;CLDN12;CDH13;CLDN18;ITGA6;PVRL2;FERMT2;PVRL1
Non-small cell lung cancer	21/54	0.114051	0.331376	0	0	1.45956	3.16886	RB1;PDPK1;BAD;CDKN2A;ARAF;TGFA;PIK3R2;BRAF;PIK3CB;PIK3R1;CASP9;CCND1;PIK3CA;CDK4;AKT3;PLCG2;MAPK1;KRAS;RAF1;SOS1;HRAS
RANKL signaling pathway	21/54	0.114051	0.331376	0	0	1.45956	3.16886	JUN;PIK3R2;TRAF1;PIK3R1;CBL;RELA;MTOR;PTK2;ICAM1;RELB;IKBKB;CDC42;NFKBIA;MAPK9;MAPK1;TAB2;RAC1;MAP2K7;MAP3K7;SQSTM1;MAP2K6
Amino acid transport across the plasma membrane	13/31	0.115928	0.335923	0	0	1.65609	3.56851	SLC38A1;SLC6A18;SLC43A2;SLC43A1;SLC1A4;SLC3A2;SLC1A5;SLC7A11;SLC7A1;SLC6A6;SLC7A5;SLC7A9;SLC38A2
Neurotrophic factor-mediated Trk receptor signaling	23/60	0.116299	0.335923	0	0	1.42581	3.06776	NTRK1;DYNLT1;RASGRF1;STAT3;RHOG;FRS2;PTPN11;PIK3R1;RHOA;CDC42;RAP1A;EHD4;CCND1;PIK3CA;RASA1;MAPK1;KRAS;RAC1;SOS1;HRAS;CRK;DOCK1;SQSTM1
Selenium pathway	23/60	0.116299	0.335923	0	0	1.42581	3.06776	SCARB1;SERPINA3;INSR;SERPINE1;MTHFR;TXN;KMO;SOD2;TNF;ALOX15B;RELA;ICAM1;SOD1;PRDX3;PRDX2;PRDX4;IFNG;CBS;PRDX1;CTH;ALOX5AP;SAA1;LDLR
HIF-1 transcriptional activity in hypoxia	25/66	0.117817	0.339645	0	0	1.39865	2.99119	ABCB1;FECH;SERPINE1;ENO1;ETS1;HIF1A;HK1;NT5E;PGK1;EP300;EGLN1;EDN1;CREBBP;JUN;NPM1;SMAD4;SMAD3;NOS2;VEGFA;PKM;ID2;TFF3;PLIN2;ALDOA;ENG
MAP kinase signaling pathway	30/81	0.119364	0.343433	0	0	1.34943	2.86832	ATF2;RELA;IKBKB;RPS6KA4;MAPK9;MAPK7;MKNK1;RPS6KA1;MAPK1;RIPK1;RAC1;MAP2K7;MAP4K5;HRAS;MAP3K7;PAK2;MAP4K3;MAP2K6;MAP4K4;MAP2K3;MAP4K2;JUN;TGFB2;MAP3K1;STAT1;NFKBIA;RPS6KB1;MAPKAPK2;RAPGEF2;RAF1
MAPK/TRK pathway	14/34	0.119877	0.343568	0	0	1.60516	3.40502	MAP2K3;BRAF;TRPV1;MAPK7;RAP1A;EHD4;CDK5;RPS6KA1;MAPKAPK2;MAPK1;KRAS;RAF1;HRAS;MAP2K6
TOR signaling	14/34	0.119877	0.343568	0	0	1.60516	3.40502	PRKAA1;PRKAB2;PRKAG1;PRR5L;TSC1;MTOR;CDC42;RPS6KB1;RHEB;MLST8;ULK3;ULK2;RICTOR;RAC1
Apoptotic signaling in response to DNA damage	9/20	0.120926	0.343907	0	0	1.87583	3.96283	CASP9;BAD;STAT1;CASP6;CASP3;CYCS;ATM;BID;TLN1
Hypertrophy pathway	9/20	0.120926	0.343907	0	0	1.87583	3.96283	MYOG;JUND;ZEB1;IFNG;IFRD1;ANKRD1;DUSP14;VEGFA;HBEGF
ID regulation of gene expression	9/20	0.120926	0.343907	0	0	1.87583	3.96283	CDKN1A;SMARCC1;CXCL8;CCND1;CDKN2A;ITGA6;SELE;MYH6;ICAM1
RNA polymerase III abortive and retractive initiation	9/20	0.120926	0.343907	0	0	1.87583	3.96283	NFIA;POLR3B;NFIB;GTF3A;POLR3F;POLR3H;POLR2H;POLR2K;POLR2L
Activation of NMDA receptor upon glutamate binding and postsynaptic events	15/37	0.123157	0.348904	0	0	1.5635	3.27444	CAMK2D;PDPK1;RASGRF2;CAMK2A;RASGRF1;BRAF;RRAS;DLG4;RPS6KA1;AKAP9;MAPK1;CALM1;RAF1;CAMK2G;HRAS
Allograft rejection	15/37	0.123157	0.348904	0	0	1.5635	3.27444	CD40;HLA-B;HLA-A;HLA-F;TNF;HLA-G;HLA-E;HLA-DMA;HLA-DMB;CD40LG;IFNG;HLA-DPB1;IL12A;HLA-DPA1;HLA-DQB1
NF-kappaB activation through FADD/RIP-1 pathway	6/12	0.123978	0.349219	0	0	2.29237	4.78568	IKBKB;MAVS;DDX58;TRIM25;RIPK1;FADD
Phosphatidylethanolamine biosynthesis	6/12	0.123978	0.349219	0	0	2.29237	4.78568	CHKB;EPT1;CEPT1;LPIN1;LPIN2;PISD
Pyruvate dehydrogenase (PDH) complex regulation	6/12	0.123978	0.349219	0	0	2.29237	4.78568	PDP1;PDHA1;PDK3;PDHB;DLD;PDK2
Nuclear signaling by ErbB4	16/40	0.125881	0.353904	0	0	1.52879	3.1683	PSENEN;CUL1;PTPN11;PSEN1;ESR1;GFAP;RBX1;APH1A;ADAM17;APH1B;ERBB4;NRG4;PGR;TAB2;SKP1;HBEGF
CREB transcription factor and its extracellular signals	10/23	0.128507	0.359916	0	0	1.76364	3.61859	PIK3CA;PDPK1;PRKAR1A;PRKAR2A;RPS6KA1;MAPK1;PIK3R1;RAC1;SOS1;HRAS
Cyclins and cell cycle regulation	10/23	0.128507	0.359916	0	0	1.76364	3.61859	RB1;CCNA1;CDKN1A;CCNB1;CCND2;CCND1;CDKN2A;CCNE1;CDK4;CDK1
Lipid metabolism regulation by peroxisome proliferator-activated receptor alpha (PPAR-alpha)	40/112	0.130553	0.362209	0	0	1.27464	2.59513	CHD9;HMGCR;MED16;MED18;MED11;MED14;MED13;TGS1;MED31;ANKRD1;EP300;FADS1;FDFT1;ESRRA;MED1;WWTR1;SREBF1;CPT1A;CDK19;CREBBP;NCOA6;NCOA3;NFYC;TXNRD1;MED27;GRHL1;APOA5;MED6;TIAM2;MED23;NCOR2;CDK8;MED24;TBL1XR1;ACOX1;MED21;MED20;PLIN2;PPARG;ANGPTL4
Chemokine signaling pathway	65/189	0.131025	0.362209	0	0	1.20315	2.44524	GSK3B;GSK3A;CXCL8;ARRB2;PIK3CB;WASL;CXCL3;CX3CL1;CXCL16;IKBKB;PREX1;AKT3;RAC2;RAC1;CCR4;HRAS;VAV3;RHOA;TIAM2;FGR;PIK3CA;PARD3;XCL2;RAF1;PLCB1;SOS1;CRK;CCL14;ROCK1;ROCK2;ADCY4;PIK3R2;ADCY2;PIK3R1;GNAI1;RELA;GNAI2;CDC42;GNG10;RAP1A;CCL8;GRK5;CXCR1;GNG5;GRK4;CCL5;GNG7;MAPK1;CCL18;CCL15;CCR1;STAT1;STAT2;STAT3;BRAF;GNG11;PTK2;GNG13;NFKBIA;CXCL11;GNB1;GNB4;KRAS;CCL28;BCAR1
Activation of PKC through G-protein coupled receptors	4/7	0.131043	0.362209	0	0	3.05615	6.2108	NFKBIA;GNAQ;PLCB1;RELA
Apoptotic factor-mediated response	4/7	0.131043	0.362209	0	0	3.05615	6.2108	CASP9;CASP3;CYCS;XIAP
Arachidonate epoxygenase/epoxide hydrolase pathway	4/7	0.131043	0.362209	0	0	3.05615	6.2108	COX8A;CYP2C9;GSTP1;COX5A
PELP1 modulation of estrogen receptor activity	4/7	0.131043	0.362209	0	0	3.05615	6.2108	CREBBP;EP300;MAPK1;ESR1
Viral dsRNA-TLR3-TRIF complex activation of RIP1	4/7	0.131043	0.362209	0	0	3.05615	6.2108	IKBKB;RIPK1;TICAM1;RELA
FoxO family signaling	19/49	0.131526	0.362864	0	0	1.45244	2.94635	CSNK1G3;USP7;RALA;CREBBP;GADD45A;PLK1;CSNK1E;SOD2;SIRT1;IKBKB;MAPK9;CCNB1;XPO1;BCL6;EP300;SKP2;SGK1;CSNK1G2;YWHAH
Apoptotic execution phase	20/52	0.132764	0.365595	0	0	1.43336	2.89422	DFFA;GSN;ROCK1;BMX;PTK2;TJP1;H1F0;FNTA;APC;CASP6;CASP3;STK26;LMNA;HIST1H1D;DSG2;VIM;HIST1H1A;PAK2;HIST1H1B;KPNA1
TGF-beta signaling in development	11/26	0.134523	0.369751	0	0	1.68137	3.37286	ACVRL1;ACVR1;SMAD1;SMAD4;TGFB2;ACVR1C;SMAD3;BMP1;SMAD6;SPTBN1;ACVR2A
MicroRNAs in cardiomyocyte hypertrophy	31/85	0.135291	0.371169	0	0	1.31688	2.63419	GSK3B;CAMK2D;ROCK1;ROCK2;PIK3R2;PIK3CB;PIK3R1;TNF;HDAC9;LRP6;IKBKB;NPPB;PPP3CA;MAPK7;MAPK1;RAC1;MAP2K7;MAP2K6;MAP2K3;EDN1;MYEF2;PDPK1;PLA2G2A;STAT3;RHOA;MTOR;RCAN1;PIK3CA;IL6ST;RAF1;CALM1
G1 to S cell cycle control	25/67	0.135814	0.371467	0	0	1.36525	2.72568	RB1;CDKN1A;PCNA;MCM7;PRIM1;CCNB1;CCND2;CDC45;CCND1;ORC2;POLE;CDKN2A;GADD45A;CCNA1;CREB3;CCNE1;CDK4;CCNG2;RPA3;MCM3;CDK1;MDM2;MCM4;MCM5;ATM
Platelet activation, signaling and aggregation	70/205	0.135903	0.371467	0	0	1.19017	2.37536	DGKG;APP;DGKD;DAGLA;DGKA;PROS1;SERPINE1;ARRB2;PIK3CB;CLU;AKT3;RAC2;RAC1;TIMP1;VAV3;SRGN;PRKCH;VWF;PDPK1;RHOG;PLA2G4A;ACTN4;RHOA;TUBA4A;F8;PIK3CA;DGKQ;PFN1;TLN1;ALDOA;RAF1;DAGLB;SOS1;PPIA;CRK;DGKH;CD63;PDGFB;ITPR2;PIK3R2;ITPR3;PIK3R1;GNAI1;KNG1;GNAI2;CDC42;GNA13;GNG10;RAP1A;GNG5;GNG7;PLCG2;FLNA;MAPK1;STX4;A2M;PTPN1;TGFB2;FN1;GNG11;PTK2;GNG13;VEGFA;SOD1;GNAQ;GNB1;GNB4;CD9;CALM1;BCAR1
AKAP95 role in mitosis and chromosome dynamics	7/15	0.138465	0.374311	0	0	2.00587	3.96588	CCNB1;H3F3B;PRKAR2A;H3F3A;PRKAG1;CDK1;NCAPD2
ATR activation in response to replication stress	7/15	0.138465	0.374311	0	0	2.00587	3.96588	RFC5;RFC4;CDC45;RPA3;CHEK1;RAD1;CDC25C
Activation of IRF3/IRF7 mediated by TBK1/IKK epsilon	7/15	0.138465	0.374311	0	0	2.00587	3.96588	TICAM2;UBB;UBC;LY96;TICAM1;RPS27A;UBA52
Biogenic amine biosynthesis	7/15	0.138465	0.374311	0	0	2.00587	3.96588	ACHE;TPH1;AANAT;HDC;PAH;GAD2;COMT
Signaling to p38 via RIT and RIN	7/15	0.138465	0.374311	0	0	2.00587	3.96588	NTRK1;CDK1;MAPK1;BRAF;KRAS;RAF1;HRAS
TrkA receptor signaling pathway	7/15	0.138465	0.374311	0	0	2.00587	3.96588	NTRK1;DPM2;PIK3CA;PDPK1;PIK3R1;SOS1;HRAS
ADP-ribosylation factor	12/29	0.139328	0.374588	0	0	1.61847	3.18987	CYTH3;ARFGEF1;ARFGEF2;CHN1;ARHGAP1;ARAP2;ASAP1;ARAP1;KDELR3;ARHGAP5;ARFGAP3;ARFGAP1
Lipoprotein metabolism	12/29	0.139328	0.374588	0	0	1.61847	3.18987	CETP;SCARB1;BMP1;SAR1B;LCAT;APOA4;P4HB;A2M;LDLRAP1;LDLR;APOA5;ABCG1
Post-translational modification: biosynthesis of GPI-anchored proteins	12/29	0.139328	0.374588	0	0	1.61847	3.18987	DPM1;DPM2;PIGU;DPM3;PGAP1;PIGO;GPAA1;PIGP;PIGW;PIGV;PIGY;PIGX
Alanine, aspartate and glutamate metabolism	13/32	0.143179	0.383542	0	0	1.56881	3.04924	ACY3;GOT1;GPT2;GOT2;ASNS;GAD2;ALDH4A1;GLUD2;ASL;AGXT;ADSS;GLUL;NIT2
Serotonin HTR1 group and FOS pathway	13/32	0.143179	0.383542	0	0	1.56881	3.04924	MAP2K3;MAP3K1;PDPK1;RASGRF1;BRAF;GNAI1;RHOA;GNAI2;ELK4;RAP1A;PIK3CA;MAPKAPK2;MAP2K6
PIK3C1/AKT pathway	14/35	0.146264	0.391097	0	0	1.52862	2.93853	GSK3B;CDKN1A;GSK3A;PRKDC;BAD;PDPK1;MTOR;CASP9;AKT3;MLST8;RICTOR;RAF1;KPNA1;YWHAH
Chagas disease	37/104	0.147677	0.394162	0	0	1.26686	2.42315	C1QA;CXCL8;SERPINE1;PPP2R2A;PIK3R2;PIK3R1;PIK3CB;TNF;CD3D;GNAI1;RELA;GNAI2;IKBKB;MAPK9;PPP2R1B;PPP2R1A;CCL5;AKT3;MAPK1;IL12A;FADD;JUN;TGFB2;SMAD3;NOS2;IFNGR2;IRAK4;TICAM1;TNFRSF1A;NFKBIA;IFNG;PIK3CA;GNAQ;GNAS;PLCB1;MYD88;C1QC
Corticosteroids and cardioprotection	8/18	0.149051	0.396394	0	0	1.83398	3.49092	ANXA1;PIK3CA;PDPK1;GNAS;PIK3R1;NR3C1;CALM1;RELA
Nicotinic acetylcholine receptor role in the regulation of apoptosis	8/18	0.149051	0.396394	0	0	1.83398	3.49092	CHRNB1;PIK3CA;BAD;PDPK1;PIK3R1;AGRN;PTK2;YWHAH
Bioactive peptide-induced signaling pathway	16/41	0.150683	0.399296	0	0	1.46753	2.77742	CAMK2D;STAT1;CAMK2A;STAT3;PIK3R1;GNAI1;KNG1;CDK5;PIK3CA;GNB1;MAPK1;CALM1;RAF1;SOS1;CAMK2G;HRAS
Insulin biosynthesis and processing	16/41	0.150683	0.399296	0	0	1.46753	2.77742	SLC30A6;RPN2;EXOC8;SRP54;MYO5A;RAB27A;SRP14;DDOST;SRP9;SPCS3;SPCS1;SRP72;KIF5B;EXOC3;SEC11A;STX1A
HNF3A pathway	17/44	0.152215	0.402415	0	0	1.44378	2.71787	FOXA1;CREBBP;JUN;XBP1;NCOA3;AP1B1;ATP5J;C4BPB;ESR1;PISD;SOD1;NFIA;NFIB;NRIP1;EP300;NDUFV3;FOXA3
Glycerophospholipid biosynthesis	31/86	0.152405	0.402415	0	0	1.29284	2.43211	CDS1;ACHE;SLC44A2;PITPNB;TAZ;PLD1;AGPAT3;AGPAT4;PTDSS1;CEPT1;CDIPT;PLA2G12A;DGAT2;CHKB;DGAT1;PNPLA8;PLA2G2A;EPT1;MBOAT1;PLA2G4A;PISD;HADHB;GNPAT;HADHA;PLA2G16;LPCAT4;LPCAT3;LPCAT2;PEMT;LPIN1;LPIN2
Agrin in postsynaptic differentiation	18/47	0.153393	0.40355	0	0	1.42331	2.66836	CHRNA1;ITGB1;JUN;LAMA2;LAMA4;ITGA1;LAMB1;LAMC1;PTK2;CDC42;CTTN;DAG1;PAK7;MAPK1;RAC1;AGRN;UTRN;PAK2
Regulation of NFAT transcription factors	18/47	0.153393	0.40355	0	0	1.42331	2.66836	TLE4;PTPN1;JUN;CXCL8;DGKA;NFATC2;CBLB;SLC3A2;IKZF1;TNF;ITCH;CD40LG;IFNG;RNF128;CDK4;CASP3;CTLA4;PPARG
Cardiac muscle contraction	29/80	0.153655	0.40355	0	0	1.30423	2.44288	COX7B;UQCRB;COX4I1;ATP2A2;COX7A2;UQCR11;UQCR10;COX6A1;COX5B;COX7C;COX5A;COX7A1;UQCRH;SLC9A1;UQCRFS1;COX2;CACNG1;CYC1;COX8A;ATP1B1;COX6C;UQCRHL;COX6B1;COX7A2L;UQCRQ;MYL2;UQCRC1;UQCRC2;MYH6
Carbohydrate metabolism	79/235	0.15571	0.405701	0	0	1.16235	2.16168	GPI;B4GALT3;NUP107;B4GALT1;NUP188;HEXB;HEXA;ENO1;HK1;SGSH;NDST1;PPP2R1B;NAGLU;PPP2R1A;HYAL2;DSE;PGLS;GUSB;GYG1;CSGALNACT1;CHST6;G6PD;AMY1A;GLCE;CSGALNACT2;BGN;TALDO1;KERA;PGD;NUP93;B3GNT7;NUP50;NUP54;NUP98;ALDOA;TKT;LCT;SLC25A11;CHST2;B4GALT5;PRPS2;PRPS1;NUP205;POM121;SEH1L;IDUA;RPE;SDC3;HMMR;NUP160;SLC9A1;UGP2;CHST12;NUP85;TPR;PHKG2;PGK1;HAS2;NUP88;ST3GAL1;GPC6;RAE1;RANBP2;MDH1;GOT1;NUP155;MDH2;…
Activation of calcium-permeable kainate receptor	5/10	0.156895	0.405701	0	0	2.29216	4.2455	DLG1;DLG4;GRIK5;GRIK2;CALM1
Apoptotic DNA fragmentation and tissue homeostasis	5/10	0.156895	0.405701	0	0	2.29216	4.2455	TOP2A;TOP2B;DFFA;ENDOG;CASP3
IKK complex recruitment mediated by RIP1	5/10	0.156895	0.405701	0	0	2.29216	4.2455	IKBKB;TICAM2;LY96;RIPK1;TICAM1
Netrin mediated repulsion signals	5/10	0.156895	0.405701	0	0	2.29216	4.2455	DCC;UNC5B;PTPN11;NTN1;PTK2
Rheb GTPase activity by AMPK regulation	5/10	0.156895	0.405701	0	0	2.29216	4.2455	PRKAA1;PRKAB2;RHEB;PRKAG1;TSC1
Tetrahydrobiopterin (BH4) biosynthesis, recycling, salvage and regulation	5/10	0.156895	0.405701	0	0	2.29216	4.2455	GCHFR;GCH1;SPR;CALM1;PTS
IGF1 signaling pathway	9/21	0.156948	0.405701	0	0	1.71939	3.18403	JUN;CSNK2A1;PIK3CA;RASA1;PTPN11;PIK3R1;RAF1;SOS1;HRAS
Mitochondrial role in apoptotic signaling	9/21	0.156948	0.405701	0	0	1.71939	3.18403	CASP9;DFFA;ENDOG;CASP6;CASP3;XIAP;CYCS;BID;BIRC3
Lysosome vesicle biogenesis	10/24	0.162917	0.41893	0	0	1.63755	2.97135	HSPA8;BLOC1S1;DNAJC6;CLTC;AP1B1;AP1S2;AP1S1;DNASE2;AP1M1;TXNDC5
Nicotinate and nicotinamide metabolism	10/24	0.162917	0.41893	0	0	1.63755	2.97135	NT5C3A;NT5E;NNMT;PNP;NMNAT1;NAMPT;CD38;NMNAT3;ENPP3;NADSYN1
Signal transduction of S1P receptor	10/24	0.162917	0.41893	0	0	1.63755	2.97135	ASAH1;MAPK7;RACGAP1;SPHK2;AKT3;MAPK1;S1PR3;PLCB1;GNAI1;GNAI2
ADP signalling through P2Y purinoceptor 12	11/27	0.16746	0.425797	0	0	1.57617	2.81664	GNG10;GNG5;GNG7;GNB1;GNAS;GNB4;PLCB1;GNG11;GNAI1;GNAI2;GNG13
APOBEC3G-mediated resistance to HIV-1 infection	5/5	0.168184	0.425797	0	0	3.43785	6.12864	PSIP1;BANF1;PPIA
Beta-oxidation of myristoyl-CoA to lauroyl-CoA	5/5	0.168184	0.425797	0	0	3.43785	6.12864	HADHB;HADHA;ACADVL
Cyclin B2-mediated events	5/5	0.168184	0.425797	0	0	3.43785	6.12864	CCNB2;CDK1;CDC25C
FOSB gene expression and drug abuse	5/5	0.168184	0.425797	0	0	3.43785	6.12864	JUND;CDK5;FOSB
Glycoprotein hormones	5/5	0.168184	0.425797	0	0	3.43785	6.12864	CGB8;FSHB;TSHB
Ketone body metabolism	5/5	0.168184	0.425797	0	0	3.43785	6.12864	HMGCL;OXCT1;ACAT1
Phenylalanine, tyrosine and tryptophan biosynthesis	5/5	0.168184	0.425797	0	0	3.43785	6.12864	GOT1;PAH;GOT2
Polo-like kinase 3 (PLK3) pathway	5/5	0.168184	0.425797	0	0	3.43785	6.12864	PLK3;CCNE1;CDC25C
CDC42 activity regulation	12/30	0.170919	0.431242	0	0	1.52844	2.70009	ITSN2;CDC42;DOCK10;FARP2;VAV3;DNMBP;RACGAP1;APC;DOCK9;ARHGAP1;FGD1;NME1
Interferon-beta enhancer pathway	12/30	0.170919	0.431242	0	0	1.52844	2.70009	ATF2;GTF2A1;CREBBP;JUN;SMARCC1;SMARCC2;GTF2B;GTF3A;NR3C1;ARID1A;ACTB;RELA
Double stranded RNA-induced gene expression	6/13	0.173359	0.435617	0	0	1.96475	3.44301	DNAJC3;NFKBIA;EIF2AK2;EIF2S2;RELA;MAP4K4
Downregulation of ERBB2-ERBB3 signaling	6/13	0.173359	0.435617	0	0	1.96475	3.44301	UBB;AKT3;UBC;RPS27A;UBA52;RNF41
Glycoprotein VI-mediated activation cascade	13/33	0.173538	0.435617	0	0	1.49026	2.60998	VAV3;PDPK1;RHOG;PIK3R2;PIK3CB;PIK3R1;RHOA;CDC42;PIK3CA;AKT3;PLCG2;RAC2;RAC1
Glycogen metabolism	14/36	0.175495	0.438292	0	0	1.45903	2.53892	GSK3B;GSK3A;PPP2R2A;PHKB;PPP2R3B;PPP2R3A;UGP2;PPP2R1B;PPP2R4;PPP2R1A;PPP2R5E;PHKG2;CALM1;GYG1
SNARE interactions in vesicular transport	14/36	0.175495	0.438292	0	0	1.45903	2.53892	STX19;STX8;GOSR1;STX7;USE1;BET1L;STX10;VAMP1;STX4;STX2;YKT6;STX1A;BET1;VAMP3
Signaling to ERKs	14/36	0.175495	0.438292	0	0	1.45903	2.53892	NTRK1;RALA;KIDINS220;BRAF;FRS2;RAP1A;MAPKAPK2;CDK1;MAPK1;KRAS;RAF1;SOS1;HRAS;CRK
Aldosterone-regulated sodium reabsorption	16/42	0.177917	0.44261	0	0	1.41099	2.43599	PDPK1;INSR;IRS2;PIK3R2;PIK3CB;PIK3R1;ATP1B1;NR3C2;SLC9A3R2;SCNN1G;FXYD4;PIK3CA;SCNN1B;MAPK1;KRAS;SGK1
Ephrin receptor B forward pathway	22/60	0.178256	0.44261	0	0	1.32761	2.28951	YES1;ROCK1;WASL;PIK3R1;EFNA5;PTK2;FGR;CDC42;EFNB1;RAP1A;PIK3CA;RRAS;RASA1;MAPK1;KRAS;RAC1;EPHB2;HRAS;MAP3K7;CRK;NCK1;MAP4K4
Keratinocyte differentiation	21/57	0.178666	0.44261	0	0	1.33764	2.30374	MAP2K3;JUN;PRKCH;MAP3K1;TRAF1;TNFRSF1B;ETS1;TNF;RELA;TNFRSF1A;IKBKB;NFKBIA;MAPK1;RIPK1;RAF1;SOS1;MAP2K7;HRAS;BIRC3;MAP2K6;MAP4K4
Diurnally regulated genes with circadian orthologs	18/48	0.178913	0.44261	0	0	1.37577	2.36751	HIST1H2BN;IDI1;GSTM3;HSPA8;GSTP1;ZFR;NR1D2;QKI;HERPUD1;ETV6;CLDN5;HLA-DMA;UGP2;PSMA4;TUBB3;SUMO3;TAB2;EIF4G2
Energy metabolism	18/48	0.178913	0.44261	0	0	1.37577	2.36751	ESRRA;MEF2A;ATF2;GSK3B;MED1;PRKAA1;PRKAB2;MEF2B;HDAC1;PRKAG1;MEF2BNB-MEF2B;SIRT1;PPP3CA;PPP3R1;EP300;PPARG;CAMK2G;GABPA
Metabolism of vitamins and cofactors	19/51	0.179023	0.44261	0	0	1.36147	2.34206	CYB5A;MOCS2;PANK2;PANK3;GSTO1;MTHFR;NMNAT3;NADSYN1;COASY;SLC25A16;NFS1;CYB5R3;NMNAT1;PPCS;NAPRT;FPGS;NAMPT;MOCS1;SLC19A1
Amino acid biosynthesis and interconversion (transamination)	7/16	0.184419	0.450666	0	0	1.78287	3.01402	GOT1;PSAT1;GPT2;GOT2;ASNS;PHGDH;GLUL
Glyoxylate and dicarboxylate metabolism	7/16	0.184419	0.450666	0	0	1.78287	3.01402	CS;MDH1;MDH2;MTHFD2;GLYCTK;AFMID;ACO2
Hypoxia-inducible factor in the cardivascular system	7/16	0.184419	0.450666	0	0	1.78287	3.01402	EDN1;JUN;EP300;UBE2A;P4HB;HIF1A;VEGFA
Other semaphorin interactions	7/16	0.184419	0.450666	0	0	1.78287	3.01402	ITGB1;SEMA5A;SEMA4A;SEMA7A;SEMA6A;PLXND1;ITGA1
Protein kinase A (PKA) at the centrosome	7/16	0.184419	0.450666	0	0	1.78287	3.01402	NUP85;PRKAR2A;AKAP9;PRKAG1;CDK1;PCNT;RHOA
Riboflavin metabolism	7/16	0.184419	0.450666	0	0	1.78287	3.01402	MTMR1;MTMR2;ACP2;ENPP3;PHPT1;ACP1;MTMR6
SREBF and miR-33 in cholesterol and lipid homeostasis	7/16	0.184419	0.450666	0	0	1.78287	3.01402	SREBF1;PRKAA1;SCD;HMGCR;SIRT1;LDLR;MTOR
MAPK signaling pathway	103/314	0.189747	0.462921	0	0	1.12044	1.86225	ATF1;ATF2;ARAF;TNF;ELK4;RPS6KA4;FGF7;AKT3;RPS6KA1;STMN1;CHP1;MAP3K7;HMGN1;MEF2A;MAP2K3;PRKCH;MAPK8IP3;MAPK8IP1;MAPKAPK2;RAF1;ATF4;PDGFB;MEF2BNB-MEF2B;CACNA1H;STK3;PPP3R1;RAP1A;RRAS;RIPK1;MAP2K7;MAP2K6;HSPA8;JUN;TGFB2;JUND;GADD45B;H3F3B;GADD45A;H3F3A;NFATC2;BRAF;HSPA2;GADD45G;NF1;TAB2;FGF12;RASGRF2;RASGRF1;HSPB1;ARRB2;DUSP16;DUSP14;IKBKB;CASP9;PPP3CA;MECOM;CASP6;CASP3;RAC2;RAC3;RAC1;HRAS;DUSP4;MAP…
Destabilization of mRNA by butyrate response factor 1 (BRF1)	8/19	0.192079	0.467066	0	0	1.66713	2.75051	EXOSC7;EXOSC5;EXOSC4;XRN1;EXOSC9;MAPKAPK2;DCP2;EXOSC1
Resolution of abasic sites (AP sites)	8/19	0.192079	0.467066	0	0	1.66713	2.75051	SMUG1;MBD4;POLD4;FEN1;PCNA;APEX1;POLD2;XRCC1
ATM-dependent DNA damage response	29/82	0.193132	0.468854	0	0	1.25484	2.06343	GSK3B;CDKN1A;PTEN;CDC42;MAPK9;CCND2;CCND1;SCP2;PPP2R5E;RAC2;MAPK1;RAC1;MAP3K7;LDLR;JUN;SMAD4;MAP3K1;SMAD3;MLKL;BAD;INSR;SOD2;RHOA;APC;BCL6;CCNG2;MDM2;ATM;SOS1
AKT signaling pathway	9/22	0.197464	0.473331	0	0	1.58701	2.57446	CASP9;IKBKB;NFKBIA;PIK3CA;BAD;PDPK1;PIK3R1;RELA;YWHAH
Smooth muscle contraction	9/22	0.197464	0.473331	0	0	1.58701	2.57446	MYL6;ITGA1;MYL6B;SORBS1;CALM1;TLN1;SORBS3;ACTG2;MYL12B
TRAF6 mediated NF-kB activation	9/22	0.197464	0.473331	0	0	1.58701	2.57446	IKBKB;NFKBIA;APP;MAVS;MAP3K1;DDX58;SAA1;TRIM25;RELA
Long-term potentiation	25/70	0.198798	0.473331	0	0	1.27396	2.05804	CAMK2D;CAMK2A;ARAF;ITPR2;ITPR3;GRM1;PPP1CB;PPP3CA;PPP3R1;RAP1A;RPS6KA1;CHP1;EP300;MAPK1;HRAS;CAMK2G;CREBBP;PPP1R12A;BRAF;GNAQ;KRAS;PLCB1;RAF1;CALM1;ATF4
Signaling events mediated by HDAC class I	25/70	0.198798	0.473331	0	0	1.27396	2.05804	HDAC1;CHD3;HDAC8;TNF;HDAC9;RELA;XPO1;EP300;RBBP7;RANBP2;CREBBP;UBE2I;MBD2;STAT3;SIRT4;SIRT5;NUP153;SIRT1;SIRT2;GATAD2B;TNFRSF1A;WDR77;NCOR2;NFKBIA;PPARG
Binding of RNA by insulin-like growth factor 2 mRNA binding proteins (IGF2BPs/IMPs/VICKZs)	4/8	0.201109	0.473331	0	0	2.29195	3.67607	IGF2;IGF2BP1;IGF2BP2;ACTB
Integration of provirus	4/8	0.201109	0.473331	0	0	2.29195	3.67607	XRCC5;PSIP1;BANF1;PPIA
Oxygen/carbon dioxide exchange in erythrocytes	4/8	0.201109	0.473331	0	0	2.29195	3.67607	CA1;CA2;CA4;AQP1
Recruitment of repair and signaling proteins to double-strand breaks	4/8	0.201109	0.473331	0	0	2.29195	3.67607	RAD50;H2AFX;ATM;TP53BP1
S6K1 signaling	4/8	0.201109	0.473331	0	0	2.29195	3.67607	RPS6KB1;RPS6;MLST8;MTOR
SREBP control of lipid biosynthesis	4/8	0.201109	0.473331	0	0	2.29195	3.67607	SREBF1;SCAP;LDLR;MBTPS2
Shuttle for transfer of acetyl groups from mitochondria to the cytosol	4/8	0.201109	0.473331	0	0	2.29195	3.67607	CS;PDHA1;MDH1;SLC25A11
Stabilization of mRNA by HuR	4/8	0.201109	0.473331	0	0	2.29195	3.67607	SET;XPO1;ANP32A;ELAVL1
Transcription factor regulation of microRNAs related to cardiac hypertrophy	4/8	0.201109	0.473331	0	0	2.29195	3.67607	PPP3R1;MYEF2;RASGRF1;STAT3
C-Myc pathway	10/25	0.201253	0.473331	0	0	1.52827	2.45011	GSK3B;CDKN2A;FBXW7;TAF10;TAF9;ACTL6A;PIN1;SKP2;PAK2;PML
Fatty acid biosynthesis	10/25	0.201253	0.473331	0	0	1.52827	2.45011	ACAA2;ACSS2;ECHS1;SCD;ECH1;ACSL5;ACSL3;HADH;MCAT;DECR1
PIP2 hydrolysis	10/25	0.201253	0.473331	0	0	1.52827	2.45011	DGKG;DAGLA;DGKD;PRKCH;DGKA;DGKQ;ITPR2;ITPR3;DAGLB;DGKH
Regulatory RNA pathways	10/25	0.201253	0.473331	0	0	1.52827	2.45011	AGO4;POLR2C;POLR2D;AGO2;POLR2H;POLR2I;POLR2J;POLR2K;TNRC6A;POLR2L
TPO signaling pathway	10/25	0.201253	0.473331	0	0	1.52827	2.45011	JUN;CSNK2A1;PIK3CA;STAT1;RASA1;STAT3;PIK3R1;RAF1;SOS1;HRAS
Endothelins	23/64	0.20139	0.473331	0	0	1.28633	2.06136	GNAZ;EDN1;JUN;PRKCH;MMP1;ADCY4;PLA2G4A;ADCY2;RHOA;GNAI1;GNAI2;SLC9A1;CDC42;EDNRB;GNAQ;GNAS;MAPK1;RAC1;PLCB1;RAF1;HRAS;CRK;BCAR1
G-protein beta-gamma signalling	11/28	0.203884	0.476159	0	0	1.48335	2.35883	GNG10;GNG5;PDPK1;GNG7;AKT3;GNB1;GNB4;PLCB1;GNG11;RHOA;GNG13
Messenger RNA capping	11/28	0.203884	0.476159	0	0	1.48335	2.35883	RNMT;POLR2C;POLR2D;POLR2H;GTF2H2;POLR2I;SUPT5H;POLR2J;GTF2H4;POLR2K;POLR2L
RNA polymerase III transcription initiation From type 3 promoter	11/28	0.203884	0.476159	0	0	1.48335	2.35883	SNAPC5;SNAPC1;POLR3B;SNAPC2;SNAPC4;POLR3F;POLR3H;POLR2H;BDP1;POLR2K;POLR2L
TRAIL signaling pathway	11/28	0.203884	0.476159	0	0	1.48335	2.35883	IKBKB;MAP3K1;PIK3CA;TNFSF10;TNFRSF10C;MAPK1;PIK3R2;RIPK1;PIK3CB;PIK3R1;FADD
Calcineurin-dependent NFAT signaling role in lymphocytes	20/55	0.204745	0.476515	0	0	1.31022	2.07799	GSK3B;CREBBP;PRKCH;MAP3K1;CSNK2A1;BAD;NFATC2;CABIN1;PPP3CA;MAPK9;RCAN1;PPP3R1;XPO1;CASP3;RCAN2;FKBP8;CHP1;EP300;KPNA2;YWHAH
CD28 co-stimulation	12/31	0.20565	0.476515	0	0	1.44789	2.28996	CDC42;YES1;PIK3CA;PDPK1;AKT3;MLST8;PIK3R2;RICTOR;PIK3R1;RAC1;PAK2;MTOR
Prostaglandin biosynthesis and regulation	12/31	0.20565	0.476515	0	0	1.44789	2.28996	ANXA8L1;EDN1;EDNRB;ANXA1;ANXA2;ANXA4;ANXA5;ANXA6;S100A6;PLA2G4A;PTGDR;S100A10
Ras family activation regulation	12/31	0.20565	0.476515	0	0	1.44789	2.28996	LGALS3;LGALS1;RRAS;RASA4;RASGRF2;RASA1;RASGRF1;DAB2IP;NF1;KRAS;SOS1;HRAS
Signal amplification	12/31	0.20565	0.476515	0	0	1.44789	2.28996	GNA13;GNG10;GNG5;GNG7;GNAQ;GNB1;GNB4;PLA2G4A;GNG11;GNAI1;GNAI2;GNG13
EGF receptor transactivation by GPCRs in cardiac hypertrophy	13/34	0.206758	0.476862	0	0	1.4192	2.23695	EDN1;JUN;RELA;RHOA;IKBKB;NFKBIA;EDNRB;RPS6KA1;GNB1;MAPK1;RAF1;SOS1;HRAS
Induction of apoptosis through DR3 and DR4/5 death receptors	13/34	0.206758	0.476862	0	0	1.4192	2.23695	DFFA;XIAP;RELA;CASP9;NFKBIA;CASP6;CASP3;LMNA;TNFSF10;RIPK1;FADD;BID;BIRC3
Transfer RNA aminoacylation	17/46	0.207027	0.476862	0	0	1.34402	2.11671	YARS;WARS;TARS;EPRS;YARS2;FARS2;WARS2;NARS;AIMP1;AIMP2;LARS2;QARS;LARS;GARS;IARS;CARS2;AARS
Latent infection of Homo sapiens with Mycobacterium tuberculosis	14/37	0.207353	0.476862	0	0	1.39549	2.19557	ATP6V1A;ATP6V0B;ATP6V1G1;ATP6V0E1;NOS2;CYBA;TCIRG1;FGD1;MSRA;ATP6V0A4;ATP6V0E2;ATP6V1E1;ATP6V1C1;LTF
G2/M checkpoints	16/43	0.207415	0.476862	0	0	1.35863	2.13717	RFC5;RFC4;MCM7;CDC25C;CCNB2;CCNB1;CDC45;RPA3;CHEK1;ORC2;CDK1;MCM3;MCM4;ATM;MCM5;RAD1
Opioid signaling	28/80	0.216633	0.497278	0	0	1.23475	1.88861	GNAZ;ADCY4;ITPR2;ADCY2;ITPR3;GNAI1;GNAI2;PPP3CA;GNG10;PPP3R1;GNAT2;PPP2R1B;GNG5;PPP2R1A;GNG7;PRKAR2A;MAPK1;PDE4C;PLA2G4A;GNG11;GNG13;POMC;CDK5;PRKAR1A;GNB1;GNB4;PLCB1;CALM1
BTG family proteins and cell cycle regulation	5/11	0.218802	0.497615	0	0	1.91	2.90241	RB1;BTG2;CHAF1B;HOXB9;CCND1
Erythropoietin-mediated neuroprotection through NF-kB	5/11	0.218802	0.497615	0	0	1.91	2.90241	NFKBIA;CDKN1A;SOD2;HIF1A;RELA
Mammalian target of rapamycin complex 1 (mTORC1)-mediated signaling	5/11	0.218802	0.497615	0	0	1.91	2.90241	RPS6KB1;RHEB;RPS6;MLST8;MTOR
SLBP-dependent processing of replication-dependent histone pre-mRNAs	5/11	0.218802	0.497615	0	0	1.91	2.90241	LSM10;SLBP;SNRPE;SNRPD3;SNRPF
TGF-beta signaling in gastrointestinal stem cells	5/11	0.218802	0.497615	0	0	1.91	2.90241	ACVRL1;SMAD1;SMAD4;SMAD3;SPTBN1
Vitamin B5 (pantothenate) metabolism	5/11	0.218802	0.497615	0	0	1.91	2.90241	SLC25A16;PANK2;PANK3;PPCS;COASY
Interleukin-6 signaling pathway	25/71	0.222576	0.504642	0	0	1.24617	1.87236	GSK3B;HDAC1;PIK3R2;PIK3R1;CBL;HSP90B1;MAPK1;RAC1;TIMP1;A2M;HRAS;IL6R;MAP2K6;CREBBP;JUN;CSNK2A1;BAD;STAT1;STAT3;PTPN11;PIK3CA;RPS6KB1;IL6ST;RAF1;SOS1
RIG-I-like receptor signaling pathway	25/71	0.222576	0.504642	0	0	1.24617	1.87236	DDX3Y;OTUD5;CXCL8;DDX3X;IFNA2;TNF;TANK;RELA;IKBKB;MAPK9;TRIM25;IL12A;RIPK1;FADD;MAP3K7;IFNA21;IFNA13;MAP3K1;DDX58;ISG15;TMEM173;NFKBIA;MAVS;IFNE;PIN1
Oncostatin M	101/311	0.226824	0.513484	0	0	1.10363	1.63733	EPHB6;CSF3;SERPINE1;ICAM1;NPPB;MT2A;CCND1;PTTG1;KIF5B;NAMPT;SKP2;B2M;SLC16A3;NOMO1;IER3;TGM2;KRT8;ACSL5;RNASE4;LIFR;ACSL3;SEPP1;CH25H;MT1H;PGR;IL6ST;SLC27A2;MT1E;FBN2;TGFA;BCL10;HIF1A;HCAR3;NUAK1;CCNB1;PGK1;ZBTB18;JUN;CDSN;FN1;DHCR24;ESR1;MLLT11;H1F0;SLC22A7;SERPINA3;CDKN1A;DYRK3;CXCL8;FLT1;MCM7;SECTM1;GRIK2;CXCL3;CKS1B;SYNE1;ADAMTS4;TIMP2;CTSH;ITGAV;TIMP1;IL11;EDN1;SERPINB1;ANXA1;ARHGEF12;MMP1;P…
CARM1 transcriptional regulation by protein methylation	6/14	0.22923	0.515768	0	0	1.71903	2.53218	CREBBP;PRKAR1A;NCOA3;PRKAR2A;RARA;EP300
Glycosphingolipid biosynthesis: globo series	6/14	0.22923	0.515768	0	0	1.71903	2.53218	B3GALNT1;HEXB;HEXA;NAGA;GLA;ST3GAL1
Initiation of the second proteolytic cleavage of Notch receptor by receptor-ligand binding	6/14	0.22923	0.515768	0	0	1.71903	2.53218	ADAM17;JAG1;UBB;UBC;RPS27A;UBA52
MAP kinase inactivation of SMRT corepressor	6/14	0.22923	0.515768	0	0	1.71903	2.53218	NCOR2;MAP3K1;ZBTB16;RARA;RAC1;HRAS
PI3K pathway	19/53	0.234021	0.524531	0	0	1.2812	1.86074	GSK3B;GSK3A;PRKCH;PDPK1;BAD;CDKN2A;PTEN;IRS2;PIK3R1;RPS6KA4;CYTH3;PIK3CA;RPS6KB1;INPP5D;AKT3;RPS6KA1;KRAS;SOS1;HRAS
Acyl chain remodelling of phosphatidylserine	7/17	0.235613	0.524531	0	0	1.60446	2.31936	PLA2G16;PLA2G12A;LPCAT4;LPCAT3;PLA2G2A;MBOAT1;PLA2G4A
Apoptotic cleavage of cellular proteins	7/17	0.235613	0.524531	0	0	1.60446	2.31936	ROCK1;FNTA;CASP6;CASP3;STK26;BMX;PTK2
Inflammasomes	7/17	0.235613	0.524531	0	0	1.60446	2.31936	PYCARD;APP;HSP90AB1;TXNIP;NLRC4;TXN;MEFV
SHC-related events	7/17	0.235613	0.524531	0	0	1.60446	2.31936	INSR;CDK1;MAPK1;KRAS;RAF1;SOS1;HRAS
SHC1 events in EGFR signaling	7/17	0.235613	0.524531	0	0	1.60446	2.31936	CDK1;MAPK1;IRS2;KRAS;RAF1;SOS1;HRAS
SUMOylation by RanBP2 regulates transcriptional repression	7/17	0.235613	0.524531	0	0	1.60446	2.31936	RANBP2;UBE2I;XPO1;HDAC1;MDM2;NUP153;HDAC9
Cell junction organization	29/84	0.23727	0.527426	0	0	1.20903	1.73926	ITGB1;CD151;FBLIM1;CTNND1;TESK1;F11R;CLDN1;MLLT4;CLDN23;CTNNA1;FLNA;RSU1;VASP;CADM3;DST;JUP;PARVA;CLDN11;CLDN10;CLDN5;CDH10;PARD3;CLDN12;CDH13;CLDN18;ITGA6;PVRL2;FERMT2;PVRL1
Signaling by interleukins	37/109	0.238073	0.528178	0	0	1.17846	1.69129	PELI2;CUL1;PIK3R2;PIK3R1;PIK3CB;CBL;RELA;IKBKB;INPP5D;MAPK1;IL6R;MAP3K7;HRAS;SKP1;MAP2K6;YES1;STAT1;STAT3;IRAK3;PTPN11;IRAK4;RBX1;PIK3CA;IL7;TOLLIP;IL3RA;CDK1;PELI1;TAB2;KRAS;UBE2V1;IL6ST;RAF1;SOS1;SQSTM1;CRK;MYD88
Estrogen receptor signaling pathway	8/20	0.239514	0.528178	0	0	1.52809	2.18386	MAPK9;JUN;PIK3CA;GNB1;GNAS;MAPK1;BRAF;ESR1
Nerve growth factor (NGF) pathway	8/20	0.239514	0.528178	0	0	1.52809	2.18386	DPM2;JUN;CSNK2A1;PIK3CA;PIK3R1;RAF1;SOS1;HRAS
Glycosphingolipid metabolism	14/38	0.241551	0.528178	0	0	1.33725	1.8998	CTSA;ASAH1;CERK;HEXB;HEXA;GBA3;SUMF2;SUMF1;GALC;UGCG;NEU4;STS;NEU1;GLA
Triglyceride biosynthesis	14/38	0.241551	0.528178	0	0	1.33725	1.8998	ELOVL1;DGAT2;DGAT1;ELOVL4;ELOVL5;TECR;ACSL5;ELOVL6;ACSL3;AGPAT3;AGPAT4;LPCAT4;LPIN1;LPIN2
Deadenylation of mRNA	9/23	0.241793	0.528178	0	0	1.47355	2.09196	EIF4A2;EIF4A1;CNOT6L;CNOT7;PAN3;CNOT1;RQCD1;PABPC1;CNOT8
Mismatch repair	9/23	0.241793	0.528178	0	0	1.47355	2.09196	RFC5;POLD4;PCNA;RFC4;RFC1;RPA3;POLD2;RPA4;SSBP1
Post-elongation processing of intronless pre-mRNA	9/23	0.241793	0.528178	0	0	1.47355	2.09196	LSM10;SLBP;NUDT21;CPSF1;PABPN1;CLP1;SNRPE;SNRPD3;SNRPF
Signaling events mediated by the hedgehog family	9/23	0.241793	0.528178	0	0	1.47355	2.09196	LRPAP1;STIL;TGFB2;HHAT;PIK3CA;DHH;BOC;ARRB2;PIK3R1
Signal transduction by L1	13/35	0.242504	0.528178	0	0	1.35459	1.9191	ITGB1;NRP1;CSNK2A1;CLTC;CSNK2A2;AP2B1;RPS6KA4;RPS6KA1;CSNK2B;MAPK1;ITGAV;RAC1;ITGA5
Estrogen receptor transcription factor targets	10/26	0.242959	0.528178	0	0	1.43265	2.027	SPEN;NCOR2;MED1;CREBBP;NCOA3;DBT;NRIP1;PGR;PHB2;ESR1
Fibroblast growth factor 1	10/26	0.242959	0.528178	0	0	1.43265	2.027	CDKN1A;CCND1;ODC1;SERPINE1;IGF2;COX2;S1PR3;PPARG;TCF4;VEGFA
PGC-1a regulation	10/26	0.242959	0.528178	0	0	1.43265	2.027	ESRRA;MEF2A;PPP3CA;CAMK2D;CAMK2A;CAMK1;CALM1;MEF2BNB-MEF2B;CAMK2G;YWHAH
Alpha-synuclein signaling	12/32	0.243133	0.528178	0	0	1.3754	1.94501	FGR;UCHL1;TOR1A;YES1;GRK5;CSNK2A1;BAD;MAPK1;STUB1;PARK7;PLD1;PARK2
Statin pathway	11/29	0.243334	0.528178	0	0	1.40084	1.97984	CETP;SCARB1;SQLE;LRP1;DGAT1;LCAT;APOA4;HMGCR;LDLR;APOA5;FDFT1
Transferrin endocytosis and recycling	11/29	0.243334	0.528178	0	0	1.40084	1.97984	ATP6V1A;ATP6V0B;ATP6V1G1;ATP6V0E1;INSR;ATP6V0A4;TCIRG1;ATP6V0E2;ATP6V1E1;MCOLN1;ATP6V1C1
Leishmaniasis	25/72	0.247588	0.535835	0	0	1.21957	1.70251	ITGB1;ITGAM;TNF;RELA;HLA-DMA;HLA-DMB;MAPK1;IL12A;MAP3K7;HLA-DPA1;JUN;MARCKSL1;TGFB2;NOS2;STAT1;IFNGR2;CYBA;IRAK4;NFKBIA;IFNG;HLA-DPB1;TAB2;FCGR2C;MYD88;HLA-DQB1
Sphingolipid metabolism	25/72	0.247588	0.535835	0	0	1.21957	1.70251	ASAH1;CERK;HEXB;HEXA;GBA3;UGCG;COL4A3BP;NEU4;SGPL1;SPTLC1;STS;NEU1;KDSR;CTSA;CERS5;SPHK2;SUMF2;SUMF1;GALC;VAPB;PPAP2B;DEGS1;GLA;CSNK1G2;CERS2
TNF-alpha effects on cytokine activity, cell motility, and apoptosis	45/135	0.254548	0.550093	0	0	1.14663	1.5689	DEFB103B;CSF3;CD40;CXCL8;CSF1;FLT4;TAF9;PDGFB;ATP5J;TAPBPL;CXCL3;ETS1;TNF;CX3CL1;ICAM1;RELB;UBD;CCL5;DBT;NRIP1;TNFSF10;CD58;CCR1;TGFB2;JAG1;SMAD3;GPX1;FNBP1;IFNGR2;TFPI2;SAMD4A;ABCA7;INHBA;TRAF1;SOD2;SELE;NFKBIA;CXCL11;CD40LG;IL7;ITGA5;RAPGEF5;ABCG1;BIRC3;HBEGF
SHP2 signaling	20/57	0.26115	0.558988	0	0	1.23922	1.66385	NTRK1;STAT1;PDGFB;FRS2;PTPN11;PIK3R1;MLLT4;ARHGAP35;RHOA;GNAI1;VEGFA;IFNG;PIK3CA;KDR;KRAS;IL6ST;RAF1;SOS1;HRAS;IL6R
G beta-gamma signaling through PI3K gamma	3/6	0.26283	0.558988	0	0	2.29174	3.06232	PDPK1;GNB1;RHOA
Influenza factor interactions with host	3/6	0.26283	0.558988	0	0	2.29174	3.06232	PABPN1;EIF2AK2;SLC25A6
Low-density lipoprotein (LDL) pathway during atherogenesis	3/6	0.26283	0.558988	0	0	2.29174	3.06232	CSF1;LDLR;ACAT1
Methionine salvage pathway	3/6	0.26283	0.558988	0	0	2.29174	3.06232	GOT1;ADI1;ENOPH1
Mitochondrial beta-oxidation of unsaturated fatty acids	3/6	0.26283	0.558988	0	0	2.29174	3.06232	HADHB;HADHA;DECR1
Molybdenum cofactor biosynthesis	3/6	0.26283	0.558988	0	0	2.29174	3.06232	MOCS2;NFS1;MOCS1
NF-kappaB activation	3/6	0.26283	0.558988	0	0	2.29174	3.06232	NFKBIA;SQSTM1;RELA
Pyrimidine biosynthesis	3/6	0.26283	0.558988	0	0	2.29174	3.06232	DCTD;DUT;TYMS
RSK activation	3/6	0.26283	0.558988	0	0	2.29174	3.06232	PDPK1;RPS6KA1;MAPK1
eIF4E release	3/6	0.26283	0.558988	0	0	2.29174	3.06232	RHEB;MLST8;MTOR
Arginine and proline metabolism	19/54	0.263928	0.560514	0	0	1.2445	1.65778	ARG2;GOT1;NOS2;ODC1;GOT2;AZIN2;SAT2;SAT1;SRM;ALDH3A2;ALDH4A1;GLUD2;P4HA1;ASL;LAP3;CKB;GLUL;ALDH7A1;ALDH9A1
Presenilin action in Notch and Wnt signaling	17/48	0.269503	0.571533	0	0	1.25713	1.64831	PSENEN;GSK3B;CREBBP;JUN;TLE1;CSNK2A1;HDAC1;PSEN1;LRP6;APH1A;ADAM17;APH1B;CCND1;APC;NEDD4;MAPK1;MAP3K7
Bladder cancer	15/42	0.275036	0.579041	0	0	1.27351	1.64391	RB1;CDKN1A;CXCL8;CDKN2A;MMP1;ARAF;BRAF;VEGFA;CCND1;CDK4;MDM2;MAPK1;KRAS;RAF1;HRAS
Eukaryotic transcription initiation	15/42	0.275036	0.579041	0	0	1.27351	1.64391	GTF2A2;TAF13;GTF2B;TAF9;GTF2H2;GTF2H4;GTF2E2;POLR3B;POLR2C;TAF7;POLR3H;POLR2H;POLR2I;POLR2J;POLR2K
Netrin-1 signaling	15/42	0.275036	0.579041	0	0	1.27351	1.64391	TRIO;MYO10;DCC;UNC5B;SIAH2;PTPN11;WASL;NTN1;PTK2;CDC42;ABLIM1;RAC1;NEO1;DOCK1;NCK1
Urokinase-type plasminogen activator (uPA) and uPAR-mediated signaling	15/42	0.275036	0.579041	0	0	1.27351	1.64391	ITGB1;ITGAM;LRP1;SERPINE1;FN1;FPR3;VLDLR;MMP13;ITGAV;RAC1;ITGA5;CRK;CTRC;DOCK1;BCAR1
Long-term depression	24/70	0.277089	0.579041	0	0	1.19613	1.53513	GUCY1A3;GUCY1A2;GNAZ;GRID2;PLA2G12A;PLA2G2A;ARAF;PLA2G4A;ITPR2;ITPR3;BRAF;GRM1;GNAI1;GNAI2;GNA13;PPP2R1B;PPP2R1A;GNAQ;GNAS;MAPK1;KRAS;PLCB1;RAF1;HRAS
Angiotensin II-mediated activation of JNK pathway via Pyk2-dependent signaling	14/39	0.277744	0.579041	0	0	1.28367	1.64445	MAP2K3;MEF2A;ATF2;JUN;MAP3K1;MEF2BNB-MEF2B;GNAQ;MAPK1;RAC1;CALM1;RAF1;SOS1;HRAS;BCAR1
Benzo(a)pyrene metabolism	4/9	0.27916	0.579041	0	0	1.83343	2.3394	AKR1C1;AKR1A1;AKR1C3;AKR1C2
EGFR transactivation by gastrin	4/9	0.27916	0.579041	0	0	1.83343	2.3394	KRAS;SOS1;HRAS;HBEGF
PPAR-gamma coactivator role in obesity and thermogenesis	4/9	0.27916	0.579041	0	0	1.83343	2.3394	MED1;CREBBP;EP300;PPARG
cAMP receptor, G-protein-independent pathways inferred from amoeba model	4/9	0.27916	0.579041	0	0	1.83343	2.3394	STAT1;STAT2;STAT3;MAPK1
PI3K/PLC/TRK pathway	13/36	0.280379	0.579041	0	0	1.2956	1.6475	NTRK1;GSK3B;BAD;PDPK1;CAMK2A;PIK3R1;TRPV1;CCND1;PIK3CA;KRAS;SOS1;HRAS;YWHAH
Glucagon signaling in metabolic regulation	12/33	0.282902	0.579041	0	0	1.30981	1.65384	GNG10;GNG5;PRKAR1A;GNG7;PRKAR2A;GNB1;ADCY4;GNAS;GNB4;ADCY2;GNG11;GNG13
PDGFA signaling pathway	11/30	0.285258	0.579041	0	0	1.32702	1.66456	JUN;MAP3K1;CSNK2A1;PIK3CA;STAT1;RASA1;STAT3;PIK3R1;RAF1;SOS1;HRAS
p38-alpha and p38-beta regulation	11/30	0.285258	0.579041	0	0	1.32702	1.66456	CDC42;MAP2K3;FGR;RALA;YES1;DUSP1;RIPK1;RAC1;DUSP16;PAK2;MAP2K6
Activation of chaperones by ATF6 alpha	5/12	0.286534	0.579041	0	0	1.63702	2.04611	XBP1;NFYC;MBTPS2;ATF4;HSP90B1
Alanine and aspartate metabolism	5/12	0.286534	0.579041	0	0	1.63702	2.04611	GOT1;GOT2;GAD2;ASL;AGXT
D4-GDI signaling pathway	5/12	0.286534	0.579041	0	0	1.63702	2.04611	CASP9;JUN;CASP3;ARHGDIB;ARHGAP5
Inhibition of replication initiation of damaged DNA by RB1/E2F1	5/12	0.286534	0.579041	0	0	1.63702	2.04611	RB1;PPP2R1B;PPP2R1A;PRIM1;PPP2R3B
Peptide hormone biosynthesis	5/12	0.286534	0.579041	0	0	1.63702	2.04611	POMC;FSHB;INHBB;INHBA;TSHB
BAD phosphorylation regulation	10/27	0.28737	0.579041	0	0	1.34828	1.68128	PIK3CA;BAD;PDPK1;PRKAR1A;PRKAR2A;RPS6KA1;IL3RA;MAPK1;PIK3R1;YWHAH
Collecting duct acid secretion	10/27	0.28737	0.579041	0	0	1.34828	1.68128	ATP6V1A;ATP6V1G1;ATP6V0E1;CA2;ATP6V0A4;TCIRG1;ATP6V0E2;ATP6V1E1;SLC12A7;ATP6V1C1
Mammalian calpain regulation of cell motility	10/27	0.28737	0.579041	0	0	1.34828	1.68128	ITGB1;CAST;PRKAR1A;PRKAR2A;MYL2;MAPK1;CAPN1;RAC1;TLN1;HRAS
RNA polymerase III transcription initiation from type 2 promoter	10/27	0.28737	0.579041	0	0	1.34828	1.68128	GTF3C1;GTF3C5;POLR3B;GTF3A;POLR3F;POLR3H;POLR2H;BDP1;POLR2K;POLR2L
RORA activates circadian expression	10/27	0.28737	0.579041	0	0	1.34828	1.68128	MED1;SREBF1;CPT1A;CREBBP;CHD9;NCOA6;TBL1XR1;TGS1;NCOA3;EP300
TWEAK regulation of gene expression	10/27	0.28737	0.579041	0	0	1.34828	1.68128	SMAD1;CXCL8;TNFRSF12A;BGLAP;MMP1;CCL5;SERPINE1;SPP1;TNF;ICAM1
Inhibition of cellular proliferation by Gleevec	9/24	0.289118	0.579041	0	0	1.37521	1.70653	JUN;MAP3K1;PIK3CA;BAD;STAT1;PIK3R1;RAF1;SOS1;HRAS
Tumor suppressor Arf inhibits ribosomal biogenesis	9/24	0.289118	0.579041	0	0	1.37521	1.70653	RB1;PIK3CA;CDKN2A;MDM2;ATM;PIK3R1;UBE2A;RAC1;HSPA1A
Arf6 vesicle-mediated transport	6/15	0.289741	0.579041	0	0	1.52792	1.89274	MAPK1;RAC1;PLD1;RAB11A;RHOA;NME1
Association of licensing factors with the pre-replicative complex	6/15	0.289741	0.579041	0	0	1.52792	1.89274	UBB;GMNN;ORC2;UBC;RPS27A;UBA52
Bile acid and bile salt biosynthesis via 7-alpha-hydroxycholesterol	6/15	0.289741	0.579041	0	0	1.52792	1.89274	CYP27A1;AMACR;SCP2;HSD17B4;ABCB11;SLC27A2
Glycosaminoglycan biosynthesis: keratan sulfate	6/15	0.289741	0.579041	0	0	1.52792	1.89274	B4GALT3;CHST6;B4GALT1;B3GNT7;ST3GAL1;CHST2
HDL-mediated lipid transport	6/15	0.289741	0.579041	0	0	1.52792	1.89274	CETP;SCARB1;BMP1;LCAT;A2M;ABCG1
Hematopoiesis regulation by cytokines	6/15	0.289741	0.579041	0	0	1.52792	1.89274	IL11;CSF3;CXCL8;CSF1;IL7;IL9
Interleukin-17 signaling pathway	6/15	0.289741	0.579041	0	0	1.52792	1.89274	CSF3;CXCL8;CD58;CD3D;CD34;IL17A
Lagging strand processive biosynthesis	6/15	0.289741	0.579041	0	0	1.52792	1.89274	POLD4;FEN1;PCNA;PRIM1;RPA3;POLD2
Stress induction of HSP regulation	6/15	0.289741	0.579041	0	0	1.52792	1.89274	CASP9;CASP3;MAPKAPK2;HSPB1;CYCS;TNF
CD28-dependent PI3K/Akt signaling	8/21	0.290324	0.579041	0	0	1.41045	1.74438	PIK3CA;PDPK1;AKT3;MLST8;PIK3R2;RICTOR;PIK3R1;MTOR
PKC-catalyzed phosphorylation of inhibitory phosphoprotein of myosin phosphatase	8/21	0.290324	0.579041	0	0	1.41045	1.74438	GNA13;TRIO;ROCK1;GNAQ;MYL2;GNB1;ARHGAP5;PLCB1
Presynaptic function of kainate receptors	8/21	0.290324	0.579041	0	0	1.41045	1.74438	GNG10;GNG5;GNG7;GNB1;GNB4;PLCB1;GNG11;GNG13
Prion pathway	8/21	0.290324	0.579041	0	0	1.41045	1.74438	PRNP;LAMA2;DNAJB6;LAMA4;LAMB1;RPSA;LAMC1;GFAP
Botulinum neurotoxicity	7/18	0.290697	0.579041	0	0	1.4585	1.80194	STX8;STX7;VAMP1;STX4;STX2;STX1A;STX10
CBL signaling regulation	7/18	0.290697	0.579041	0	0	1.4585	1.80194	YES1;PIK3CA;PIK3R2;PIK3CB;PIK3R1;CBL;CRK
Fatty acyl-CoA biosynthesis	7/18	0.290697	0.579041	0	0	1.4585	1.80194	ELOVL1;ELOVL4;ELOVL5;TECR;ACSL5;ELOVL6;ACSL3
Phosphatidylcholine biosynthesis	7/18	0.290697	0.579041	0	0	1.4585	1.80194	ACHE;CHKB;SLC44A2;PEMT;CEPT1;LPIN1;LPIN2
Serotonin receptor 4/6/7 and NR3C signaling	7/18	0.290697	0.579041	0	0	1.4585	1.80194	ATF1;ELK4;RAP1A;MAPKAPK2;GNAS;BRAF;NR3C1
Tryptophan metabolism	20/58	0.291378	0.579615	0	0	1.20652	1.4878	TPH1;WARS;ECHS1;DHCR24;KMO;HSD17B10;ACAT2;ACAT1;WARS2;ALDH3A2;HADHA;AANAT;AFMID;UBR5;MDM2;OGDH;HADH;IDO2;ALDH7A1;ALDH9A1
Apoptosis modulation and signaling	27/80	0.292914	0.581886	0	0	1.16791	1.43405	HTRA2;CASP9;IKBKB;CASP6;BAG3;CASP3;TNFSF10;BMF;FADD;BID;DFFA;JUN;ENDOG;BAD;CDKN2A;TNFRSF10C;HN1;TNFRSF1B;TNFRSF1A;NFKBIA;TOLLIP;MADD;BIRC5;CYCS;BIRC6;MYD88;BIRC3
TAp63 pathway	19/55	0.295163	0.584779	0	0	1.20985	1.47629	NQO1;CDKN1A;JAG1;DST;CDKN2A;GADD45A;GDF15;PLK1;CABLES1;WWP1;AEN;PML;IKBKB;ITCH;TP53I3;MDM2;EP300;FLOT2;ADA
Vibrio cholerae infection	19/55	0.295163	0.584779	0	0	1.20985	1.47629	ATP6V1A;SLC12A2;ATP6V0B;ATP6V1G1;ATP6V0E1;ATP6AP1;TCIRG1;ACTB;ACTG1;TJP1;SEC61G;PLCG2;GNAS;ATP6V0A4;SEC61B;KDELR3;ATP6V1E1;ATP6V0E2;ATP6V1C1
Interleukin-2 receptor beta chain in T cell activation	18/52	0.299039	0.590873	0	0	1.21357	1.46499	RB1;PCNA;PDPK1;BAD;PIK3R1;CBL;CCNA1;CCNB1;CCND2;CCND1;PIK3CA;RPS6KB1;CCNE1;MAPK1;RAF1;SOS1;HRAS;PPIA
Signaling events mediated by stem cell factor receptor (c-Kit)	18/52	0.299039	0.590873	0	0	1.21357	1.46499	GSK3B;CREBBP;PDPK1;BAD;STAT1;PTPRO;STAT3;PTEN;PTPN11;PIK3R1;CBL;SPRED2;FER;PIK3CA;RPS6KB1;RAF1;SOS1;HRAS
Antigen-activated B-cell receptor generation of second messengers	68/211	0.302658	0.597124	0	0	1.09049	1.30329	ATF2;GSK3B;IFITM1;CD40;GSK3A;SH3KBP1;CD81;PTEN;CBLB;PIK3CB;ETS1;IKBKB;PPP3CA;AKT3;RPS6KA1;RAC2;REV3L;RAC3;CHP1;RAC1;HRAS;MAP3K7;GTF2I;NCK1;VAV3;CR2;PRKCH;CSNK2A1;PDPK1;PIK3CA;RASA1;ORAI1;HCLS1;RAF1;SOS1;CRK;CAMK2A;ITPR2;PIK3R2;ITPR3;BCL10;PIK3R1;CBL;RELA;CDC42;MAPK9;PPP3R1;MAPK7;INPP5D;PRDX1;PLCG2;SH3BP5;MAPK1;PIP5K1C;CAMK2G;MAP2K6;JUN;MAP3K1;BAD;NFATC2;BRAF;PTPN11;NFKBIA;CD40LG;BCL6;REL;KRAS;CAL…
G alpha 12 pathway	17/49	0.303012	0.597124	0	0	1.21775	1.45398	MAP2K3;MEF2A;VAV3;JUN;MAP3K1;NR1I2;PLD1;MEF2BNB-MEF2B;RHOA;PTK2;MAPK9;MAPK7;MAPK1;KRAS;RAF1;HRAS;MAP2K6
Cell differentiation by G alpha (i/o) pathway inferred from mouse Neuro2A model	15/43	0.311261	0.610932	0	0	1.22794	1.43315	MAP2K3;ASAH1;RALA;CREBBP;STAT3;BRAF;RAP1A;AKT3;DAG1;MAPK1;KRAS;RAF1;HRAS;CRK;MAP2K6
Insulin secretion regulation by glucagon-like peptide-1	15/43	0.311261	0.610932	0	0	1.22794	1.43315	KCNB1;ITPR2;ITPR3;IQGAP1;GNG11;GNG13;GNG10;RAP1A;GNG5;PRKAR1A;GNG7;PRKAR2A;GNB1;GNAS;GNB4
Type 1 diabetes mellitus	15/43	0.311261	0.610932	0	0	1.22794	1.43315	HLA-B;GAD2;HLA-A;HLA-F;TNF;HLA-G;HSPD1;HLA-E;HLA-DMA;HLA-DMB;IFNG;HLA-DPB1;IL12A;HLA-DPA1;HLA-DQB1
ERK1/ERK2 MAPK pathway	22/65	0.313525	0.614558	0	0	1.17282	1.36032	ATF1;ITGB1;DUSP4;BAD;STAT3;ARAF;BRAF;DUSP6;RPS6KA4;MOS;DPM2;RAP1A;RPS6KB1;ERBB4;MKNK1;RPS6KA1;GNAS;MAPK1;KRAS;RAF1;SOS1;HRAS
ECM-receptor interaction	28/84	0.315045	0.616719	0	0	1.14622	1.32393	ITGB1;LAMA2;COL11A1;LAMA4;SDC3;LAMC1;HMMR;THBS3;RELN;SV2B;SV2A;DAG1;SPP1;TNR;ITGAV;VWF;ITGA2;ITGA1;LAMB4;FN1;LAMB1;COL4A2;COL6A2;COL6A1;ITGA7;ITGA6;ITGA5;AGRN
CD40/CD40L signaling	11/31	0.329043	0.643268	0	0	1.26058	1.40121	FCAMR;NFKBIA;MAPK9;CD40;JUN;MAP3K1;CD40LG;CBLB;TRAF1;RELA;BIRC3
Costimulation by the CD28 family	24/72	0.333594	0.645497	0	0	1.14613	1.25825	YES1;PDPK1;PIK3R2;PTPN11;PDCD1LG2;PIK3R1;CD3D;MTOR;CDC42;PPP2R1B;PIK3CA;PPP2R1A;PPP2R5E;AKT3;MLST8;HLA-DPB1;CTLA4;RICTOR;RAC1;PAK2;ICOSLG;HLA-DQB2;HLA-DPA1;HLA-DQB1
Dual incision reaction in TC-NER	10/28	0.333751	0.645497	0	0	1.27328	1.39725	POLR2C;ERCC1;POLR2D;POLR2H;GTF2H2;POLR2I;POLR2J;GTF2H4;POLR2K;POLR2L
Extension of telomeres	10/28	0.333751	0.645497	0	0	1.27328	1.39725	RFC5;POLD4;FEN1;PCNA;RFC4;RFC1;PRIM1;RPA3;POLD2;POLE
Multi-step regulation of transcription by PITX2	10/28	0.333751	0.645497	0	0	1.27328	1.39725	GSK3B;MED1;CREBBP;CCND2;PROC;CSNK2A1;APC;HDAC1;EP300;LRP6
Ck1/Cdk5 regulation by type 1 glutamate receptors	9/25	0.338543	0.645497	0	0	1.28917	1.39631	PPP3CA;CDK5;PRKAR1A;PRKAR2A;NCS1;GNB1;GNAS;PLCB1;GRM1
DARPP-32 events	9/25	0.338543	0.645497	0	0	1.28917	1.39631	PPP3CA;PPP3R1;PPP2R1B;CDK5;PPP2R1A;PRKAR1A;PRKAR2A;PDE4C;CALM1
Metal ion solute carrier family (SLC) transporters	9/25	0.338543	0.645497	0	0	1.28917	1.39631	SLC30A6;SLC30A3;SLC39A5;SLC39A10;SLC39A8;SLC39A7;SLC39A1;SLC39A14;SLC39A4
SHC1 events in ERBB2 signaling	9/25	0.338543	0.645497	0	0	1.28917	1.39631	ERBB4;NRG4;CDK1;MAPK1;KRAS;RAF1;SOS1;HRAS;HBEGF
NOD signaling pathway	28/85	0.341646	0.645497	0	0	1.12603	1.20934	CXCL8;HSP90AB1;XIAP;NLRC4;MEFV;TNF;RELA;HSP90B1;CASP9;IKBKB;PYCARD;MAPK9;CCL8;CCL5;MAPK1;RAC1;MAP3K7;MAP2K6;CARD8;CARD9;ERBB2IP;NFKBIA;COPS6;ITCH;TRIP6;TAB2;UBE2V1;BIRC3
LKB1 signaling events	16/47	0.343041	0.645497	0	0	1.18298	1.26568	GSK3B;PRKAA1;SMAD4;CAB39;STRADB;PRKAG1;TSC1;ESR1;MTOR;STK11;CDC37;STK26;MLST8;SIK1;MARK4;YWHAH
Nucleotide-binding domain, leucine rich repeat containing receptor (NLR) signaling pathways	16/47	0.343041	0.645497	0	0	1.18298	1.26568	APP;HSP90AB1;CARD9;NLRC4;TXN;MEFV;CASP9;IKBKB;PYCARD;ITCH;TXNIP;TAB2;UBE2V1;MAP3K7;MAP2K6;BIRC3
Beta-alanine metabolism	8/22	0.343388	0.645497	0	0	1.30961	1.39983	ALDH3A2;HADHA;ECHS1;GAD2;ALDH7A1;CNDP1;SRM;ALDH9A1
CTLA4 inhibitory signaling	8/22	0.343388	0.645497	0	0	1.30961	1.39983	YES1;PPP2R1B;PDPK1;PPP2R1A;PPP2R5E;AKT3;CTLA4;PTPN11
Double-strand break repair	8/22	0.343388	0.645497	0	0	1.30961	1.39983	RAD50;RAD51;PRKDC;XRCC5;RPA3;H2AFX;ATM;TP53BP1
Epstein-Barr virus LMP1 signaling	8/22	0.343388	0.645497	0	0	1.30961	1.39983	IKBKB;CXCL8;CCL5;MAPK1;TRAF1;TNF;MAP3K7;RELA
Fanconi anemia pathway	8/22	0.343388	0.645497	0	0	1.30961	1.39983	UBB;FANCD2;UBE2T;UBC;ATM;RPS27A;PALB2;UBA52
Beta-1 integrin cell surface interactions	22/66	0.34382	0.645497	0	0	1.14608	1.22359	ITGB1;LAMA2;CD81;ITGA2;COL11A1;LAMA4;ITGA1;FN1;LAMB1;LAMC1;VEGFA;MDK;COL6A2;COL7A1;COL6A1;SPP1;COL4A5;ITGA7;ITGAV;ITGA6;ITGA5;TGM2
IGF-1 receptor and longevity	7/19	0.348224	0.645497	0	0	1.33686	1.41027	PIK3CA;PDPK1;PIK3R1;SOD2;SOS1;HRAS;SOD1
STAT3 pathway	7/19	0.348224	0.645497	0	0	1.33686	1.41027	STAT3;RAC2;MAPK1;RAC3;RAC1;IL6R;MTOR
Signaling by NODAL	7/19	0.348224	0.645497	0	0	1.33686	1.41027	DRAP1;SMAD4;SMAD3;ACVR1C;ACVR2A;CFC1;CER1
TP53 network	7/19	0.348224	0.645497	0	0	1.33686	1.41027	CDKN1A;CDKN2A;GADD45A;MDM2;TNFSF10;ATM;BID
Lysine degradation	15/44	0.348658	0.645497	0	0	1.18551	1.24913	SETD2;ECHS1;SETDB2;SETMAR;PLOD2;ASH1L;ACAT2;ACAT1;ALDH3A2;HADHA;OGDH;HADH;ALDH7A1;WHSC1L1;ALDH9A1
G-protein signaling pathways	31/95	0.352813	0.645497	0	0	1.11031	1.15674	GNAZ;ADCY4;ADCY2;AKAP2;GNAI1;GNAI2;SLC9A1;AKAP12;GNA13;AKAP13;PPP3CA;GNG10;AKAP11;GNG5;RRAS;GNG7;PRKAR2A;HRAS;PRKCH;PDE4C;GNG11;RHOA;GNG13;PRKAR1A;GNAQ;AKAP9;GNB1;GNAS;KRAS;PDE7B;CALM1
DNA-PK pathway in nonhomologous end joining	6/16	0.352933	0.645497	0	0	1.37503	1.43206	CSNK2A1;PRKDC;XRCC5;CSNK2A2;APLF;CSNK2B
Inhibition of platelet activation by aspirin	6/16	0.352933	0.645497	0	0	1.37503	1.43206	ITGB1;PLA2G4A;MAPK1;PLCB1;RAF1;HRAS
Interleukin-10 anti-inflammatory signaling pathway	6/16	0.352933	0.645497	0	0	1.37503	1.43206	STAT1;STAT3;BLVRB;TNF;BLVRA;MAP2K6
Interleukin-9 signaling pathway	6/16	0.352933	0.645497	0	0	1.37503	1.43206	STAT1;STAT3;IL9;MAPK1;PIK3R2;PIK3R1
N-glycan precursor substrate biosynthesis	6/16	0.352933	0.645497	0	0	1.37503	1.43206	DPM1;DPM2;DPM3;ALG5;PMM2;GNPNAT1
Primary bile acid biosynthesis	6/16	0.352933	0.645497	0	0	1.37503	1.43206	CYP27A1;CYP39A1;CH25H;AMACR;SCP2;HSD17B4
Selenium metabolism and selenoproteins	6/16	0.352933	0.645497	0	0	1.37503	1.43206	SELENBP1;JUN;RPL30;CREM;TRNAU1AP;RELA
Serotonin receptor 2 and ELK-SRF/GATA4 signaling	6/16	0.352933	0.645497	0	0	1.37503	1.43206	ELK4;GNAQ;RASGRF1;MAPKAPK2;HTR2B;RAF1
Fc epsilon receptor I signaling in mast cells	14/41	0.354532	0.645497	0	0	1.18841	1.23233	JUN;MAP3K1;NFATC2;PLA2G4A;PIK3R1;PPP3CA;PIK3CA;MAPK1;MAP2K7;CALM1;RAF1;SOS1;HRAS;PAK2
Death receptor signaling	5/13	0.357268	0.645497	0	0	1.43229	1.47421	TNFSF10;RIPK1;FADD;TNF;TNFRSF1A
HIV life cycle early phase	5/13	0.357268	0.645497	0	0	1.43229	1.47421	FEN1;XRCC5;PSIP1;BANF1;PPIA
Keap1-Nrf2 pathway	5/13	0.357268	0.645497	0	0	1.43229	1.47421	NQO1;AIMP2;PIK3CA;KEAP1;EPHB2
MAP kinase downregulation by phosphorylation of MEK1 by Cdk5/p35	5/13	0.357268	0.645497	0	0	1.43229	1.47421	DPM2;CDK5;MAPK1;RAF1;HRAS
Melanocyte development and pigmentation pathway	5/13	0.357268	0.645497	0	0	1.43229	1.47421	RPS6KA1;EP300;MAPK1;RAF1;HRAS
PI3K cascade	19/57	0.360661	0.645497	0	0	1.14601	1.16872	KLB;GSK3B;CDKN1A;GSK3A;PHLPP1;PDPK1;BAD;PTEN;FRS2;PTPN11;PIK3R1;MTOR;CASP9;FGF7;PIK3CA;AKT3;MLST8;MDM2;RICTOR
Activation of Src by protein tyrosine phosphatase alpha	4/10	0.360671	0.645497	0	0	1.52775	1.55798	CCNB1;PTPRA;CDK1;CDC25C
Activation of the AP-1 family of transcription factors	4/10	0.360671	0.645497	0	0	1.52775	1.55798	ATF2;MAPK9;JUN;MAPK1
Bile acid and bile salt biosynthesis via 24-hydroxycholesterol	4/10	0.360671	0.645497	0	0	1.52775	1.55798	CYP27A1;CYP39A1;AMACR;SLC27A2
Bile acids and bile salt biosynthesis	4/10	0.360671	0.645497	0	0	1.52775	1.55798	CYP27A1;CH25H;AMACR;SLC27A2
COPI-mediated vesicle transport	4/10	0.360671	0.645497	0	0	1.52775	1.55798	ARFGAP1;COPE;COPZ1;ARCN1
Calcitonin-like ligand receptors	4/10	0.360671	0.645497	0	0	1.52775	1.55798	RAMP2;CALCRL;RAMP3;RAMP1
DCC role in regulating apoptosis	4/10	0.360671	0.645497	0	0	1.52775	1.55798	CASP9;DCC;UNC5B;CASP3
Deregulation of CDK5 in Alzheimer's disease	4/10	0.360671	0.645497	0	0	1.52775	1.55798	APP;GSK3B;CDK5;CAPN1
Gap junction degradation	4/10	0.360671	0.645497	0	0	1.52775	1.55798	DAB2;GJA1;CLTC;MYO6
Glycoprotein 1b-IX-V activation signaling	4/10	0.360671	0.645497	0	0	1.52775	1.55798	VWF;FLNA;PIK3R1;RAF1
IKK complex recruitment by IRAK1	4/10	0.360671	0.645497	0	0	1.52775	1.55798	IKBKB;PELI2;PELI1;UBE2V1
Interferon-alpha signaling pathway	4/10	0.360671	0.645497	0	0	1.52775	1.55798	ST13;STAT1;STAT2;IRF9
NODAL signaling regulation	4/10	0.360671	0.645497	0	0	1.52775	1.55798	ACVR1C;ACVR2A;CER1;CFC1
Phospholipase C signaling pathway	4/10	0.360671	0.645497	0	0	1.52775	1.55798	PIK3CA;PDPK1;PIK3R1;PLCB1
Signaling events mediated by HDAC class II	13/38	0.360694	0.645497	0	0	1.19178	1.21529	RANBP2;UBE2I;NUP153;RFXANK;NR3C1;HDAC9;ESR1;NCOR2;TUBA1B;XPO1;TUBB2A;BCL6;GNB1
Acetylcholine biosynthesis	3/7	0.361671	0.645497	0	0	1.71868	1.74793	ACHE;PDHA1;PEMT
Attachment of GPI anchor to uPAR	3/7	0.361671	0.645497	0	0	1.71868	1.74793	PIGU;PGAP1;GPAA1
BAD activation and translocation to mitochondria	3/7	0.361671	0.645497	0	0	1.71868	1.74793	PPP3R1;BAD;BID
CREB phosphorylation	3/7	0.361671	0.645497	0	0	1.71868	1.74793	ATF1;MAPKAPK2;RPS6KA1
Cation-coupled chloride cotransporters	3/7	0.361671	0.645497	0	0	1.71868	1.74793	SLC12A2;SLC12A4;SLC12A7
Endothelial NOS activation	3/7	0.361671	0.645497	0	0	1.71868	1.74793	LYPLA1;ZDHHC21;CALM1
FYVE-finger proteins in vesicle transport	3/7	0.361671	0.645497	0	0	1.71868	1.74793	EEA1;HGS;RAB5A
Fas signaling pathway in cardiomyocytes	3/7	0.361671	0.645497	0	0	1.71868	1.74793	GSK3B;GSK3A;AKT3
Gamma-secretase-mediated ErbB4 signaling pathway	3/7	0.361671	0.645497	0	0	1.71868	1.74793	ADAM17;ERBB4;PSEN1
Integrin alpha-2b beta-3 signaling	3/7	0.361671	0.645497	0	0	1.71868	1.74793	PTPN1;TLN1;PTK2
MEK activation	3/7	0.361671	0.645497	0	0	1.71868	1.74793	KRAS;RAF1;HRAS
Nectin/Necl trans heterodimerization	3/7	0.361671	0.645497	0	0	1.71868	1.74793	CADM3;PVRL2;PVRL1
Negative regulation of the PI3K/Akt network	3/7	0.361671	0.645497	0	0	1.71868	1.74793	PHLPP1;AKT3;PTEN
NrCAM interactions	3/7	0.361671	0.645497	0	0	1.71868	1.74793	DLG1;NRP2;DLG4
Post-transcriptional silencing by small RNAs	3/7	0.361671	0.645497	0	0	1.71868	1.74793	AGO4;AGO2;TNRC6A
SLC26 family multifunctional anion exchangers	3/7	0.361671	0.645497	0	0	1.71868	1.74793	SLC26A1;SLC26A4;SLC26A6
Spermatogenesis regulation by CREM	3/7	0.361671	0.645497	0	0	1.71868	1.74793	XPO1;FSHB;CREM
Transport of nucleosides and free purine and pyrimidine bases across the plasma membrane	3/7	0.361671	0.645497	0	0	1.71868	1.74793	SLC29A1;SLC29A3;SLC28A3
Ubiquinone and other terpenoid-quinone biosynthesis	3/7	0.361671	0.645497	0	0	1.71868	1.74793	COQ2;COQ6;COQ5
Base excision repair	12/35	0.367182	0.652964	0	0	1.19574	1.19801	POLE4;SMUG1;POLD4;MBD4;FEN1;PARP3;PCNA;PARP4;APEX1;POLD2;XRCC1;POLE
Cytokines and inflammatory response	12/35	0.367182	0.652964	0	0	1.19574	1.19801	IL11;CSF3;TGFB2;CXCL8;TXLNA;CSF1;IFNG;IL7;IL13;IL9;TNF;IL17A
Interleukin-7 signaling pathway	12/35	0.367182	0.652964	0	0	1.19574	1.19801	GSK3B;CREBBP;CCND1;PIK3CA;BAD;STAT1;IL7;STAT3;EP300;MAPK1;PIK3R2;PIK3R1
Malaria	17/51	0.373125	0.661938	0	0	1.14596	1.12973	CD40;CSF3;TGFB2;CXCL8;GYPC;LRP1;CD81;SDC3;HBD;TNF;SELE;ICAM1;THBS3;CD40LG;IFNG;IL12A;MYD88
Type I interferon (interferon-alpha/beta) pathway	17/51	0.373125	0.661938	0	0	1.14596	1.12973	PTPN1;PTPRQ;STAT1;STAT2;PTPRO;PTPRM;PTPN11;PTPN12;PTPN14;PTPRF;PTP4A1;PTP4A2;PTPRB;PTPRA;PTPMT1;PTPN4;IRF9
Sphingolipid de novo biosynthesis	11/32	0.374043	0.662444	0	0	1.20046	1.18052	COL4A3BP;SGPL1;CERS5;SPTLC1;SPHK2;VAPB;PPAP2B;DEGS1;KDSR;CSNK1G2;CERS2
Adipocytokine signaling pathway	22/67	0.374756	0.662444	0	0	1.12053	1.09978	CPT1A;PRKAB2;PRKAA1;STAT3;PRKAG1;ACSL5;IRS2;PTPN11;ACSL3;TNFRSF1B;ADIPOR1;TNF;RELA;MTOR;TNFRSF1A;IKBKB;NFKBIA;POMC;MAPK9;STK11;NPY;AKT3
Telomerase regulation	22/67	0.374756	0.662444	0	0	1.12053	1.09978	JUN;SMAD3;HDAC1;TNKS;XRCC5;PTGES3;TINF2;TERF2;ESR1;MTOR;WRN;RAD50;CCND1;IFNG;RPS6KB1;WT1;POT1;MAPK1;ATM;RAD1;RBBP7;HNRNPC
Lipid digestion, mobilization, and transport	16/48	0.37981	0.670574	0	0	1.14593	1.10936	CETP;SCARB1;SAR1B;LCAT;APOA4;CEL;APOA5;PPP1CB;BMP1;FABP4;P4HB;A2M;LDLRAP1;LDLR;ABCG1;PNLIP
Homologous recombination	10/29	0.381338	0.670865	0	0	1.20618	1.16284	TOP3B;POLD4;RAD50;RAD51;RAD51C;RPA3;POLD2;RPA4;ATM;SSBP1
T cell receptor calcium pathway	10/29	0.381338	0.670865	0	0	1.20618	1.16284	PPP3CA;RCAN1;PPP3R1;JUN;CD40LG;IFNG;RCAN2;CHP1;NFATC2;CABIN1
Thyroid cancer	10/29	0.381338	0.670865	0	0	1.20618	1.16284	NTRK1;TCF7L2;TCF7L1;CCND1;TPR;MAPK1;BRAF;KRAS;PPARG;HRAS
FGF signaling pathway	20/61	0.387575	0.681024	0	0	1.118	1.05969	KLB;JUN;PDPK1;STAT1;CTNND1;CAMK2A;STAT3;FRS2;PTPN11;PIK3R1;PSEN1;CBL;DUSP6;CTTN;PIK3CA;BGLAP;RPS6KA1;SPP1;MAPK1;SOS1
Acyl chain remodelling of phosphatidylcholine	9/26	0.389146	0.682161	0	0	1.21325	1.14507	PLA2G16;PLA2G12A;PNPLA8;LPCAT4;LPCAT3;PLA2G2A;LPCAT2;MBOAT1;PLA2G4A
Inhibition of activated T cell apoptosis by neuropeptides VIP and PACAP	9/26	0.389146	0.682161	0	0	1.21325	1.14507	NFKBIA;PPP3CA;MAP3K1;PRKAR1A;PRKAR2A;GNAQ;NFATC2;CALM1;RELA
BMP receptor signaling	14/42	0.39428	0.690341	0	0	1.14588	1.06647	GSK3B;SMAD1;SMAD4;SMURF2;XIAP;SMAD6;BMP4;GREM1;PPM1A;BMP2;MAPK1;TAB2;MAP3K7;CER1
Nitrogen metabolism	8/23	0.397571	0.693635	0	0	1.22221	1.12734	CA1;GLUD2;CA2;CTH;CA4;ASNS;GLUL;CA13
RNA polymerase III transcription termination	8/23	0.397571	0.693635	0	0	1.22221	1.12734	NFIA;POLR3B;NFIB;POLR3F;POLR3H;POLR2H;POLR2K;POLR2L
Signaling by bone morphogenetic protein (BMP)	8/23	0.397571	0.693635	0	0	1.22221	1.12734	SMAD1;SMAD4;BMP2;SMURF2;SMAD6;FSTL1;ACVR2A;CER1
Iron uptake and transport	13/39	0.402169	0.700828	0	0	1.14586	1.04375	ATP6V1A;ATP6V0B;ATP6V1G1;ATP6V0E1;CYBRD1;TCIRG1;MCOLN1;FTH1;ATP6V0A4;ATP6V0E2;ATP6V1E1;ATP6V1C1;FTL
TSH regulation of gene expression	31/97	0.404923	0.70302	0	0	1.07651	0.97323	PHLDB1;FH;CXCL8;CSF1;ATP2A2;PIK3R1;HMGCR;PTPRF;ICAM1;PRDX2;FNTB;TP53BP2;PXDC1;HES1;CKB;LIMS3;JUN;GADD45B;LRRN3;TNK2;PDE2A;ARHGAP29;CYBA;CTTNBP2NL;VEGFA;VMP1;ID1;CLC;SLC26A4;PHLDB2;PPIC
Cell differentiation pathway	7/20	0.406761	0.70302	0	0	1.23394	1.10996	MEF2A;MEF2B;PAX7;ID2;MYOD1;STAT3;MEF2BNB-MEF2B
Dual incision reaction in GG-NER	7/20	0.406761	0.70302	0	0	1.23394	1.10996	ERCC1;RPA3;XPA;GTF2H2;GTF2H4;RAD23B;DDB2
GATA3-mediated activation of Th2 cytokine expression	7/20	0.406761	0.70302	0	0	1.23394	1.10996	MAP2K3;PRKAR1A;PRKAR2A;IL13;GNAS;NFATC2;MAP2K6
Golgi-associated vesicle biogenesis	7/20	0.406761	0.70302	0	0	1.23394	1.10996	HSPA8;BLOC1S1;DNAJC6;CLTC;AP1B1;DTNBP1;TXNDC5
Heparan sulfate/heparin glycosaminoglycan (HS-GAG) degradation	7/20	0.406761	0.70302	0	0	1.23394	1.10996	NAGLU;IDUA;SDC3;AGRN;GUSB;GPC6;SGSH
N-glycan antennae elongation in the medial/trans-Golgi	7/20	0.406761	0.70302	0	0	1.23394	1.10996	B4GALT3;ST6GAL1;B4GALT1;MAN2A2;MAN2A1;ST8SIA6;B4GALT5
Autoimmune thyroid disease	17/52	0.409109	0.705427	0	0	1.11314	0.994891	CD40;IFNA13;IFNA2;HLA-B;HLA-A;HLA-F;HLA-G;HLA-E;HLA-DMA;HLA-DMB;CD40LG;HLA-DPB1;CTLA4;TSHB;HLA-DPA1;HLA-DQB1;IFNA21
Vitamin B12 metabolism	17/52	0.409109	0.705427	0	0	1.11314	0.994891	SCARB1;SERPINA3;INSR;SERPINE1;MTHFR;SOD2;TNF;RELA;ICAM1;SOD1;IFNG;TCN2;CBS;CCL5;CTH;SAA1;LDLR
ABCA transporters in lipid homeostasis	6/17	0.416927	0.710605	0	0	1.24994	1.0935	ABCA2;ABCA6;ABCA3;ABCA9;ABCA7;ABCG1
Activation of BH3-only proteins	6/17	0.416927	0.710605	0	0	1.24994	1.0935	PPP3R1;BAD;BMF;DYNLL1;BID;DYNLL2
Beta-arrestin-dependent recruitment of Src kinases in GPCR signaling	6/17	0.416927	0.710605	0	0	1.24994	1.0935	FGR;GNAS;MAPK1;PLCB1;RAF1;HRAS
Cells and molecules involved in local acute inflammatory response	6/17	0.416927	0.710605	0	0	1.24994	1.0935	ITGB1;CXCL8;SELPLG;TNF;KNG1;ICAM1
Chylomicron-mediated lipid transport	6/17	0.416927	0.710605	0	0	1.24994	1.0935	SAR1B;APOA4;P4HB;LDLRAP1;APOA5;LDLR
Destabilization of mRNA by KSRP	6/17	0.416927	0.710605	0	0	1.24994	1.0935	EXOSC7;EXOSC5;EXOSC4;EXOSC9;DCP2;EXOSC1
Endocytotic role of NDK, phosphins and dynamin	6/17	0.416927	0.710605	0	0	1.24994	1.0935	PPP3CA;SYNJ2;CALM1;EPN1;NME1;PICALM
Glycosylphosphatidylinositol (GPI) biosynthesis	6/17	0.416927	0.710605	0	0	1.24994	1.0935	DPM2;PIGO;PIGP;PIGW;PIGV;PIGX
Platelet sensitization by LDL	6/17	0.416927	0.710605	0	0	1.24994	1.0935	FGR;PPP2R1B;PPP2R1A;PPP2R5E;PLA2G4A;PTPN11
Synaptic proteins at the synaptic junction	6/17	0.416927	0.710605	0	0	1.24994	1.0935	DLG1;EPB41;DLG4;GUK1;CASK;SPTBN1
Interleukin-4 signaling pathway	33/104	0.418585	0.712608	0	0	1.06523	0.927683	ATF2;IRS2;PIK3R2;PIK3R1;THY1;CBL;ETS1;RELA;IKBKB;HRH1;NFIL3;INPP5D;AKT3;EP300;MAPK1;IL13RA2;PDPK1;BAD;STAT1;STAT3;GTF3A;PTPN11;PARP14;MTOR;NFKBIA;CD40LG;BCL6;PIK3CA;RPS6KB1;FES;TFF3;BIRC5;SOS1
Propanoate metabolism	11/33	0.419614	0.713537	0	0	1.14581	0.995048	ALDH3A2;HADHA;ACSS2;ECHS1;PCCB;SUCLG1;ALDH7A1;ACAT2;LDHAL6A;ACAT1;ALDH9A1
Activation of Rac	5/14	0.4284	0.721257	0	0	1.27306	1.07917	PAK7;RAC1;SOS1;PAK2;NCK1
Adhesion and diapedesis of lymphocytes	5/14	0.4284	0.721257	0	0	1.27306	1.07917	ITGB1;CXCL8;ICAM2;CD34;ICAM1
Interferon gamma signaling regulation	5/14	0.4284	0.721257	0	0	1.27306	1.07917	PTPN1;IFNG;STAT1;IFNGR2;PTPN11
Porphyrin metabolism	5/14	0.4284	0.721257	0	0	1.27306	1.07917	FECH;UROD;HMBS;BLVRB;BLVRA
Signaling by NOTCH2	5/14	0.4284	0.721257	0	0	1.27306	1.07917	PSENEN;APH1A;JAG1;APH1B;PSEN1
T cell receptor/Ras pathway	5/14	0.4284	0.721257	0	0	1.27306	1.07917	MAPK1;BRAF;KRAS;RAF1;HRAS
TRAF3-dependent IRF activation pathway	5/14	0.4284	0.721257	0	0	1.27306	1.07917	CREBBP;MAVS;DDX58;EP300;TRIM25
Activation of the pre-replicative complex	10/30	0.429378	0.721257	0	0	1.14579	0.968669	CDC45;MCM7;PRIM1;RPA3;ORC2;RPA4;MCM3;MCM4;MCM5;POLE
Apoptosis intrinsic pathway	10/30	0.429378	0.721257	0	0	1.14579	0.968669	CASP9;PPP3R1;BAD;CASP3;XIAP;CYCS;BMF;BID;DYNLL1;DYNLL2
Asthma	10/30	0.429378	0.721257	0	0	1.14579	0.968669	CD40;HLA-DMA;HLA-DMB;CD40LG;IL13;IL9;HLA-DPB1;TNF;HLA-DPA1;HLA-DQB1
Myocyte adrenergic pathway	23/72	0.430141	0.721257	0	0	1.0757	0.907506	HCN4;ASAH1;ZMYND8;PLA2G4A;ADRB1;ARRB2;PIK3CB;ADRA1B;GNAI1;GNAI2;PPP3CA;MAPK9;PPP3R1;GRK5;GRK4;GNAQ;AKT3;DAG1;KRAS;RAC1;EPHB2;HRAS;ALDH7A1
Natural killer cell-mediated cytotoxicity	43/137	0.430822	0.721257	0	0	1.0484	0.882814	IFNA2;ARAF;ICAM2;PIK3R2;PIK3R1;PIK3CB;TNF;KIR2DL4;ICAM1;PPP3CA;PPP3R1;CASP3;TNFSF10;PLCG2;RAC2;CHP1;RAC3;MAPK1;RAC1;BID;HRAS;MICA;IFNA21;MICB;VAV3;IFNA13;IFNGR2;SH2D1A;HLA-B;TNFRSF10C;NFATC2;BRAF;PTPN11;HLA-A;HLA-G;HLA-E;IFNG;PIK3CA;KRAS;RAF1;SOS1;ULBP1;ULBP3
Integrin cell surface interactions	27/85	0.430995	0.721257	0	0	1.06684	0.897918	ITGB1;ITGAM;LAMA2;ICAM2;LAMC1;F11R;ICAM1;RAP1A;SPP1;ITGAV;PTPN1;VWF;PDPK1;ITGA2;ITGA1;FN1;LAMB1;PTK2;COL4A2;COL4A5;ITGA7;ITGA6;ITGA5;SOS1;TLN1;CRK;BCAR1
Myc active pathway	27/85	0.430995	0.721257	0	0	1.06684	0.897918	EIF4A1;ODC1;RPL11;TAF9;ENO1;BMI1;HSPD1;MTDH;PRDX3;CCNB1;CCND2;PEG10;UBTF;EP300;CREBBP;NPM1;SMAD4;SMAD3;TAF10;ACTL6A;HUWE1;NME1;CDK4;ID2;BIRC5;BCAT1;PTMA
PI3K class IB pathway in neutrophils	14/43	0.434359	0.724451	0	0	1.10629	0.92252	PRKCH;PTEN;PLD1;BMX;RHOA;FGR;PREX1;INPP5D;AKT3;RAC2;RAC3;KRAS;RAC1;HRAS
Regular glucocorticoid receptor pathway	26/82	0.438091	0.724451	0	0	1.064	0.878147	GSK3B;CDKN1A;CXCL8;HDAC1;NR3C1;RELA;ICAM1;MAPK9;BGLAP;EP300;MAPK1;YWHAH;SMARCC1;CREBBP;JUN;SMARCC2;MMP1;STAT1;IL13;SELE;PBX1;POMC;IFNG;CDK5;MDM2;SGK1
Attenuation of GPCR signaling	4/11	0.441738	0.724451	0	0	1.3094	1.06983	GRK4;PRKAR1A;PRKAR2A;GNAS
Bone mineralization regulation	4/11	0.441738	0.724451	0	0	1.3094	1.06983	ANKH;COL4A2;SPP1;COL4A5
Gamma-carboxylation, transport, and amino-terminal cleavage of proteins	4/11	0.441738	0.724451	0	0	1.3094	1.06983	VKORC1;PROC;GGCX;PROS1
Glypican-3 pathway	4/11	0.441738	0.724451	0	0	1.3094	1.06983	BMP4;MAPK9;FGF7;MDK
Integrin beta-4 pathway	4/11	0.441738	0.724451	0	0	1.3094	1.06983	LAMA2;ITGA6;LAMB1;LAMC1
Methylation	4/11	0.441738	0.724451	0	0	1.3094	1.06983	NNMT;MAT2A;COMT;HNMT
Monocyte and its surface molecules	4/11	0.441738	0.724451	0	0	1.3094	1.06983	ITGB1;ITGAM;SELE;ICAM1
Notch receptor processing	4/11	0.441738	0.724451	0	0	1.3094	1.06983	APH1A;PSENEN;APH1B;PSEN1
Osteopontin signaling	4/11	0.441738	0.724451	0	0	1.3094	1.06983	IKBKB;SPP1;MAPK1;RELA
Purine ribonucleoside monophosphate biosynthesis	4/11	0.441738	0.724451	0	0	1.3094	1.06983	ATIC;IMPDH2;ADSS;PFAS
Reversal of insulin resistance by leptin	4/11	0.441738	0.724451	0	0	1.3094	1.06983	CPT1A;PRKAA1;PRKAB2;PRKAG1
SUMOylation as a mechanism to modulate CtBP-dependent gene responses	4/11	0.441738	0.724451	0	0	1.3094	1.06983	UBE2I;ZEB1;UBA1;UBE2A
Serotonin transporter activity	4/11	0.441738	0.724451	0	0	1.3094	1.06983	TGFB1I1;STX1A;SCAMP2;SLC6A4
Sonic Hedgehog (SHH) receptor PTCH1 regulation of cell cycle	4/11	0.441738	0.724451	0	0	1.3094	1.06983	CCNB1;XPO1;CDK1;CDC25C
Stress fiber formation mediated by Rho-selective guanine exchange factor AKAP13	4/11	0.441738	0.724451	0	0	1.3094	1.06983	AKAP13;PRKAR2A;PRKAG1;RHOA
p38 gamma/delta MAPK pathway	4/11	0.441738	0.724451	0	0	1.3094	1.06983	MAP2K3;CCND1;STMN1;MAP2K6
Negative regulation of FGFR signaling	13/40	0.443877	0.727151	0	0	1.10334	0.896142	KLB;BRAF;FRS2;PTPN11;CBL;FGF7;UBB;PPP2R1A;MKNK1;UBC;MAPK1;RPS27A;UBA52
Fc epsilon receptor I signaling pathway	25/79	0.445453	0.728924	0	0	1.06094	0.857946	PIK3R2;PIK3CB;PIK3R1;TNF;MAPK9;INPP5D;AKT3;RAC2;PLCG2;RAC3;MAPK1;RAC1;MAP2K7;HRAS;MAP2K6;MAP2K3;VAV3;PLA2G12A;IL13;PLA2G2A;PLA2G4A;PIK3CA;KRAS;RAF1;SOS1
Endogenous Toll-like receptor signaling	8/24	0.451798	0.738487	0	0	1.14574	0.910314	IKBKB;BGN;LY96;IRAK4;TICAM1;RHOA;MYD88;HSPD1
Folate metabolism	20/63	0.453937	0.738818	0	0	1.06584	0.841799	SCARB1;SERPINA3;CSF1;INSR;SERPINE1;MTHFR;IZUMO1R;SOD2;TNF;RELA;ICAM1;SOD1;IFNG;MTHFD2;CBS;CTH;ST20-MTHFS;SAA1;LDLR;SLC19A1
Beta-oxidation of pristanoyl-CoA	3/8	0.458007	0.738818	0	0	1.37484	1.07357	AMACR;SCP2;HSD17B4
Chromatin remodeling by nuclear receptors to facilitate initiation of transcription in carcinoma cells	3/8	0.458007	0.738818	0	0	1.37484	1.07357	NCOR2;GTF2A1;RARA
Cytoskeletal remodeling regulation and cell spreading by IPP complex components	3/8	0.458007	0.738818	0	0	1.37484	1.07357	TESK1;PARVA;RSU1
Folate and pterine metabolism	3/8	0.458007	0.738818	0	0	1.37484	1.07357	FPGS;MTHFR;SLC19A1
Import of palmitoyl-CoA into the mitochondrial matrix	3/8	0.458007	0.738818	0	0	1.37484	1.07357	CPT1A;PRKAB2;SLC25A20
Lysine catabolism	3/8	0.458007	0.738818	0	0	1.37484	1.07357	OGDH;ALDH7A1;DLD
Proepithelin conversion to epithelin and wound repair control	3/8	0.458007	0.738818	0	0	1.37484	1.07357	CELA3B;GRN;CXCL8
RNA polymerase II C-terminal domain phosphorylation and interaction with capping enzyme	3/8	0.458007	0.738818	0	0	1.37484	1.07357	RNMT;GTF2H2;GTF2H4
Visceral fat deposits and the metabolic syndrome	3/8	0.458007	0.738818	0	0	1.37484	1.07357	PPARG;NR3C1;TNF
Vitamin C (ascorbate) metabolism	3/8	0.458007	0.738818	0	0	1.37484	1.07357	CYB5A;CYB5R3;GSTO1
Vitamin D biosynthesis	3/8	0.458007	0.738818	0	0	1.37484	1.07357	CYP27A1;PTH;GC
Natural killer cell receptor signaling pathway	19/60	0.462626	0.743485	0	0	1.06192	0.818569	MAP2K3;VAV3;MAP3K1;MAPK9;MAPK7;PIK3CA;INPP5D;AKT3;RAC2;PLCG2;RAC3;TSPO;MAPK1;KRAS;RAC1;RAF1;SOS1;HRAS;MAP2K6
ChREBP regulation by carbohydrates and cAMP	6/21	0.464979	0.743485	0	0	1.14572	0.877348	PRKAA1;PRKAB2;PRKAR1A;ACSM1;PRKAR2A;PRKAG1;GNAS
Cytosolic sensors of pathogen-associated DNA	6/21	0.464979	0.743485	0	0	1.14572	0.877348	IKBKB;NFKBIA;APP;SAA1;RIPK1;TICAM1;RELA
Mitochondrial tRNA aminoacylation	6/21	0.464979	0.743485	0	0	1.14572	0.877348	LARS2;QARS;GARS;YARS2;CARS2;FARS2;WARS2
Cysteine and methionine metabolism	11/34	0.465134	0.743485	0	0	1.09592	0.838847	MPST;SDS;MAT2A;GOT1;CBS;ADI1;CTH;GOT2;ENOPH1;LDHAL6A;SRM
Response to elevated platelet cytosolic calcium	26/83	0.467113	0.743485	0	0	1.04526	0.795632	APP;CD63;PROS1;SERPINE1;PDGFB;CLU;KNG1;FLNA;STX4;TIMP1;A2M;SRGN;TGFB2;VWF;FN1;ACTN4;TUBA4A;SOD1;VEGFA;F8;CD9;ALDOA;PFN1;TLN1;CALM1;PPIA
G-protein-mediated events	14/44	0.474352	0.743485	0	0	1.06934	0.797518	GNAZ;ADCY4;ITPR2;PLA2G4A;ADCY2;ITPR3;GNAI1;GNAI2;GNAT2;PRKAR1A;PRKAR2A;MAPK1;CALM1;PLCB1
Vasopressin-regulated water reabsorption	14/44	0.474352	0.743485	0	0	1.06934	0.797518	DCTN6;NSF;DYNC1H1;DYNLL1;DYNLL2;RAB11A;RAB11B;CREB3;DYNC1LI2;ARHGDIB;GNAS;STX4;RAB5A;DYNC1I1
Nuclear beta-catenin signaling and target gene transcription regulation	25/80	0.47505	0.743485	0	0	1.04158	0.775283	CXCL8;HDAC1;CHD8;CUL1;CCND2;XPO1;CCND1;IGF2BP1;EP300;COX2;SKP1;YWHAH;MYOG;TLE4;TCF7L2;TLE2;JUN;TCF7L1;TLE1;CDKN2A;BCL9;APC;TBL1XR1;ID2;TCF4
p53 signaling pathway	43/139	0.475706	0.743485	0	0	1.02641	0.762575	FOXA1;RB1;BTG2;CDKN1A;PCNA;SERPINE1;TAF9;TYRP1;PTEN;TGFA;RPS27L;NLRC4;CX3CL1;PYCARD;CCNB1;CASP6;TP53BP2;SPP1;EP300;SCN3B;BID;BCL2L14;MAP4K4;PLK3;CREBBP;JUN;GPX1;GADD45A;DUSP1;GDF15;NFYC;SH2D1A;TNFRSF10C;POU4F1;PML;DDB2;RGCC;TP53I3;BCL6;APC;JMY;MDM2;HSPA1B
Keratan sulfate/keratin metabolism	10/31	0.477157	0.743485	0	0	1.09115	0.807351	B4GALT3;CHST6;B4GALT1;B3GNT7;HEXB;HEXA;KERA;ST3GAL1;CHST2;B4GALT5
G alpha 13 pathway	21/67	0.478016	0.743485	0	0	1.0461	0.772135	ARHGEF11;ARHGEF10;ARHGEF12;PRKCH;MAP3K1;ROCK1;PDPK1;ROCK2;ARHGEF17;RDX;ARHGEF19;PIK3CB;PLD1;RHOA;PTK2;IKBKB;CDC42;NFKBIA;AKT3;ARHGEF3;MAP2K7
2-LTR circle formation	2/5	0.479699	0.743485	0	0	1.52757	1.12215	XRCC5;BANF1
AMPK inhibition of chREBP transcriptional activation activity	2/5	0.479699	0.743485	0	0	1.52757	1.12215	PRKAB2;STK11
ATM-mediated phosphorylation of repair proteins	2/5	0.479699	0.743485	0	0	1.52757	1.12215	H2AFX;ATM
Activation of RAS in B cells	2/5	0.479699	0.743485	0	0	1.52757	1.12215	KRAS;HRAS
Acyl chain remodeling of diacylglycerol and triacylglycerol	2/5	0.479699	0.743485	0	0	1.52757	1.12215	DGAT2;DGAT1
Blockade of neurotransmitter release by botulinum toxin	2/5	0.479699	0.743485	0	0	1.52757	1.12215	CHRNA1;STX1A
Cleavage of a damaged pyrimidine	2/5	0.479699	0.743485	0	0	1.52757	1.12215	SMUG1;MBD4
Cycling of Ran in nucleocytoplasmic transport	2/5	0.479699	0.743485	0	0	1.52757	1.12215	RANBP2;RANBP1
ERK activation	2/5	0.479699	0.743485	0	0	1.52757	1.12215	CDK1;MAPK1
Flap intermediate removal from the telomere lagging strand (C-strand)	2/5	0.479699	0.743485	0	0	1.52757	1.12215	FEN1;RPA3
Folate-alcohol and cancer pathway	2/5	0.479699	0.743485	0	0	1.52757	1.12215	CBS;MTHFR
G-protein signaling through tubby proteins	2/5	0.479699	0.743485	0	0	1.52757	1.12215	GNAQ;PLCB1
G2 phase pathway	2/5	0.479699	0.743485	0	0	1.52757	1.12215	CCNA2;CCNA1
Heme degradation	2/5	0.479699	0.743485	0	0	1.52757	1.12215	BLVRB;BLVRA
Histidine catabolism	2/5	0.479699	0.743485	0	0	1.52757	1.12215	HDC;FTCD
Insulin receptor substrate (IRS) activation	2/5	0.479699	0.743485	0	0	1.52757	1.12215	INSR;IRS2
N-glycan trimming and elongation in the cis-Golgi	2/5	0.479699	0.743485	0	0	1.52757	1.12215	MAN1A2;MGAT1
NOSTRIN-mediated endothelial NOS trafficking	2/5	0.479699	0.743485	0	0	1.52757	1.12215	NOSTRIN;WASL
Nifedipine activity	2/5	0.479699	0.743485	0	0	1.52757	1.12215	PCNA;MAPK1
Phospholipase C delta-1 interactions in phospholipid-associated cell signaling	2/5	0.479699	0.743485	0	0	1.52757	1.12215	ADRA1B;TGM2
Serotonin and melatonin biosynthesis	2/5	0.479699	0.743485	0	0	1.52757	1.12215	TPH1;AANAT
Thymic stromal lymphopoietin (TSLP) pathway	28/90	0.47999	0.743485	0	0	1.03485	0.759569	CD40;CXCL8;PSMD11;CSF1;PDCD6;CXCL3;CLDN1;PSMB10;ICAM1;PSMB4;PSMB2;PSMB1;CCL18;CD276;CCR1;JAG1;TNFSF14;IL13;PSMB8;NME1;PSMB9;PSMC5;PSMA4;PSMA1;PSMA2;IL3RA;PSME1;CD9
CDK regulation of DNA replication	6/18	0.480041	0.743485	0	0	1.14569	0.840804	MCM7;CCNE1;ORC2;MCM3;MCM4;MCM5
Downregulation of MTA-3 in ER-negative breast tumors	6/18	0.480041	0.743485	0	0	1.14569	0.840804	TUBA1A;HDAC1;HSPB1;ALDOA;ESR1;TUBA4A
Effect of METS on macrophage differentiation	6/18	0.480041	0.743485	0	0	1.14569	0.840804	NCOR2;JUN;CSF1;ETV3;ETS1;HRAS
Pre-NOTCH processing in Golgi	6/18	0.480041	0.743485	0	0	1.14569	0.840804	B4GALT1;MFNG;SEL1L;ATP2A3;ATP2A2;TMED2
Kit receptor signaling pathway	17/54	0.481384	0.744783	0	0	1.05281	0.769702	BAD;STAT1;RPS6;STAT3;PIK3R2;PTPN11;PIK3R1;CBL;RPS6KB1;INPP5D;RPS6KA1;EP300;MAPK1;RAF1;SOS1;HRAS;CRK
SLC-mediated transmembrane transport	77/251	0.483617	0.747455	0	0	1.01405	0.736671	NUP107;NUP188;SLC44A2;SLC4A2;SLC7A11;SLC6A2;SLC2A6;HK1;SLC2A8;SLC39A5;SLC39A8;SLC39A7;SLC12A7;SLC16A3;SLC39A1;SLC39A4;SLC30A6;SLC38A1;SLC6A18;SLC30A3;SLC35C1;SLC2A12;SLC39A10;SLC39A14;NUP93;SLC7A5;SLC7A9;SLCO4A1;NUP50;SLCO2A1;SLC27A6;NUP54;NUP98;SLC29A1;SLC29A3;SLC22A4;SLC24A1;NUP205;POM121;SEH1L;SLC26A1;SLC43A2;SLC43A1;SLC1A4;SLC3A2;SLC1A5;SLC5A3;SLC7A1;NUP160;SLC9A1;NUP85;TPR;NUP88;RAE1;SLC38A2…
Alpha-M beta-2 integrin signaling	13/41	0.485359	0.749362	0	0	1.06386	0.769029	ITGAM;SELPLG;YES1;LRP1;ROCK1;THY1;TNF;RHOA;ICAM1;FGR;MYH2;RAP1A;TLN1
Nef in HIV-1 replication and disease pathogenesis	9/28	0.490379	0.756322	0	0	1.08538	0.773418	AP1S2;AP1B1;AP1S1;RAC1;AP2B1;HLA-A;B2M;PAK2;AP1M1
BMAL1-CLOCK/NPAS2 activates circadian expression	12/38	0.497202	0.761295	0	0	1.05754	0.738967	MED1;CREBBP;CHD9;NCOA6;TBL1XR1;TGS1;NCOA3;SERPINE1;NAMPT;EP300;NR3C1;ARNTL2
BMP signaling pathway in stem cells	5/15	0.49773	0.761295	0	0	1.14567	0.79933	ACVR1;SMAD1;SMAD4;BMP1;ACVR2A
Calcium signaling by HBx of hepatitis B virus	5/15	0.49773	0.761295	0	0	1.14567	0.79933	JUN;CSNK2A1;RAF1;SOS1;HRAS
Coagulation intrinsic pathway	5/15	0.49773	0.761295	0	0	1.14567	0.79933	F8;VWF;C1QBP;A2M;KNG1
Glycosylation of mammalian N-linked oligosaccarides	5/15	0.49773	0.761295	0	0	1.14567	0.79933	FUT7;MAN2A2;MAN1A2;ST8SIA4;MAN2B1
Mechanisms of transcriptional repression by DNA methylation	5/15	0.49773	0.761295	0	0	1.14567	0.79933	HDAC1;MBD1;MBD2;CHD3;RBBP7
Mu-calpain pathway	5/15	0.49773	0.761295	0	0	1.14567	0.79933	ITGB1;CAPN1;RAC1;TLN1;RHOA
Sema3A/PAK-dependent axon repulsion	5/15	0.49773	0.761295	0	0	1.14567	0.79933	NRP1;HSP90AB1;FES;RAC1;PAK2
Melanoma	22/71	0.500808	0.764419	0	0	1.02876	0.71142	RB1;CDKN1A;BAD;CDKN2A;ARAF;PTEN;PDGFB;PIK3R2;BRAF;PIK3CB;PIK3R1;FGF7;CCND1;PIK3CA;CDK4;AKT3;MDM2;MAPK1;KRAS;RAF1;HRAS;FGF12
Mitochondrial pathway of apoptosis: multidomain Bcl-2 family	22/71	0.500808	0.764419	0	0	1.02876	0.71142	PRNP;ENDOG;PRKCH;HTRA2;ITPR2;ITPR3;PARK7;HSPA2;UBL5;CAPN8;STS;UBL3;UBB;CAPN7;UBD;UBC;VDAC2;CAPN1;PPIA;HSPA1B;UBL7;HSPA1A
G0 and early G1 pathway	8/25	0.505095	0.770165	0	0	1.07827	0.736466	TOP2A;CCNA2;CCNA1;PCNA;HDAC1;CCNE1;CDK1;MYBL2
Ether lipid metabolism	11/35	0.510029	0.775285	0	0	1.05018	0.707072	PLA2G12A;LPCAT4;PPAP2B;PLA2G2A;LPCAT2;EPT1;PLA2G4A;CEPT1;PLD1;PAFAH1B2;PAFAH1B1
Interleukin-2/PI3K pathway	11/35	0.510029	0.775285	0	0	1.05018	0.707072	UGCG;PIK3CA;RPS6KB1;RPS6;PTPN11;PIK3R1;RAC1;SOS1;RELA;MTOR;EIF3A
Prion diseases	11/35	0.510029	0.775285	0	0	1.05018	0.707072	C1QA;STIP1;PRNP;CCL5;MAPK1;LAMC1;NCAM2;C8A;SOD1;C1QC;HSPA1A
GnRH signaling pathway	31/101	0.5107	0.775507	0	0	1.0147	0.681854	CAMK2D;CAMK2A;ADCY4;ITPR2;ITPR3;ADCY2;PLD1;CDC42;MAPK9;MAPK7;MAPK1;MAP2K7;HRAS;CAMK2G;MAP2K6;MAP2K3;JUN;PLA2G12A;MAP3K1;FSHB;PLA2G2A;PLA2G4A;GNAQ;GNAS;KRAS;RAF1;CALM1;PLCB1;SOS1;ATF4;HBEGF
Phosphatidylinositol signaling system	24/78	0.513268	0.777125	0	0	1.01834	0.679188	DGKG;CDS1;DGKD;INPP1;DGKA;PTEN;ITPR2;PIK3C2G;ITPR3;PIK3R2;PIK3CB;PIK3R1;SYNJ2;PIK3CA;DGKQ;INPP5D;INPP5J;PLCG2;PIP4K2A;PIP5K1C;PLCB1;CDIPT;CALM1;DGKH
G alpha (z) signaling events	14/45	0.513871	0.777125	0	0	1.03477	0.688932	GNAZ;PRKCH;ADCY4;ADCY2;GNG11;GNAI1;GNAI2;GNG13;GNG10;GNG5;GNG7;GNB1;GNAS;GNB4
Interleukin-3 signaling pathway	14/45	0.513871	0.777125	0	0	1.03477	0.688932	JUN;CXCL8;BAD;STAT3;PTPN11;PIK3R1;CBL;INPP5D;IL3RA;MAPK1;ENPP3;RAF1;SOS1;HRAS
Signaling by FGFR mutants	14/45	0.513871	0.777125	0	0	1.03477	0.688932	CPSF6;STAT1;STAT3;FRS2;PIK3R1;FGF7;ZMYM2;CUX1;PIK3CA;FGFR1OP2;FGFR1OP;KRAS;SOS1;HRAS
Wnt signaling pathway and pluripotency	30/98	0.518626	0.779011	0	0	1.01083	0.663685	GSK3B;CTBP2;CTNND1;PPP2R2A;LRP6;MAPK9;CCND2;CCND1;PPP2R1B;RACGAP1;PPP2R4;PPP2R1A;PPP2R5E;EP300;MAP3K7;LDLR;TCF7L2;CREBBP;JUN;TCF7L1;PRKCH;WNT9B;FZD8;PPP2R3B;CSNK1E;ZBTB33;PPP2R3A;RHOA;APC;PAFAH1B1
BMP signaling and regulation	4/12	0.519341	0.779011	0	0	1.14564	0.750621	SMAD1;BMP2;SMAD4;SMAD6
Caspase-mediated cleavage of cytoskeletal proteins	4/12	0.519341	0.779011	0	0	1.14564	0.750621	GSN;CASP6;CASP3;VIM
Facilitative sodium-independent glucose transporters	4/12	0.519341	0.779011	0	0	1.14564	0.750621	SLC2A9;SLC2A12;SLC2A6;SLC2A8
Platelet endothelial cell adhesion molecule 1 (PECAM1) interactions	4/12	0.519341	0.779011	0	0	1.14564	0.750621	YES1;INPP5D;ITGAV;PTPN11
Resolution of AP sites via the single-nucleotide replacement pathway	4/12	0.519341	0.779011	0	0	1.14564	0.750621	SMUG1;MBD4;APEX1;XRCC1
Reversible hydration of carbon dioxide	4/12	0.519341	0.779011	0	0	1.14564	0.750621	CA1;CA2;CA4;CA13
Toll-like receptor endosomal trafficking and processing	4/12	0.519341	0.779011	0	0	1.14564	0.750621	CTSL;CTSS;HSP90B1;LGMN
Glycine, serine and threonine metabolism	10/32	0.524027	0.785243	0	0	1.04148	0.673014	SRR;SDS;CBS;PSAT1;GLYCTK;CTH;PHGDH;AGXT;ALDH7A1;DLD
Signaling events mediated by PTP1B	16/52	0.528209	0.790706	0	0	1.01831	0.649953	PTPN1;YES1;CSF1;INSR;STAT3;PDGFB;YBX1;PIK3R1;TXN;RHOA;FGR;FER;PIK3CA;CAPN1;CRK;BCAR1
Amoebiasis	32/105	0.528771	0.790745	0	0	1.00434	0.639966	CXCL8;ITGAM;LAMA2;COL11A1;LAMA4;HSPB1;PIK3R2;PIK3R1;LAMC1;PIK3CB;TNF;C8A;RELA;CASP3;IL12A;TGFB2;ARG2;SERPINB1;NOS2;LAMB4;FN1;SERPINB9;LAMB1;ACTN4;PTK2;COL4A2;IFNG;PIK3CA;GNAQ;GNAS;PLCB1;RAB5A
Platelet homeostasis	25/82	0.533606	0.797169	0	0	1.00489	0.631167	ATP2A3;ATP2A2;ITPR2;ITPR3;GNG10;PPP2R1B;GNG5;PPP2R1A;PPP2R5E;GNG7;GUCY1A3;GUCY1A2;NOS2;PDE2A;PLA2G4A;PTPN11;GNG11;GNG13;FGR;SLC8A3;GNB1;GNAS;GNB4;PDE3A;ORAI1
Adherens junction actin cytoskeletal organization	9/29	0.539448	0.799217	0	0	1.03104	0.636368	CADM3;JUP;CDH10;CTNND1;CTNNA1;CDH13;MLLT4;PVRL2;PVRL1
BARD1 signaling events	9/29	0.539448	0.799217	0	0	1.03104	0.636368	NPM1;RAD50;PCNA;RAD51;PRKDC;XRCC5;CCNE1;FANCD2;ATM
Histidine metabolism	9/29	0.539448	0.799217	0	0	1.03104	0.636368	ALDH3A2;ACY3;HDC;HNMT;LCMT1;ALDH7A1;CNDP1;FTCD;ALDH9A1
Inhibition of insulin secretion by adrenaline/noradrenaline	9/29	0.539448	0.799217	0	0	1.03104	0.636368	GNG10;GNG5;GNG7;GNB1;GNB4;GNG11;GNAI1;GNAI2;GNG13
Integrin beta-2 pathway	9/29	0.539448	0.799217	0	0	1.03104	0.636368	SPON2;ITGAM;CD40LG;PROC;ICAM2;THY1;F11R;KNG1;ICAM1
Interleukin-5 signaling pathway	15/49	0.540004	0.799217	0	0	1.01081	0.622837	GSK3B;GSK3A;JUN;STAT1;RPS6;STAT3;PIK3R2;PTPN11;PIK3R1;RPS6KB1;RPS6KA1;MAPK1;KRAS;RAF1;SOS1
Eicosanoid biosynthesis	6/19	0.54088	0.799217	0	0	1.05749	0.649886	PNPLA8;PTGES2;PLA2G2A;ALOX5AP;LTC4S;ALOX15B
GABA biosynthesis, release, reuptake and degradation	6/19	0.54088	0.799217	0	0	1.05749	0.649886	HSPA8;STXBP1;DNAJC5;GAD2;CPLX1;STX1A
Platelet calcium homeostasis	6/19	0.54088	0.799217	0	0	1.05749	0.649886	SLC8A3;ATP2A3;ATP2A2;ITPR2;ORAI1;ITPR3
Tob role in T-cell activation	6/19	0.54088	0.799217	0	0	1.05749	0.649886	TGFBR3;SMAD4;TGFB2;SMAD3;IFNG;CD3D
PPAR signaling pathway	21/69	0.541813	0.799217	0	0	1.00236	0.614282	CPT1A;MMP1;PDPK1;SCD5;ACSL5;DBI;ACSL3;SORBS1;APOA5;CYP27A1;FADS2;FABP4;SCP2;FABP5;ACOX1;SCD;UBC;SLC27A6;PPARG;ANGPTL4;SLC27A2
Abl role in Robo-Slit signaling	3/9	0.547431	0.799217	0	0	1.14562	0.690258	ABL2;CLASP1;CLASP2
Activation of pro-caspase 8	3/9	0.547431	0.799217	0	0	1.14562	0.690258	TNFSF10;RIPK1;FADD
Alpha-4 beta-7 integrin signaling	3/9	0.547431	0.799217	0	0	1.14562	0.690258	ITGB1;PTK2;RHOA
Axonogenesis regulation by p75 neurotrophin receptor	3/9	0.547431	0.799217	0	0	1.14562	0.690258	LINGO1;RHOA;RTN4
Elevation of cytosolic calcium levels	3/9	0.547431	0.799217	0	0	1.14562	0.690258	ITPR2;ORAI1;ITPR3
Heme biosynthesis	3/9	0.547431	0.799217	0	0	1.14562	0.690258	FECH;UROD;HMBS
Inhibition of matrix metalloproteinases	3/9	0.547431	0.799217	0	0	1.14562	0.690258	TIMP2;TIMP1;HRAS
MAP kinase pathway regulation through dual specificity phosphatases	3/9	0.547431	0.799217	0	0	1.14562	0.690258	DUSP4;DUSP1;DUSP6
Phenylalanine and tyrosine catabolism	3/9	0.547431	0.799217	0	0	1.14562	0.690258	QDPR;PAH;PCBD1
Rapid glucocorticoid receptor pathway	3/9	0.547431	0.799217	0	0	1.14562	0.690258	MAPK9;GNB1;GNAS
Sodium/calcium exchangers	3/9	0.547431	0.799217	0	0	1.14562	0.690258	SLC8A3;SLC24A1;SLC8B1
Type I hemidesmosome assembly	3/9	0.547431	0.799217	0	0	1.14562	0.690258	CD151;DST;ITGA6
Thromboxane A2 receptor signaling	17/56	0.552137	0.805111	0	0	0.99868	0.593175	PRKCH;YES1;ROCK1;ARRB2;SELE;RHOA;RAB11A;ICAM1;GNAI2;FGR;GNA13;SLC9A3R1;GNAQ;GNB1;RAC1;PTGDR;TGM2
Alpha-6 beta-1 and alpha-6 beta-4 integrin signaling	14/46	0.552559	0.805111	0	0	1.00236	0.594595	ITGB1;LAMA2;LAMA4;LAMB1;LAMC1;PIK3R1;PIK3CA;RPS6KB1;PMP22;CD9;ITGA6;RAC1;HRAS;YWHAH
GM-CSF-mediated signaling events	11/36	0.553785	0.805472	0	0	1.0081	0.595765	IKBKB;PIK3CA;STAT1;STAT3;MAPK1;PTPN11;KRAS;PIK3R1;RAF1;SOS1;HRAS
Vascular smooth muscle contraction	35/116	0.554949	0.805472	0	0	0.989922	0.582944	MYLK2;RAMP2;CALCRL;RAMP3;ROCK1;ROCK2;ARAF;ADCY4;ITPR2;ITPR3;MYL6B;ADCY2;ADRA1B;ACTG2;PPP1CB;GNA13;MAPK1;GUCY1A3;ARHGEF11;GUCY1A2;PLA2G12A;PRKCH;ARHGEF12;PPP1R12A;PLA2G2A;PLA2G4A;BRAF;RHOA;MYL6;GNAQ;GNAS;RAF1;CALM1;PLCB1;RAMP1
Galactose metabolism	8/26	0.556627	0.805472	0	0	1.01829	0.596575	B4GALT1;UGP2;AKR1B1;LCT;GLA;GALK2;HK1;GALK1
Integrin family cell surface interactions	8/26	0.556627	0.805472	0	0	1.01829	0.596575	ITGB1;ITGAM;ITGA2;ITGA1;ITGA7;ITGAV;ITGA6;ITGA5
Interleukin-27-mediated signaling events	8/26	0.556627	0.805472	0	0	1.01829	0.596575	IFNG;STAT1;STAT2;STAT3;IL12A;IL6ST;TNF;IL17A
RXR/VDR pathway	8/26	0.556627	0.805472	0	0	1.01829	0.596575	NCOR2;MED1;SREBF1;RPS6KB1;NR1H2;RARA;PPARG;TNF
YAP1- and WWTR1 (TAZ)-stimulated gene expression	8/26	0.556627	0.805472	0	0	1.01829	0.596575	MED1;WWTR1;CREBBP;CHD9;NCOA6;TBL1XR1;TGS1;NCOA3
CRMPs in Sema3A signaling	5/16	0.563546	0.813838	0	0	1.04144	0.597273	GSK3B;NRP1;CDK5;FES;CRMP1
Adipogenesis	40/133	0.563757	0.813838	0	0	0.985322	0.56472	RB1;FOXC2;CDKN1A;SERPINE1;CISD1;IRS2;NR3C1;TNF;HIF1A;MEF2BNB-MEF2B;NAMPT;LMNA;NRIP1;MEF2A;WWTR1;SREBF1;MBNL1;MEF2B;SMAD3;GADD45B;GADD45A;STAT1;STAT2;STAT3;GTF3A;LIFR;MIF;BSCL2;BMP4;NCOR2;BMP2;BMP1;SCD;RARA;ID3;PLIN2;PPARG;IL6ST;LPIN1;LPIN2
Androgen receptor regulation of biosynthesis and transcription	16/53	0.564062	0.813838	0	0	0.99072	0.567277	GSK3B;SMARCC1;CREBBP;JUN;HDAC1;NR3C1;NR2C2;SIRT1;GNB2L1;APPBP2;ZMIZ2;MDM2;REL;EP300;KAT7;MAP2K6
Growth hormone receptor signaling	13/43	0.56598	0.815807	0	0	0.992794	0.565094	PTPN1;STAT1;INSR;STAT3;IRS2;PIK3R1;ADAM17;PIK3CA;RPS6KA1;MAPK1;RAF1;SOS1;HRAS
Interleukin-11 pathway	7/23	0.576037	0.828146	0	0	1.00236	0.552884	JUN;BGLAP;ITGA2;BIRC5;TIMP1;DUSP6;ICAM1
Aquaporin-mediated transport	15/50	0.576689	0.828146	0	0	0.981854	0.540464	ADCY4;ADCY2;GNG11;RAB11A;AQP1;GNG13;GNG10;GNG5;PRKAR1A;GNG7;PRKAR2A;GNB1;GNAS;GNB4;RAB11FIP2
Mitochondrial pathway of apoptosis: BH3-only Bcl-2 family	29/97	0.579829	0.828146	0	0	0.976976	0.532473	HIF1A;CTSS;PPP3CA;MAPK9;CAPN8;PPP3R1;CTSO;CAPN7;C1QBP;AKT3;CTSH;BMF;CAPN1;BID;CTSC;CTSA;MOAP1;JUN;PRKCH;CSNK2A1;SPHK2;BAD;CSNK2A2;DYNLL1;CSNK2B;VDAC3;CDK1;VDAC2;VDAC1
Activation of matrix metalloproteinases	9/30	0.58662	0.828146	0	0	0.981872	0.523709	PRSS1;MMP13;CMA1;MMP1;MMP15;CTRB2;TIMP2;TIMP1;MMP10
Glutamate binding and activation of AMPA receptors and synaptic plasticity	9/30	0.58662	0.828146	0	0	0.981872	0.523709	NSF;CAMK2D;DLG1;DLG4;CAMK2A;MYO6;MDM2;AP2B1;CAMK2G
Inflammatory response pathway	9/30	0.58662	0.828146	0	0	0.981872	0.523709	CD40;CD40LG;IFNG;FN1;LAMB1;LAMC1;TNFRSF1B;THBS3;TNFRSF1A
MicroRNAs in muscle cell differentiation	9/30	0.58662	0.828146	0	0	0.981872	0.523709	MEF2A;MEF2B;PRKCH;PAX7;PRKAR1A;PRKAR2A;ID2;MYOD1;MEF2BNB-MEF2B
Retinoic acid receptor-mediated signaling	9/30	0.58662	0.828146	0	0	0.981872	0.523709	NCOR2;CREBBP;HDAC1;NCOA3;NRIP1;CDK1;RARA;EP300;MAPK1
Signaling by FGFR1 mutants	9/30	0.58662	0.828146	0	0	0.981872	0.523709	ZMYM2;CPSF6;CUX1;PIK3CA;STAT1;FGFR1OP2;STAT3;FGFR1OP;PIK3R1
Signaling pathway from G-protein families	9/30	0.58662	0.828146	0	0	0.981872	0.523709	PPP3CA;JUN;PRKAR1A;PRKAR2A;GNAQ;NFATC2;CALM1;RAF1;HRAS
Tight junction interactions	9/30	0.58662	0.828146	0	0	0.981872	0.523709	CLDN11;CLDN10;CLDN5;PARD3;CLDN23;CLDN12;CLDN18;F11R;CLDN1
ADP signalling through P2Y purinoceptor 1	2/6	0.588133	0.828146	0	0	1.1456	0.608085	GNB1;PLA2G4A
Basic mechanisms of SUMOylation	2/6	0.588133	0.828146	0	0	1.1456	0.608085	UBE2I;SUMO3
Beta-oxidation of very long chain fatty acids	2/6	0.588133	0.828146	0	0	1.1456	0.608085	ACOX1;HSD17B4
DNA replication initiation	2/6	0.588133	0.828146	0	0	1.1456	0.608085	PRIM1;POLE
MSP/RON receptor signaling pathway	2/6	0.588133	0.828146	0	0	1.1456	0.608085	CSF1;TNF
NADE-dependent death signaling	2/6	0.588133	0.828146	0	0	1.1456	0.608085	NGFRAP1;CASP3
Neurotransmitter clearance in the synaptic cleft	2/6	0.588133	0.828146	0	0	1.1456	0.608085	ACHE;COMT
Proteolysis and signaling pathway of Notch	2/6	0.588133	0.828146	0	0	1.1456	0.608085	ADAM17;PSEN1
Signaling by EGFR	2/6	0.588133	0.828146	0	0	1.1456	0.608085	LRIG1;SOS1
Small interfering RNA (siRNA) biogenesis	2/6	0.588133	0.828146	0	0	1.1456	0.608085	AGO4;AGO2
Small leucine-rich proteoglycan (SLRP) molecules	2/6	0.588133	0.828146	0	0	1.1456	0.608085	BGN;KERA
Vitamin B6 metabolism	2/6	0.588133	0.828146	0	0	1.1456	0.608085	PSAT1;PDXP
ABC transporters	14/47	0.590102	0.828146	0	0	0.971916	0.512646	ABCD4;ABCA2;ABCC1;ABCB1;ABCB6;ABCB7;ABCA6;ABCA3;ABCA9;TAP2;ABCA7;ABCA8;ABCB11;ABCG1
Delta Np63 pathway	14/47	0.590102	0.828146	0	0	0.971916	0.512646	TOP2A;GSK3B;TCF7L1;CDKN2A;FBXW7;ADRM1;WWP1;GNB2L1;CCNB2;ITCH;MDM2;HES1;ATM;ADA
Adenylate cyclase inhibitory pathway	4/13	0.591373	0.828146	0	0	1.01828	0.53491	ADCY4;ADCY2;GNAI1;GNAI2
CTL mediated immune response against target cells	4/13	0.591373	0.828146	0	0	1.01828	0.53491	HLA-A;CD3D;B2M;ICAM1
Chondroitin sulfate/dermatan sulfate degradation	4/13	0.591373	0.828146	0	0	1.01828	0.53491	IDUA;HEXB;HEXA;BGN
Irinotecan pathway	4/13	0.591373	0.828146	0	0	1.01828	0.53491	BCHE;ABCC1;APC;CYP3A5
Signal attenuation	4/13	0.591373	0.828146	0	0	1.01828	0.53491	INSR;IRS2;SOS1;CRK
Interleukin-23-mediated signaling events	11/37	0.595961	0.833781	0	0	0.969255	0.501667	NFKBIA;NOS2;IFNG;PIK3CA;STAT1;IL23R;STAT3;PIK3R1;TNF;RELA;IL17A
Pancreatic secretion	30/101	0.59655	0.833814	0	0	0.967911	0.500016	PRSS1;CELA3B;RAB3D;ATP2A3;ADCY4;ITPR2;ATP2A2;ITPR3;ADCY2;SLC4A2;SLC9A1;RAP1A;CA2;CD38;RAC1;RAB8A;CPA3;SLC12A2;PLA2G12A;PLA2G2A;PLA2G4A;CEL;ATP1B1;RHOA;RAB11A;TPCN2;GNAQ;GNAS;PLCB1;PNLIP
Phase II of biological oxidations: conjugation	21/71	0.603131	0.842215	0	0	0.96213	0.486473	UGT2B10;GSTM4;GGT7;NNMT;GSTM1;GSTO1;ACSM1;GSTP1;MGST3;GSS;MGST1;MGST2;COMT;CNDP2;PAPSS1;UGP2;MAT2A;GSTA4;NAT1;UGT2B7;SULT1C4
Bile acid and bile salt metabolism	8/27	0.605719	0.844231	0	0	0.964626	0.483605	CYP27A1;CYP39A1;CH25H;AMACR;SCP2;HSD17B4;ABCB11;SLC27A2
FSH signaling pathway	8/27	0.605719	0.844231	0	0	0.964626	0.483605	RPS6KB1;RHEB;FSHB;RPS6;MAPK1;RAF1;SGK1;MTOR
Nuclear receptor transcription pathway	15/51	0.612158	0.850996	0	0	0.954512	0.46844	ESRRA;MED1;NR1H2;NR1I2;NR1D2;NR3C1;NR2C2;ESR1;NRBP1;NR3C2;RARA;PGR;PPARG;NRBF2;NR2C2AP
Fibroblast growth factor receptor pathway	31/105	0.612512	0.850996	0	0	0.959578	0.470372	CBLB;PIK3R2;PIK3R1;CBL;RPS6KA4;CYTH3;MAPK9;FGF7;MAPK7;AKT3;RPS6KA1;PLCG2;MAPK1;MAP2K7;HRAS;MAP2K6;MAP2K3;PRKCH;PDPK1;BAD;CDKN2A;SPRY4;FRS2;PTPN11;PIK3CA;RPS6KB1;KRAS;SPRY1;RAF1;SOS1;FGF12
EPO receptor signaling	10/34	0.612879	0.850996	0	0	0.954549	0.467336	JUN;CSNK2A1;STAT1;RASA1;STAT3;MAPK1;IRS2;RAF1;SOS1;HRAS
Ephrin receptor A forward pathway	10/34	0.612879	0.850996	0	0	0.954549	0.467336	VAV3;FGR;EPHA6;YES1;ROCK1;CDK5;CBL;EFNA5;CRK;RHOA
Jak-STAT signaling pathway	59/199	0.61615	0.854734	0	0	0.965196	0.467411	CSF3;CSF3R;CXCL8;PTPRQ;IL23R;IFNA2;PTPRO;PTPRM;CBLB;PIK3CB;PTPRF;SPRED2;CCND2;CCND1;AKT3;EP300;IL12A;IL13RA2;IL6R;PIAS4;IL11;IFNA13;IFNGR2;IL13;LIFR;OSMR;PTP4A1;PTP4A2;IFNG;PIK3CA;IFNE;IL3RA;IL6ST;SOS1;IRF9;PIK3R2;PIK3R1;CBL;IL22RA2;PTPMT1;SOCS7;IFNA21;PTPN1;CREBBP;TSLP;STAT1;STAT2;STAT3;SPRY4;PTPN11;PTPN12;PTPN14;PTPRB;IL7;PTPRA;IL9;SPRY1;PTPN4;CRLF2
Arachidonic acid metabolism	17/58	0.619359	0.855958	0	0	0.949827	0.455034	CBR1;PLA2G12A;GGT7;GPX1;GPX4;GPX3;PTGES2;GPX5;PLA2G2A;AKR1C3;GPX7;PLA2G4A;CYP2C19;LTC4S;ALOX15B;CYP2C9;CBR3
Graft-versus-host disease	12/41	0.619719	0.855958	0	0	0.947938	0.453577	HLA-DMA;HLA-DMB;IFNG;HLA-B;HLA-DPB1;HLA-A;HLA-F;TNF;HLA-G;HLA-DPA1;HLA-E;HLA-DQB1
Arrhythmogenic right ventricular cardiomyopathy (ARVC)	22/75	0.621353	0.855958	0	0	0.950844	0.452465	ITGB1;TCF7L2;TCF7L1;LAMA2;JUP;ITGA2;ITGA1;ATP2A2;ACTN4;ACTB;ACTG1;GJA1;LMNA;DAG1;PKP2;CTNNA1;ITGA7;ITGAV;DSG2;ITGA6;ITGA5;CACNG1
ACE inhibitor pathway	5/17	0.624638	0.855958	0	0	0.954587	0.449212	CMA1;CYP11B2;ATP6AP2;KNG1;NR3C2
Beta-catenin phosphorylation cascade	5/17	0.624638	0.855958	0	0	0.954587	0.449212	GSK3B;APC;PPP2R1B;PPP2R1A;PPP2R5E
Estrogen metabolism	5/17	0.624638	0.855958	0	0	0.954587	0.449212	NQO1;GSTM1;STS;COMT;UGT2B7
Osteoclast signaling	5/17	0.624638	0.855958	0	0	0.954587	0.449212	AIMP2;ATP6V1G1;PDGFB;SPP1;SLC9A1
Phenylalanine metabolism	5/17	0.624638	0.855958	0	0	0.954587	0.449212	GOT1;PAH;GOT2;MIF;PRDX6
TAK1-mediated activation of p38 MAPK	5/17	0.624638	0.855958	0	0	0.954587	0.449212	MAP2K3;MAPKAPK2;TAB2;MAP3K7;MAP2K6
Unblocking of NMDA receptor, glutamate binding and activation	5/17	0.624638	0.855958	0	0	0.954587	0.449212	CAMK2D;DLG4;CAMK2A;AKAP9;CAMK2G
Interleukin-12-mediated signaling events	19/65	0.626103	0.855958	0	0	0.946155	0.443028	MAP2K3;ATF2;GADD45B;NOS2;SPHK2;STAT1;STAT3;HLA-A;CD3D;RELA;MTOR;RELB;GADD45G;PPP3CA;PPP3R1;IFNG;IL12A;B2M;MAP2K6
TAK1 activates NF-kappaB by phosphorylation and activation of IKK complex	7/24	0.627194	0.855958	0	0	0.943328	0.440062	IKBKB;NFKBIA;APP;SAA1;TAB2;MAP3K7;RELA
Triacylglyceride biosynthesis	4/24	0.627194	0.855958	0	0	0.943328	0.440062	GNPAT;DGAT2;DGAT1;MOGAT3;PPAP2B;AGPAT3;AGPAT4
E2F-enabled inhibition of pre-replication complex formation	3/10	0.627471	0.855958	0	0	0.98189	0.457618	CCNB1;ORC2;CDK1
PIP biosynthesis at the late endosome membrane	3/10	0.627471	0.855958	0	0	0.98189	0.457618	FIG4;MTMR2;MTMR4
Purine catabolism	3/10	0.627471	0.855958	0	0	0.98189	0.457618	NT5E;GPX1;PNP
Reduction of cytosolic calcium levels	3/10	0.627471	0.855958	0	0	0.98189	0.457618	SLC8A3;ATP2A3;ATP2A2
TRAF6-mediated IRF7 activation in TLR7/8 or 9 signaling	3/10	0.627471	0.855958	0	0	0.98189	0.457618	IRAK4;UBE2V1;MYD88
Gluconeogenesis	9/31	0.6314	0.85973	0	0	0.937174	0.430927	GPI;GOT1;MDH1;MDH2;GOT2;PGK1;ENO1;ALDOA;SLC25A11
One-carbon metabolism	9/31	0.6314	0.85973	0	0	0.937174	0.430927	ATIC;TCN2;MTHFD2;FOLH1B;ST20-MTHFS;MTHFR;TYMS;ALDH1L2;FTCD
T cell activation co-stimulatory signal	6/21	0.651712	0.883505	0	0	0.916356	0.39234	PIK3CA;CTLA4;PTPN11;PIK3R1;CD3D;ICOSLG
Interleukin receptor SHC signaling	8/28	0.651855	0.883505	0	0	0.916329	0.392128	PIK3CA;INPP5D;IL3RA;PIK3R2;PIK3CB;PIK3R1;SOS1;HRAS
PTM: gamma carboxylation, hypusine formation and arylsulfatase activation	8/28	0.651855	0.883505	0	0	0.916329	0.392128	EIF5A;VKORC1;STS;PROC;GGCX;PROS1;SUMF2;SUMF1
Phosphatidic acid biosynthesis	8/28	0.651855	0.883505	0	0	0.916329	0.392128	GNPAT;PLA2G12A;LPCAT4;PLA2G2A;PLA2G4A;PLD1;AGPAT3;AGPAT4
Recycling pathway of cell adhesion molecule L1	8/28	0.651855	0.883505	0	0	0.916329	0.392128	RPS6KA4;CLTC;RPS6KA1;RDX;NUMB;MAPK1;MSN;AP2B1
Glycogen breakdown (glycogenolysis)	4/14	0.656562	0.885009	0	0	0.916384	0.385558	PHKG2;PHKB;CALM1;GYG1
HIV-1 early elongation complex formation	4/14	0.656562	0.885009	0	0	0.916384	0.385558	SUPT4H1;GTF2H2;GTF2H4;NELFE
Intronless pre-mRNA processing	4/14	0.656562	0.885009	0	0	0.916384	0.385558	NUDT21;CPSF1;PABPN1;CLP1
Non-homologous end-joining (NHEJ) pathway	4/14	0.656562	0.885009	0	0	0.916384	0.385558	FEN1;RAD50;PRKDC;XRCC5
Platelet amyloid precursor protein pathway	4/14	0.656562	0.885009	0	0	0.916384	0.385558	APP;COL4A2;SERPINE1;COL4A5
T cell receptor/JNK pathway	4/14	0.656562	0.885009	0	0	0.916384	0.385558	JUN;MAP3K1;CRK;MAP3K7
Cytosolic DNA-sensing pathway	16/56	0.664545	0.894954	0	0	0.916218	0.374415	IFNA13;DDX58;IFNA2;ADAR;TMEM173;RELA;IKBKB;PYCARD;NFKBIA;MAVS;POLR3B;CCL5;POLR3F;RIPK1;POLR3H;IFNA21
Myometrial relaxation and contraction pathways	45/155	0.67222	0.900888	0	0	0.936799	0.372068	ATF1;ATF2;MYLK2;CAMK2D;RAMP2;RAMP3;CAMK2A;ATP2A3;ADCY4;ITPR2;ATP2A2;ITPR3;ADCY2;ARRB2;ACTB;ACTG1;RGS5;GJA1;GRK5;GNG5;GRK4;PRKAR2A;GNG7;PLCG2;CAMK2G;GABPA;YWHAH;GUCY1A3;JUN;PRKCH;IGFBP4;GSTO1;GNG11;GNG13;CREB3;PRKAR1A;MYL2;GNAQ;PKIA;GNB1;GNAS;GNB4;CALM1;RAMP1;ATF4
Prothrombin activation intrinsic pathway	9/32	0.673416	0.900888	0	0	0.896363	0.354415	F8;PROC;VWF;COL4A2;PROS1;C1QBP;COL4A5;A2M;KNG1
Interferon alpha signaling regulation	7/25	0.674677	0.900888	0	0	0.890857	0.350571	PTPN1;STAT1;STAT2;IFNA2;PTPN11;USP18;IFNA21
RNA polymerase I transcription initiation	7/25	0.674677	0.900888	0	0	0.890857	0.350571	RRN3;UBTF;POLR2H;GTF2H2;PTRF;GTF2H4;POLR2K
Syndecan 1 pathway	13/46	0.676096	0.900888	0	0	0.902345	0.353195	COL13A1;MMP1;COL11A1;COL12A1;CASK;CCL5;COL6A2;COL7A1;COL6A1;COL10A1;MAPK1;COL4A5;PPIB
Anandamide metabolism	2/7	0.678718	0.900888	0	0	0.916412	0.355155	CNR2;PLD1
Creatine metabolism	2/7	0.678718	0.900888	0	0	0.916412	0.355155	SLC6A8;CKB
Cyanoamino acid metabolism	2/7	0.678718	0.900888	0	0	0.916412	0.355155	GGT7;GBA3
Homologous DNA pairing and strand exchange	2/7	0.678718	0.900888	0	0	0.916412	0.355155	RAD51;RPA3
Inactivation of BCL-2 by BH3-only proteins	2/7	0.678718	0.900888	0	0	0.916412	0.355155	BAD;BID
PP2A-mediated dephosphorylation of key metabolic factors	2/7	0.678718	0.900888	0	0	0.916412	0.355155	PPP2R1B;PPP2R1A
Phase I of biological oxidations: non-cytochrome P450 enzymes	2/7	0.678718	0.900888	0	0	0.916412	0.355155	PON2;LIPA
Telomerase RNA component gene hTERC transcriptional regulation	2/7	0.678718	0.900888	0	0	0.916412	0.355155	RB1;NFYC
Vitamin A uptake in enterocytes	2/7	0.678718	0.900888	0	0	0.916412	0.355155	RDH11;PNLIP
Vitamin D (calciferol) metabolism	2/7	0.678718	0.900888	0	0	0.916412	0.355155	GC;LGMN
Zinc efflux and compartmentalization by the SLC30 family	2/7	0.678718	0.900888	0	0	0.916412	0.355155	SLC30A6;SLC30A3
Bone remodeling	5/18	0.680252	0.901303	0	0	0.881094	0.339478	IKBKB;NFKBIA;EIF2AK2;RELA;IRF9
PKA activation in glucagon signaling	5/18	0.680252	0.901303	0	0	0.881094	0.339478	PRKAR1A;PRKAR2A;ADCY4;GNAS;ADCY2
Integration of energy metabolism	36/125	0.682272	0.903169	0	0	0.9263	0.354149	STXBP1;ADCY4;ITPR2;ITPR3;ADCY2;IQGAP1;GNAI1;GNAI2;STK11;GNG10;RAP1A;PPP2R1B;GNG5;PPP2R1A;PRKAR2A;GNG7;SEC11A;TCF7L2;PRKAB2;KCNB1;TALDO1;GNG11;GNG13;SPCS3;SPCS1;PRKAR1A;GNAQ;GNB1;GNAS;GNB4;PLCB1;SLC25A5;TKT;SLC25A4;STX1A;SLC25A6
cAMP cell motility pathway inferred from amoeba model	19/67	0.684601	0.904174	0	0	0.906601	0.343529	CYFIP2;VASP;GCA;DGKA;PDE4C;PDE2A;PTEN;BRK1;ITPR2;ITPR3;ACTB;ACTG2;ACTG1;HLA-E;RPS4X;PLCG2;PDE3A;PDE7B;PLCB1
E2F transcription factor network	21/74	0.687833	0.904174	0	0	0.907474	0.339585	RB1;RANBP1;CDKN1A;CREBBP;CBX5;RRM2;HDAC1;CDKN2A;SERPINE1;XRCC1;TYMS;SIRT1;UXT;CCNA2;RYBP;CCNE1;MCM3;CDK1;EP300;MYBL2;ATM
Gastric acid secretion	21/74	0.687833	0.904174	0	0	0.907474	0.339585	MYLK2;CAMK2D;CAMK2A;ADCY4;ITPR2;ADCY2;ITPR3;SLC4A2;ATP1B1;ACTB;GNAI1;GNAI2;SLC9A1;CA2;HRH2;GNAQ;GNAS;GAST;PLCB1;CALM1;CAMK2G
Transmembrane transport of small molecules	127/432	0.69101	0.904174	0	0	0.953016	0.352236	NUP107;ATP8A1;NUP188;SLC4A2;ATP12A;AQP1;FTH1;SLC39A5;SLC39A8;SLC39A7;ATP6V1E1;SLC16A3;SLC39A1;SLC12A7;SLC39A4;SLC30A6;SLC38A1;ATP6V1G1;ATP6V0E1;SLC6A18;SLC30A3;SLC35C1;ATP11B;ATP11A;ATP1B1;NUP93;PRKAR1A;SLCO2A1;SLC27A6;NUP98;ABCG1;FTL;SLC22A4;ATP6V1A;NUP205;POM121;ABCB1;SEH1L;SLC26A1;ABCB6;ABCB7;SLC1A4;SLC1A5;SLC5A3;NUP160;SLC9A1;GNG10;NUP85;PRKAR2A;TPR;NUP88;ATP6V0A4;RAB11FIP2;SLC38A2;ATP6V1C1;A…
Beta-3 integrin cell surface interactions	12/43	0.692417	0.904174	0	0	0.886653	0.325904	LAMA4;PDGFB;KDR;SPP1;FN1;COL4A5;ITGAV;LAMB1;LAMC1;THY1;F11R;VEGFA
Type 2 diabetes mellitus	14/50	0.693399	0.904174	0	0	0.890731	0.326141	INSR;IRS2;PIK3R2;PIK3CB;PIK3R1;TNF;MTOR;HK1;IKBKB;MAPK9;PKM;INS-IGF2;PIK3CA;MAPK1
Matrix metalloproteinases	8/29	0.694676	0.904174	0	0	0.872631	0.317908	MMP13;MMP1;MMP15;TIMP2;TCF20;TIMP1;TNF;MMP10
Pre-NOTCH expression and processing	16/57	0.695081	0.904174	0	0	0.893807	0.325102	CREBBP;JUN;B4GALT1;MAML2;MAML1;SEL1L;ATP2A3;ATP2A2;CCND1;POFUT1;AGO4;MFNG;AGO2;EP300;TMED2;TNRC6A
ALK2 pathway	3/11	0.69712	0.904174	0	0	0.859092	0.309958	ACVR1;SMAD1;SMAD4
Acetylcholine neurotransmitter release cycle	3/11	0.69712	0.904174	0	0	0.859092	0.309958	STXBP1;CPLX1;STX1A
Apoptotic cleavage of cell adhesion proteins	3/11	0.69712	0.904174	0	0	0.859092	0.309958	TJP1;CASP3;DSG2
B lymphocyte cell surface molecules	3/11	0.69712	0.904174	0	0	0.859092	0.309958	CD40;CR2;ICAM1
CD28-dependent Vav1 pathway	3/11	0.69712	0.904174	0	0	0.859092	0.309958	CDC42;RAC1;PAK2
Cardiac protection against reactive oxygen species	3/11	0.69712	0.904174	0	0	0.859092	0.309958	GPX1;SOD2;SOD1
Cystic fibrosis transmembrane conductance regulator (CFTR) and beta 2 adrenergic receptor (b2AR) pathway	3/11	0.69712	0.904174	0	0	0.859092	0.309958	SLC9A3R1;PRKAR1A;PRKAR2A
Down syndrome cell adhesion molecule (DSCAM) interactions	3/11	0.69712	0.904174	0	0	0.859092	0.309958	DCC;RAC1;NTN1
Glutathione biosynthesis and recycling	3/11	0.69712	0.904174	0	0	0.859092	0.309958	GGT7;GSS;CNDP2
Keratan sulfate degradation	3/11	0.69712	0.904174	0	0	0.859092	0.309958	HEXB;HEXA;KERA
Mechanism of protein import into the nucleus	3/11	0.69712	0.904174	0	0	0.859092	0.309958	RANBP2;NUP153;KPNA2
Norepinephrine neurotransmitter release cycle	3/11	0.69712	0.904174	0	0	0.859092	0.309958	STXBP1;CPLX1;STX1A
Telomerase protein component gene hTERT transcriptional regulation	3/11	0.69712	0.904174	0	0	0.859092	0.309958	HDAC1;WT1;ESR1
Tryptophan catabolism	3/11	0.69712	0.904174	0	0	0.859092	0.309958	AFMID;IDO2;KMO
Vitamin C in the brain	3/11	0.69712	0.904174	0	0	0.859092	0.309958	COL4A2;COL4A5;P4HB
BRCA1, BRCA2 and ATR roles in cancer susceptibility	6/22	0.700459	0.90691	0	0	0.859022	0.305829	RAD50;RAD51;FANCD2;CHEK1;ATM;RAD1
Glycosaminoglycan biosynthesis: chondroitin sulfate	6/22	0.700459	0.90691	0	0	0.859022	0.305829	CSGALNACT1;CHST12;CSGALNACT2;DSE;XYLT1;B3GALT6
Fluoropyrimidine activity	9/33	0.712413	0.91921	0	0	0.858953	0.291269	SMUG1;RRM2;FPGS;GGH;MTHFR;UPP1;TYMS;SLC29A1;SLC22A7
Glucagon-type ligand receptors	9/33	0.712413	0.91921	0	0	0.858953	0.291269	GNG10;GNG5;GNG7;GHRH;GNB1;GNAS;GNB4;GNG11;GNG13
Cytochrome P450 metabolism of endogenous sterols	4/15	0.714319	0.91921	0	0	0.833016	0.280248	CYP27A1;CYP39A1;POMC;CYP11B2
Erythrocyte differentiation pathway	4/15	0.714319	0.91921	0	0	0.833016	0.280248	IL11;CSF3;TGFB2;IL9
Glycosphingolipid biosynthesis: ganglio series	4/15	0.714319	0.91921	0	0	0.833016	0.280248	HEXB;HEXA;B3GALT4;ST3GAL1
Prolactin receptor signaling pathway	4/15	0.714319	0.91921	0	0	0.833016	0.280248	CUL1;PTPN11;RBX1;SKP1
Repression of pain sensation by the transcriptional regulator DREAM	4/15	0.714319	0.91921	0	0	0.833016	0.280248	JUN;PRKAR1A;PRKAR2A;CREM
Interaction between L1-type proteins and ankyrins	7/26	0.718169	0.921754	0	0	0.843909	0.279377	SCN8A;ANK2;SCN4A;ANK3;SCN3B;SPTBN1;SCN1A
Segmentation clock	7/26	0.718169	0.921754	0	0	0.843909	0.279377	GSK3B;ADAM17;PROC;CSNK2A1;HES1;PSEN1;LRP6
Selenoamino acid metabolism	7/26	0.718169	0.921754	0	0	0.843909	0.279377	GGT7;MAT2A;CBS;CTH;SEPHS1;LCMT1;PAPSS1
Heart development	12/44	0.725421	0.930254	0	0	0.858883	0.275704	BMP4;FOXC2;SMAD1;SMAD4;BMP2;HEY1;GATA6;MAPK1;NFATC2;PTPN11;NKX2-5;VEGFA
Platelet aggregation (plug formation)	10/37	0.728352	0.930917	0	0	0.848305	0.268888	PTPN1;RAP1A;VWF;PDPK1;FN1;SOS1;TLN1;CRK;PTK2;BCAR1
Alpha-linolenic acid metabolism	5/19	0.730027	0.930917	0	0	0.818099	0.257434	FADS2;PLA2G12A;ACOX1;PLA2G2A;PLA2G4A
Calcineurin in effects in keratinocyte differentiation	5/19	0.730027	0.930917	0	0	0.818099	0.257434	PPP3CA;CDKN1A;GNAQ;NFATC2;CALM1
Class C GPCRs (metabotropic glutamate and pheromone receptors)	5/19	0.730027	0.930917	0	0	0.818099	0.257434	CASR;GPRC5B;GRM4;TAS1R3;GRM1
G-protein-independent seven transmembrane receptor signaling	5/19	0.730027	0.930917	0	0	0.818099	0.257434	MAPK9;MAPK7;GRK5;GRK4;MAPK1
Mitochondrial gene expression	5/19	0.730027	0.930917	0	0	0.818099	0.257434	ESRRA;PPP3CA;MYEF2;GABPA;HCFC1
Extracellular matrix organization	26/93	0.730354	0.930917	0	0	0.888606	0.279223	PRSS1;COL13A1;COL11A1;COL12A1;PLOD2;ADAMTS14;TIMP2;SERPINH1;COL10A1;TIMP1;CRTAP;MMP1;CMA1;CTRB2;MMP10;MMP13;BMP1;COL4A2;MMP15;COL6A2;COL7A1;COL6A1;COL4A5;TLL1;P4HB;PPIB
TRAF6-mediated IRF7 activation	8/30	0.733969	0.934719	0	0	0.832906	0.257608	CREBBP;MAVS;DDX58;IFNA2;EP300;TRIM25;TANK;IFNA21
Blood clotting cascade	6/23	0.744372	0.941962	0	0	0.808434	0.238661	F8A1;F8;F8A2;F8A3;VWF;SERPINE1
Proximal tubule bicarbonate reclamation	6/23	0.744372	0.941962	0	0	0.808434	0.238661	GLUD2;MDH1;CA2;CA4;ATP1B1;AQP1
Th1/Th2 differentiation pathway	6/23	0.744372	0.941962	0	0	0.808434	0.238661	CD40;CD40LG;IFNG;IFNGR2;NR1I2;IL12A
Fructose and mannose metabolism	9/34	0.748245	0.941962	0	0	0.824535	0.239136	MTMR1;MTMR2;FPGT;PMM2;AKR1B1;ALDOA;PHPT1;MTMR6;HK1
Monoamine transport	9/34	0.748245	0.941962	0	0	0.824535	0.239136	ACHE;TGFB1I1;CDC25C;SLC6A2;TNF;PVRL2;STX1A;SLC6A4;SCAMP2
Myc repressed pathway	20/73	0.749898	0.941962	0	0	0.864118	0.248709	ITGB1;CDKN1A;SMAD4;SMAD3;HDAC1;GADD45A;NFYC;GTF2H2;CLU;LGALS1;CCND1;PPP2R4;FTH1;CCL5;ID2;TMEM126A;SFXN3;EP300;ITGA6;ALDH9A1
Aflatoxin B1 metabolism	2/8	0.752288	0.941962	0	0	0.763621	0.217354	AKR7A2;GSTM1
Binding of orexin and neuropeptides FF and QRFP to their receptors	2/8	0.752288	0.941962	0	0	0.763621	0.217354	QRFPR;HCRTR1
Bystander B cell activation	2/8	0.752288	0.941962	0	0	0.763621	0.217354	CD40;CD40LG
Codeine and morphine metabolism	2/8	0.752288	0.941962	0	0	0.763621	0.217354	ABCB1;UGT2B7
Cross-presentation of particulate exogenous antigens (phagosomes)	2/8	0.752288	0.941962	0	0	0.763621	0.217354	CYBA;ITGAV
Digestion of dietary carbohydrate	2/8	0.752288	0.941962	0	0	0.763621	0.217354	AMY1A;LCT
Glycogen biosynthesis	2/8	0.752288	0.941962	0	0	0.763621	0.217354	UGP2;GYG1
Insulin secretion regulation by fatty acids bound to GPR40 (FFAR1)	2/8	0.752288	0.941962	0	0	0.763621	0.217354	GNAQ;PLCB1
Nef-induced signal transduction	2/8	0.752288	0.941962	0	0	0.763621	0.217354	RAC1;PAK2
TSP1-induced apoptosis in microvascular endothelial cell	2/8	0.752288	0.941962	0	0	0.763621	0.217354	JUN;CASP3
Transport of nucleotide sugars	2/8	0.752288	0.941962	0	0	0.763621	0.217354	SLC35A2;SLC35C1
Taste transduction	14/52	0.752856	0.941962	0	0	0.843729	0.239519	TAS2R9;TAS2R31;TAS2R43;KCNB1;ADCY4;ITPR3;GNG13;SCNN1G;GRM4;SCNN1B;GNB1;GNAS;TAS2R1;TAS1R3
Melanogenesis	28/101	0.753002	0.941962	0	0	0.878216	0.249139	GSK3B;CAMK2D;CAMK2A;TYRP1;ADCY4;ADCY2;GNAI1;GNAI2;EDNRB;EP300;MAPK1;HRAS;CAMK2G;TCF7L2;CREBBP;EDN1;TCF7L1;WNT9B;FZD8;POMC;CREB3;MC1R;GNAQ;GNAS;KRAS;RAF1;CALM1;PLCB1
Interleukin-3, interleukin-5, and GM-CSF signaling	12/45	0.756053	0.941962	0	0	0.832796	0.232886	YES1;PIK3CA;INPP5D;IL3RA;PIK3R2;PTPN11;PIK3CB;PIK3R1;CBL;SOS1;HRAS;CRK
Bile salt and organic anion SLC transporters	3/12	0.75638	0.941962	0	0	0.763582	0.213201	SLC10A6;SLC16A1;SLC16A3
Dopamine neurotransmitter release cycle	3/12	0.75638	0.941962	0	0	0.763582	0.213201	STXBP1;CPLX1;STX1A
Iron metabolism in placenta	3/12	0.75638	0.941962	0	0	0.763582	0.213201	HEPHL1;FTH1;MCOLN1
Parkin role in the ubiquitin-proteasomal pathway	3/12	0.75638	0.941962	0	0	0.763582	0.213201	UBE2F;UBE2L6;PARK2
Pyrimidine catabolism	3/12	0.75638	0.941962	0	0	0.763582	0.213201	NT5C3A;NT5E;UPP1
Glycolysis	7/27	0.757526	0.941962	0	0	0.801656	0.222618	GPI;PPP2R1B;PPP2R1A;PGK1;ENO1;ALDOA;HK1
Oxidative stress	7/27	0.757526	0.941962	0	0	0.801656	0.222618	NQO1;MGST1;MT1X;CYBA;SOD2;TXN2;SOD1
Proteins and DNA sequences in cardicac structures	7/27	0.757526	0.941962	0	0	0.801656	0.222618	BMP2;JAG1;ATP2A2;NFATC2;PTPN11;NKX2-5;SMAD6
EGFR interaction with phospholipase C-gamma	10/38	0.761264	0.945018	0	0	0.81795	0.223116	NTRK1;PRKAR1A;PRKAR2A;ADCY4;ITPR2;MAPK1;PLA2G4A;ADCY2;ITPR3;CALM1
Nuclear receptors	10/38	0.761264	0.945018	0	0	0.81795	0.223116	ESRRA;NR1H2;NR1I2;RARA;NR1D2;PGR;PPARG;NR2C2;NR3C1;ESR1
Acyl chain remodelling of phosphatidylinositol	4/16	0.764576	0.945154	0	0	0.763544	0.204961	PLA2G16;PLA2G12A;PLA2G2A;PLA2G4A
Ghrelin biosynthesis, secretion, and deacylation	4/16	0.764576	0.945154	0	0	0.763544	0.204961	BCHE;SPCS3;SPCS1;SEC11A
Glutamate neurotransmitter release cycle	4/16	0.764576	0.945154	0	0	0.763544	0.204961	STXBP1;CPLX1;SLC38A2;STX1A
JNK (c-Jun kinases) phosphorylation and activation mediated by activated human TAK1	4/16	0.764576	0.945154	0	0	0.763544	0.204961	MAPK9;TAB2;MAP2K7;MAP3K7
Sonic Hedgehog (Shh) pathway	4/16	0.764576	0.945154	0	0	0.763544	0.204961	GSK3B;PRKAR1A;PRKAR2A;DYRK1B
Amino acid and oligopeptide SLC transporters	13/49	0.768236	0.94809	0	0	0.826971	0.218038	SLC38A1;SLC6A18;SLC43A2;SLC43A1;SLC1A4;SLC3A2;SLC7A11;SLC1A5;SLC7A1;SLC7A5;SLC6A6;SLC7A9;SLC38A2
Muscle contraction	13/49	0.768236	0.94809	0	0	0.826971	0.218038	ITGA1;MYL6B;SORBS1;SORBS3;ACTG2;MYL12B;MYL6;TNNT1;MYL2;VIM;TLN1;CALM1;MYH6
Transport of vitamins, nucleosides, and related molecules	8/31	0.769646	0.949037	0	0	0.796636	0.208579	SLC35A2;SLCO4A1;SLC35C1;SLCO2A1;SLC27A6;SLC29A1;SLC29A3;SLC28A3
Seven transmembrane receptor signaling through beta-arrestin	20/74	0.772885	0.951125	0	0	0.848055	0.218481	MAP2K3;MAP3K1;PDE4C;PDE2A;ACTB;ACTG2;RHOA;ACTG1;NFKBIA;MAPK9;MAPK7;GRK5;GRK4;AKT3;MDM2;PDE3A;MAPK1;PDE7B;RAF1;MAP2K6
Interleukin-3 regulation of hematopoietic cells	5/20	0.773917	0.951125	0	0	0.763505	0.195679	CXCL8;IL3RA;TGFA;ENPP3;TNF
Signaling by Hippo	5/20	0.773917	0.951125	0	0	0.763505	0.195679	TJP1;WWTR1;LATS2;CASP3;STK3
Urea cycle and metabolism of amino groups	5/20	0.773917	0.951125	0	0	0.763505	0.195679	ARG2;ODC1;ASL;CKB;SRM
Autophagy regulation	9/35	0.780862	0.958065	0	0	0.792765	0.196096	GABARAPL2;PRKAA1;IFNA13;IFNG;IFNA2;ULK3;ATG4B;ULK2;IFNA21
Linoleic acid metabolism	9/35	0.780862	0.958065	0	0	0.792765	0.196096	FADS2;CYP2C9;PLA2G12A;ELOVL5;PLA2G2A;PLA2G4A;CYP2C19;CYP3A5;FADS1
Dorso-ventral axis formation	6/24	0.783432	0.959623	0	0	0.763466	0.18634	PIWIL4;MAPK1;KRAS;SOS1;ETS1;ETV6
Ras-independent pathway in NK cell-mediated cytotoxicity	6/24	0.783432	0.959623	0	0	0.763466	0.18634	ITGB1;PIK3CA;HLA-A;PIK3R1;RAC1;B2M
Angiotensin II-stimulated signaling through G-proteins and beta-arrestin	17/64	0.786801	0.960471	0	0	0.828214	0.19859	MAP2K3;PRKCH;MAP3K1;ITPR2;ITPR3;ARRB2;RHOA;MAPK9;MAPK7;GRK5;GNAQ;PLCG2;ORAI1;MAPK1;PLCB1;RAF1;MAP2K6
Collagen biosynthesis and modifying enzymes	17/64	0.786801	0.960471	0	0	0.828214	0.19859	CRTAP;COL13A1;COL11A1;COL12A1;PLOD2;ADAMTS14;BMP1;COL4A2;COL6A2;COL7A1;COL6A1;SERPINH1;COL10A1;COL4A5;TLL1;P4HB;PPIB
FRS2-mediated cascade	10/39	0.791284	0.960471	0	0	0.789688	0.184865	KLB;FGF7;CDK1;MAPK1;FRS2;PTPN11;KRAS;RAF1;SOS1;HRAS
Glycosaminoglycan metabolism	30/110	0.791301	0.960471	0	0	0.858463	0.200947	B4GALT3;B4GALT1;IDUA;HEXB;SDC3;HEXA;HMMR;SLC9A1;SGSH;NDST1;NAGLU;CHST12;HYAL2;DSE;HAS2;GUSB;ST3GAL1;GPC6;CSGALNACT1;CHST6;GLCE;CSGALNACT2;BGN;KERA;B3GALT6;EXT1;B3GNT7;AGRN;CHST2;B4GALT5
Glycolysis and gluconeogenesis	20/75	0.794411	0.960471	0	0	0.832575	0.191621	GPI;ACSS2;PDHA1;GOT1;MDH1;MDH2;GOT2;AKR1A1;ENO1;PDHB;ADH5;HK1;ALDH3A2;PKM;PGK1;ALDOA;ALDH7A1;DLD;LDHAL6A;ALDH9A1
CD8/T cell receptor downstream pathway	18/68	0.796624	0.960471	0	0	0.824275	0.187417	IFNA13;JUN;IFNA2;NFATC2;BRAF;HLA-A;CD3D;TNF;PPP3CA;MAPK9;PPP3R1;IFNG;MAPK1;KRAS;RAF1;B2M;HRAS;IFNA21
Glucose metabolism	16/61	0.799749	0.960471	0	0	0.814123	0.181922	GPI;GOT1;MDH1;MDH2;GOT2;PHKB;ENO1;UGP2;PPP2R1B;PPP2R1A;PHKG2;PGK1;ALDOA;CALM1;GYG1;SLC25A11
Porphyrin and chlorophyll metabolism	11/43	0.801001	0.960471	0	0	0.78718	0.17467	UGT2B10;FECH;UROD;FTH1;HMBS;BLVRB;EPRS;GUSB;BLVRA;UGT2B7;FTL
Fibrin clot formation (clotting cascade)	8/32	0.801722	0.960471	0	0	0.763388	0.168704	THBD;F8;PROC;VWF;PROS1;C1QBP;A2M;KNG1
Syndecan 4 pathway	8/32	0.801722	0.960471	0	0	0.763388	0.168704	ITGB1;MDK;CCL5;FN1;RAC1;ITGA5;PTK2;RHOA
Alpha-hemoglobin stabilizing enzyme (AHSP) pathway	3/13	0.805883	0.960471	0	0	0.687175	0.148304	FECH;UROD;HMBS
Angiotensin-converting enzyme 2 regulation of heart function	3/13	0.805883	0.960471	0	0	0.687175	0.148304	COL4A2;CMA1;COL4A5
Arylsulfatase activation	3/13	0.805883	0.960471	0	0	0.687175	0.148304	STS;SUMF2;SUMF1
CBL-mediated ligand-induced downregulation of EGF receptors	3/13	0.805883	0.960471	0	0	0.687175	0.148304	SH3GLB1;SH3KBP1;CBL
Ghrelin-mediated regulation of food intake and energy homeostasis	3/13	0.805883	0.960471	0	0	0.687175	0.148304	IGFBP4;GHRH;RAPGEF5
Glucose-dependent insulinotropic polypeptide (GIP) biosynthesis, secretion, and inactivation	3/13	0.805883	0.960471	0	0	0.687175	0.148304	SPCS3;SPCS1;SEC11A
Interleukin-22 soluble receptor signaling pathway	3/13	0.805883	0.960471	0	0	0.687175	0.148304	STAT1;STAT3;IL22RA2
NICD trafficking to the nucleus	3/13	0.805883	0.960471	0	0	0.687175	0.148304	CREBBP;MAML2;MAML1
PIP biosynthesis at the early endosome membrane	3/13	0.805883	0.960471	0	0	0.687175	0.148304	FIG4;MTMR2;MTMR4
Platelet adhesion to exposed collagen	3/13	0.805883	0.960471	0	0	0.687175	0.148304	ITGB1;VWF;ITGA2
Signal regulatory protein (SIRP) family interactions	3/13	0.805883	0.960471	0	0	0.687175	0.148304	SIRPA;PTPN11;PTK2
Sulfur metabolism	3/13	0.805883	0.960471	0	0	0.687175	0.148304	CHST12;SUOX;PAPSS1
T helper cell surface molecules	3/13	0.805883	0.960471	0	0	0.687175	0.148304	THY1;CD3D;ICAM1
TACI and BCMA stimulation of B cell immune responses	3/13	0.805883	0.960471	0	0	0.687175	0.148304	TNFRSF17;RELA;TNFSF13B
Acyl chain remodelling of phosphatidylglycerol	4/17	0.807634	0.960471	0	0	0.704759	0.150569	PLA2G12A;LPCAT4;PLA2G2A;PLA2G4A
Cell to cell adhesion signaling	4/17	0.807634	0.960471	0	0	0.704759	0.150569	CTNNA1;PTPN11;PTK2;BCAR1
HIV-1 elongation complex formation in the absence of HIV-1 Tat	4/17	0.807634	0.960471	0	0	0.704759	0.150569	CCNT2;CCNT1;GTF2H2;GTF2H4
Ion channel function in vascular endothelium	4/17	0.807634	0.960471	0	0	0.704759	0.150569	GUCY1A3;GUCY1A2;TRPV4;GNAS
NO2-dependent IL-12 pathway in NK cells	4/17	0.807634	0.960471	0	0	0.704759	0.150569	NOS2;IFNG;IL12A;CD3D
PIP biosynthesis at the Golgi membrane	4/17	0.807634	0.960471	0	0	0.704759	0.150569	ARF3;TPTE2;FIG4;PIK3C2G
Renin-angiotensin system	4/17	0.807634	0.960471	0	0	0.704759	0.150569	CPA3;CTSA;CMA1;LNPEP
Sulfation biotransformation reaction	4/17	0.807634	0.960471	0	0	0.704759	0.150569	G6PD;SULT6B1;PAPSS1;SULT1C4
Generation of second messenger molecules	8/36	0.810292	0.960471	0	0	0.763349	0.160578	VASP;ENAH;HLA-DPB1;CD3D;PAK2;HLA-DQB2;HLA-DPA1;NCK1;HLA-DQB1
Adrenoceptors	2/9	0.810819	0.960471	0	0	0.654486	0.137253	ADRB1;ADRA1B
Alpha defensins	2/9	0.810819	0.960471	0	0	0.654486	0.137253	DEFA4;DEFA3
Bicarbonate transporters	2/9	0.810819	0.960471	0	0	0.654486	0.137253	SLC4A7;SLC4A2
Calcium/calmodulin-dependent protein kinase activation	2/9	0.810819	0.960471	0	0	0.654486	0.137253	CAMK1;CALM1
Polyadenylation of mRNA	2/9	0.810819	0.960471	0	0	0.654486	0.137253	CPSF1;PABPN1
Pyrimidine salvage reactions	2/9	0.810819	0.960471	0	0	0.654486	0.137253	TK2;UPP1
Tat-mediated elongation of the HIV-1 transcript	2/9	0.810819	0.960471	0	0	0.654486	0.137253	GTF2H2;GTF2H4
Urea cycle	2/9	0.810819	0.960471	0	0	0.654486	0.137253	ARG2;ASL
Oxidative stress-induced gene expression via Nrf2	5/21	0.812105	0.960471	0	0	0.715734	0.148962	JUN;AKR7A2;POR;KEAP1;MAPK1
p38 MK2 pathway	5/21	0.812105	0.960471	0	0	0.715734	0.148962	MAPKAPK2;HSPB1;TCF3;RAF1;YWHAH
IGF1 receptor signaling through beta-arrestin	6/25	0.817775	0.966402	0	0	0.723231	0.145491	MAPK9;MAPK7;PIK3CA;INSR;AKT3;MAPK1
Innate immune system	90/319	0.818658	0.966671	0	0	0.898935	0.179867	ATF1;APP;ATF2;OTUD5;HSP90AB1;PRKCSH;PROS1;IFNA2;UBE2L6;C4BPB;C8A;CTSS;EEA1;IKBKB;PYCARD;CASP9;LGALS3;PPP2R1B;PPP2R1A;CTSL;RPS6KA1;TRIM25;EP300;MAP3K7;MEF2A;DUSP4;MAP2K3;DUSP3;TICAM2;DDX58;IRAK3;IRAK4;TICAM1;DUSP6;DDOST;MAPKAPK2;PELI1;TAX1BP1;TXNIP;UBE2V1;UBA52;BIRC3;DEFB103A;C1QA;UBA7;CFI;PELI2;LY96;TXN;NLRC4;MEFV;DEFB107A;DEFB121;TANK;RELA;HSP90B1;MAPK9;MAPK7;UBB;PCBP2;UBC;PLCG2;MAPK1;RIPK1;FADD…
Pentose and glucuronate interconversions	7/29	0.823955	0.972149	0	0	0.728673	0.1411	UGT2B10;UGP2;RPE;DCXR;AKR1B1;GUSB;UGT2B7
Endochondral ossification	17/66	0.829276	0.976069	0	0	0.794295	0.148694	TGFB2;CAB39;PTH;STAT1;IGF2;VEGFA;ADAMTS4;MMP13;SCIN;KIF3A;MGP;SERPINH1;SPP1;COL10A1;CALM1;SLC38A2;DDR2
Differentiation pathway in PC12 cells	22/84	0.830291	0.976069	0	0	0.812291	0.151069	ATF1;MAP2K3;NTRK1;CREBBP;JUN;MAP3K1;ANXA2;ADCY4;FRS2;ADCY2;BRAF;PTPN11;MAPK9;RAP1A;GNAQ;AKT3;PLCG2;KRAS;EPHB2;PLCB1;HRAS;MAP2K6
Chondroitin sulfate/dermatan sulfate metabolism	12/48	0.833548	0.976069	0	0	0.763232	0.138957	CSGALNACT1;IDUA;CHST12;HEXB;HEXA;SDC3;DSE;CSGALNACT2;BGN;B3GALT6;AGRN;GPC6
Transport of inorganic cations/anions and amino acids/oligopeptides	25/95	0.835398	0.976069	0	0	0.817498	0.147025	SLC24A1;SLC26A1;SLC43A2;SLC43A1;SLC1A4;SLC3A2;SLC4A2;SLC7A11;SLC1A5;SLC7A1;SLC9A1;SLC12A7;SLC38A2;SLC12A2;SLC38A1;SLC12A4;SLC6A18;SLC8B1;SLC4A7;SLC8A3;SLC7A5;SLC6A6;SLC7A9;SLC26A4;SLC26A6
Abacavir metabolism	1/5	0.836536	0.976069	0	0	0.572704	0.102219	GUK1
Abacavir transmembrane transport	1/5	0.836536	0.976069	0	0	0.572704	0.102219	ABCB1
Axonal growth stimulation	1/5	0.836536	0.976069	0	0	0.572704	0.102219	RHOA
Disinhibition of SNARE formation	1/5	0.836536	0.976069	0	0	0.572704	0.102219	STX4
FasL/CD95L signaling	1/5	0.836536	0.976069	0	0	0.572704	0.102219	FADD
GDP-mannose biosynthesis	1/5	0.836536	0.976069	0	0	0.572704	0.102219	PMM2
Glyoxylate metabolism	1/5	0.836536	0.976069	0	0	0.572704	0.102219	AGXT
Kit receptor transcriptional targets	1/5	0.836536	0.976069	0	0	0.572704	0.102219	VEGFA
Tachykinin receptors bind tachykinins	1/5	0.836536	0.976069	0	0	0.572704	0.102219	TACR1
UDP-N-acetyl-glucosamine biosynthesis	1/5	0.836536	0.976069	0	0	0.572704	0.102219	GNPNAT1
Granule cell survival pathway	26/99	0.842296	0.979751	0	0	0.815217	0.13991	GSK3B;KCNK6;GSK3A;ADCY4;ADCY2;CASP9;KCNV1;KCNT2;PPP2R4;CASP3;POLR2C;AKT3;PLCG2;CYC1;EPHB2;POLR2J;MAP2K6;MAP2K3;CREBBP;JUN;MAP3K1;KCNK15;CREB3;GNAQ;CYCS;PLCB1
Sodium/chloride-dependent neurotransmitter transporters	4/18	0.844029	0.979751	0	0	0.654372	0.110961	SLC6A6;SLC6A18;SLC6A9;SLC6A2
Nitric oxide signaling pathway	5/22	0.844943	0.979751	0	0	0.673584	0.11349	PPP3CA;DLG4;PRKAR1A;PRKAR2A;CALM1
Coagulation common pathway	3/14	0.846606	0.979751	0	0	0.62466	0.104018	THBD;PROC;PROS1
Complement cascade regulation	3/14	0.846606	0.979751	0	0	0.62466	0.104018	PROS1;CFI;C4BPB
Osteoblast signaling	3/14	0.846606	0.979751	0	0	0.62466	0.104018	PTH;PDGFB;ITGAV
Retrograde neurotrophin signaling	3/14	0.846606	0.979751	0	0	0.62466	0.104018	NTRK1;CLTC;AP2B1
Visual signal transduction	3/14	0.846606	0.979751	0	0	0.62466	0.104018	GNB1;SAG;SLC25A22
Leptin influence on immune response	29/110	0.847187	0.979751	0	0	0.819408	0.135885	CSF3R;ITGAM;TNF;CD3D;CTSS;CX3CL1;CXCL16;IFIT2;ACAT1;ALCAM;BGLAP;CCL5;TNFSF10;CD38;BANF1;TIMP1;CCL18;CCR1;CPT1A;EDN1;CAMLG;IL13;LIFR;VEGFA;AIMP1;IFNG;OAS2;ALOX5AP;PPARG
Glycosaminoglycan biosynthesis: heparan sulfate	6/26	0.847657	0.979751	0	0	0.68702	0.11355	EXT1;NDST1;EXTL2;GLCE;XYLT1;B3GALT6
Selective expression of chemokine receptors during T-cell polarization	6/26	0.847657	0.979751	0	0	0.68702	0.11355	CCR1;TGFB2;CD40LG;IFNG;IFNGR2;CCR4
Termination of O-glycan biosynthesis	6/26	0.847657	0.979751	0	0	0.68702	0.11355	ST6GAL1;ST6GALNAC2;MUCL1;MUC17;ST3GAL1;MUC20
Interleukin-12/STAT4 pathway	11/45	0.848887	0.980071	0	0	0.740768	0.12136	MAPK9;PPP3CA;PPP3R1;CREBBP;JUN;IFNG;IL13;STAT3;IL12A;CD3D;MAP2K6
Calcium regulation in the cardiac cell	40/149	0.849262	0.980071	0	0	0.839715	0.137199	GNAZ;CAMK2D;CAMK2A;ATP2A3;ADCY4;ITPR2;ATP2A2;ADRB1;ITPR3;ADCY2;ARRB2;ADRA1B;GNAI1;GNAI2;RGS5;GJA1;GRK5;GNG5;GRK4;PRKAR2A;GNG7;ANXA6;GJA9;CAMK2G;YWHAH;PRKCH;KCNB1;ATP1B1;GNG11;GNG13;SLC8A3;PRKAR1A;GJB6;GNAQ;PKIA;GNB1;GNAS;GNB4;CAMK1;CALM1
Gap junction trafficking and regulation	7/30	0.851342	0.980934	0	0	0.696941	0.112167	TJP1;GJA1;DAB2;GJB6;CLTC;MYO6;GJA9
Interleukin-2/STAT5 pathway	7/30	0.851342	0.980934	0	0	0.696941	0.112167	CCNA2;ELF1;CCND2;PIK3CA;PTPN11;PIK3R1;SOS1
SMAD2/3 nuclear pathway	21/82	0.856564	0.980934	0	0	0.788006	0.122004	PIAS4;ATF2;HSPA8;CDKN1A;CREBBP;JUN;SMAD4;SMAD3;HDAC1;FOXG1;SERPINE1;LAMC1;NR3C1;ESR1;CDK4;MYOD1;EP300;RBBP7;TCF3;NKX2-5;SKIL
Abacavir transport and metabolism	2/10	0.856655	0.980934	0	0	0.572634	0.0885976	ABCB1;GUK1
Androgen biosynthesis	2/10	0.856655	0.980934	0	0	0.572634	0.0885976	POMC;SRD5A3
Dermatan sulfate biosynthesis	2/10	0.856655	0.980934	0	0	0.572634	0.0885976	DSE;BGN
Ganglio sphingolipid metabolism	2/10	0.856655	0.980934	0	0	0.572634	0.0885976	B3GALT4;ST3GAL1
Insulin secretion regulation by acetylcholine	2/10	0.856655	0.980934	0	0	0.572634	0.0885976	GNAQ;PLCB1
Second messenger role in netrin-1 signaling	2/10	0.856655	0.980934	0	0	0.572634	0.0885976	DCC;NTN1
Taurine and hypotaurine metabolism	2/10	0.856655	0.980934	0	0	0.572634	0.0885976	GGT7;GAD2
G alpha (s) signaling events	33/125	0.858029	0.981745	0	0	0.820834	0.125684	GNAZ;RAMP2;CALCRL;RAMP3;PTH;ADCY4;ADRB1;ADCY2;GNAI1;GNAI2;GNG10;GNG5;HRH2;GNG7;TSHB;PTGDR;TAAR6;FSHB;PDE2A;PDE4C;GPBAR1;GNG11;GNG13;POMC;MC3R;MC1R;GHRH;GNB1;GNAS;GNB4;PDE3A;PDE7B;RAMP1
T cell signal transduction	21/83	0.871572	0.99511	0	0	0.77524	0.106562	MAP2K3;VAV3;PRKCH;MAP3K1;NFATC2;CBLB;CBL;CD3D;PPP3CA;MAPK9;PPP3R1;MAPK7;PRDX1;CTLA4;MAPK1;KRAS;RAF1;SOS1;HRAS;NCK1;MAP2K6
Incretin biosynthesis, secretion, and inactivation	5/23	0.872879	0.99511	0	0	0.636117	0.0864855	TCF7L2;SPCS3;SPCS1;SEC11A;GNG13
Mitochondrial pathway of apoptosis: antiapoptotic Bcl-2 family	5/23	0.872879	0.99511	0	0	0.636117	0.0864855	AVEN;MAPK9;MAPK7;MAPK1;BCL2L14
Insulin regulation of blood glucose	6/27	0.873409	0.99511	0	0	0.654258	0.0885546	GSK3B;INSR;STX4;LNPEP;RHOQ;YWHAH
Inhibition of T cell receptor signaling by activated Csk	4/19	0.874429	0.99511	0	0	0.610703	0.0819468	CREBBP;PRKAR1A;PRKAR2A;CD3D
Tamoxifen metabolism	4/19	0.874429	0.99511	0	0	0.610703	0.0819468	CYP2C9;CYP2C19;CYP3A5;UGT2B7
Telomeres, telomerase, cellular aging, and immortality	4/19	0.874429	0.99511	0	0	0.610703	0.0819468	RB1;TNKS;XRCC5;KRAS
PD-1 signaling	7/31	0.87517	0.995186	0	0	0.667854	0.0890496	HLA-DPB1;PTPN11;PDCD1LG2;CD3D;HLA-DQB2;HLA-DPA1;HLA-DQB1
Primary immunodeficiency	8/35	0.877678	0.995476	0	0	0.67842	0.0885171	CD40;CD40LG;RFX5;RFXAP;TAP2;RFXANK;CD3D;ADA
Cytochrome P450 metabolism of xenobiotics	3/15	0.879678	0.995476	0	0	0.572563	0.0734021	CYP2C9;CYP2C19;CYP3A5
Fibrinolysis pathway	3/15	0.879678	0.995476	0	0	0.572563	0.0734021	SERPINE1;UBA1;UBE2A
Activation of TRKA receptors	1/6	0.886217	0.995476	0	0	0.45813	0.0553393	NTRK1
Alternative NF-kappaB pathway	1/6	0.886217	0.995476	0	0	0.45813	0.0553393	RELB
Assembly of the ORC complex at the origin of replication	1/6	0.886217	0.995476	0	0	0.45813	0.0553393	ORC2
Bile acid and bile salt biosynthesis via 27-hydroxycholesterol	1/6	0.886217	0.995476	0	0	0.45813	0.0553393	CYP27A1
Cell cycle negative regulation by p75 neurotrophin receptor	1/6	0.886217	0.995476	0	0	0.45813	0.0553393	HDAC1
FGFR2b ligand binding and activation	1/6	0.886217	0.995476	0	0	0.45813	0.0553393	FGF7
Fas signaling pathway in hepatocytes	1/6	0.886217	0.995476	0	0	0.45813	0.0553393	YES1
Interleukin-1-beta (IL-1b) processing pathway	1/6	0.886217	0.995476	0	0	0.45813	0.0553393	STS
Klotho-mediated ligand binding	1/6	0.886217	0.995476	0	0	0.45813	0.0553393	KLB
PDGF genes and receptors	1/6	0.886217	0.995476	0	0	0.45813	0.0553393	PDGFB
PIK3C1/B pathway	1/6	0.886217	0.995476	0	0	0.45813	0.0553393	MAPK1
Pre-NOTCH Processing in the endoplasmic reticulum	1/6	0.886217	0.995476	0	0	0.45813	0.0553393	POFUT1
Pregnenolone biosynthesis	1/6	0.886217	0.995476	0	0	0.45813	0.0553393	AKR1B1
Hormone ligand-binding G-protein coupled receptors	2/11	0.892108	0.999996	0	0	0.508971	0.0581085	FSHB;TSHB
Transport of organic anions	2/11	0.892108	0.999996	0	0	0.508971	0.0581085	SLCO4A1;SLCO2A1
NCAM signaling for neurite out-growth	17/70	0.894849	0.999996	0	0	0.734137	0.0815628	PRNP;CACNA1H;PTK2;COL4A2;PTPRA;COL6A2;COL6A1;ST8SIA4;CDK1;COL4A5;MAPK1;KRAS;RAF1;SOS1;AGRN;HRAS;SPTBN1
Ion transport by P-type ATPases	8/36	0.896931	0.999996	0	0	0.654144	0.0711552	ATP8A1;ATP8B1;ATP2A3;ATP2A2;ATP11B;ATP11A;ATP12A;ATP1B1
Steroid hormone, vitamin A, and vitamin D metabolism	8/36	0.896931	0.999996	0	0	0.654144	0.0711552	POMC;RDH11;CYP11B2;SRD5A3;AKR1B1;GC;PNLIP;LGMN
Transport of glucose and other sugars, bile salts and organic acids, metal ions and amine compounds	24/96	0.89817	0.999996	0	0	0.762762	0.0819176	SLC22A4;SLC30A6;SLC10A6;SLC6A18;SLC16A1;SLC30A3;SLC44A2;SLC2A12;SLC39A10;SLC2A6;SLC6A2;SLC39A14;SLC5A3;SLC2A8;SLC2A9;SLC6A6;SLC6A9;SLC39A5;SLC39A8;SLC39A7;SLC16A3;SLC39A1;SLC22A7;SLC39A4
Acute myocardial infarction	4/20	0.899557	0.999996	0	0	0.572493	0.0606001	PROC;COL4A2;PROS1;COL4A5
Chondroitin sulfate biosynthesis	4/20	0.899557	0.999996	0	0	0.572493	0.0606001	CSGALNACT1;CHST12;CSGALNACT2;BGN
Salivary secretion	22/89	0.901755	0.999996	0	0	0.751401	0.0777046	GUCY1A3;SLC12A2;GUCY1A2;AMY1A;AMY1C;ADCY4;ITPR2;ADCY2;ADRB1;ITPR3;SLC4A2;ADRA1B;ATP1B1;STATH;HTN1;SLC9A1;CST3;GNAQ;GNAS;CD38;PLCB1;CALM1
Dilated cardiomyopathy	25/100	0.902074	0.999996	0	0	0.762723	0.0786056	ITGB1;PRKAA1;LAMA2;PRKAG1;ADCY4;ATP2A2;ADRB1;ADCY2;TNF;ACTB;ACTG1;LMNA;DAG1;ITGAV;CACNG1;PRKAB2;TGFB2;ITGA2;ITGA1;MYL2;GNAS;ITGA7;ITGA6;ITGA5;MYH6
Intestinal immune network for IgA production	11/48	0.90322	0.999996	0	0	0.680559	0.0692733	CD40;HLA-DMA;HLA-DMB;CD40LG;HLA-DPB1;TNFRSF17;CCL28;ICOSLG;TNFSF13B;HLA-DPA1;HLA-DQB1
SIDS susceptibility pathways	16/67	0.904338	0.999996	0	0	0.718033	0.0721996	TPH1;CXCL8;CTCF;YBX1;FOXM1;NR3C1;ASCL1;TNF;SLC6A4;HSPD1;HADHA;REST;EP300;HES1;IL6R;CC2D1A
T cell receptor signaling in naive CD4+ T cells	16/67	0.904338	0.999996	0	0	0.718033	0.0721996	PDPK1;PTEN;STK39;PTPN11;BCL10;CBL;CD3D;IKBKB;CDC42;RAP1A;ORAI1;FLNA;KRAS;SOS1;HRAS;NCK1
Heparan sulfate/heparin glycosaminoglycan (HS-GAG) metabolism	12/52	0.905757	0.999996	0	0	0.686711	0.0679734	EXT1;NDST1;NAGLU;IDUA;GLCE;SDC3;BGN;B3GALT6;GUSB;AGRN;GPC6;SGSH
Amine-derived hormones	3/16	0.90624	0.999996	0	0	0.528482	0.0520295	TPH1;AANAT;TSHB
KIT signaling regulation	3/16	0.90624	0.999996	0	0	0.528482	0.0520295	YES1;CBL;SOS1
LPA4-mediated signaling events	3/16	0.90624	0.999996	0	0	0.528482	0.0520295	ADCY4;GNAS;ADCY2
Rap1 signaling	3/16	0.90624	0.999996	0	0	0.528482	0.0520295	RAP1GAP2;RAP1A;RAF1
Drug metabolism: cytochrome P450	20/83	0.91682	0.999996	0	0	0.726432	0.0630864	UGT2B10;GSTM4;GSTK1;GSTM3;GSTM2;GSTM1;GSTO1;GSTP1;MGST3;AKR1C1;MGST1;AKR1C3;MGST2;AKR1C2;CYP2C19;CYP3A5;ADH5;CYP2C9;GSTA4;UGT2B7
Beta-arrestins in GPCR desensitization	2/12	0.919253	0.999996	0	0	0.458041	0.0385643	GNAS;PLCB1
Gamma-aminobutyric acid receptor life cycle	2/12	0.919253	0.999996	0	0	0.458041	0.0385643	NSF;UBQLN1
Hormone-sensitive lipase (HSL)-mediated triacylglycerol hydrolysis	2/12	0.919253	0.999996	0	0	0.458041	0.0385643	PPP1CB;FABP4
Phospholipase C epsilon pathway	2/12	0.919253	0.999996	0	0	0.458041	0.0385643	PRKAR1A;PRKAR2A
Nicotine activity on dopaminergic neurons	4/21	0.920134	0.999996	0	0	0.538778	0.0448459	CDK5;GNB1;ADCY2;GNAI1
Arylamine metabolism	1/7	0.9208	0.999996	0	0	0.381748	0.0314991	NAT1
Caffeine metabolism	1/7	0.9208	0.999996	0	0	0.381748	0.0314991	NAT1
FXR and LXR regulation of cholesterol metabolism	1/7	0.9208	0.999996	0	0	0.381748	0.0314991	LDLR
Gene expression regulation in late stage pancreatic bud precursor cells	1/7	0.9208	0.999996	0	0	0.381748	0.0314991	HES1
Glucocorticoid biosynthesis	1/7	0.9208	0.999996	0	0	0.381748	0.0314991	POMC
Highly sodium permeable acetylcholine nicotinic receptors	1/7	0.9208	0.999996	0	0	0.381748	0.0314991	CHRNE
Interleukin-1 processing	1/7	0.9208	0.999996	0	0	0.381748	0.0314991	RELA
Mineralocorticoid biosynthesis	1/7	0.9208	0.999996	0	0	0.381748	0.0314991	CYP11B2
Nef-mediated CD8 downregulation	1/7	0.9208	0.999996	0	0	0.381748	0.0314991	AP2B1
Neurofascin interactions	1/7	0.9208	0.999996	0	0	0.381748	0.0314991	CNTN1
Phosphatidylglycerol biosynthesis	1/7	0.9208	0.999996	0	0	0.381748	0.0314991	PLD1
SARS coronavirus protease	1/7	0.9208	0.999996	0	0	0.381748	0.0314991	FBL
Terminal pathway of complement	1/7	0.9208	0.999996	0	0	0.381748	0.0314991	C8A
Wnt/LRP6 signaling	1/7	0.9208	0.999996	0	0	0.381748	0.0314991	LRP6
Inositol phosphate metabolism	13/57	0.920972	0.999996	0	0	0.676223	0.0556703	ISYNA1;INPP1;PTEN;PIK3C2G;PIK3CB;SYNJ2;PIK3CA;INPP5J;PLCG2;PIP4K2A;PIP5K1C;PLCB1;CDIPT
Complement activation, classical pathway	3/17	0.92737	0.999996	0	0	0.490698	0.0369999	C1QA;C8A;C1QC
Dendritic cells in regulating TH1 and TH2 development	3/17	0.92737	0.999996	0	0	0.490698	0.0369999	CD40;IFNG;IL13
Insulin-like growth factor (IGF) activity regulation by insulin-like growth factor binding proteins (IGFBPs)	3/17	0.92737	0.999996	0	0	0.490698	0.0369999	IGFBP4;MMP1;IGF2
Interleukin-7 interactions in immune response	7/34	0.928339	0.999996	0	0	0.59352	0.0441332	JUN;CXCL11;CXCL8;CCL8;UBC;BRAF;CXCL3
Nuclear receptors in lipid metabolism and toxicity	7/34	0.928339	0.999996	0	0	0.59352	0.0441332	CYP2C9;ABCB1;NR1I2;RARA;PPARG;ABCB11;ABCG1
Heparan sulfate/heparin glycosaminoglycan (HS-GAG) biosynthesis	6/30	0.929723	0.999996	0	0	0.572352	0.0417067	EXT1;NDST1;GLCE;SDC3;AGRN;GPC6
Ovarian infertility genes	6/30	0.929723	0.999996	0	0	0.572352	0.0417067	CCND2;SMAD3;CDK4;NRIP1;ATM;PGR
Ascorbate and aldarate metabolism	5/26	0.932368	0.999996	0	0	0.545125	0.0381736	UGT2B10;ALDH3A2;ALDH7A1;UGT2B7;ALDH9A1
Tetrasaccharide linker sequence formation in glycosaminoglycan biosynthesis	5/26	0.932368	0.999996	0	0	0.545125	0.0381736	SDC3;BGN;B3GALT6;AGRN;GPC6
Cytosolic sulfonation of small molecules	2/13	0.939866	0.999996	0	0	0.416371	0.0258226	PAPSS1;SULT1C4
Organic cation/anion/zwitterion transport	2/13	0.939866	0.999996	0	0	0.416371	0.0258226	SLC22A4;SLC22A7
T cell receptor signaling in naive CD8+ T cells	15/55	0.94091	0.999996	0	0	0.638663	0.0388995	IKBKB;RAP1A;PDPK1;ORAI1;KRAS;HLA-A;BCL10;SOS1;CBL;CD3D;B2M;HRAS
MEF2D role in T cell apoptosis	7/35	0.941004	0.999996	0	0	0.572282	0.0347992	PPP3CA;HDAC1;EP300;NFATC2;CALM1;CD3D;CABIN1
Pertussis toxin-insensitive CCR5 signaling in macrophage	3/18	0.944038	0.999996	0	0	0.457952	0.0263728	JUN;GNAQ;CALM1
BRCA1-dependent ubiquitin ligase activity	1/8	0.944873	0.999996	0	0	0.327189	0.0185533	FANCD2
Dissolution of fibrin clot	1/8	0.944873	0.999996	0	0	0.327189	0.0185533	SERPINE1
Eosinophils in the chemokine network of allergy	1/8	0.944873	0.999996	0	0	0.327189	0.0185533	CCL5
Gene expression regulation in early pancreatic precursor cells	1/8	0.944873	0.999996	0	0	0.327189	0.0185533	NKX6-1
Glucocorticoid and mineralcorticoid metabolism	1/8	0.944873	0.999996	0	0	0.327189	0.0185533	CYP11B2
Hydrolysis of lysophosphatidylcholine (LPC)	1/8	0.944873	0.999996	0	0	0.327189	0.0185533	PLA2G4A
Lysosphingolipid and lysophosphatidic acid (LPA) G-protein coupled receptors	1/8	0.944873	0.999996	0	0	0.327189	0.0185533	S1PR3
Mechanism of acetaminophen activity and toxicity	1/8	0.944873	0.999996	0	0	0.327189	0.0185533	COX2
Organic cation transport	1/8	0.944873	0.999996	0	0	0.327189	0.0185533	SLC22A4
Support of platelet aggregation by Eph kinases and ephrins	1/8	0.944873	0.999996	0	0	0.327189	0.0185533	ITGB1
Thyroxine biosynthesis	1/8	0.944873	0.999996	0	0	0.327189	0.0185533	TSHB
Drug metabolism: other enzymes	11/52	0.94945	0.999996	0	0	0.613986	0.0318488	UGT2B10;NAT1;IMPDH2;TK2;UPP1;HPRT1;GUSB;CYP3A5;UGT2B7;ITPA;UCKL1
Steroid hormone biosynthesis	12/56	0.949781	0.999996	0	0	0.624103	0.0321562	UGT2B10;STS;CYP11B2;AKR1C1;HSD17B2;SRD5A3;AKR1C3;AKR1C2;COMT;HSD17B7;CYP3A5;UGT2B7
Visual signal transduction: rods	4/23	0.950309	0.999996	0	0	0.481995	0.0245665	SLC24A1;RGS9BP;GNB1;SAG
Neurotransmitter release cycle	7/36	0.951642	0.999996	0	0	0.552508	0.0273857	HSPA8;STXBP1;DNAJC5;GAD2;CPLX1;SLC38A2;STX1A
Acetylcholine binding and downstream events	2/14	0.955409	0.999996	0	0	0.381646	0.0174092	CHRNA1;CHRNE
Gastrin-CREB signaling pathway via PKC and MAPK	52/206	0.956338	0.999996	0	0	0.771664	0.0344498	DGKG;APP;TRIO;DGKD;DAGLA;DGKA;HTR2B;ADRA1B;EDNRB;RPS6KA1;GAST;QRFPR;HRAS;PROK1;EDN1;CASR;PRKCH;ANXA1;TACR1;PIK3CA;DGKQ;XCL2;PLCB1;RAF1;DAGLB;SOS1;HBEGF;DGKH;ITPR2;PIK3R2;ITPR3;PIK3R1;KNG1;GNG10;HRH1;MAPK7;GRK5;GNG5;GNG7;MAPK1;GNG11;GNG13;HCRTR1;LPAR6;NMS;GNAQ;GNB1;SAA1;CDK1;GNB4;F2RL1;KRAS
Nitric oxide stimulation of guanylate cyclase	5/28	0.956716	0.999996	0	0	0.497651	0.0220203	GUCY1A3;GUCY1A2;NOS2;PDE2A;PDE3A
Hematopoietic cell lineage	20/88	0.956827	0.999996	0	0	0.672775	0.0296914	IL11;CSF3;CR2;CSF3R;ITGAM;CSF1;ITGA2;ITGA1;FLT3LG;CD3D;TNF;IL7;IL3RA;CD38;CD9;ITGA6;CD59;ITGA5;CD34;IL6R
Gap junction assembly	3/19	0.95709	0.999996	0	0	0.429299	0.0188282	GJA1;GJB6;GJA9
Small ligand GPCRs	3/19	0.95709	0.999996	0	0	0.429299	0.0188282	CNR2;S1PR3;PTGDR
Starch and sucrose metabolism	11/53	0.957414	0.999996	0	0	0.599324	0.0260824	UGT2B10;GPI;UGP2;AMY1A;UXS1;AMY1C;ENPP3;GBA3;GUSB;UGT2B7;HK1
AKT phosphorylation of nuclear targets	1/9	0.961629	0.999996	0	0	0.28627	0.0112007	AKT3
HIV-induced T cell apoptosis	1/9	0.961629	0.999996	0	0	0.28627	0.0112007	CD3D
Nef-mediated CD4 downregulation	1/9	0.961629	0.999996	0	0	0.28627	0.0112007	AP2B1
Nitric oxide effects	1/9	0.961629	0.999996	0	0	0.28627	0.0112007	NOS2
Opsins	1/9	0.961629	0.999996	0	0	0.28627	0.0112007	OPN3
Prostanoid ligand receptors	1/9	0.961629	0.999996	0	0	0.28627	0.0112007	PTGDR
Sodium/proton exchangers	1/9	0.961629	0.999996	0	0	0.28627	0.0112007	SLC9A1
G alpha i pathway	25/108	0.962281	0.999996	0	0	0.688809	0.0264836	ADCY4;ITPR2;ITPR3;ADCY2;PIK3CB;GNAI1;RGS5;MAPK9;RAP1A;MAPK7;GRK5;GRK4;AKT3;MAPK1;HRAS;MAP2K6;MAP2K3;PRKCH;MAP3K1;STAT3;BRAF;KRAS;RAF1;SOS1;HBEGF
Binding of chemokines to chemokine receptors	11/54	0.964244	0.999996	0	0	0.585344	0.0213128	CCR1;CXCL11;CXCL8;CXCR1;CCL5;XCL2;CXCL3;CCR4;CCL28;CX3CL1;CXCL16
Transmission across chemical synapses	47/190	0.964493	0.999996	0	0	0.751093	0.0271543	CHRNA1;ACHE;CAMK2D;STXBP1;GRIK5;RASGRF2;RASGRF1;CAMK2A;ADCY4;ADCY2;GRIK2;COMT;CPLX1;GNAI1;GNAI2;GNG10;RRAS;GNG5;CHRNE;GNG7;RPS6KA1;MYO6;MAPK1;GLUL;SLC38A2;HRAS;CAMK2G;NSF;HSPA8;SLC38A1;PDPK1;GAD2;BRAF;AP2B1;GNG11;GNG13;DLG1;DLG4;DNAJC5;AKAP9;GNB1;GNB4;MDM2;RAF1;CALM1;PLCB1;STX1A
Complement and coagulation cascades	15/70	0.964632	0.999996	0	0	0.623916	0.0224663	C1QA;CR2;VWF;PROS1;SERPINE1;CFI;C4BPB;C8A;KNG1;THBD;F8;PROC;CD59;A2M;C1QC
G alpha q pathway	15/70	0.964632	0.999996	0	0	0.623916	0.0224663	PRKCH;PDPK1;ITPR2;ITPR3;PIK3CB;ADRA1B;PLD1;IKBKB;NFKBIA;RGS5;GRK5;GRK4;GNAQ;AKT3;ORAI1
Amine compound SLC transporters	5/29	0.965606	0.999996	0	0	0.476882	0.0166907	SLC6A6;SLC6A18;SLC6A9;SLC44A2;SLC6A2
Phototransduction	5/29	0.965606	0.999996	0	0	0.476882	0.0166907	SLC24A1;GNAT2;GNB1;ARRB2;CALM1
Extrinsic prothrombin activation pathway	2/15	0.96706	0.999996	0	0	0.352263	0.0117991	PROC;PROS1
Gene expression regulation in pancreatic beta cells	3/20	0.967243	0.999996	0	0	0.404017	0.0134561	AKT3;NKX6-1;FOXA3
O-linked glycosylation of mucins	13/63	0.969655	0.999996	0	0	0.594819	0.0183294	ST6GAL1;ST6GALNAC2;MUCL1;MUC17;GALNT18;GALNT1;C1GALT1C1;B3GNT7;GCNT6;GCNT7;ST3GAL1;MUC20;B4GALT5
O-glycan biosynthesis	5/30	0.972782	0.999996	0	0	0.457773	0.0126323	C1GALT1C1;GALNT18;GALNT1;ST3GAL1;B4GALT5
Ethanol oxidation	1/10	0.973293	0.999996	0	0	0.254444	0.00688785	ACSS2
GluR2-containing AMPA receptor trafficking	2/16	0.975748	0.999996	0	0	0.327078	0.00803008	NSF;AP2B1
Arf6 signal transduction regulation	6/35	0.975989	0.999996	0	0	0.4735	0.011508	CYTH3;GNAQ;ARAP2;ARRB2;NCK1;GULP1
NCAM1 interactions	8/44	0.977576	0.999996	0	0	0.508486	0.0115321	PRNP;COL4A2;COL6A2;COL6A1;ST8SIA4;COL4A5;AGRN;CACNA1H
Cytochrome P450 pathway	12/61	0.978787	0.999996	0	0	0.560217	0.0120115	CYP27A1;CYP39A1;CYB5B;CYB5R1;CYB5A;CYP2C9;POR;CYB5R3;CYP4X1;CYP11B2;CYP2C19;CYP3A5
Cytokine-cytokine receptor interaction	66/265	0.979793	0.999996	0	0	0.757225	0.0154582	CD40;CSF3;CSF3R;CXCL8;FLT1;IL25;CSF1;IL23R;FLT4;IFNA2;CXCL3;TNF;CX3CL1;CXCL16;TNFSF13B;KDR;TNFSF10;IL12A;CCR4;IL6R;ACVR1;IL11;IFNA13;TNFRSF12A;IFNGR2;IL13;FLT3LG;LIFR;OSMR;TNFRSF1B;TNFRSF1A;IFNG;IFNE;IL3RA;XCL2;PLEKHO2;IL6ST;CCL14;PDGFB;IL22RA2;CCL8;CXCR1;CCL5;TNFRSF17;CCL18;RELT;CCL15;IFNA21;CCR1;TGFB2;TNFSF14;TSLP;TNFSF15;TNFRSF10C;INHBB;INHBA;ACVR2A;VEGFA;BMP2;CXCL11;CD40LG;IL7;IL9;CCL28;CRLF2…
Alternative complement pathway	1/11	0.981411	0.999996	0	0	0.228983	0.00429655	C8A
CDC6 association with the ORC-origin complex	1/11	0.981411	0.999996	0	0	0.228983	0.00429655	ORC2
Passive transport by aquaporins	1/11	0.981411	0.999996	0	0	0.228983	0.00429655	AQP1
Recycling of bile acids and salts	1/11	0.981411	0.999996	0	0	0.228983	0.00429655	ABCB11
Glucuronidation	4/27	0.981774	0.999996	0	0	0.398056	0.00732173	UGT2B10;UGP2;UGT2B7;HK1
Glycosphingolipid biosynthesis: lacto and neolacto series	4/27	0.981774	0.999996	0	0	0.398056	0.00732173	B4GALT3;B4GALT1;FUT7;GCNT2
Calcium signaling pathway	42/178	0.982145	0.999996	0	0	0.70551	0.0127107	MYLK2;CAMK2D;CAMK2A;ATP2A3;HTR2B;ADCY4;ITPR2;ATP2A2;ADRB1;ITPR3;ADCY2;ADRA1B;CACNA1H;GRM1;PPP3CA;HRH1;PPP3R1;EDNRB;HRH2;ERBB4;PHKG2;PLCG2;CHP1;CD38;CAMK2G;NOS2;SPHK2;PHKB;TACR1;SLC8A3;P2RX4;GNAQ;VDAC3;GNAS;VDAC2;VDAC1;CALM1;PLCB1;SLC25A5;SLC25A4;PPID;SLC25A6
Integrin beta-5 pathway	2/17	0.982198	0.999996	0	0	0.305251	0.00548294	FN1;ITGAV
Tyrosine metabolism	7/41	0.983127	0.999996	0	0	0.471087	0.00801642	GOT1;TYRP1;GOT2;MIF;COMT;LCMT1;ADH5
Neural crest differentiation	19/91	0.984356	0.999996	0	0	0.603355	0.00951341	ITGB1;GSK3B;SMAD1;TCF7L1;RAB4B;CTBP2;HDAC1;ASCL1;HDAC8;ETS1;HDAC9;GFAP;BMP4;PAX7;ZIC1;ID1;PMP22;HES1;TCF4
Eicosanoid metabolism	3/23	0.985758	0.999996	0	0	0.34334	0.00492516	ALOX5AP;PLA2G4A;PLCB1
Nucleotide G-protein coupled receptors (GPCRs)	1/12	0.987062	0.999996	0	0	0.208151	0.00271064	LPAR6
Serotonin receptors	1/12	0.987062	0.999996	0	0	0.208151	0.00271064	HTR2B
Tandem pore domain potassium channels	1/12	0.987062	0.999996	0	0	0.208151	0.00271064	KCNK6
Striated muscle contraction	6/38	0.987959	0.999996	0	0	0.429017	0.00519699	TNNT1;MYL2;ACTN4;VIM;MYH6;ACTG1
Generic transcription pathway	95/377	0.98927	0.999996	0	0	0.7682	0.00828705	ZNF254;ZNF331;ZNF573;ZNF253;ZNF175;ZNF571;CCNT2;MAML2;ZNF492;CCNT1;MAML1;CHD9;SERPINE1;MED16;NR3C1;NR3C2;MED14;MED13;ZNF528;ZNF600;ZNF202;ZNF443;MEN1;ZNF200;ZNF442;MED1;NCOA6;ZNF160;NCOA3;ZNF12;MED27;MED6;NRBP1;MED23;NCOR2;PPM1A;MED24;TBL1XR1;MED20;RARA;ZNF559;PPARG;PGR;UBA52;ZNF114;ZNF510;ZNF398;ZNF28;ZNF274;ZNF197;ZNF394;ZNF195;HDAC1;NR1I2;ZNF3;NR2C2;ZNF708;UBB;ZKSCAN7;TGS1;ZNF506;ZNF627;MED31;…
Ion channel transport	11/61	0.990355	0.999996	0	0	0.503142	0.00487626	GLRA3;ATP8A1;GLRB;ATP8B1;ATP2A3;HTR3C;ATP2A2;ATP11B;ATP11A;ATP12A;ATP1B1
Lck and Fyn tyrosine kinases in initiation of T cell receptor activation	1/13	0.990995	0.999996	0	0	0.190792	0.00172588	CD3D
Organic anion transporters	1/13	0.990995	0.999996	0	0	0.190792	0.00172588	SLC22A7
Corticotropin releasing hormone pathway	3/25	0.991958	0.999996	0	0	0.312083	0.00252005	POMC;GJA1;CXCL8
Ligand-gated ion channel transport	3/25	0.991958	0.999996	0	0	0.312083	0.00252005	GLRA3;GLRB;HTR3C
Maturity onset diabetes of the young	3/25	0.991958	0.999996	0	0	0.312083	0.00252005	HES1;NKX6-1;FOXA3
Biological oxidations	30/139	0.992318	0.999996	0	0	0.628745	0.0048489	NNMT;ACSS2;ACSM1;MGST3;GSTP1;MGST1;MGST2;COMT;CYP2C19;CYP3A5;CNDP2;PAPSS1;UGP2;MAT2A;SULT1C4;UGT2B10;GSTM4;GGT7;GSTM1;GSTO1;SMOX;GSS;CYP27A1;CYP39A1;POMC;CYP2C9;NAT1;GSTA4;CYP11B2;UGT2B7
PAC1 receptor pathway	6/40	0.992522	0.999996	0	0	0.403723	0.00303056	PRKCH;GNAQ;ADCY4;PLCG2;ADCY2;PLCB1
Defensins	7/45	0.99316	0.999996	0	0	0.421378	0.00289203	DEFB103A;DEFA4;DEFA3;DEFB133;DEFB107A;DEFB121;DEFB132
HNF3B pathway	7/45	0.99316	0.999996	0	0	0.421378	0.00289203	FOXA1;ACADVL;CPT1A;NF1;NR3C1;HADH;FOXA3
Phospholipase C-mediated cascade	9/54	0.993171	0.999996	0	0	0.457416	0.00313456	KLB;FGF7;PRKAR1A;PRKAR2A;ADCY4;ITPR2;ADCY2;ITPR3;CALM1
Inwardly rectifying potassium channels	4/31	0.993686	0.999996	0	0	0.338987	0.00214709	GNG10;GNG5;GNG7;GNB1
Lectin-induced complement pathway	1/14	0.993732	0.999996	0	0	0.176103	0.00110724	C8A
Basal cell carcinoma	9/55	0.994498	0.999996	0	0	0.44744	0.00246877	APC2;BMP4;GSK3B;TCF7L2;TCF7L1;BMP2;APC;WNT9B;FZD8
Pancreatic beta-cell development regulation	4/32	0.995191	0.999996	0	0	0.326857	0.00157555	AKT3;HES1;NKX6-1;FOXA3
Amine ligand-binding G-protein coupled receptors	6/42	0.995408	0.999996	0	0	0.381239	0.0017546	HRH1;HRH2;TAAR6;HTR2B;ADRB1;ADRA1B
Eicosanoid ligand-binding G-protein coupled receptors	1/15	0.995637	0.999996	0	0	0.163512	0.000714907	PTGDR
Validated nuclear estrogen receptor beta network	1/15	0.995637	0.999996	0	0	0.163512	0.000714907	NCOA3
Retinol metabolism	11/65	0.995704	0.999996	0	0	0.465738	0.00200506	UGT2B10;CYP2C9;DGAT2;DGAT1;AWAT2;RDH11;CYP2C19;CYP3A5;UGT2B7;ADH5;DHRS4
Wnt/calcium/cyclic GMP pathway	13/74	0.995978	0.999996	0	0	0.48717	0.00196323	CAMK2D;PRKCH;CAMK2A;WNT9B;ITPR2;FZD8;NFATC2;ITPR3;PPP3CA;PPP3R1;PLCG2;PLCB1;CAMK2G
Hedgehog signaling pathway	12/70	0.99623	0.999996	0	0	0.47298	0.00178665	BMP4;GSK3B;CSNK1G3;BMP2;ARL13B;DHH;KIF3A;BOC;WNT9B;ARRB2;CSNK1E;CSNK1G2
GABA A and B receptor activation	8/53	0.996886	0.999996	0	0	0.406525	0.00126798	GNG10;GNG5;GNG7;GNB1;ADCY4;ADCY2;GNAI1;GNAI2
Nucleotide-like (purinergic) G-protein coupled receptors	1/16	0.996963	0.999996	0	0	0.1526	0.000464116	LPAR6
Vitamin A and carotenoid metabolism	5/39	0.997154	0.999996	0	0	0.33638	0.000958771	SCARB1;AWAT2;CRABP1;RARA;BCO2
FGFR ligand binding and activation	2/23	0.997347	0.999996	0	0	0.217942	0.00057895	KLB;FGF7
Visual signal transduction: cones	2/23	0.997347	0.999996	0	0	0.217942	0.00057895	GNAT2;RGS9BP
Metapathway biotransformation	37/174	0.997389	0.999996	0	0	0.616428	0.00161146	NNMT;NAA20;MGST3;GSTP1;MGST1;MGST2;AKR1B1;COMT;HNMT;CYP2C19;CYP3A5;NDST1;AKR7A2;CYP4X1;CHST12;SULT1C4;GSTM4;GSTK1;GSTM3;GSTM2;CHST6;GSTM1;GSTO1;AKR1C1;GSS;AKR1A1;AKR1C3;AKR1C2;CYP27A1;CYP39A1;CYP2C9;NAT1;GSTA4;CYP11B2;SULT6B1;CHST2;UGT2B7
Class B GPCRs (secretin family receptors)	17/95	0.998105	0.999996	0	0	0.497937	0.000944669	RAMP2;CALCRL;RAMP3;DHH;PTH;WNT9B;FZD8;GNG11;GNG13;GNG10;GNG5;GNG7;GHRH;GNB1;GNAS;GNB4;RAMP1
Immunoregulatory interactions between a lymphoid and a non-lymphoid cell	22/119	0.998892	0.999996	0	0	0.517885	0.000574251	ITGB1;IFITM1;CD40;CD81;ICAM2;HLA-B;HLA-A;HLA-F;HLA-G;CD3D;KIR2DL4;ICAM1;HLA-E;CD40LG;B2M;ULBP1;CD34;PVRL2;CD200;MICA;ULBP3;MICB
Hypothetical network for drug addiction	3/32	0.998991	0.999996	0	0	0.236633	0.000238935	KRIT1;MAPK1;GRM1
Interleukin-9 regulation of target genes	2/026	0.998998	0.999996	0	0	0.190658	0.000191047	SCIN;IL13
Voltage-gated potassium channels	5/43	0.999025	0.999996	0	0	0.300885	0.000293575	KCNV1;KCNB1;KCNH7;KCNC3;KCNA4
Adrenergic pathway	26/137	0.99913	0.999996	0	0	0.534663	0.000465386	ADCY4;ITPR2;AKR1B1;ITPR3;ADCY2;PIK3CB;GNAI1;RGS5;MAPK9;MAPK7;GRK5;GRK4;AKT3;PLCG2;MAPK1;HRAS;PRKCH;PDE2A;PDE4C;BRAF;GNAQ;PDE3A;KRAS;PDE7B;RAF1;PLCB1
G alpha s pathway	21/120	0.999573	0.999996	0	0	0.484208	0.000206954	MAP2K3;MAP3K1;PDE2A;PDE4C;ADCY4;BRAF;PHKB;ADCY2;RGS5;MAPK9;RAP1A;MAPK7;GRK5;GRK4;PHKG2;PDE3A;MAPK1;PDE7B;RAF1;RAPGEF5;MAP2K6
Signal transduction	263/1020	0.999602	0.999996	0	0	0.786754	0.000313338	ATF1;APP;MAML2;MAML1;ICAM2;F11R;OR4Q2;ICAM1;EDNRB;GNAT2;AKT3;CHEK1;KDR;ATP6V1E1;CER1;MEF2A;ATP6V1G1;ATP6V0E1;FRS2;OR4P4;NGFRAP1;CDC37;OR2AT4;OR4C12;DHH;OR10T2;FPR3;MTMR4;HIF1A;APH1A;ABR;GNG10;APH1B;GALR2;ATP6V0A4;A2M;ATP6V1C1;CCR1;CREBBP;JUN;JAG1;INSR;FN1;OR2J1;FZD8;BRAF;CGN;GNG11;GNG13;MC1R;AGO4;LPAR6;NMS;AGO2;GRAP;CALM1;NRP1;NRP2;CDKN1A;CAB39L;CLTC;ARHGAP1;ARHGAP5;AATF;CX3CL1;IKBKB;AKAP13;HEY1;…
Phase I of biological oxidations: functionalization of compounds	9/69	0.999786	0.999996	0	0	0.342691	7.33979e-05	CYP27A1;CYP39A1;POMC;CYP2C9;ACSS2;SMOX;CYP11B2;CYP2C19;CYP3A5
G alpha (i) signaling events	39/199	0.999793	0.999996	0	0	0.555603	0.000115139	APP;GNAZ;CXCL8;ADCY4;FPR3;ADCY2;CXCL3;GNAI1;KNG1;GNAI2;CXCL16;HEBP1;HCAR3;GNG10;GNAT2;CXCR1;NPW;CNR2;GNG5;GALR2;NPY;CCL5;GNG7;S1PR3;CCR4;CCR1;CASR;ANXA1;OPN3;GNG11;GNG13;POMC;CXCL11;NMS;GNB1;SAA1;GNAS;GNB4;CCL28
Neuronal system	60/283	0.999808	0.999996	0	0	0.612614	0.000117544	ACHE;KCNK6;GRIK5;KCNC3;RASGRF2;RASGRF1;GRIK2;COMT;RPS6KA1;GLUL;HRAS;NSF;SLC38A1;KCNH7;PDPK1;STX8;STX7;DNAJC5;AKAP9;VAMP1;PLCB1;RAF1;STX1A;CHRNA1;HCN4;CAMK2D;STXBP1;CAMK2A;ADCY4;KCNA4;ADCY2;CPLX1;GNAI1;GNAI2;STX10;KCNV1;GNG10;RRAS;GNG5;CHRNE;GNG7;MYO6;MAPK1;STX4;STX2;SLC38A2;CAMK2G;HSPA8;KCNB1;GAD2;BRAF;AP2B1;GNG11;GNG13;DLG1;DLG4;GNB1;GNB4;MDM2;CALM1
Peptide G-protein coupled receptors	34/192	0.999975	0.999996	0	0	0.490169	1.22207e-05	APP;CXCL8;ATP8A1;FPR3;CXCL3;KNG1;CX3CL1;CXCL16;HEBP1;EDNRB;CXCR1;NPW;GALR2;CCL5;NPY;TAC4;GAST;QRFPR;CCR4;PROK1;CCR1;EDN1;ANXA1;TACR1;HCRTR1;POMC;MC3R;CXCL11;MC1R;NMS;XCL2;SAA1;F2RL1;CCL28
Signaling by GPCR	180/977	0.999992	0.999996	0	0	0.502708	4.06983e-06	DGKG;APP;OR8I2;OR9K2;OR1C1;TRIO;DGKD;DGKA;OR4Q2;CXCL16;PREX1;OR1S2;OR5H14;EDNRB;GNAT2;PPP2R1B;PPP2R1A;AKT3;RPS6KA1;PROK1;OR5D14;PTGDR;OR8H2;CASR;PRKCH;TAAR6;OR4P4;TIAM2;OR2T1;OBSCN;PRKAR1A;DGKQ;OR2AT4;OR4C12;RAF1;DGKH;GNAZ;OR1A1;CALCRL;DHH;ITPR2;OR10T2;FPR3;PIK3R2;ITPR3;ADRB1;PIK3R1;KNG1;HCAR3;ABR;OR5M10;PPP3R1;GNG10;HRH1;GRK5;GALR2;HRH2;PRKAR2A;OR4A47;OR7D2;CCR1;OR10K2;OPN3;PDE2A;OR2J1;FZD8;GNG1…
Olfactory transduction	51/432	0.999993	0.999996	0	0	0.300815	1.99873e-06	OR8I2;OR9K2;OR1C1;OR8U8;OR4M2;ARRB2;OR4Q2;OR8U1;OR1S2;OR5H14;OR13D1;OR5D14;OR52B6;OR8H2;OR4D2;OR4P4;OR2T1;OR2AT4;OR4C12;OR2B11;OR52A1;OR4C6;OR1A1;CAMK2D;OR2G3;OR13J1;CAMK2A;OR4K1;OR10T2;OR8S1;OR4S1;OR5M10;OR2W3;OR8B8;OR4A47;OR7D2;CAMK2G;OR10K2;OR2F2;OR51M1;OR5L1;OR2J1;OR5T3;OR5T1;OR6V1;GNB1;OR11A1;OR8A1;OR51A2;CALM1;OR7G3
GPCR ligand binding	68/410	0.999993	0.999996	0	0	0.449379	2.94581e-06	APP;CXCL8;HTR2B;ADRA1B;CXCL3;CX3CL1;GRM1;CXCL16;HEBP1;EDNRB;GRM4;GAST;QRFPR;CCR4;PROK1;TSHB;PTGDR;EDN1;CASR;ANXA1;TAAR6;FSHB;WNT9B;GPBAR1;TACR1;MC3R;XCL2;RAMP2;CALCRL;RAMP3;DHH;PTH;FPR3;ADRB1;KNG1;HCAR3;GNG10;HRH1;CXCR1;NPW;CNR2;GNG5;GALR2;HRH2;CCL5;NPY;GNG7;S1PR3;TAS1R3;CCR1;OPN3;FZD8;GNG11;HCRTR1;GNG13;POMC;CXCL11;MC1R;LPAR6;NMS;GHRH;GNB1;SAA1;GNAS;GNB4;F2RL1;CCL28;RAMP1
Neuroactive ligand-receptor interaction	39/272	0.999994	0.999996	0	0	0.379506	2.2293e-06	CHRNA1;PRSS1;CALCRL;GRIK5;HTR2B;FPR3;ADRB1;GRIK2;NR3C1;ADRA1B;GRM1;HRH1;EDNRB;GLRA3;GRM4;CNR2;GALR2;HRH2;CHRNE;TSPO;CHRNA10;S1PR3;TSHB;PTGDR;CHRNB1;GRID2;GRID1;TAAR6;FSHB;TACR1;TRPV1;HCRTR1;MC3R;MC1R;P2RX4;GLRB;LPAR6;PARD3;F2RL1
Class A GPCRs (rhodopsin-like)	28/253	0.999994	0.999996	0	0	0.281805	1.62247e-06	OR1A1;GPR25;OR1C1;HTR2B;FPR3;ADRB1;ADRA1B;HCAR3;HRH1;EDNRB;CXCR1;CNR2;OR8B8;GALR2;HRH2;CCR4;PTGDR;CCR1;OPN3;OR2F2;GPR1;HCRTR1;MC3R;OR2T1;LPAR6;GPR161;F2RL1;OR11A1
Potassium channels	11/99	0.999994	0.999996	0	0	0.285093	1.61667e-06	HCN4;KCNV1;KCNK6;GNG10;GNG5;KCNH7;KCNB1;KCNC3;GNG7;GNB1;KCNA4
Complement cascade	6/77	0.999996	0.999996	0	0	0.192817	8.24822e-07	C1QA;PROS1;CFI;C4BPB;C8A;C1QC
Non-class A, B, C GPCRs	2/86	0.999996	0.999996	0	0	0.0542387	2.25281e-07	CXCR1;GRM1

## Sheet: KEGG
Term	Overlap	P-value	Adjusted P-value	Old P-value	Old Adjusted P-value	Odds Ratio	Combined Score	Genes
Ribosome	109/158	1.34224e-23	4.28175e-21	0	0	5.17134	272.349	RPL5;RPL30;RPL3;RPL32;RPL31;RPL34;RPL10A;RPL8;RPL9;RPL6;RPL7;RPS15;RPS17;RPS16;RPL18A;RPS19;RPL36AL;RPS18;RPL35;RPL38;RPL37;RPS10;RPS13;RPS12;RPS9;RPL21;RPL36A-HNRNPH2;RPS7;RPS8;RPL23;RPL22;RPS6;RPSA;MRPS18C;RPL24;RPL27;RPL26;RPL29;RPL28;UBA52;RPS4Y2;MRPL18;MRPL19;MRPL17;MRPL14;MRPL13;MRPL10;MRPL11;MRPL20;RPL41;MRPL27;MRPL24;MRPL21;MRPL22;RPS26;RPS25;RPS28;RPS27;RPS29;RPL27A;RPS20;RPS21;RSL24D1;R…
Amyotrophic lateral sclerosis	200/364	8.50814e-23	1.35705e-20	0	0	2.85507	145.09	NUP107;ACTB;GLE1;PSMD8;PSMD9;PSMD6;PSMD7;PSMD4;PSMD3;GABARAPL2;ATG14;NUP93;COX7A2L;UQCRC1;ULK2;VDAC1;NUP98;UQCRC2;PFN1;ATF4;PFN2;NUP205;POM121;SEH1L;PPP3R1;POM121C;NUP85;COX2;NUP88;NRBF2;XBP1;EIF2AK3;SETX;ATG2A;COX7B;COX7C;PPP3CA;TUBA1C;ACTR1A;TUBA1B;CASP12;TUBA1A;ANXA7;RAC1;RAB8A;COX8A;SEC13;TUBB;PSMA6;PSMA4;TUBB2A;PSMA1;PSMA2;TOMM40;DERL1;UQCR11;UQCR10;COX5B;COX5A;TANK;PSMB6;PSMB7;PSMB4;PSMB5;P…
Parkinson disease	141/249	5.36591e-18	5.42313e-16	0	0	3.03845	120.828	NDUFA11;NDUFA12;NDUFA10;UBE2L6;PARK7;COX6A1;NDUFC2-KCTD14;TXN2;PSMD8;TUBB8;PSMD9;PSMD6;TUBB6;PSMD7;PSMD4;TUBB3;KIF5B;PSMD3;SDHD;SDHB;TUBA4A;COX6B1;COX7A2L;UQCRC1;VDAC3;PPIF;VDAC2;VDAC1;UQCRC2;ND3;UBA52;ATF4;ND6;PSMD12;PSMD11;NDUFB10;PSMD14;UBA7;UQCRB;NDUFB11;PSMD13;HTRA2;ITPR2;COX7A2;ITPR3;TXN;KLC1;COX7A1;UQCRH;KLC2;UBB;UBC;COX2;CYC1;NDUFV3;NDUFV2;NDUFV1;TRAP1;XBP1;EIF2AK3;UQCRQ;GNAS;CYCS;UBA1;CA…
Prion disease	151/273	6.80016e-18	5.42313e-16	0	0	2.88248	113.943	ATF2;NDUFA11;NDUFA12;NDUFA10;COX6A1;NDUFC2-KCTD14;TNF;PSMD8;TUBB8;PSMD9;PSMD6;TUBB6;PSMD7;PSMD4;TUBB3;KIF5B;PSMD3;CSNK2A1;CSNK2A2;CYBA;SDHD;SDHB;TUBA4A;COX6B1;COX7A2L;CSNK2B;UQCRC1;VDAC3;PPIF;VDAC2;VDAC1;UQCRC2;ND3;ATF4;ND6;PSMD12;PSMD11;NDUFB10;PSMD14;UQCRB;NDUFB11;PSMD13;ITPR2;PIK3R2;COX7A2;ITPR3;PIK3R1;KLC1;COX7A1;UQCRH;STIP1;PPP3R1;KLC2;COX2;CYC1;NDUFV3;NDUFV2;NDUFV1;HSPA8;PRNP;EIF2AK3;HSPA2;…
Huntington disease	158/306	4.8563e-15	2.97953e-13	0	0	2.4845	81.8853	NDUFA11;NDUFA12;NDUFA10;COX6A1;NDUFC2-KCTD14;PSMD8;TUBB8;PSMD9;PSMD6;TUBB6;PSMD7;PSMD4;TUBB3;KIF5B;PSMD3;EP300;TGM2;SDHD;ATG14;SDHB;TUBA4A;COX6B1;COX7A2L;UQCRC1;VDAC3;PPIF;ULK2;VDAC2;VDAC1;UQCRC2;ND3;STX1A;ND6;PSMD12;PSMD11;NDUFB10;PSMD14;UQCRB;NDUFB11;PSMD13;COX7A2;KLC1;COX7A1;UQCRH;KLC2;COX2;NRBF2;CYC1;NDUFV3;MAP2K7;NDUFV2;NDUFV1;CREBBP;DLG4;UQCRQ;GNAQ;ATG2A;CYCS;RCOR1;DNAL1;TUBA8;COX7B;COX4I1;…
Alzheimer disease	183/369	5.60414e-15	2.97953e-13	0	0	2.29308	75.2482	APP;CSF1;NDUFA11;NDUFA12;NDUFA10;ARAF;IRS2;COX6A1;NDUFC2-KCTD14;TNF;PSMD8;TUBB8;PSMD9;PSMD6;TUBB6;PSMD7;PSMD4;TUBB3;KIF5B;AKT3;PSMD3;CAPN1;CSNK2A1;CSNK2A2;CSNK1E;SDHD;ATG14;SDHB;TUBA4A;COX6B1;COX7A2L;ADAM17;CSNK2B;UQCRC1;VDAC3;PPIF;ULK2;VDAC2;VDAC1;UQCRC2;ND3;RAF1;PPID;ATF4;ND6;PSMD12;PSMD11;NDUFB10;PSMD14;UQCRB;NDUFB11;PSMD13;ITPR2;PIK3R2;COX7A2;ITPR3;PIK3R1;PSEN1;KLC1;COX7A1;RTN4;UQCRH;APH1A;PP…
Non-alcoholic fatty liver disease	92/155	6.75335e-14	3.0776e-12	0	0	3.38179	102.557	GSK3B;COX7B;GSK3A;CXCL8;NDUFA11;NDUFA12;COX4I1;NDUFA10;PRKAG1;IRS2;PIK3CB;COX6A1;NDUFC2-KCTD14;TNF;COX7C;IKBKB;CASP3;AKT3;UQCRFS1;RAC1;IL6R;COX8A;SREBF1;PRKAB2;NDUFC2;NDUFC1;SDHD;SDHB;COX6B1;TNFRSF1A;COX7A2L;NDUFS8;NDUFS7;PIK3CA;NDUFS6;NDUFS5;NDUFS4;UQCRC1;NDUFS2;PPARG;UQCRC2;ATF4;NDUFB9;NDUFB8;PRKAA1;NDUFB7;NDUFB10;UQCRB;NDUFB6;NDUFB11;NDUFB5;NDUFB4;NDUFB3;NDUFB2;NDUFB1;COX7A2;PIK3R2;UQCR11;PIK3…
Coronavirus disease	124/232	1.71702e-13	6.84661e-12	0	0	2.66448	78.3172	RPL5;RPL30;CSF3;RPL3;RPL32;RPL31;RPL34;RPL8;RPL10A;RPL9;TNF;RPL6;RPL7;RPS15;RPS17;RPS16;RPL18A;RPS19;RPL36AL;RPS18;RPL35;IL12A;RPL38;RPL37;RPS10;IL6R;MAP3K7;RPS13;RPS12;IFNA13;RPS9;RPL21;RPL36A-HNRNPH2;RPS7;RPS8;RPL23;RPL22;RPS6;RPSA;ADAM17;RPL24;RPL27;RPL26;RPL29;IL6ST;RPL28;UBA52;RPS4Y2;PIK3R2;PIK3R1;PLCG2;IFNA21;JUN;RPL41;EIF2AK2;ISG15;RPS26;NFKBIA;RPS25;RPS28;MAVS;RPS27;RPS29;RPL27A;RPS20;TAB…
Pathways of neurodegeneration	216/475	1.8442e-12	6.53665e-11	0	0	1.94429	52.5326	APP;ARAF;UBE2L6;PSMD8;PSMD9;PSMD6;PSMD7;PSMD4;PSMD3;GABARAPL2;CSNK2A1;CSNK2A2;CSNK1E;ATG14;COX7A2L;CSNK2B;UQCRC1;VDAC3;ULK2;VDAC2;VDAC1;UQCRC2;UBA52;STX1A;ATF4;PPP3R1;COX2;NRBF2;FADD;TRAP1;XBP1;EIF2AK3;FZD8;BRAF;ATG2A;CALM1;NOX1;COX7B;COX7C;TUBA1C;PPP3CA;TUBA1B;ACTR1A;UCHL1;CASP12;TUBA1A;RAC1;HRAS;RAB8A;APC2;COX8A;TUBB;WNT9B;PSMA6;PSMA4;TUBB2A;PSMA1;PSMA2;PLCB1;TOMM40;DERL1;UQCR11;UQCR10;COX5B;TA…
Oxidative phosphorylation	73/133	3.38491e-09	1.07979e-07	0	0	2.80924	54.7912	COX7B;NDUFA11;NDUFA12;COX4I1;NDUFA10;TCIRG1;ATP12A;COX6A1;NDUFC2-KCTD14;COX7C;UQCRFS1;ATP6V1E1;COX8A;ATP6V1G1;ATP6V0B;ATP6V0E1;ATP6AP1;NDUFC2;NDUFC1;SDHD;SDHB;COX6B1;COX7A2L;NDUFS8;NDUFS7;NDUFS6;NDUFS5;NDUFS4;UQCRC1;NDUFS2;UQCRC2;ND3;ATP6V1A;ND6;NDUFB9;NDUFB8;NDUFB7;NDUFB10;UQCRB;NDUFB6;NDUFB11;NDUFB5;NDUFB4;COX17;NDUFB3;NDUFB2;NDUFB1;COX7A2;UQCR11;UQCR10;COX5B;COX7A1;COX5A;UQCRH;COX2;ATP6V0A4;CY…
Proteasome	33/46	8.91026e-09	2.58398e-07	0	0	5.84216	108.291	PSMD12;PSMD11;PSMD14;PSMD13;POMP;PSMB10;PSMB6;PSMD8;PSMB7;PSMD9;PSMB4;PSMD6;PSMB5;PSMD7;PSMB2;PSMD4;PSMB3;PSMB1;PSMD3;ADRM1;PSMB8;PSMB9;PSMA6;PSMC5;PSMA4;PSMC6;IFNG;PSMA1;PSMA2;PSMC4;PSMC1;PSMC2;PSME1
Diabetic cardiomyopathy	99/203	2.74994e-08	7.31027e-07	0	0	2.20051	38.3088	NDUFA11;NDUFA12;NDUFA10;COX6A1;NDUFC2-KCTD14;PPP1CB;MPC1;MPC2;AKT3;PDK3;PDK2;G6PD;CYBA;SDHD;SDHB;COX6B1;COX7A2L;UQCRC1;VDAC3;PPIF;VDAC2;VDAC1;UQCRC2;ND3;ND6;NDUFB10;UQCRB;NDUFB11;PIK3R2;COX7A2;PIK3R1;COX7A1;UQCRH;COX2;CYC1;NDUFV3;NDUFV2;NDUFV1;TGFB2;PDHA1;SMAD3;INSR;UQCRQ;GSK3B;COX7B;COX4I1;ATP2A3;PTEN;ATP2A2;PIK3CB;COX7C;RAC2;UQCRFS1;RAC1;COX8A;NDUFC2;NDUFC1;NDUFS8;NDUFS7;PIK3CA;NDUFS6;NDUFS5;ND…
Thermogenesis	109/232	6.9864e-08	1.71435e-06	0	0	2.04914	33.7631	KLB;ATF2;NDUFA11;NDUFA12;NDUFA10;COX6A1;NDUFC2-KCTD14;ACTB;ACTG1;NPPB;DPF1;RPS6KA1;MAP2K3;CPT1A;PRKAB2;SMARCC1;SMARCC2;RPS6;ACSL5;FRS2;TSC1;ACSL3;SDHD;SDHB;COX6B1;COX7A2L;UQCRC1;UQCRC2;ND3;ND6;COX16;NDUFB10;UQCRB;NDUFB11;COX17;COX7A2;COX7A1;UQCRH;COX2;CYC1;NDUFV3;NDUFV2;NDUFV1;COA3;COA1;NDUFAF6;NDUFAF7;RHEB;UQCRQ;NDUFAF4;GNAS;NDUFAF3;NDUFAF1;COX7B;COX4I1;PRKAG1;COX7C;MLST8;UQCRFS1;HRAS;COA7;COA6;…
RNA transport	90/186	1.81395e-07	4.13323e-06	0	0	2.16516	33.6089	CYFIP2;EIF4A2;CYFIP1;EIF4A1;POP5;NUP107;POP7;NUP188;FMR1;POP4;RPP30;PHAX;NXT2;GLE1;XPO1;SUMO3;MAGOH;EIF3CL;EIF2B1;RPP38;EIF5B;UPF1;SEC13;ELAC2;PABPC4;PABPC5;THOC3;THOC2;SENP2;RPP25L;THOC7;SRRM1;THOC6;NUP93;NUP50;EEF1A2;GEMIN4;RPP21;GEMIN5;NUP54;GEMIN7;NUP98;PABPC1;EIF1B;NUP205;POM121;SEH1L;RBM8A;NMD3;NUP160;FXR1;POM121C;NUP85;TGS1;TPR;SMN2;EIF4EBP3;NUP88;SMN1;RPP14;RAE1;RANBP2;EIF2B4;EIF2B3;EIF2B…
Epstein-Barr virus infection	96/202	2.10873e-07	4.48456e-06	0	0	2.09221	32.1615	RB1;CD40;CDKN1A;IFNA2;PIK3CB;CD3D;TNF;ICAM1;PSMD8;IKBKB;CASP9;PSMD6;PSMD7;CCND2;PSMD4;CCND1;CASP3;AKT3;PSMD3;RAC1;POLK;SKP2;B2M;MAP3K7;HLA-DPA1;MAP2K3;PDIA3;IFNA13;USP7;CR2;DDX58;HLA-B;TAP2;HLA-A;IRAK4;HLA-F;HLA-G;HLA-E;DDB2;TAPBP;NCOR2;CCNA2;CCNA1;OAS1;PIK3CA;CCNE1;OAS2;IRF9;HLA-DQB1;RBPJL;PSMD12;PSMD11;PSMD14;PSMD13;HDAC1;PIK3R2;PIK3R1;RELA;RELB;MAPK9;HLA-DMA;HLA-DMB;PLCG2;RIPK1;HES1;FADD;CD58;…
Lysosome	66/128	4.33136e-07	8.63565e-06	0	0	2.45471	35.9669	HEXB;CLTC;HEXA;AP4E1;TCIRG1;LIPA;CTSS;SGSH;LAPTM4B;CTSO;NAGLU;CTSL;HYAL2;HYAL3;AP1S2;AP1S1;CTSH;ACP2;AP3S2;AP3S1;GUSB;CTSC;HGSNAT;ATP6V0B;MANBA;ATP6AP1;ENTPD4;AP1B1;AP3B2;SUMF1;PLA2G15;NPC2;DNASE2;CD63;ASAH1;IDUA;CLN5;GGA2;AP3M1;NEU1;ATP6V0A4;AGA;AP1M1;CTSA;ABCA2;CD164;NAPSA;SORT1;FUCA1;FUCA2;AP3D1;LAPTM5;CTNS;NAGA;MCOLN1;AP4B1;IGF2R;GALC;GNPTG;PPT1;MAN2B1;TPP1;PPT2;CD68;GLA;LGMN
Cellular senescence	76/156	1.13402e-06	2.12795e-05	0	0	2.19144	30.0003	RB1;CDKN1A;CXCL8;SERPINE1;PTEN;PIK3CB;FOXM1;ETS1;PPP1CB;PPP3CA;CCND2;CCND1;AKT3;CHEK1;MYBL2;CAPN1;HRAS;MAP2K3;HLA-B;RRAS2;TSC1;HLA-A;HLA-F;HLA-G;SIRT1;HLA-E;CCNA2;CCNA1;PIK3CA;CCNE1;MAPKAPK2;VDAC3;VDAC2;VDAC1;RAF1;SLC25A5;SQSTM1;SLC25A4;PPID;SLC25A6;ITPR2;ITPR3;PIK3R2;PIK3R1;KIR2DL4;ZFP36L2;RELA;CCNB2;CCNB1;PPP3R1;RRAS;MAPK1;TRPM7;MAP2K6;TGFB2;SMAD3;GADD45B;GADD45A;CDKN2A;NFATC2;HIPK1;HIPK3;MTOR;…
Protein processing in endoplasmic reticulum	81/171	2.13247e-06	3.77921e-05	0	0	2.07633	27.1132	ERO1A;HSP90AB1;TUSC3;UBXN2A;PRKCSH;NGLY1;HERPUD1;CASP12;MAN1A2;SEC61G;UBXN8;CAPN1;SEC61B;SIL1;SEC63;SKP1;PDIA3;SEC13;SSR4;SSR2;SSR3;MOGS;UBE4B;YOD1;RAD23B;DDOST;RBX1;DNAJC3;DAD1;DNAJC5;CANX;ERP29;PLAA;PREB;ATF4;VCP;RPN2;SAR1B;SEL1L;CUL1;DERL1;DERL2;RRBP1;RNF5;HSP90B1;LMAN1;MAPK9;GANAB;LMAN2;UBQLN1;SSR1;MAP2K7;UGGT2;SEC23B;UBQLN4;UGGT1;SEC31A;TXNDC5;EDEM3;HSPA8;XBP1;SEC24B;SEC24A;WFS1;AMFR;EDEM2;E…
Salmonella infection	110/249	2.68045e-06	4.50033e-05	0	0	1.82809	23.4535	CYFIP2;CYFIP1;GCC2;TNF;ACTB;ACTG1;TXN2;PYCARD;TUBB8;TUBB6;TUBB3;KIF5B;AKT3;TNFSF10;KPNA4;MAP3K7;SKP1;KPNA1;MAP2K3;TUBA4A;DYNC1LI2;MYL2;PFN1;RAF1;ARL8A;PFN2;ARL8B;LY96;TXN;KLC1;MYL12A;MYL12B;HSP90B1;KLC2;RRAS;PODXL;MYO6;MYL10;SNX9;RIPK1;FADD;MAP2K7;S100A10;VPS16;MAP2K6;GSDMD;JUN;MLKL;ARPC4;NFKBIA;ARPC3;CYCS;PLEKHM2;TAB2;DYNLRB1;ACBD3;RAB5A;MYD88;TUBA8;CXCL8;HSP90AB1;ARPC1B;BRK1;PIK3C2G;WASL;PIK3CB…
Adherens junction	39/71	1.42889e-05	0.000227908	0	0	2.80385	31.2798	CTNND1;PTPRM;WASL;IQGAP1;ACTB;PTPRF;ACTG1;CDC42;RAC2;CTNNA1;EP300;RAC3;MAPK1;RAC1;ACP1;MAP3K7;WASF2;WASF3;FARP2;PTPN1;TCF7L2;CREBBP;SMAD4;TCF7L1;SMAD3;YES1;CSNK2A1;INSR;CSNK2A2;LMO7;ACTN4;SORBS1;BAIAP2;RHOA;TJP1;FER;PTPRB;PARD3;CSNK2B
Pancreatic cancer	41/76	1.56261e-05	0.000237368	0	0	2.69529	29.8277	RB1;CDKN1A;RALA;ARAF;TGFA;PIK3R2;PIK3CB;PIK3R1;PLD1;RELA;CASP9;IKBKB;CDC42;MAPK9;CCND1;AKT3;RAC2;RAC3;MAPK1;POLK;RAC1;SMAD4;TGFB2;SMAD3;GADD45B;BAD;CDKN2A;GADD45A;STAT1;STAT3;BRAF;MTOR;DDB2;GADD45G;VEGFA;RAD51;PIK3CA;RPS6KB1;CDK4;KRAS;RAF1
Spinocerebellar ataxia	65/143	9.95806e-05	0.00144392	0	0	1.91908	17.6834	GTF2B;KCNC3;ATP2A3;ATP2A2;PIK3CB;VLDLR;GRM1;PSMD8;PSMD9;PSMD6;PSMD7;PSMD4;RB1CC1;AKT3;PSMD3;WIPI1;ATG14;PSMA6;PSMA4;PIK3CA;PSMA1;PSMA2;MYOD1;PPIF;VDAC3;ULK2;VDAC2;VDAC1;PLCB1;SLC25A5;SLC25A4;SLC25A6;RBPJL;PSMD12;PSMD11;PSMD14;PSMD13;ITPR2;ITPR3;PIK3R2;PIK3R1;PSMB6;MAPK9;PSMB7;PSMB4;PSMB5;RELN;PSMB2;PSMB3;PSMB1;NRBF2;NOP56;XBP1;ADRM1;MTOR;PUM2;PSMC5;PSMC6;PSMC4;GNAQ;PSMC1;PSMC2;ATG2A;CYCS;MCU
Colorectal cancer	43/86	0.00010715	0.00148612	0	0	2.3003	21.0277	GSK3B;CDKN1A;RALA;ARAF;TGFA;PIK3R2;PIK3CB;PIK3R1;CASP9;MAPK9;CCND1;CASP3;AKT3;RAC2;RAC3;MAPK1;POLK;RAC1;HRAS;APC2;TCF7L2;JUN;SMAD4;TCF7L1;TGFB2;SMAD3;GADD45B;DCC;BAD;GADD45A;BRAF;RHOA;MTOR;DDB2;GADD45G;PIK3CA;APC;RPS6KB1;BIRC5;CYCS;KRAS;RAF1;SOS1
Renal cell carcinoma	36/69	0.000126767	0.00166872	0	0	2.50831	22.5075	CDKN1A;FH;CUL2;ARAF;PDGFB;TGFA;PIK3R2;PIK3CB;PIK3R1;ETS1;HIF1A;CDC42;FLCN;RAP1A;AKT3;EP300;MAPK1;RAC1;HRAS;PAK2;EGLN1;ARNT2;CREBBP;JUN;TGFB2;EGLN2;BAD;BRAF;PTPN11;RBX1;VEGFA;PIK3CA;KRAS;RAF1;SOS1;CRK
Kaposi sarcoma-associated herpesvirus infection	83/193	0.000131732	0.00166872	0	0	1.73883	15.536	RB1;GSK3B;CDKN1A;CXCL8;IFNA2;PIK3CB;CXCL3;ICAM1;IKBKB;CASP9;PREX1;PPP3CA;CCND1;CASP3;AKT3;EP300;RAC1;CCR4;HRAS;GABARAPL2;IFNA13;HLA-B;HLA-A;ATG14;HLA-F;TICAM1;HLA-G;HLA-E;TNFRSF1A;PIK3CA;MAPKAPK2;IL6ST;RAF1;UBA52;IRF9;PDGFB;ITPR2;PIK3R2;ITPR3;PIK3R1;HIF1A;RELA;MAPK9;GNG10;PPP3R1;UBB;GNG5;GNG7;UBC;PLCG2;MAPK1;FADD;BID;RPS27A;MAP2K7;MICA;MICB;IFNA21;MAP2K6;CCR1;TCF7L2;CREBBP;JUN;TCF7L1;ANGPT2;STAT1…
Fluid shear stress and atherosclerosis	63/139	0.00013983	0.00166872	0	0	1.90862	16.9392	HSP90AB1;KEAP1;PIK3CB;TNF;ACTB;ACTG1;ICAM1;TXN2;IKBKB;NPPC;THBD;CTSL;SUMO3;AKT3;KDR;RAC2;RAC3;ITGAV;RAC1;MAP3K7;ACVR1;MEF2A;PIAS4;EDN1;DUSP1;GSTO1;CYBA;RHOA;TNFRSF1A;IFNG;PIK3CA;ARHGEF2;SQSTM1;PRKAA1;MGST3;GSTP1;MGST1;PDGFB;MGST2;PIK3R2;PIK3R1;TXN;RELA;HSP90B1;MAPK9;MAPK7;MAP2K7;MAP2K6;GSTM4;GSTM3;NQO1;GSTM2;JUN;GSTM1;SELE;PTK2;ACVR2A;VEGFA;BMP4;GSTA4;TRPV4;CALM1;NOX1
N-Glycan biosynthesis	28/50	0.000144956	0.00166872	0	0	2.92481	25.8526	DPAGT1;B4GALT3;B4GALT1;RPN2;TUSC3;GANAB;MAN2A2;MAN1A2;MAN2A1;MGAT1;ST6GAL1;ST6GAL2;ALG5;SRD5A3;ALG14;ALG2;ALG13;ALG3;MOGS;ALG1;ALG10;DDOST;DPM1;DPM2;MGAT4D;DPM3;DAD1;STT3B
Endocytosis	104/252	0.00014658	0.00166872	0	0	1.62058	14.3064	VPS29;ZFYVE9;WIPF2;CBLB;KIF5B;VPS35;SH3GL1;SH3GLB1;IST1;HLA-B;HLA-A;HLA-F;HLA-G;HLA-E;RNF41;RUFY1;HGS;PARD3;RUFY2;CHMP4C;CHMP4B;VPS25;VPS28;AGAP3;PLD1;SNX3;SNX1;GRK5;GRK4;PIP5K1C;RAB11FIP2;SNX5;HSPA8;RAB4A;SMAD3;SMURF2;VTA1;IQSEC3;ARPC4;HSPA2;IGF2R;EHD2;EHD3;DAB2;EHD4;ARPC3;CHMP2B;CHMP2A;MDM2;RAB5A;ARF3;ARF4;SH3KBP1;ARPC1B;CLTC;SNX12;WASL;ARRB2;EEA1;CAPZB;LDLRAP1;HRAS;RAB8A;PSD;ACTR2;PDCD6IP;ARAP…
Apoptosis	64/142	0.000151702	0.00166872	0	0	1.88924	16.6132	PIK3CB;TNF;ACTB;CTSS;ACTG1;TP53AIP1;CASP9;IKBKB;TUBA1C;CTSO;TUBA1B;CASP12;TUBA1A;CASP6;CTSL;CASP3;AKT3;TNFSF10;CTSH;CAPN1;HRAS;CTSC;DFFA;PARP3;ENDOG;PARP4;PDPK1;TRAF1;TUBA4A;TNFRSF1A;PIK3CA;IL3RA;BIRC5;BIRC6;RAF1;ATF4;BIRC3;HTRA2;ITPR2;XIAP;ITPR3;PIK3R2;PIK3R1;RELA;MAPK9;LMNA;MAPK1;RIPK1;FADD;BID;NTRK1;JUN;GADD45B;GADD45A;BAD;EIF2AK3;DAB2IP;SEPTIN4;GADD45G;NFKBIA;CYCS;ATM;KRAS;TUBA8
Cell cycle	57/124	0.000179387	0.0018477	0	0	1.95813	16.8908	RB1;GSK3B;CDKN1A;MCM7;SMC3;CDC20;CCND2;CDC23;CCND1;PTTG1;CDC26;CDC27;CHEK1;EP300;SKP2;SKP1;YWHAH;CDC25C;SMC1A;RBX1;CCNA2;CCNA1;CCNE1;MCM3;MCM4;MCM5;ANAPC13;PCNA;PRKDC;HDAC1;CUL1;TTK;ANAPC10;CCNB2;CCNB1;FZR1;CDC45;ORC2;BUB3;BUB1;CREBBP;SMAD4;TGFB2;SMAD3;GADD45B;GADD45A;CDKN2A;PLK1;GADD45G;STAG1;STAG2;CDK4;CDC16;CDK1;MDM2;ATM;MAD2L1
Ubiquitin mediated proteolysis	63/140	0.000179557	0.0018477	0	0	1.8837	16.2469	UBE3C;KEAP1;CBLB;UBE2L6;CDC20;HERC3;CDC23;HERC1;CDC26;CDC27;SKP2;SKP1;PIAS4;FBXW8;FBXW7;UBE4A;UBE4B;MID1;RBX1;DDB2;UBE2R2;BIRC6;UBA52;BIRC3;ANAPC13;CUL5;UBA7;CUL3;CUL2;CUL1;XIAP;RNF7;CBL;ANAPC10;RHOBTB2;FZR1;UBB;UBC;UBR5;RPS27A;UBE2F;UBE2H;UBE2I;MAP3K1;PPIL2;SMURF2;UBE2B;UBE2C;HUWE1;WWP1;UBE2A;PML;ITCH;UBE2S;NEDD4;CDC16;MDM2;UBA1;STUB1;TRIM37;TRIP12;UBE2K;TRIM32
Toxoplasmosis	52/112	0.000248778	0.00248	0	0	1.99412	16.5491	ITGB1;CD40;LAMC1;TNF;CASP9;IKBKB;CASP3;AKT3;IL12A;MAP3K7;HLA-DPA1;MAP2K3;PDPK1;IFNGR2;IRAK4;TNFRSF1A;IFNG;PPIF;ITGA6;BIRC3;HLA-DQB1;LAMA2;LAMA4;LY96;XIAP;GNAI1;RELA;GNAI2;MAPK9;HLA-DMA;HLA-DMB;MAPK1;LDLR;MAP2K6;HSPA8;TGFB2;NOS2;BAD;STAT1;LAMB4;STAT3;LAMB1;HSPA2;IRGM;NFKBIA;CD40LG;HLA-DPB1;CYCS;TAB2;MYD88;HSPA1B;HSPA1A
Influenza A	74/172	0.000290925	0.00281227	0	0	1.73901	14.1598	PRSS1;CXCL8;IFNA2;ADAR;PIK3CB;NXT2;TNF;ACTB;ACTG1;ICAM1;PYCARD;CASP9;IKBKB;XPO1;CASP3;AKT3;TNFSF10;EP300;TRIM25;IL12A;KPNA5;KPNA2;KPNA1;HLA-DPA1;IFNA13;RSAD2;DDX58;IFNGR2;IRAK4;TICAM1;TNFRSF1A;DNAJC3;IFNG;OAS1;PIK3CA;OAS2;VDAC1;NUP98;RAF1;SLC25A5;SLC25A4;IRF9;HLA-DQB1;SLC25A6;TPSD1;PIK3R2;PIK3R1;RELA;HLA-DMA;HLA-DMB;PABPN1;CCL5;MAPK1;FADD;BID;RAE1;IFNA21;FDPS;CREBBP;STAT1;MX2;STAT2;MX1;EIF2AK2;PM…
Glutathione metabolism	30/57	0.000371491	0.00348546	0	0	2.55333	20.1662	GSTP1;MGST3;ODC1;MGST1;MGST2;TXNDC12;SRM;CHAC1;GSTM4;GSTK1;GSTM3;G6PD;GGT7;GSTM2;GPX1;GSTM1;RRM2;GPX4;GPX3;GSTO1;GSS;IDH1;GPX5;IDH2;GPX8;GPX7;PGD;PRDX6;GSTA4;LAP3
Spliceosome	65/150	0.000520106	0.0047404	0	0	1.76015	13.3093	TCERG1;DDX42;HNRNPU;USP39;PQBP1;SNRPD2;SNRPD1;MAGOH;DHX15;DHX16;SNRPD3;ISY1-RAB43;RBM17;BUD31;PRPF40B;THOC3;THOC2;PLRG1;WBP11;SRSF2;SRSF3;SNRPE;SRSF4;SNRPA1;SNRPF;SRSF5;SNRPC;SRSF7;SRSF8;SF3B4;SF3B2;DHX8;RBM8A;SF3B6;DDX23;SNU13;U2AF1;ZMAT2;PUF60;U2AF2;TRA2B;TRA2A;HNRNPA1;HSPA8;HNRNPA3;PPIL1;SF3A1;PRPF38A;SF3A2;ALYREF;CWC15;HSPA2;MAGOHB;LSM4;LSM3;LSM2;LSM8;LSM7;HNRNPK;LSM6;PHF5A;HNRNPC;RBMX;HSPA1B…
Human immunodeficiency virus 1 infection	87/212	0.000602866	0.00534206	0	0	1.60324	11.8861	IFNA2;PIK3CB;CD3D;TNF;IKBKB;CASP9;PPP3CA;TRIM5;CFL2;CASP3;AKT3;CHEK1;AP1S2;RAC2;AP1S1;RAC3;RAC1;B2M;HRAS;MAP3K7;SKP1;MAP2K3;PDIA3;IFNA13;AP1B1;HLA-B;TAP2;HLA-A;IRAK4;HLA-F;CDC25C;TNFRSF1B;HLA-G;HLA-E;RBX1;TAPBP;TNFRSF1A;PIK3CA;RAF1;CRK;CUL5;CUL1;ITPR2;PIK3R2;ITPR3;PIK3R1;RNF7;GNAI1;RELA;GNAI2;CCNB2;MAPK9;GNG10;PPP3R1;CCNB1;GNG5;GNG7;PLCG2;MAPK1;RIPK1;FADD;BID;MAP2K7;PAK2;AP1M1;IFNA21;MAP2K6;JUN;B…
Focal adhesion	82/201	0.0010464	0.00902169	0	0	1.58666	10.8883	ITGB1;MYLK2;GSK3B;FLT1;FLT4;RASGRF1;PTEN;LAMC1;PIK3CB;ARHGAP5;ACTB;ARHGAP35;ACTG1;MYLK4;PPP1CB;CCND2;CCND1;AKT3;KDR;RAC2;RAC3;TNR;ITGAV;RAC1;HRAS;VAV3;PPP1R12A;VWF;PDPK1;ITGA2;ITGA1;ACTN4;RHOA;COL4A2;PIK3CA;MYL2;COL6A2;COL6A1;COL4A5;ITGA7;ITGA6;ITGA5;TLN1;RAF1;SOS1;CRK;DOCK1;BIRC3;LAMA2;ROCK1;ROCK2;LAMA4;PDGFB;XIAP;PIK3R2;PIK3R1;MYL12A;MYL12B;THBS3;CDC42;MAPK9;RELN;RAP1A;SPP1;MYL10;FLNA;MAPK1;PIP…
Chronic myeloid leukemia	36/76	0.00135252	0.0110424	0	0	2.06832	13.6629	RB1;CDKN1A;CTBP2;HDAC1;ARAF;PIK3R2;PIK3CB;PIK3R1;CBL;RELA;IKBKB;CCND1;MECOM;AKT3;MAPK1;POLK;HRAS;SMAD4;TGFB2;SMAD3;GADD45B;BAD;CDKN2A;GADD45A;BRAF;PTPN11;DDB2;GADD45G;NFKBIA;PIK3CA;CDK4;MDM2;KRAS;RAF1;SOS1;CRK
Endometrial cancer	29/58	0.00135617	0.0110424	0	0	2.29729	15.1692	GSK3B;CDKN1A;ARAF;PTEN;PIK3R2;PIK3CB;PIK3R1;CASP9;CCND1;AKT3;CTNNA1;MAPK1;POLK;HRAS;APC2;TCF7L2;TCF7L1;GADD45B;PDPK1;BAD;GADD45A;BRAF;DDB2;GADD45G;PIK3CA;APC;KRAS;RAF1;SOS1
Pathogenic Escherichia coli infection	80/197	0.00139641	0.0110424	0	0	1.57412	10.348	CYFIP2;ITGB1;CYFIP1;CXCL8;WIPF2;ARPC1B;BRK1;WASL;CLDN1;TNF;ACTB;ACTG1;IKBKB;PYCARD;TUBB8;CASP9;TUBA1C;TUBA1B;TUBB6;TUBA1A;TUBB3;CASP3;CLDN23;TNFSF10;RAC1;MAP3K7;NCK1;ARHGEF11;ACTR2;ARHGEF12;TUBB;IRAK4;RHOA;TUBA4A;TNFRSF1A;CLDN11;CLDN5;CLDN10;TUBB2A;CTTN;CLDN18;HCLS1;MYH9;ARHGEF2;RAB1A;ROCK1;ROCK2;RELA;CDC42;CYTH3;GNA13;SLC9A3R1;MAPK9;MYO6;MAPK1;RIPK1;FADD;PAK2;WASF2;WASF3;JUN;SEC24B;SEC24A;MYO10;…
Small cell lung cancer	42/92	0.00141924	0.0110424	0	0	1.93096	12.6625	ITGB1;RB1;CDKN1A;LAMA2;LAMA4;PTEN;XIAP;PIK3R2;LAMC1;PIK3CB;PIK3R1;RELA;CKS1B;CASP9;IKBKB;CCND1;CASP3;AKT3;ITGAV;POLK;SKP2;GADD45B;NOS2;GADD45A;ITGA2;LAMB4;FN1;LAMB1;TRAF1;PTK2;DDB2;GADD45G;NFKBIA;COL4A2;PIK3CA;CCNE1;CDK4;CKS2;COL4A5;CYCS;ITGA6;BIRC3
Tight junction	70/169	0.00145868	0.011079	0	0	1.62719	10.6259	ITGB1;ARPC1B;PRKAG1;PPP2R2A;MYL6B;F11R;CLDN1;YBX3;ACTB;ACTG1;TUBA1C;STK11;TUBA1B;TUBA1A;CCND1;PPP2R1B;PPP2R1A;CLDN23;RAC1;SYNPO;CGNL1;RAB8A;RAB8B;MAGI1;ACTR2;PRKAB2;ACTN4;TUBA4A;RHOA;CLDN11;CLDN5;CLDN10;MYL6;CTTN;MYL2;PARD3;CLDN18;HCLS1;MYH9;RAPGEF2;ARHGEF2;RAPGEF6;LLGL1;PRKAA1;PCNA;ROCK1;ROCK2;MYL12A;MYL12B;CDC42;SLC9A3R1;MAPK9;RAP1A;WHAMM;MAP2K7;VASP;JUN;MAP3K1;RDX;MSN;ARPC4;CGN;TJAP1;TJP1;DLG1…
FoxO signaling pathway	56/131	0.00178052	0.013209	0	0	1.7173	10.8719	CDKN1A;ARAF;PRKAG1;PTEN;IRS2;PIK3CB;GRM1;IKBKB;STK11;CCND2;CCND1;AKT3;TNFSF10;EP300;HOMER3;SKP2;HRAS;GABARAPL2;PRKAB2;USP7;PDPK1;CSNK1E;SIRT1;PIK3CA;RAF1;SGK1;SOS1;PRKAA1;FOXG1;PIK3R2;PIK3R1;CCNB2;MAPK9;CCNB1;MAPK1;PLK4;PLK3;CREBBP;SMAD4;TGFB2;SMAD3;GADD45B;HOMER1;GADD45A;INSR;PLK1;STAT3;BRAF;SOD2;GADD45G;G6PC3;BCL6;CCNG2;MDM2;ATM;KRAS
Yersinia infection	58/137	0.00195807	0.014196	0	0	1.68864	10.53	ITGB1;GSK3B;CXCL8;WIPF2;ARPC1B;PIK3CB;WASL;TNF;ACTB;ACTG1;PYCARD;IKBKB;AKT3;RPS6KA1;RAC2;RAC3;RAC1;MAP3K7;MAP2K3;VAV3;ACTR2;ARHGEF12;RHOG;IRAK4;TICAM1;RHOA;PIK3CA;ITGA5;CRK;DOCK1;ROCK1;ROCK2;ARHGEF28;PIK3R2;PIK3R1;NLRC4;MEFV;RELA;CDC42;MAPK9;MAPK1;PIP5K1C;MAP2K7;WASF2;MAP2K6;JUN;FN1;NFATC2;ARPC4;BAIAP2;PTK2;NFKBIA;ARPC3;GNAQ;TAB2;PKN2;MYD88;BCAR1
Human cytomegalovirus infection	89/225	0.00201475	0.0142824	0	0	1.50674	9.35274	RB1;ATF2;GSK3B;CDKN1A;CXCL8;IFNA2;PIK3CB;TNF;CX3CL1;IKBKB;CASP9;AKAP13;PPP3CA;CCND1;CASP3;AKT3;RAC2;RAC3;ITGAV;RAC1;B2M;HRAS;IL6R;PDIA3;ARHGEF11;IFNA13;ARHGEF12;HLA-B;TAP2;TSC1;HLA-A;HLA-F;HLA-G;RHOA;HLA-E;TAPBP;TNFRSF1A;CREB3;PIK3CA;PLCB1;RAF1;SOS1;CRK;ATF4;ROCK1;ROCK2;ADCY4;ITPR2;PIK3R2;ADCY2;ITPR3;PIK3R1;GNAI1;RELA;GNAI2;GNA13;GNG10;PPP3R1;GNG5;CCL5;GNG7;MAPK1;RIPK1;FADD;BID;IFNA21;MAP2K6;CCR1…
Lipid and atherosclerosis	85/215	0.00254469	0.0176469	0	0	1.50509	8.99103	ERO1A;GSK3B;CD40;CXCL8;HSP90AB1;IFNA2;VLDLR;PIK3CB;CXCL3;TNF;ICAM1;IKBKB;PYCARD;CASP9;PPP3CA;CASP6;CASP3;AKT3;TNFSF10;IL12A;RAC1;HRAS;MAP3K7;VAV3;MAP2K3;IFNA13;TICAM2;MMP1;PDPK1;CYBA;APOA4;IRAK4;TICAM1;RHOA;TNFRSF1A;PIK3CA;PPARG;PLCB1;ABCG1;ATF4;CAMK2D;ROCK2;CAMK2A;LY96;PIK3R2;PIK3R1;TANK;RELA;HSP90B1;HSPD1;CDC42;MAPK9;PPP3R1;RAP1A;CCL5;MAPK1;BID;MAP2K7;LDLR;CAMK2G;IFNA21;MAP2K6;HSPA8;JUN;XBP1;BA…
Viral myocarditis	29/60	0.00262302	0.017803	0	0	2.14877	12.771	CD40;LAMA2;ACTB;ACTG1;ICAM1;CASP9;HLA-DMA;HLA-DMB;CCND1;CASP3;DAG1;RAC2;RAC3;ABL2;RAC1;BID;HLA-DPA1;HLA-B;HLA-A;HLA-F;HLA-G;HLA-E;CD40LG;HLA-DPB1;CYCS;EIF4G3;MYH6;EIF4G2;HLA-DQB1
Peroxisome	37/82	0.00338777	0.0225146	0	0	1.88921	10.745	ABCD4;MVK;ECI2;PEX11B;MPV17L2;HSD17B4;HMGCL;SCP2;PRDX1;PMVK;HACL1;MPV17;DECR2;PEX16;GSTK1;PHYH;NOS2;IDH1;ECH1;IDH2;ACSL5;PEX2;ACSL3;SOD2;PEX13;PEX14;DHRS4;SOD1;GNPAT;NUDT7;AMACR;ACOX1;PXMP2;PXMP4;FAR1;AGXT;SLC27A2
Folate biosynthesis	15/26	0.00347125	0.0225985	0	0	3.12948	17.723	CBR1;MOCS2;TPH1;GCH1;AKR1C3;AKR1B1;GGH;PTS;QDPR;SPR;ALPP;PAH;FPGS;PCBD1;MOCS1
Phagosome	62/152	0.0039981	0.0255079	0	0	1.58427	8.74825	ITGB1;SCARB1;ITGAM;CLEC4M;TCIRG1;ACTB;CTSS;ACTG1;TUBB8;EEA1;MRC2;TUBA1C;TUBB6;TUBA1B;TUBA1A;TUBB3;CTSL;SEC61G;ITGAV;RAC1;SEC61B;ATP6V1E1;HLA-DPA1;ATP6V1G1;ATP6V0B;ATP6V0E1;ATP6AP1;ITGA2;TUBB;STX7;HLA-B;TAP2;CYBA;HLA-A;HLA-F;HLA-G;TUBA4A;HLA-E;DYNC1LI2;TUBB2A;HGS;CANX;ITGA5;HLA-DQB1;VAMP3;ATP6V1A;COLEC12;THBS3;HLA-DMA;HLA-DMB;ATP6V0A4;ATP6V0E2;ATP6V1C1;DYNC1I1;DYNC1H1;TUBB4B;TUBB4A;MARCO;HLA-DPB1;…
DNA replication	19/36	0.00413206	0.0258456	0	0	2.56553	14.0822	RFC5;RNASEH2C;FEN1;PCNA;RNASEH2A;RFC4;MCM7;RFC1;PRIM1;POLE4;POLD4;RPA3;POLD2;RPA4;MCM3;MCM4;MCM5;SSBP1;POLE
Human T-cell leukemia virus 1 infection	85/219	0.00459828	0.0282087	0	0	1.45974	7.85642	RB1;ATF2;NRP1;CD40;CDKN1A;PTEN;PIK3CB;CD3D;ETS1;TNF;ICAM1;CDC20;ELK4;IKBKB;PPP3CA;CDC23;XPO1;CCND2;CCND1;PTTG1;CDC26;AKT3;CDC27;CHEK1;TSPO;EP300;B2M;HRAS;HLA-DPA1;HLA-B;HLA-A;HLA-F;HLA-G;HLA-E;TNFRSF1A;CCNA2;CCNA1;CREB3;PIK3CA;CCNE1;CANX;VDAC3;VDAC2;VDAC1;TLN1;SLC25A5;SLC25A4;ATF4;HLA-DQB1;SLC25A6;ADCY4;GPS2;XIAP;PIK3R2;ADCY2;PIK3R1;ANAPC10;RELA;RELB;CCNB2;MAPK9;PPP3R1;HLA-DMA;HLA-DMB;MAPK1;BUB3;…
Steroid biosynthesis	12/20	0.00573982	0.0341361	0	0	3.44147	17.7591	SQLE;EBP;SC5D;DHCR24;MSMO1;CEL;DHCR7;HSD17B7;LIPA;LSS;LBR;FDFT1
Hepatitis C	63/157	0.00577852	0.0341361	0	0	1.54113	7.94239	RB1;SCARB1;GSK3B;CDKN1A;CD81;IFNA2;ARAF;PPP2R2A;PIK3CB;IFIT1;CLDN1;TNF;CASP9;IKBKB;CCND1;PPP2R1B;PPP2R1A;CASP3;AKT3;CLDN23;HRAS;YWHAH;IFNA13;RSAD2;DDX58;TICAM1;TNFRSF1A;CLDN11;CLDN5;CLDN10;IFNG;OAS1;PIK3CA;OAS2;CLDN18;RAF1;SOS1;IRF9;PIK3R2;PIK3R1;RELA;MAPK1;RIPK1;FADD;BID;LDLR;IFNA21;BAD;STAT1;MX2;STAT2;MX1;STAT3;EIF2AK3;EIF2AK2;BRAF;EIF2AK4;NFKBIA;MAVS;CDK4;CYCS;EIF3E;KRAS
Valine, leucine and isoleucine degradation	23/48	0.00795498	0.0455319	0	0	2.11202	10.2094	ACAD8;BCKDHA;MCCC2;ACAA2;ECHS1;BCKDHB;HSD17B10;ACAT2;ACAT1;ALDH3A2;HADHB;HMGCL;HADHA;OXCT1;DBT;PCCB;HADH;BCAT1;ACADS;ALDH7A1;DLD;ALDH9A1;BCAT2
Measles	56/139	0.0080737	0.0455319	0	0	1.55088	7.4739	GSK3B;CLEC4M;IFNA2;CBLB;ADAR;PIK3CB;CD3D;CASP9;IKBKB;CCND2;CCND1;CASP3;AKT3;IL12A;MAP3K7;IFNA13;CSNK2A1;DDX58;CSNK2A2;IRAK4;OAS1;PIK3CA;CCNE1;OAS2;CSNK2B;IRF9;PIK3R2;PIK3R1;RELA;MAPK9;FADD;BID;IFNA21;HSPA8;JUN;BAD;STAT1;MX2;STAT2;MX1;STAT3;EIF2AK3;EIF2AK2;MSN;EIF2AK4;HSPA2;NFKBIA;MAVS;CDK4;CYCS;EIF3H;RAB9A;TAB2;MYD88;HSPA1B;HSPA1A
Hepatitis B	64/162	0.0081358	0.0455319	0	0	1.50151	7.22448	RB1;ATF2;CDKN1A;CXCL8;DDX3X;IFNA2;ARAF;PIK3CB;TNF;CASP9;IKBKB;CASP12;CASP3;AKT3;EP300;MAP3K7;HRAS;MAP2K3;IFNA13;TICAM2;ATP6AP1;DDX58;IRAK4;TICAM1;DDB2;CCNA2;CCNA1;CREB3;PIK3CA;CCNE1;VDAC3;BIRC5;RAF1;SOS1;ATF4;PCNA;PIK3R2;PIK3R1;RELA;MAPK9;MAPK1;FADD;MAP2K7;BID;IFNA21;MAP2K6;CREBBP;JUN;SMAD4;TGFB2;SMAD3;MAP3K1;BAD;STAT1;STAT2;STAT3;NFATC2;BRAF;NFKBIA;MAVS;CYCS;TAB2;KRAS;MYD88
Glioma	33/75	0.00864599	0.047553	0	0	1.80452	8.57264	RB1;CDKN1A;CAMK2D;CAMK2A;ARAF;PTEN;PDGFB;TGFA;PIK3R2;PIK3CB;PIK3R1;CCND1;AKT3;PLCG2;MAPK1;POLK;HRAS;CAMK2G;GADD45B;CDKN2A;GADD45A;BRAF;MTOR;DDB2;GADD45G;PIK3CA;CDK4;MDM2;KRAS;CAMK1;RAF1;SOS1;CALM1
Various types of N-glycan biosynthesis	19/39	0.0123109	0.0665624	0	0	2.18023	9.58707	B4GALT3;B4GALT1;RPN2;TUSC3;HEXB;HEXA;ALG14;ALG2;ALG13;ALG3;ALG1;DDOST;MGAT4D;MAN2A2;MAN1A2;MAN2A1;DAD1;MGAT1;STT3B
Hepatocellular carcinoma	65/168	0.0129264	0.0687254	0	0	1.45066	6.30816	RB1;GSK3B;CDKN1A;ARAF;PTEN;KEAP1;PIK3CB;ACTB;ACTG1;CCND1;AKT3;DPF1;POLK;ARID2;HRAS;APC2;SMARCC1;SMARCC2;GSTO1;ACTL6A;WNT9B;ARID1A;ARID1B;DDB2;PIK3CA;RAF1;SOS1;MGST3;GSTP1;MGST1;MGST2;TGFA;PIK3R2;PIK3R1;LRP6;PLCG2;MAPK1;BRD7;GSTM4;GSTM3;NQO1;TCF7L2;GSTM2;SMAD4;TGFB2;TCF7L1;GSTM1;SMAD3;GADD45B;PHF10;GADD45A;BAD;CDKN2A;TXNRD2;TXNRD1;IGF2;FZD8;BRAF;MTOR;GADD45G;APC;GSTA4;RPS6KB1;CDK4;KRAS
Retrograde endocannabinoid signaling	58/148	0.0136031	0.0700535	0	0	1.48108	6.36487	DAGLA;NDUFA11;NDUFA12;NDUFA10;NDUFC2-KCTD14;GRM1;NDUFC2;NDUFC1;NDUFS8;NDUFS7;NDUFS6;NDUFS5;NDUFS4;NDUFS2;ND3;DAGLB;PLCB1;ND6;NDUFB9;NDUFB8;NDUFB7;NDUFB10;NDUFB6;NDUFB11;NDUFB5;NDUFB4;NDUFB3;ADCY4;NDUFB2;ITPR2;NDUFB1;ABHD6;ITPR3;ADCY2;GNAI1;GNAI2;MAPK9;GNG10;GNG5;GNG7;MAPK1;NDUFV3;NDUFV2;NDUFV1;NDUFA9;NDUFA7;NDUFA6;NDUFA4;NDUFA3;NDUFA2;NDUFA1;GNG11;GNG13;GNAQ;GNB1;NDUFAB1;GNB4;NAPEPLD
Bacterial invasion of epithelial cells	33/77	0.0136154	0.0700535	0	0	1.72225	7.39972	ITGB1;ARPC1B;CLTC;PIK3R2;PIK3CB;WASL;PIK3R1;CBL;ACTB;ACTG1;CDC42;CTNNA1;RAC1;WASF2;ACTR2;SEPTIN1;SEPTIN2;RHOG;FN1;SEPTIN6;ARPC4;RHOA;PTK2;CD2AP;ARHGAP10;CTTN;PIK3CA;ARPC3;HCLS1;ITGA5;CRK;DOCK1;BCAR1
Shigellosis	91/246	0.0150948	0.0764322	0	0	1.35034	5.66254	ITGB1;GSK3B;GSK3A;CXCL8;ARPC1B;WASL;PIK3CB;FNBP1L;TNF;ACTB;ACTG1;HK1;IKBKB;PYCARD;AKT3;RAC1;CAPN1;MAP3K7;SKP1;CAST;GABARAPL2;ACTR2;FNBP1;WIPI1;ACTN4;ATG14;RHOA;RBX1;TNFRSF1A;CTTN;PIK3CA;MYL2;HCLS1;VDAC1;RBCK1;ARHGEF2;UBE2V1;ITGA5;PFN1;TLN1;PLCB1;UBA52;SQSTM1;CRK;DOCK1;PPID;PFN2;ROCK1;ROCK2;CUL1;ITPR2;PIK3R2;ITPR3;U2AF1;BCL10;PIK3R1;NLRC4;MYL12A;RELA;MYL12B;CDC42;CYTH3;MAPK9;UBB;CCL5;UBC;TIFA;PLCG…
Biosynthesis of unsaturated fatty acids	14/27	0.0159471	0.0782635	0	0	2.47072	10.225	ELOVL1;ACOT7;ELOVL4;ELOVL5;TECR;SCD5;HSD17B4;ELOVL6;HACD3;FADS2;SCP2;ACOX1;SCD;FADS1
Fatty acid elongation	14/27	0.0159471	0.0782635	0	0	2.47072	10.225	ELOVL1;ACAA2;ECHS1;ACOT7;ELOVL4;ELOVL5;TECR;ELOVL6;HACD3;HADHB;HADHA;PPT1;PPT2;HADH
Human papillomavirus infection	119/331	0.0163662	0.0791035	0	0	1.29175	5.31238	RB1;MAML2;MAML1;PPP2R2A;TNF;CCND2;PPP2R1B;CCND1;PPP2R1A;AKT3;EP300;TNR;ATP6V1E1;MAGI1;ATP6V1G1;IFNA13;ATP6V0E1;HLA-B;TSC1;HLA-A;HLA-F;TICAM1;HLA-G;HLA-E;COL4A2;CCNE1;PARD3;MFNG;COL4A5;RAF1;LLGL1;ATP6V1A;PIK3R2;PIK3R1;PSEN1;SLC9A3R1;ATP6V0A4;FADD;ATP6V1C1;IFNA21;CREBBP;JAG1;FN1;EIF2AK2;FZD8;ISG15;PTK2;DLG1;CDK4;RHEB;GNAS;MDM2;ATM;ITGB1;GSK3B;CDKN1A;IFNA2;PTEN;LAMC1;PIK3CB;TCIRG1;IKBKB;HEY1;PPP2R5E…
Acute myeloid leukemia	29/67	0.0171391	0.0816023	0	0	1.75206	7.12456	ITGAM;ARAF;PIK3R2;PIK3CB;PIK3R1;RELA;IKBKB;CCND1;AKT3;MAPK1;HRAS;TCF7L2;TCF7L1;JUP;BAD;ZBTB16;STAT3;BRAF;DUSP6;MTOR;PML;CCNA2;CCNA1;PIK3CA;RPS6KB1;RARA;KRAS;RAF1;SOS1
VEGF signaling pathway	26/59	0.0180496	0.0846738	0	0	1.80857	7.26073	HSPB1;PIK3R2;PIK3CB;PIK3R1;CASP9;CDC42;PPP3CA;PPP3R1;AKT3;KDR;RAC2;PLCG2;RAC3;MAPK1;RAC1;HRAS;SPHK2;BAD;PLA2G4A;NFATC2;PTK2;VEGFA;PIK3CA;MAPKAPK2;KRAS;RAF1
Regulation of actin cytoskeleton	81/218	0.0186218	0.0853524	0	0	1.35938	5.41499	CYFIP2;ITGB1;CYFIP1;MYLK2;ITGAM;ARPC1B;ARAF;BRK1;WASL;PIK3CB;ACTB;ARHGAP35;ACTG1;MYLK4;PPP1CB;FGF7;CFL2;RAC2;PIP4K2A;RAC3;ITGAV;RAC1;HRAS;APC2;VAV3;ACTR2;ARHGEF12;PPP1R12A;ITGA2;ITGA1;RRAS2;ACTN4;RHOA;ENAH;PIK3CA;MYL2;ITGA7;MYH9;ITGA6;ITGA5;PFN1;RAF1;SOS1;CRK;DOCK1;PFN2;ROCK1;ROCK2;PDGFB;PIK3R2;IQGAP1;PIK3R1;MYL12A;FGD1;KNG1;MYL12B;SLC9A1;CDC42;GNA13;SCIN;RRAS;MYL10;MAPK1;PIP5K1C;PAK2;WASF2;GSN;R…
Citrate cycle (TCA cycle)	15/30	0.0189969	0.0853524	0	0	2.29429	9.09338	FH;PDHA1;MDH1;IDH3G;MDH2;IDH1;IDH2;PDHB;SDHD;SDHB;CS;OGDH;SUCLG1;ACO2;DLD
Pentose phosphate pathway	15/30	0.0189969	0.0853524	0	0	2.29429	9.09338	PRPS2;GPI;PRPS1;TKTL1;G6PD;H6PD;RPE;GLYCTK;TALDO1;PGD;DERA;IDNK;PGLS;ALDOA;TKT
ErbB signaling pathway	35/85	0.0222095	0.0979119	0	0	1.60727	6.11924	GSK3B;CDKN1A;CAMK2D;CAMK2A;ARAF;TGFA;CBLB;PIK3R2;PIK3CB;PIK3R1;CBL;MAPK9;ERBB4;AKT3;PLCG2;ABL2;MAPK1;MAP2K7;HRAS;CAMK2G;PAK2;NCK1;JUN;BAD;BRAF;MTOR;PTK2;PIK3CA;RPS6KB1;NRG4;KRAS;RAF1;SOS1;CRK;HBEGF
Pathways in cancer	183/531	0.0224062	0.0979119	0	0	1.21116	4.60049	RB1;CSF3R;IL23R;ARAF;KEAP1;ETS1;FGF7;EDNRB;CCND2;CCND1;AKT3;EP300;IL12A;SKP2;IL6R;SKP1;IFNA13;FLT3LG;RBX1;COL4A2;CCNE1;COL4A5;IL6ST;RAF1;CTBP2;MGST3;CUL2;PDGFB;CUL1;MGST1;MGST2;TGFA;PIK3R2;PIK3R1;PLD1;HIF1A;KNG1;HSP90B1;GNG10;TPR;PLCG2;FADD;IFNA21;GSTM4;GSTM3;CREBBP;GSTM2;JUN;SMAD4;TGFB2;GSTM1;JAG1;SMAD3;JUP;GADD45B;GADD45A;ZBTB16;FN1;IGF2;FZD8;BRAF;GNG11;ESR1;PTK2;GADD45G;GNG13;BMP4;NFKBIA;BMP2;…
Other glycan degradation	10/18	0.0228977	0.0986233	0	0	2.86694	10.8276	MANBA;NEU4;MAN2B2;FUCA1;HEXB;FUCA2;HEXA;NEU1;MAN2B1;AGA
Ubiquinone and other terpenoid-quinone biosynthesis	7/11	0.0231873	0.0986233	0	0	4.01289	15.1051	VKORC1;NQO1;VKORC1L1;COQ2;GGCX;COQ6;COQ5
Protein export	12/23	0.0236593	0.0993066	0	0	2.50235	9.36878	OXA1L;SPCS3;IMMP2L;SPCS1;SRP72;SEC61G;SRP54;SEC61B;SRP14;SEC11A;SRP9;SEC63
Prostate cancer	39/97	0.0248568	0.102978	0	0	1.54406	5.70471	RB1;GSK3B;CDKN1A;HSP90AB1;GSTP1;ARAF;PDGFB;PTEN;TGFA;PIK3R2;PIK3R1;PIK3CB;RELA;HSP90B1;CASP9;IKBKB;CCND1;AKT3;EP300;MAPK1;HRAS;TCF7L2;CREBBP;TCF7L1;PDPK1;BAD;BRAF;MTOR;NFKBIA;CREB3;ZEB1;PIK3CA;CCNE1;MDM2;KRAS;ERG;RAF1;SOS1;ATF4
Nucleotide excision repair	21/47	0.0268464	0.109795	0	0	1.85345	6.70509	RFC5;GTF2H2C_2;GTF2H2C;PCNA;RFC4;RFC1;CETN2;XPA;GTF2H2;GTF2H4;RAD23B;GTF2H5;DDB2;RBX1;POLE4;POLD4;ERCC1;RPA3;POLD2;RPA4;POLE
Cholesterol metabolism	22/50	0.0287573	0.116121	0	0	1.80306	6.3988	SCARB1;STARD3;CETP;LRPAP1;LRP1;SORT1;LCAT;APOA4;ABCB11;LIPA;CYP27A1;NCEH1;NPC2;VAPB;ANGPTL3;VDAC3;TSPO;VDAC2;VDAC1;ANGPTL4;LDLRAP1;LDLR
Antigen processing and presentation	32/78	0.0294443	0.117409	0	0	1.59695	5.62966	HSP90AB1;IFI30;TNF;CTSS;KIR2DL4;HLA-DMA;HLA-DMB;CTSL;B2M;HLA-DPA1;PDIA3;HSPA8;NFYC;HLA-B;TAP2;RFXANK;HLA-A;HSPA2;HLA-F;HLA-G;HLA-E;TAPBP;IFNG;CANX;RFX5;RFXAP;PSME1;HLA-DPB1;HSPA1B;HLA-DQB1;HSPA1A;LGMN
C-type lectin receptor signaling pathway	41/104	0.0305852	0.120453	0	0	1.49437	5.21122	CLEC4M;ITPR2;CBLB;ITPR3;PIK3R2;BCL10;PIK3R1;PIK3CB;TNF;RELA;RELB;PYCARD;IKBKB;PPP3CA;MAPK9;PPP3R1;RRAS;AKT3;PLCG2;MAPK1;IL12A;HRAS;PLK3;JUN;ARHGEF12;KSR1;STAT1;STAT2;CARD9;NFATC2;RRAS2;PTPN11;RHOA;NFKBIA;PIK3CA;MAPKAPK2;MDM2;KRAS;RAF1;CALM1;IRF9
mTOR signaling pathway	58/154	0.0315527	0.122748	0	0	1.38791	4.79674	GSK3B;CAB39L;PTEN;PIK3CB;TNF;IKBKB;FLCN;STK11;AKT3;RPS6KA1;MLST8;ATP6V1E1;SKP2;HRAS;ATP6V1G1;SEC13;PDPK1;STRADB;RPS6;WNT9B;TSC1;RHOA;TNFRSF1A;SLC7A5;CLIP1;PIK3CA;ULK2;RAF1;SGK1;SOS1;ATP6V1A;PRKAA1;SEH1L;CAB39;NPRL2;NPRL3;PIK3R2;SLC3A2;PIK3R1;LRP6;MAPK1;SLC38A9;RICTOR;FNIP1;FNIP2;ATP6V1C1;INSR;FZD8;BRAF;MTOR;RPS6KB1;RHEB;KRAS;LAMTOR2;LAMTOR1;LAMTOR4;LPIN1;LPIN2
Basal transcription factors	20/45	0.0322018	0.123291	0	0	1.83563	6.30673	GTF2A1;GTF2H2C_2;GTF2A2;GTF2H2C;TAF15;TAF13;GTF2B;TAF10;TAF9;GTF2H2;GTF2H4;GTF2E2;GTF2H5;TAF7;GTF2IRD1;TAF4;TAF3;TAF2;GTF2I;TAF1
NOD-like receptor signaling pathway	67/181	0.0325216	0.123291	0	0	1.35039	4.62622	CXCL8;HSP90AB1;IFNA2;CXCL3;ANTXR1;TNF;TXN2;PYCARD;IKBKB;CASP12;NAMPT;MAP3K7;GABARAPL2;CASR;IFNA13;CYBA;IRAK4;TICAM1;RHOA;OAS1;OAS2;VDAC3;TXNIP;VDAC2;VDAC1;CARD16;RBCK1;PLCB1;IRF9;BIRC3;DEFB103A;DEFB103B;ITPR2;XIAP;ITPR3;TXN;NLRC4;MEFV;TANK;RELA;MAPK9;CCL5;MAPK1;RIPK1;TRPM7;FADD;TP53BP1;GBP2;GBP1;IFNA21;GSDMD;JUN;STAT1;DEFA4;CARD8;STAT2;CARD9;DEFA3;NFKBIA;MAVS;ATG16L1;TRIP6;PYDC2;TAB2;PKN2;MCU;MYD…
Sphingolipid signaling pathway	46/119	0.0328517	0.123291	0	0	1.44709	4.9429	ASAH1;ROCK1;ROCK2;PTEN;PPP2R2A;PIK3R2;PIK3R1;PIK3CB;PLD1;TNF;KNG1;GNAI1;RELA;GNAI2;GNA13;MAPK9;SGPL1;SPTLC1;PPP2R1B;PPP2R1A;PPP2R5E;PPP2R3C;AKT3;RAC2;RAC3;MAPK1;S1PR3;RAC1;BID;HRAS;ABCC1;CERS5;PDPK1;SPHK2;PPP2R3B;PPP2R3A;RHOA;TNFRSF1A;PIK3CA;GNAQ;DEGS1;KRAS;RAF1;PLCB1;NSMAF;CERS2
p53 signaling pathway	30/73	0.0334142	0.123943	0	0	1.60141	5.44283	CDKN1A;EI24;SERPINE1;PTEN;PPM1D;CASP9;TP53AIP1;CCNB2;CCNB1;CCND2;CCND1;CASP3;CHEK1;BID;RRM2;GADD45B;CDKN2A;GADD45A;SHISA5;DDB2;GADD45G;TP53I3;CCNE1;CDK4;CCNG2;CDK1;MDM2;CYCS;ATM;MDM4
Leukocyte transendothelial migration	44/114	0.0371871	0.136049	0	0	1.44333	4.75114	ITGB1;ITGAM;ROCK1;ROCK2;CTNND1;PIK3R2;PIK3R1;THY1;PIK3CB;F11R;ARHGAP5;CLDN1;ACTB;ARHGAP35;MYL12A;GNAI1;ACTG1;ICAM1;MYL12B;GNAI2;CDC42;RAP1A;CLDN23;PLCG2;RAC2;CTNNA1;MYL10;RAC1;CD99;VASP;VAV3;MSN;CYBA;PTPN11;ACTN4;PTK2;RHOA;CLDN11;CLDN5;CLDN10;PIK3CA;MYL2;CLDN18;BCAR1
AMPK signaling pathway	46/120	0.0379566	0.136049	0	0	1.42743	4.66957	PRKAA1;CAB39;CAB39L;PRKAG1;IRS2;PPP2R2A;PIK3R2;PIK3R1;PIK3CB;HMGCR;ADIPOR1;ELAVL1;STK11;CCND1;PPP2R1B;PPP2R1A;PPP2R5E;PPP2R3C;AKT3;MAP3K7;RAB8A;RAB2A;SREBF1;CPT1A;PRKAB2;PDPK1;INSR;STRADB;SCD5;TSC1;PPP2R3B;PPP2R3A;EEF2;SIRT1;MTOR;RAB11B;CCNA2;CCNA1;CREB3;TBC1D1;G6PC3;PIK3CA;RPS6KB1;RHEB;SCD;PPARG
Gap junction	35/88	0.0379572	0.136049	0	0	1.51596	4.95915	HTR2B;ADCY4;PDGFB;ITPR2;ADCY2;ADRB1;ITPR3;GRM1;GNAI1;GNAI2;TUBB8;TUBA1C;GJA1;TUBA1B;TUBB6;TUBA1A;MAPK7;TUBB3;MAPK1;HRAS;GUCY1A2;TUBB;TUBB4B;TUBB4A;TUBA4A;TJP1;TUBB2A;GNAQ;CDK1;GNAS;KRAS;PLCB1;RAF1;SOS1;TUBA8
Legionellosis	24/57	0.0400409	0.141923	0	0	1.66889	5.37026	RAB1A;HSPA8;VCP;CXCL8;ITGAM;SAR1B;RAB1B;NLRC4;HSPA2;CXCL3;TNF;RELA;HSPD1;CASP9;PYCARD;EEF1G;NFKBIA;CASP3;EEF1A2;CYCS;IL12A;HSPA1B;MYD88;HSPA1A
HIF-1 signaling pathway	42/109	0.0421244	0.146549	0	0	1.43925	4.55828	CDKN1A;CAMK2D;FLT1;SERPINE1;CUL2;CAMK2A;PIK3R2;ENO1;PIK3R1;PIK3CB;PDHB;HIF1A;RELA;HK1;MKNK1;AKT3;PGK1;PLCG2;EP300;MAPK1;TIMP1;IL6R;CAMK2G;EGLN1;CREBBP;EDN1;PDHA1;ANGPT2;EGLN2;NOS2;INSR;IFNGR2;RPS6;STAT3;MTOR;RBX1;VEGFA;IFNG;PIK3CA;RPS6KB1;ALDOA;LDHAL6A
Terpenoid backbone biosynthesis	11/22	0.0422648	0.146549	0	0	2.29344	7.25598	FDPS;IDI1;ICMT;MVK;FNTA;FNTB;PMVK;MVD;HMGCR;ACAT2;ACAT1
Glyoxylate and dicarboxylate metabolism	14/30	0.0442493	0.15178	0	0	2.00703	6.25775	ACSS2;MDH1;MDH2;GLYCTK;ACAT2;ACAT1;GCSH;CS;AFMID;PCCB;ACO2;AGXT;GLUL;DLD
Ferroptosis	18/41	0.0463702	0.15626	0	0	1.79539	5.51382	PRNP;GPX4;GSS;ACSL5;SAT2;SLC3A2;SLC7A11;ACSL3;SAT1;SLC39A14;MAP1LC3B;FTH1;LPCAT3;PCBP2;VDAC3;VDAC2;SLC39A8;FTL
Choline metabolism in cancer	38/98	0.0466994	0.15626	0	0	1.45387	4.45468	DGKG;SLC22A4;DGKD;SLC44A2;DGKA;PDGFB;PIK3R2;PIK3R1;PIK3CB;PLD1;HIF1A;MAPK9;AKT3;RAC2;RAC3;MAPK1;PIP5K1C;RAC1;HRAS;WASF2;WASF3;JUN;LYPLA1;CHKB;PDPK1;PLA2G4A;TSC1;MTOR;PIK3CA;RPS6KB1;RHEB;DGKQ;KRAS;RAF1;SOS1;PLPP2;PLPP1;DGKH
Non-small cell lung cancer	29/72	0.0470251	0.15626	0	0	1.54777	4.73166	RB1;CDKN1A;ARAF;TGFA;PIK3R2;PIK3CB;PIK3R1;CASP9;CCND1;KIF5B;AKT3;PLCG2;MAPK1;POLK;HRAS;GADD45B;PDPK1;BAD;CDKN2A;GADD45A;STAT3;BRAF;DDB2;GADD45G;PIK3CA;CDK4;KRAS;RAF1;SOS1
Neurotrophin signaling pathway	45/119	0.0496769	0.16337	0	0	1.39617	4.1916	GSK3B;ZNF274;CAMK2D;CAMK2A;PIK3R2;PIK3R1;PSEN1;PIK3CB;RELA;IKBKB;CDC42;MAPK9;RAP1A;MAPK7;AKT3;ARHGDIB;RPS6KA1;PLCG2;MAPK1;RAC1;MAP2K7;HRAS;CAMK2G;NTRK1;JUN;MAP3K1;PDPK1;BAD;KIDINS220;SORT1;FRS2;BRAF;IRAK3;PTPN11;IRAK4;RHOA;NFKBIA;PIK3CA;MAPKAPK2;KRAS;RAF1;CALM1;SOS1;CRK;ATF4
Sulfur metabolism	6/10	0.0501956	0.163392	0	0	3.43905	10.2891	MPST;SELENBP1;TST;ETHE1;SUOX;PAPSS1
Glycerolipid metabolism	25/61	0.0507698	0.163592	0	0	1.59348	4.7493	DGKG;DGKD;MOGAT3;DGKA;AKR1B1;AGPAT3;AGPAT4;DGAT2;DGAT1;AGK;GLYCTK;AKR1A1;MBOAT1;CEL;ALDH3A2;DGKQ;LPIN1;ALDH7A1;PLPP2;GLA;LPIN2;PLPP1;PNLIP;ALDH9A1;DGKH
Epithelial cell signaling in Helicobacter pylori infection	28/70	0.0548592	0.175001	0	0	1.52984	4.4411	ATP6V1A;CXCL8;TCIRG1;CXCL3;F11R;RELA;IKBKB;CDC42;MAPK9;CXCR1;CASP3;CCL5;PLCG2;ATP6V0A4;RAC1;ATP6V1E1;ATP6V0E2;ATP6V1C1;ATP6V0B;ATP6V1G1;JUN;ATP6V0E1;ATP6AP1;PTPN11;NFKBIA;TJP1;ADAM17;HBEGF
RNA degradation	31/79	0.0579779	0.183118	0	0	1.48213	4.22064	DDX6;BTG2;WDR61;ENO1;HSPD1;EXOSC7;EXOSC5;EXOSC10;EXOSC4;EXOSC9;DCPS;EXOSC1;TTC37;CNOT6L;PABPC4;PABPC5;LSM1;LSM4;LSM3;LSM2;LSM8;LSM7;CNOT7;LSM6;PAN3;XRN1;CNOT1;SKIV2L;PABPC1;CNOT8;DCP2
Proteoglycans in cancer	73/205	0.0610316	0.190873	0	0	1.27029	3.5522	ITGB1;CDKN1A;ARAF;PIK3CB;TNF;ACTB;ACTG1;PPP1CB;CCND1;CTSL;CASP3;AKT3;KDR;ITGAV;RAC1;HRAS;VAV3;ARHGEF12;PPP1R12A;PDPK1;ITGA2;RPS6;WNT9B;RRAS2;ANK2;FRS2;ANK3;RHOA;CTTN;PIK3CA;HCLS1;ITGA5;RAF1;SOS1;HBEGF;CD63;CAMK2D;ROCK1;ROCK2;CAMK2A;ITPR2;PIK3R2;ITPR3;IQGAP1;PIK3R1;CBL;HIF1A;HOXD10;SLC9A1;CDC42;RRAS;ERBB4;PLCG2;FLNA;MAPK1;CAMK2G;TGFB2;RDX;STAT3;FN1;IGF2;FZD8;MSN;BRAF;PTPN11;ESR1;PTK2;MTOR;VEGFA;TF…
Progesterone-mediated oocyte maturation	38/100	0.0625043	0.193581	0	0	1.40676	3.90028	ANAPC13;HSP90AB1;ARAF;ADCY4;PIK3R2;ADCY2;PIK3R1;PIK3CB;ANAPC10;GNAI1;AURKA;GNAI2;CCNB2;MAPK9;CCNB1;FZR1;CDC23;CDC26;AKT3;CDC27;RPS6KA1;MAPK1;BUB1;PLK1;SPDYE4;BRAF;CDC25C;CCNA2;MOS;CCNA1;PIK3CA;CDC16;CDK1;PGR;KRAS;RAF1;CPEB4;MAD2L1
Thyroid cancer	16/37	0.0668484	0.204976	0	0	1.74757	4.72774	NTRK1;TCF7L2;CDKN1A;TCF7L1;GADD45B;GADD45A;BRAF;DDB2;GADD45G;CCND1;TPR;MAPK1;KRAS;PPARG;POLK;HRAS
Viral carcinogenesis	72/203	0.0674687	0.204976	0	0	1.26234	3.40338	RB1;ATF2;CDKN1A;GTF2H2C;DDX3X;GTF2B;PIK3CB;CDC20;CCND2;CCND1;CASP3;CHEK1;EP300;RAC1;SKP2;CCR4;HRAS;YWHAH;USP7;HLA-B;MRPS18B;ACTN4;HLA-A;TRAF1;HLA-F;HLA-G;RHOA;HLA-E;CCNA2;CCNA1;CREB3;PKM;PIK3CA;CCNE1;MAPKAPK2;VDAC3;IL6ST;IRF9;ATF4;RBPJL;GTF2A1;GTF2A2;HDAC1;PIK3R2;PIK3R1;HDAC8;HDAC9;RELA;GTF2E2;CDC42;SCIN;MAPK1;GTF2H2C_2;RANBP1;CREBBP;JUN;GSN;CDKN2A;BAD;STAT3;EIF2AK2;GTF2H2;GTF2H4;NFKBIA;DLG1;HNRN…
Axon guidance	65/182	0.0696741	0.208549	0	0	1.27578	3.39859	EPHB6;SEMA5A;ITGB1;ROBO2;GSK3B;NRP1;PIK3CB;PPP3CA;CFL2;BOC;RAC2;RAC3;RAC1;EPHB2;HRAS;NEO1;NCK1;SEMA6B;EPHA6;SEMA6A;ARHGEF12;UNC5B;DCC;PDPK1;RHOA;ENAH;PIK3CA;PARD3;RASA1;RAF1;SEMA7A;CAMK2D;ROCK1;ROCK2;CAMK2A;SEMA3G;PIK3R2;PIK3R1;EFNA5;EFNA4;NTN1;MYL12A;GNAI1;MYL12B;GNAI2;CDC42;EFNB1;PPP3R1;ABLIM1;RRAS;PLCG2;MAPK1;SRGAP2;SRGAP1;CAMK2G;PAK2;SEMA4A;SEMA4D;NFATC2;PTPN11;PTK2;CDK5;FES;PLXNB2;KRAS
PD-L1 expression and PD-1 checkpoint pathway in cancer	34/89	0.0699521	0.208549	0	0	1.41866	3.77355	PTEN;PIK3R2;PIK3CB;PIK3R1;CD3D;HIF1A;RELA;IKBKB;PPP3CA;PPP3R1;AKT3;MAPK1;HRAS;MAP2K6;MAP2K3;JUN;TICAM2;CSNK2A1;STAT1;IFNGR2;CSNK2A2;STAT3;NFATC2;PTPN11;TICAM1;MTOR;NFKBIA;IFNG;PIK3CA;RPS6KB1;CSNK2B;KRAS;RAF1;MYD88
NF-kappa B signaling pathway	39/104	0.0720049	0.212681	0	0	1.37708	3.62312	CD40;CXCL8;LY96;XIAP;BCL10;CXCL3;TNF;RELA;ICAM1;TNFSF13B;RELB;IKBKB;PLCG2;TRIM25;RIPK1;ERC1;MAP3K7;PIAS4;CARD10;TICAM2;UBE2I;CSNK2A1;GADD45B;TNFSF14;GADD45A;DDX58;CSNK2A2;IRAK4;TRAF1;TICAM1;GADD45G;TNFRSF1A;NFKBIA;CD40LG;CSNK2B;ATM;TAB2;MYD88;BIRC3
Fatty acid degradation	18/43	0.0732231	0.214295	0	0	1.65152	4.31748	ACADVL;CPT1A;ACAA2;ECHS1;ECI2;ACSL5;ACSL3;ACAT2;ADH5;ACAT1;ALDH3A2;HADHB;HADHA;ACOX1;HADH;ACADS;ALDH7A1;ALDH9A1
Nicotinate and nicotinamide metabolism	15/35	0.0802957	0.232858	0	0	1.7201	4.33816	NNMT;SIRT4;SIRT5;NMNAT3;NADSYN1;SIRT1;SIRT2;NT5E;PNP;NMNAT1;NMRK2;NAPRT;NAMPT;CD38;ENPP3
Glycosaminoglycan degradation	9/19	0.0898867	0.258323	0	0	2.06356	4.97155	HGSNAT;NAGLU;IDUA;HEXB;HYAL2;HEXA;HYAL3;GUSB;SGSH
Pyruvate metabolism	19/47	0.0923116	0.261735	0	0	1.55641	3.70829	FH;ACSS2;PDHA1;MDH1;MDH2;GLO1;AKR1A1;ACYP2;PDHB;ACAT2;ADH5;ACAT1;ALDH3A2;PKM;HAGH;ALDH7A1;DLD;LDHAL6A;ALDH9A1
Fc gamma R-mediated phagocytosis	36/97	0.0927148	0.261735	0	0	1.35422	3.22065	ARPC1B;ASAP3;PIK3R2;ASAP1;PIK3R1;PIK3CB;PLD1;CDC42;SCIN;CFL2;INPP5D;AKT3;PLCG2;RAC2;MAPK1;PIP5K1C;RAC1;WASF2;WASF3;VASP;VAV3;ACTR2;MARCKSL1;GSN;MYO10;SPHK2;PLA2G4A;ARPC4;PIK3CA;RPS6KB1;ARPC3;RAF1;PLPP2;CRK;DOCK1;PLPP1
Cysteine and methionine metabolism	20/50	0.0944122	0.261891	0	0	1.52914	3.6089	MPST;SDS;GOT1;MDH1;MDH2;GSS;GOT2;SDSL;SRM;TST;MAT2A;CBS;ADI1;PSAT1;CTH;PHGDH;BCAT1;ENOPH1;LDHAL6A;BCAT2
Vibrio cholerae infection	20/50	0.0944122	0.261891	0	0	1.52914	3.6089	ERO1A;ATP6V1A;SLC12A2;ATP6V0B;ATP6V1G1;ATP6V0E1;ATP6AP1;TCIRG1;ACTB;ACTG1;TJP1;SEC61G;PLCG2;GNAS;ATP6V0A4;SEC61B;KDELR3;ATP6V1E1;ATP6V0E2;ATP6V1C1
Notch signaling pathway	23/59	0.0991881	0.272767	0	0	1.46552	3.38643	PSENEN;TLE4;RBPJL;TLE3;TLE2;CREBBP;TLE1;JAG1;MAML2;CTBP2;MAML1;HDAC1;PSEN1;DTX4;NCOR2;APH1A;ADAM17;APH1B;HEY1;MFNG;NUMB;EP300;HES1
Chemokine signaling pathway	67/192	0.100121	0.27298	0	0	1.23057	2.832	GSK3B;GSK3A;CXCL8;ARRB2;PIK3CB;CXCL3;CX3CL1;CXCL16;IKBKB;PREX1;AKT3;RAC2;RAC3;RAC1;CCR4;HRAS;VAV3;RHOA;FGR;PIK3CA;PARD3;XCL2;RAF1;PLCB1;SOS1;CRK;CCL14;ROCK1;ROCK2;ADCY4;PIK3R2;ADCY2;PIK3R1;GNAI1;RELA;GNAI2;CDC42;GNG10;RAP1A;CCL8;GRK5;CXCR1;GNG5;GRK4;CCL5;GNG7;PLCG2;MAPK1;CCL18;CCL15;CCR1;BAD;STAT1;STAT2;STAT3;BRAF;GNG11;PTK2;GNG13;NFKBIA;CXCL11;GNAQ;GNB1;GNB4;KRAS;CCL28;BCAR1
Butanoate metabolism	2/28	0.111169	0.300532	0	0	1.71974	3.77778	HMGCL;HADHA;ECHS1;BDH2;OXCT1;ACSM1;GAD2;L2HGDH;HADH;ACADS;ACAT2;ACAT1
Lysine degradation	24/63	0.117138	0.314009	0	0	1.41153	3.02689	KMT2D;SETD2;ECHS1;PHYKPL;KMT2C;SETDB2;SETMAR;PLOD2;ASH1L;ACAT2;ACAT1;ALDH3A2;HADHA;HYKK;MECOM;SMYD2;KMT5B;KMT5A;SMYD3;HADH;ALDH7A1;DLD;EZH1;ALDH9A1
Chagas disease	37/102	0.118236	0.314311	0	0	1.30603	2.78846	C1QA;CXCL8;SERPINE1;PPP2R2A;PIK3R2;PIK3R1;PIK3CB;TNF;CD3D;KNG1;GNAI1;RELA;GNAI2;IKBKB;MAPK9;PPP2R1B;PPP2R1A;CCL5;AKT3;MAPK1;IL12A;FADD;JUN;TGFB2;NOS2;IFNGR2;IRAK4;TICAM1;TNFRSF1A;NFKBIA;IFNG;PIK3CA;GNAQ;GNAS;PLCB1;MYD88;C1QC
Propanoate metabolism	14/34	0.119877	0.316038	0	0	1.60516	3.40502	BCKDHA;ACSS2;ECHS1;BCKDHB;ACAT2;ACAT1;HADHA;ACOX1;DBT;PCCB;SUCLG1;ACADS;DLD;LDHAL6A
Aldosterone-regulated sodium reabsorption	15/37	0.123157	0.322024	0	0	1.5635	3.27444	PDPK1;INSR;PIK3R2;PIK3CB;PIK3R1;ATP1B1;NR3C2;SLC9A3R2;SCNN1G;FXYD4;PIK3CA;SCNN1B;MAPK1;KRAS;SGK1
Thyroid hormone signaling pathway	43/121	0.12845	0.333133	0	0	1.26492	2.59588	GSK3B;HDAC1;ATP2A3;ATP2A2;PIK3R2;PIK3R1;PIK3CB;MED16;HIF1A;ACTB;ACTG1;SLC9A1;CASP9;MED14;MED13;CCND1;AKT3;PLCG2;EP300;MAPK1;ITGAV;HRAS;MED1;CREBBP;PDPK1;BAD;STAT1;NCOA3;ATP1B1;MED27;ESR1;MTOR;BMP4;RCAN1;MED24;PIK3CA;RHEB;RCAN2;MDM2;KRAS;RAF1;PLCB1;MYH6
AGE-RAGE signaling pathway in diabetic complications	36/100	0.13303	0.34223	0	0	1.29046	2.6031	CXCL8;SERPINE1;PIK3R2;PIK3R1;PIK3CB;TNF;RELA;ICAM1;CDC42;THBD;MAPK9;CCND1;CASP3;AKT3;PLCG2;MAPK1;RAC1;HRAS;JUN;SMAD4;TGFB2;EDN1;SMAD3;STAT1;STAT3;FN1;SELE;VEGFA;DIAPH1;COL4A2;PIK3CA;CDK4;COL4A5;KRAS;PLCB1;NOX1
Autophagy	48/137	0.13726	0.350287	0	0	1.23752	2.45757	RAB1A;PRKAA1;MTMR3;PTEN;IRS2;PIK3R2;PIK3R1;PIK3CB;MTMR4;HIF1A;TANK;MAPK9;STK11;RRAS;CTSL;RB1CC1;AKT3;MLST8;MAPK1;NRBF2;MAP3K7;HRAS;RAB8A;SH3GLB1;IGBP1;GABARAPL2;UVRAG;PDPK1;BAD;EIF2AK3;RRAS2;TSC1;WIPI1;EIF2AK4;ATG14;MTOR;RAB33B;VMP1;PIK3CA;RPS6KB1;ATG16L1;RHEB;ATG2A;ULK2;ATG4B;KRAS;RAF1;SQSTM1
Allograft rejection	15/38	0.148728	0.376542	0	0	1.49542	2.84972	CD40;HLA-B;HLA-A;HLA-F;TNF;HLA-G;HLA-E;HLA-DMA;HLA-DMB;CD40LG;IFNG;HLA-DPB1;IL12A;HLA-DPA1;HLA-DQB1
Bladder cancer	16/41	0.150683	0.378486	0	0	1.46753	2.77742	RB1;CDKN1A;CXCL8;CDKN2A;MMP1;ARAF;BRAF;VEGFA;CCND1;CDK4;MDM2;MAPK1;KRAS;RAF1;HRAS;HBEGF
Arginine and proline metabolism	19/50	0.154273	0.379291	0	0	1.40549	2.6269	ARG2;GOT1;NOS2;SMOX;ODC1;GOT2;AZIN2;SAT2;SAT1;CNDP1;CNDP2;SRM;ALDH3A2;ALDH4A1;P4HA1;LAP3;CKB;ALDH7A1;ALDH9A1
Pyrimidine metabolism	21/56	0.155312	0.379291	0	0	1.37596	2.56247	DTYMK;DUT;RRM2;ENTPD4;NUDT2;NME4;TYMS;NME1;UCKL1;DCTD;NT5C3A;NT5E;PNP;NME6;NME7;CMPK1;CMPK2;TK2;ENPP3;UPP1;DCTPP1
Fc epsilon RI signaling pathway	25/68	0.155342	0.379291	0	0	1.33341	2.48297	PIK3R2;PIK3CB;PIK3R1;TNF;MAPK9;INPP5D;AKT3;RAC2;PLCG2;RAC3;MAPK1;RAC1;MAP2K7;HRAS;MAP2K6;MAP2K3;VAV3;PDPK1;IL13;PLA2G4A;PIK3CA;ALOX5AP;KRAS;RAF1;SOS1
Synthesis and degradation of ketone bodies	5/10	0.156895	0.379291	0	0	2.29216	4.2455	HMGCL;BDH2;OXCT1;ACAT2;ACAT1
Pantothenate and CoA biosynthesis	9/21	0.156948	0.379291	0	0	1.71939	3.18403	ALDH3A2;PANK2;PANK3;VNN1;PPCS;ENPP3;BCAT1;COASY;BCAT2
Ribosome biogenesis in eukaryotes	38/108	0.162703	0.390244	0	0	1.24527	2.2612	POP5;RBM28;POP7;NVL;POP4;RPP30;WDR3;HEATR1;FCF1;NMD3;SNU13;PWP2;AK6;NXT2;WDR43;NOL6;RRP7A;FBL;EMG1;XPO1;NOB1;BMS1;RPP38;NOP56;NOP58;CSNK2A1;UTP4;IMP3;CSNK2A2;IMP4;REXO2;RPP25L;LSG1;XRN1;EIF6;CSNK2B;NXF2B;NOP10
Rheumatoid arthritis	33/93	0.168515	0.401167	0	0	1.26152	2.24643	ATP6V1A;CXCL8;FLT1;CSF1;PTH;TCIRG1;CXCL3;TNF;ICAM1;TNFSF13B;HLA-DMA;HLA-DMB;CTSL;CCL5;CTLA4;ATP6V0A4;ATP6V1E1;ATP6V0E2;ATP6V1C1;HLA-DPA1;IL11;ATP6V0B;ATP6V1G1;JUN;TGFB2;ATP6V0E1;ATP6AP1;MMP1;VEGFA;IFNG;HLA-DPB1;HLA-DQB1;IL17A
Cardiac muscle contraction	31/87	0.170708	0.403378	0	0	1.26966	2.24451	COX7B;UQCRB;COX4I1;ATP2A3;ATP2A2;COX7A2;UQCR11;UQCR10;COX6A1;COX5B;COX7C;COX5A;COX7A1;UQCRH;SLC9A1;UQCRFS1;COX2;CACNG1;CYC1;COX8A;ATP1B1;COX6C;UQCRHL;COX6B1;SLC8A3;COX7A2L;UQCRQ;MYL2;UQCRC1;UQCRC2;MYH6
B cell receptor signaling pathway	29/81	0.172779	0.404079	0	0	1.27906	2.2457	GSK3B;IFITM1;CD81;PIK3R2;PIK3CB;BCL10;PIK3R1;RELA;LILRA5;IKBKB;PPP3CA;PPP3R1;INPP5D;AKT3;RAC2;PLCG2;RAC3;MAPK1;RAC1;HRAS;VAV3;CR2;JUN;NFATC2;NFKBIA;PIK3CA;KRAS;RAF1;SOS1
SNARE interactions in vesicular transport	13/33	0.173538	0.404079	0	0	1.49026	2.60998	STX19;STX8;GOSR1;STX7;USE1;BET1L;VAMP1;STX4;STX2;YKT6;STX1A;BET1;VAMP3
Melanoma	26/72	0.175553	0.405808	0	0	1.29624	2.25521	RB1;CDKN1A;ARAF;PTEN;PDGFB;PIK3R2;PIK3CB;PIK3R1;FGF7;CCND1;AKT3;MAPK1;POLK;HRAS;GADD45B;BAD;CDKN2A;GADD45A;BRAF;DDB2;GADD45G;PIK3CA;CDK4;MDM2;KRAS;RAF1
TNF signaling pathway	39/112	0.178045	0.408606	0	0	1.22546	2.1148	ATF2;CSF1;PIK3R2;PIK3R1;PIK3CB;CXCL3;TNF;CX3CL1;RELA;ICAM1;RPS6KA4;IKBKB;MAPK9;CASP3;CCL5;AKT3;MAPK1;RIPK1;FADD;MAP2K7;MAP3K7;MAP2K6;MAP2K3;JUN;EDN1;JAG1;MLKL;DAB2IP;TRAF1;TNFRSF1B;SELE;TNFRSF1A;NFKBIA;CREB3;ITCH;PIK3CA;TAB2;ATF4;BIRC3
TGF-beta signaling pathway	33/94	0.187149	0.426432	0	0	1.24075	2.07932	ROCK1;ZFYVE9;CUL1;TNF;LTBP1;ACVR1C;PPP2R1B;PPP2R1A;EP300;MAPK1;NEO1;SKP1;ACVR1;SMAD1;CREBBP;SMAD4;TGFB2;SMAD3;SMURF2;INHBB;INHBA;SMAD6;RHOA;ACVR2A;RBX1;GREM1;BMP4;BMP2;IFNG;RPS6KB1;ID2;ID1;ID3
Histidine metabolism	9/22	0.197464	0.440285	0	0	1.58701	2.57446	ALDH3A2;CARNMT1;HDC;HNMT;ALDH7A1;CNDP1;FTCD;CNDP2;ALDH9A1
T cell receptor signaling pathway	36/104	0.201078	0.440285	0	0	1.2142	1.94766	GSK3B;CBLB;PIK3R2;BCL10;PIK3R1;PIK3CB;TNF;CD3D;RELA;IKBKB;CDC42;PPP3CA;MAPK9;PPP3R1;AKT3;CTLA4;MAPK1;MAP2K7;MAP3K7;HRAS;PAK2;NCK1;VAV3;JUN;PDPK1;NFATC2;RHOA;NFKBIA;DLG1;CD40LG;IFNG;PIK3CA;CDK4;KRAS;RAF1;SOS1
Toll-like receptor signaling pathway	36/104	0.201078	0.440285	0	0	1.2142	1.94766	CD40;CXCL8;IFNA2;LY96;PIK3R2;PIK3R1;PIK3CB;TNF;RELA;IKBKB;MAPK9;CCL5;AKT3;SPP1;MAPK1;IL12A;RIPK1;FADD;RAC1;MAP2K7;MAP3K7;IFNA21;MAP2K6;MAP2K3;IFNA13;JUN;TICAM2;STAT1;IRAK4;TICAM1;NFKBIA;CXCL11;PIK3CA;TOLLIP;TAB2;MYD88
Riboflavin metabolism	4/8	0.201109	0.440285	0	0	2.29195	3.67607	BLVRB;ACP2;ENPP3;ACP1
Sulfur relay system	4/8	0.201109	0.440285	0	0	2.29195	3.67607	MPST;MOCS2;NFS1;TST
Oocyte meiosis	44/129	0.203164	0.440285	0	0	1.18734	1.89231	ANAPC13;CAMK2D;CAMK2A;CUL1;ADCY4;ITPR2;ITPR3;ADCY2;SMC3;ANAPC10;AURKA;CDC20;PPP1CB;CCNB2;PPP3CA;CCNB1;PPP3R1;CDC23;SLK;PPP2R1B;PTTG1;PPP2R1A;PPP2R5E;CDC26;CDC27;RPS6KA1;MAPK1;BUB1;CAMK2G;SKP1;YWHAH;PLK1;SPDYE4;CDC25C;SMC1A;RBX1;MOS;CCNE1;CDC16;CDK1;PGR;CALM1;CPEB4;MAD2L1
Glycerophospholipid metabolism	34/98	0.204893	0.440285	0	0	1.21837	1.93144	DGKG;CDS1;ACHE;DGKD;DGKA;LCAT;PLD1;TAZ;AGPAT3;AGPAT4;PTDSS1;CEPT1;CDIPT;LYPLA2;LYPLA1;PLA2G12A;CHKB;PLA2G2A;MBOAT1;PLA2G4A;PISD;PLA2G15;GNPAT;LPCAT4;DGKQ;LPCAT3;LPCAT2;PEMT;PNPLA6;LPIN1;PLPP2;LPIN2;PLPP1;DGKH
mRNA surveillance pathway	34/98	0.204893	0.440285	0	0	1.21837	1.93144	SMG1;RBM8A;RNMT;CSTF2T;PPP2R2A;MSI2;NXT2;GLE1;PPP1CB;PPP2R1B;PABPN1;CLP1;PPP2R1A;PPP2R5E;PPP2R3C;MAGOH;PELO;UPF1;CPSF6;CPSF1;ALYREF;PABPC4;PABPC5;SSU72;UPF3A;PPP2R3B;PPP2R3A;MAGOHB;SRRM1;WDR33;NUDT21;NXF2B;ETF1;PABPC1
RNA polymerase	12/31	0.20565	0.440285	0	0	1.44789	2.28996	POLR2J3;POLR2J2;POLR3B;POLR2C;POLR2D;POLR3F;POLR3H;POLR2H;POLR2I;POLR2J;POLR2K;POLR2L
MAPK signaling pathway	96/294	0.214469	0.455837	0	0	1.11261	1.71297	ATF2;FLT1;CSF1;FLT4;RASGRF2;RASGRF1;ARAF;HSPB1;ARRB2;TNF;DUSP16;ELK4;RPS6KA4;IKBKB;PPP3CA;FGF7;MECOM;CASP3;AKT3;RPS6KA1;STMN1;KDR;RAC2;RAC3;RAC1;HRAS;MAP3K7;DUSP4;MAP2K3;MAP4K2;DUSP3;DUSP1;FLT3LG;RRAS2;PLA2G4A;IRAK4;MAPK8IP3;DUSP6;MAPK8IP1;TNFRSF1A;PPM1A;PPM1B;RASA1;MAPKAPK2;RAPGEF2;RAF1;SOS1;CRK;ATF4;PDGFB;TGFA;EFNA5;EFNA4;RELA;CACNA1H;RELB;STK3;CDC42;MAPK9;PPP3R1;RAP1A;MAPK7;RRAS;ERBB4;MKNK1;FL…
Tuberculosis	60/180	0.215773	0.455837	0	0	1.147	1.75896	ITGAM;CLEC4M;IFNA2;TCIRG1;TNF;CTSS;CASP9;EEA1;MRC2;PPP3CA;CASP3;AKT3;EP300;IL12A;HLA-DPA1;IFNA13;ATP6V0B;ARHGEF12;ATP6AP1;KSR1;SPHK2;IFNGR2;IRAK4;RHOA;TNFRSF1A;IFNG;RFX5;RAF1;HLA-DQB1;CAMK2D;CAMK2A;BCL10;RELA;HSPD1;MAPK9;PPP3R1;HLA-DMA;HLA-DMB;MAPK1;ATP6V0A4;FADD;BID;CAMK2G;IFNA21;PLK3;CREBBP;TGFB2;NOS2;BAD;STAT1;NFYC;CARD9;RFXANK;RFXAP;HLA-DPB1;CYCS;CALM1;RAB5A;FCGR2C;MYD88
Longevity regulating pathway	35/102	0.222781	0.467548	0	0	1.19798	1.79885	ATF2;PRKAA1;CLPB;HDAC1;PRKAG1;ADCY4;IRS2;PIK3R2;ADCY2;PIK3R1;PIK3CB;ADIPOR1;RELA;STK11;RB1CC1;AKT3;HRAS;HSPA8;PRKAB2;INSR;TSC1;HSPA2;SOD2;SIRT1;MTOR;SOD1;CREB3;PIK3CA;RPS6KB1;RHEB;PPARG;KRAS;HSPA1B;ATF4;HSPA1A
Apelin signaling pathway	46/137	0.233468	0.483611	0	0	1.15934	1.68651	MYLK2;PRKAA1;SERPINE1;PRKAG1;ADCY4;ITPR2;ITPR3;ADCY2;GNAI1;MYLK4;SLC9A1;GNAI2;GNA13;GNG10;CCND1;RRAS;GNG5;GNG7;AKT3;SPP1;MAPK1;HRAS;MEF2A;GABARAPL2;PRKAB2;SMAD4;MEF2B;JAG1;SMAD3;NOS2;SPHK2;RPS6;RRAS2;GNG11;MTOR;GNG13;SLC8A3;RPS6KB1;MYL2;GNAQ;GNB1;GNB4;KRAS;RAF1;CALM1;PLCB1
Insulin signaling pathway	46/137	0.233468	0.483611	0	0	1.15934	1.68651	GSK3B;PRKAA1;ARAF;PRKAG1;CBLB;IRS2;PIK3R2;PIK3R1;PIK3CB;CBL;PTPRF;HK1;PPP1CB;IKBKB;MAPK9;PRKAR2A;MKNK1;AKT3;PHKG2;FLOT1;FLOT2;MAPK1;HRAS;SREBF1;PTPN1;PRKAB2;PDPK1;BAD;INSR;RPS6;TSC1;BRAF;PHKB;SORBS1;MTOR;G6PC3;PIK3CA;RPS6KB1;PRKAR1A;RHEB;KRAS;RAF1;CALM1;SOS1;CRK;RHOQ
Mismatch repair	9/23	0.241793	0.496819	0	0	1.47355	2.09196	RFC5;POLD4;PCNA;RFC4;RFC1;RPA3;POLD2;RPA4;SSBP1
Glycosylphosphatidylinositol (GPI)-anchor biosynthesis	10/26	0.242959	0.496819	0	0	1.43265	2.027	DPM2;PIGU;PGAP1;PIGO;GPAA1;PIGP;PIGW;PIGV;PIGY;PIGX
Long-term depression	21/60	0.258389	0.525008	0	0	1.23448	1.6706	GUCY1A2;GNAZ;GRID2;ARAF;PLA2G4A;ITPR2;ITPR3;BRAF;GRM1;GNAI1;GNAI2;GNA13;PPP2R1B;PPP2R1A;GNAQ;GNAS;MAPK1;KRAS;PLCB1;RAF1;HRAS
cGMP-PKG signaling pathway	55/167	0.260721	0.526393	0	0	1.12624	1.514	ATF2;MYLK2;ATP2A3;ATP2A2;IRS2;ADRA1B;MYLK4;NPPB;PPP1CB;NPPC;PPP3CA;EDNRB;AKT3;GTF2I;MEF2A;GUCY1A2;MEF2B;PPP1R12A;ATP1B1;RHOA;CREB3;PPIF;VDAC3;VDAC2;VDAC1;RAF1;PLCB1;SLC25A5;SLC25A4;MYH6;ATF4;SLC25A6;ROCK1;ROCK2;ADCY4;ITPR2;ADRB1;ITPR3;ADCY2;KNG1;GNAI1;GNAI2;GNA13;PPP3R1;MAPK1;VASP;BAD;INSR;PDE2A;NFATC2;SLC8A3;GNAQ;PDE3A;GTF2IRD1;CALM1
Phenylalanine, tyrosine and tryptophan biosynthesis	3/6	0.26283	0.527313	0	0	2.29174	3.06232	GOT1;PAH;GOT2
Amino sugar and nucleotide sugar metabolism	17/48	0.269503	0.535773	0	0	1.25713	1.64831	GPI;HEXB;UXS1;HEXA;PMM2;HK1;CYB5R1;CYB5R3;UGP2;GNPDA1;NAGK;AMDHD2;FPGT;UAP1L1;GNPNAT1;NANS;GALK1
Pertussis	26/76	0.270406	0.535773	0	0	1.19219	1.55919	ITGB1;C1QA;CXCL8;ITGAM;LY96;C4BPB;TNF;GNAI1;RELA;GNAI2;PYCARD;MAPK9;CASP3;CFL2;MAPK1;IL12A;JUN;TICAM2;NOS2;IRAK4;TICAM1;RHOA;ITGA5;CALM1;MYD88;C1QC
Central carbon metabolism in cancer	24/70	0.277089	0.545625	0	0	1.19613	1.53513	NTRK1;G6PD;PDHA1;IDH1;IDH2;PTEN;PIK3R2;PIK3CB;PDHB;PIK3R1;SLC1A5;HIF1A;MTOR;HK1;SLC7A5;PKM;PIK3CA;AKT3;MAPK1;KRAS;RAF1;HRAS;SLC16A3;LDHAL6A
Long-term potentiation	23/67	0.280541	0.549034	0	0	1.19837	1.52317	CAMK2D;CREBBP;CAMK2A;ARAF;ITPR2;ITPR3;BRAF;GRM1;PPP1CB;PPP3CA;PPP3R1;RAP1A;GNAQ;RPS6KA1;EP300;MAPK1;KRAS;PLCB1;RAF1;CALM1;HRAS;CAMK2G;ATF4
Base excision repair	12/33	0.282902	0.550279	0	0	1.30981	1.65384	POLE4;SMUG1;POLD4;MBD4;FEN1;PARP3;PCNA;PARP4;APEX1;POLD2;XRCC1;POLE
beta-Alanine metabolism	11/30	0.285258	0.5515	0	0	1.32702	1.66456	ALDH3A2;HADHA;ECHS1;SMOX;ACOX1;GAD2;ACADS;ALDH7A1;CNDP1;CNDP2;ALDH9A1
Collecting duct acid secretion	10/27	0.28737	0.552234	0	0	1.34828	1.68128	ATP6V1A;ATP6V1G1;ATP6V0E1;CA2;ATP6V0A4;TCIRG1;ATP6V0E2;ATP6V1E1;SLC12A7;ATP6V1C1
Thiamine metabolism	6/15	0.289741	0.553457	0	0	1.52792	1.89274	NFS1;ALPP;AK1;AK2;NTPCR;ACP1
Leishmaniasis	26/77	0.296809	0.563584	0	0	1.16873	1.41962	ITGB1;ITGAM;TNF;RELA;HLA-DMA;HLA-DMB;MAPK1;IL12A;MAP3K7;HLA-DPA1;JUN;MARCKSL1;TGFB2;NOS2;STAT1;IFNGR2;CYBA;IRAK4;NFKBIA;IFNG;EEF1A2;HLA-DPB1;TAB2;FCGR2C;MYD88;HLA-DQB1
Mitophagy	23/68	0.309161	0.583563	0	0	1.17166	1.3754	GABARAPL2;JUN;CSNK2A1;CSNK2A2;EIF2AK3;RRAS2;HIF1A;RELA;MAPK9;RHOT1;RRAS;UBB;CSNK2B;UBC;TAX1BP1;TOMM7;KRAS;RPS27A;TBC1D17;HRAS;SQSTM1;UBA52;ATF4
Type I diabetes mellitus	15/43	0.311261	0.584072	0	0	1.22794	1.43315	HLA-B;GAD2;HLA-A;HLA-F;TNF;HLA-G;HSPD1;HLA-E;HLA-DMA;HLA-DMB;IFNG;HLA-DPB1;IL12A;HLA-DPA1;HLA-DQB1
Growth hormone synthesis, secretion and action	39/119	0.316317	0.590089	0	0	1.11767	1.28644	ATF2;GSK3B;CSH2;ADCY4;ITPR2;IRS2;ITPR3;PIK3R2;ADCY2;PIK3R1;PIK3CB;GNAI1;GNAI2;MAPK9;AKT3;PLCG2;EP300;MAPK1;HRAS;MAP2K6;MAP2K3;CREBBP;MAP3K1;STAT1;STAT3;PTK2;MTOR;CREB3;PIK3CA;GNAQ;GHRH;GNAS;KRAS;RAF1;PLCB1;SOS1;CRK;BCAR1;ATF4
African trypanosomiasis	13/37	0.319934	0.593367	0	0	1.24153	1.41489	LAMA4;TNF;SELE;KNG1;ICAM1;IFNG;GNAQ;F2RL1;IL12A;APOL1;IDO2;PLCB1;MYD88
Phosphatidylinositol signaling system	32/97	0.322881	0.59537	0	0	1.1286	1.27585	DGKG;CDS1;MTMR1;MTMR2;DGKD;MTMR3;INPP1;DGKA;PTEN;ITPR2;ITPR3;PIK3R2;PIK3C2G;PIK3R1;PIK3CB;MTMR4;MTMR6;PPIP5K2;INPP5D;PLCG2;PIP4K2A;PIP5K1C;IP6K1;CDIPT;IP6K2;SYNJ2;ITPKC;PIK3CA;DGKQ;CALM1;PLCB1;DGKH
Adipocytokine signaling pathway	23/69	0.338618	0.620799	0	0	1.1461	1.24109	CPT1A;PRKAB2;PRKAA1;STAT3;PRKAG1;ACSL5;IRS2;PTPN11;ACSL3;TNFRSF1B;ADIPOR1;TNF;RELA;MTOR;TNFRSF1A;IKBKB;NFKBIA;POMC;MAPK9;STK11;G6PC3;NPY;AKT3
Arginine biosynthesis	8/22	0.343388	0.625947	0	0	1.30961	1.39983	ARG2;GLUD2;GOT1;NOS2;GPT2;GOT2;ASL;GLUL
Necroptosis	51/159	0.348952	0.632476	0	0	1.0826	1.13978	HSP90AB1;FAF1;IFNA2;TNF;PYCARD;FTH1;TNFSF10;CAPN1;GLUL;IFNA13;TICAM2;IFNGR2;PLA2G4A;TICAM1;TNFRSF1A;IFNG;CHMP4C;VDAC3;CHMP4B;VDAC2;VDAC1;RBCK1;SLC25A5;PPIA;SQSTM1;CHMP7;SLC25A4;PPID;IRF9;FTL;BIRC3;CHMP5;SLC25A6;CAMK2D;CAMK2A;XIAP;MAPK9;RIPK1;TRPM7;FADD;BID;CAMK2G;IFNA21;MLKL;STAT1;STAT2;STAT3;EIF2AK2;GLUD2;CHMP2B;CHMP2A
Platelet activation	40/124	0.356499	0.640795	0	0	1.0916	1.1259	ITGB1;MYLK2;ROCK1;ROCK2;ADCY4;ITPR2;ITPR3;PIK3R2;ADCY2;PIK3R1;PIK3CB;ACTB;ARHGAP35;MYL12A;GNAI1;ACTG1;MYLK4;MYL12B;GNAI2;PPP1CB;GNA13;RAP1A;AKT3;PLCG2;MAPK1;VASP;GUCY1A2;ARHGEF12;PPP1R12A;VWF;ITGA2;PLA2G4A;RHOA;PIK3CA;GNAQ;GNAS;ORAI1;TLN1;PLCB1;FERMT3
Insulin resistance	35/108	0.35756	0.640795	0	0	1.09904	1.13031	GSK3B;PRKAA1;PRKAG1;PTEN;IRS2;PIK3R2;PIK3R1;PIK3CB;TNF;PTPRF;RELA;PPP1CB;IKBKB;MAPK9;AKT3;RPS6KA1;MLXIP;SREBF1;PTPN1;CPT1A;PRKAB2;PDPK1;INSR;NR1H2;STAT3;PTPN11;MTOR;TNFRSF1A;NFKBIA;CREB3;G6PC3;PIK3CA;RPS6KB1;SLC27A6;SLC27A2
Fanconi anemia pathway	18/54	0.366752	0.649857	0	0	1.14598	1.1495	TOP3B;WDR48;SLX1B;REV1;FAAP24;PALB2;RAD51C;RAD51;FANCD2;ERCC1;RPA3;UBE2T;RPA4;REV3L;POLI;SLX1A;HES1;POLK
Amoebiasis	33/102	0.367826	0.649857	0	0	1.09627	1.09642	CXCL8;ITGAM;LAMA2;LAMA4;HSPB1;PIK3R2;PIK3R1;LAMC1;PIK3CB;CXCL3;TNF;C8A;RELA;PRDX1;CASP3;IL12A;TGFB2;ARG2;NOS2;LAMB4;FN1;SERPINB9;LAMB1;ACTN4;PTK2;COL4A2;IFNG;PIK3CA;GNAQ;GNAS;COL4A5;PLCB1;RAB5A
RIG-I-like receptor signaling pathway	23/70	0.368728	0.649857	0	0	1.12164	1.11905	OTUD5;IFNA13;CXCL8;DDX3X;MAP3K1;DDX58;IFNA2;ISG15;TNF;TANK;RELA;IKBKB;NFKBIA;MAPK9;MAVS;IFNE;TRIM25;PIN1;IL12A;RIPK1;FADD;MAP3K7;IFNA21
Parathyroid hormone synthesis, secretion and action	34/106	0.387415	0.675997	0	0	1.08237	1.02636	ATF2;CDKN1A;PTH;ARAF;ADCY4;ITPR2;ITPR3;ADCY2;ARRB2;PLD1;GNAI1;GNAI2;LRP6;GNA13;SLC9A3R1;AKAP13;BGLAP;MAPK1;MEF2A;ARHGEF11;CASR;JUND;PDE4C;BRAF;RHOA;CREB3;MMP13;MMP15;GNAQ;GNAS;RAF1;PLCB1;ATF4;HBEGF
Cell adhesion molecules	47/148	0.387798	0.675997	0	0	1.06667	1.01043	ITGB1;CNTNAP2;CD40;ITGAM;SELPLG;SDC3;ICAM2;PTPRM;NRXN2;F11R;CLDN1;GLG1;PTPRF;ICAM1;HLA-DMA;ALCAM;HLA-DMB;CLDN23;CTLA4;ITGAV;CD58;NCAM2;CD34;NEO1;ICOSLG;CD99;MPZL1;CD276;HLA-DPA1;CADM3;NEGR1;HLA-B;HLA-A;PDCD1LG2;HLA-F;HLA-G;SELE;HLA-E;CLDN11;CLDN5;CLDN10;CD40LG;CNTN1;HLA-DPB1;CLDN18;ITGA6;HLA-DQB1
Tryptophan metabolism	14/42	0.39428	0.683562	0	0	1.14588	1.06647	TPH1;ECHS1;KMO;ACAT2;ACAT1;ALDH3A2;HADHA;AANAT;AFMID;HADH;IDO2;ALDH7A1;DLD;ALDH9A1
One carbon pool by folate	7/20	0.406761	0.701387	0	0	1.23394	1.10996	ATIC;MTHFD2;ST20-MTHFS;MTHFR;TYMS;ALDH1L2;FTCD
Nitrogen metabolism	6/17	0.416927	0.707646	0	0	1.24994	1.0935	CA1;GLUD2;CA2;CA4;GLUL;CA13
Primary bile acid biosynthesis	6/17	0.416927	0.707646	0	0	1.24994	1.0935	CYP27A1;CYP39A1;CH25H;AMACR;SCP2;HSD17B4
Sphingolipid metabolism	16/49	0.417045	0.707646	0	0	1.11113	0.971748	CERS5;ASAH1;CERK;SPHK2;GALC;UGCG;NEU4;SGPL1;SPTLC1;NEU1;DEGS1;KDSR;PLPP2;GLA;PLPP1;CERS2
Transcriptional misregulation in cancer	60/192	0.42358	0.712801	0	0	1.04182	0.894937	ATF1;CD40;CDKN1A;CCNT2;CXCL8;FLT1;ITGAM;CCNT1;JMJD1C;BMI1;AFF1;HOXA11;ELK4;CCND2;POLK;MEN1;LMO2;TRAF1;DUSP6;MLF1;DDB2;ETV6;CCNA2;CCNA1;ZEB1;PAX7;BMP2K;RARA;COMMD3-BMI1;PPARG;ERG;NUPR1;BIRC3;HDAC1;MLLT1;RELA;TSPAN7;NTRK1;SMAD1;ARNT2;TAF15;GADD45B;JUP;GADD45A;DEFA4;ZBTB16;ASPSCR1;DEFA3;PBX1;PTK2;PML;GADD45G;MEIS1;BCL6;WT1;ID2;MDM2;REL;ATM;TCF3
Wnt signaling pathway	52/166	0.424552	0.712801	0	0	1.04545	0.895659	GSK3B;CHD8;PPP3CA;CCND2;CCND1;SOX17;RAC2;EP300;RAC3;RAC1;RSPO1;MAP3K7;CER1;SKP1;TLE4;APC2;TLE3;TLE2;TLE1;CSNK2A1;CSNK2A2;WNT9B;CACYBP;CSNK1E;SENP2;RHOA;RBX1;DAAM1;TBL1XR1;CSNK2B;PLCB1;CAMK2D;CTBP2;ROCK2;CAMK2A;CUL1;PSEN1;PRICKLE1;LRP6;MAPK9;PORCN;PPP3R1;CAMK2G;TCF7L2;CREBBP;JUN;SMAD4;TCF7L1;SMAD3;FZD8;NFATC2;APC
Fat digestion and absorption	14/43	0.434359	0.725447	0	0	1.10629	0.92252	SCARB1;PLA2G12A;DGAT2;MOGAT3;DGAT1;GOT2;PLA2G2A;APOA4;CEL;ACAT2;ACAT1;PLPP2;PLPP1;PNLIP
Autoimmune thyroid disease	17/53	0.445296	0.739841	0	0	1.08214	0.875465	CD40;IFNA13;IFNA2;HLA-B;HLA-A;HLA-F;HLA-G;HLA-E;HLA-DMA;HLA-DMB;CD40LG;HLA-DPB1;CTLA4;TSHB;HLA-DPA1;HLA-DQB1;IFNA21
Pancreatic secretion	32/102	0.450949	0.742852	0	0	1.04761	0.834317	PRSS1;CELA3B;RAB3D;ATP2A3;ADCY4;ITPR2;ATP2A2;ITPR3;ADCY2;SLC4A2;SLC9A1;RAP1A;CA2;CD38;RAC1;RAB8A;CPA3;SLC12A2;PLA2G12A;AMY1A;CTRB2;AMY1C;PLA2G2A;CEL;ATP1B1;RHOA;RAB11A;TPCN2;GNAQ;GNAS;PLCB1;PNLIP
Vitamin digestion and absorption	8/24	0.451798	0.742852	0	0	1.14574	0.910314	SCARB1;ABCC1;BTD;TCN2;AWAT2;APOA4;PNLIP;SLC19A1
Alanine, aspartate and glutamate metabolism	12/37	0.454094	0.742852	0	0	1.09992	0.868335	ALDH4A1;GLUD2;GOT1;GPT2;GOT2;ASNS;GAD2;ASL;AGXT;GLUL;NIT2;ASRGL1
Mineral absorption	19/60	0.462626	0.752947	0	0	1.06192	0.818569	MT1M;CYBRD1;MT1X;ATP1B1;ATOX1;SLC8A3;MT2A;MT1A;HEPHL1;FTH1;MT1F;MT1G;MT1H;TRPM7;MT1B;SLC39A4;SLC26A6;FTL;MT1E
Purine metabolism	40/129	0.471848	0.756592	0	0	1.0299	0.773558	PRPS2;PRPS1;GMPR2;AK1;AK2;ADCY4;NUDT2;AK3;GMPR;ADCY2;NTPCR;NUDT5;AK6;PFAS;PAPSS1;DGUOK;NT5E;PNP;ATIC;GUK1;ENPP3;GUCY1A2;ENTPD2;RRM2;ENTPD4;PDE2A;PDE4C;NME4;APRT;NME1;NT5C3A;PKM;NME6;NME7;IMPDH2;PDE3A;HPRT1;PDE7B;ADA;ITPA
Relaxin signaling pathway	40/129	0.471848	0.756592	0	0	1.0299	0.773558	ATF2;ADCY4;PIK3R2;ADCY2;PIK3R1;ARRB2;PIK3CB;GNAI1;RELA;GNAI2;MAPK9;GNG10;EDNRB;GNG5;GNG7;AKT3;MAPK1;MAP2K7;HRAS;JUN;EDN1;NOS2;MMP1;GNG11;GNG13;VEGFA;NFKBIA;CREB3;MMP13;COL4A2;PIK3CA;GNB1;GNAS;GNB4;COL4A5;KRAS;RAF1;PLCB1;SOS1;ATF4
GnRH signaling pathway	29/93	0.472375	0.756592	0	0	1.03834	0.778734	CAMK2D;CAMK2A;ADCY4;ITPR2;ADCY2;ITPR3;PLD1;CDC42;MAPK9;MAPK7;MAPK1;MAP2K7;HRAS;CAMK2G;MAP2K6;MAP2K3;JUN;MAP3K1;FSHB;PLA2G4A;GNAQ;GNAS;KRAS;PLCB1;RAF1;SOS1;CALM1;ATF4;HBEGF
Vasopressin-regulated water reabsorption	14/44	0.474352	0.756592	0	0	1.06934	0.797518	DCTN6;NSF;DYNC1H1;DYNLL1;DYNLL2;RAB11A;RAB11B;CREB3;DYNC1LI2;ARHGDIB;GNAS;STX4;RAB5A;DYNC1I1
Asthma	10/31	0.477157	0.757279	0	0	1.09115	0.807351	CD40;HLA-DMA;HLA-DMB;CD40LG;IL13;IL9;HLA-DPB1;TNF;HLA-DPA1;HLA-DQB1
Homologous recombination	13/41	0.485359	0.766483	0	0	1.06386	0.769029	TOP3B;PALB2;BABAM1;POLD4;RAD50;RAD51;RAD51C;RPA3;POLD2;RPA4;ATM;SSBP1;SYCP3
Glucagon signaling pathway	33/107	0.495536	0.778699	0	0	1.02182	0.717439	ATF2;CAMK2D;PRKAA1;CAMK2A;PRKAG1;ITPR2;ITPR3;ADCY2;PDHB;PPP3CA;PPP3R1;AKT3;PHKG2;EP300;CAMK2G;CPT1A;PRKAB2;CREBBP;PDHA1;PPP4R3A;PHKB;PPP4R3B;SIRT1;CREB3;G6PC3;PKM;GNAQ;GNAS;SIK1;CALM1;PLCB1;LDHAL6A;ATF4
PI3K-Akt signaling pathway	108/354	0.499984	0.780937	0	0	1.00595	0.697306	ATF2;CSF3;CSF3R;CSF1;PPP2R2A;FGF7;STK11;CCND2;PPP2R1B;CCND1;PPP2R1A;AKT3;KDR;TNR;IL6R;MAGI1;IFNA13;RPS6;FLT3LG;TSC1;COL4A2;CCNE1;CDC37;COL4A5;RAF1;ATF4;CSH2;PDGFB;TGFA;PIK3R2;PIK3R1;EFNA5;EFNA4;HSP90B1;GNG10;IFNA21;INSR;FN1;IGF2;GNG11;PTK2;GNG13;G6PC3;LPAR6;CDK4;IL7;RHEB;GNB1;GNB4;MDM2;ITGB1;GSK3B;CDKN1A;FLT1;HSP90AB1;FLT4;IFNA2;PTEN;LAMC1;PIK3CB;IKBKB;CASP9;PPP2R5E;MLST8;ITGAV;RAC1;HRAS;YWHAH;VW…
Osteoclast differentiation	39/127	0.501856	0.780937	0	0	1.01547	0.700109	CSF1;PIK3R2;PIK3R1;PIK3CB;TNF;RELA;LILRA5;RELB;IKBKB;PPP3CA;MAPK9;PPP3R1;AKT3;PLCG2;SIRPA;MAPK1;RAC1;MAP2K7;MAP3K7;MAP2K6;JUN;TGFB2;JUND;STAT1;IFNGR2;STAT2;NFATC2;CYBA;TNFRSF1A;NFKBIA;IFNG;PIK3CA;FOSB;TAB2;PPARG;SQSTM1;FCGR2C;NOX1;IRF9
ABC transporters	14/45	0.513871	0.787817	0	0	1.03477	0.688932	ABCD4;ABCA2;ABCC1;ABCB1;ABCB6;ABCB7;ABCA6;ABCA3;ABCA9;TAP2;ABCA7;ABCA8;ABCB11;ABCG1
Rap1 signaling pathway	64/210	0.514695	0.787817	0	0	1.00436	0.667078	ITGB1;DOCK4;FLT1;ITGAM;CSF1;FLT4;CTNND1;PIK3CB;SIPA1L3;ACTB;ACTG1;FGF7;AKT3;KDR;RAC2;RAC3;RAC1;HRAS;VAV3;MAGI1;MAP2K3;MAGI3;RHOA;ENAH;PIK3CA;PARD3;RAPGEF2;PRKD2;PFN1;TLN1;PLCB1;RAPGEF5;RAF1;RAPGEF6;CRK;PFN2;RALA;PDGFB;ADCY4;PIK3R2;ADCY2;PIK3R1;EFNA5;EFNA4;GNAI1;GNAI2;CDC42;RAP1A;RRAS;KRIT1;MAPK1;MAP2K6;VASP;FARP2;ANGPT2;INSR;BRAF;VEGFA;GNAQ;ID1;GNAS;KRAS;CALM1;BCAR1
ECM-receptor interaction	27/88	0.516073	0.787817	0	0	1.01416	0.670871	ITGB1;LAMA2;LAMA4;LAMC1;HMMR;THBS3;RELN;SV2B;SV2A;DAG1;SPP1;TNR;ITGAV;VWF;ITGA2;ITGA1;LAMB4;FN1;LAMB1;COL4A2;COL6A2;COL6A1;COL4A5;ITGA7;ITGA6;ITGA5;AGRN
Natural killer cell mediated cytotoxicity	40/131	0.518205	0.787817	0	0	1.00712	0.662068	IFNA2;ARAF;ICAM2;PIK3R2;PIK3R1;PIK3CB;TNF;ICAM1;PPP3CA;PPP3R1;CASP3;TNFSF10;PLCG2;RAC2;RAC3;MAPK1;RAC1;BID;HRAS;MICA;IFNA21;MICB;VAV3;IFNA13;IFNGR2;SH2D1A;HLA-B;NFATC2;BRAF;PTPN11;HLA-A;HLA-G;HLA-E;IFNG;PIK3CA;KRAS;RAF1;SOS1;ULBP1;ULBP3
Inflammatory mediator regulation of TRP channels	30/98	0.518626	0.787817	0	0	1.01083	0.663685	CAMK2D;CAMK2A;HTR2B;ADCY4;ITPR2;ITPR3;PIK3R2;ADCY2;PIK3R1;PIK3CB;KNG1;PPP1CB;MAPK9;HRH1;PLCG2;CAMK2G;MAP2K6;MAP2K3;NTRK1;PRKCH;TRPV3;PLA2G4A;TRPV1;PIK3CA;GNAQ;TRPV4;GNAS;F2RL1;CALM1;PLCB1
Phospholipase D signaling pathway	45/148	0.528976	0.799732	0	0	1.00097	0.63743	DGKG;RALA;DGKD;CXCL8;DGKA;PDGFB;ADCY4;PIK3R2;ADCY2;PIK3R1;PIK3CB;PLD1;GRM1;AGPAT3;AGPAT4;CYTH3;GNA13;GRM4;RRAS;CXCR1;AKT3;PLCG2;MAPK1;PIP5K1C;HRAS;SPHK2;INSR;PLA2G4A;RRAS2;TSC1;PTPN11;RHOA;MTOR;PIK3CA;LPAR6;RHEB;DGKQ;GNAS;KRAS;RAF1;PLCB1;SOS1;PLPP2;PLPP1;DGKH
Hedgehog signaling pathway	17/56	0.552137	0.827407	0	0	0.99868	0.593175	GSK3B;CSNK1G3;SMURF2;DHH;CUL3;CUL1;ARRB2;CSNK1E;HHAT;CCND2;CCND1;KIF3A;GPR161;BOC;SPOP;MEGF8;CSNK1G2
Gastric acid secretion	23/76	0.552469	0.827407	0	0	0.994228	0.589933	MYLK2;CAMK2D;CAMK2A;ADCY4;ITPR2;ADCY2;ITPR3;SLC4A2;ATP1B1;ACTB;GNAI1;ACTG1;MYLK4;GNAI2;SLC9A1;CA2;HRH2;GNAQ;GNAS;GAST;PLCB1;CALM1;CAMK2G
Glycosaminoglycan biosynthesis	16/53	0.564062	0.840822	0	0	0.99072	0.567277	CSGALNACT1;B4GALT3;CHST6;B4GALT1;GLCE;CSGALNACT2;XYLT1;B3GALT6;EXT1;NDST1;EXTL2;B3GNT7;CHST12;DSE;ST3GAL1;CHST2
Malaria	15/50	0.576689	0.855467	0	0	0.981854	0.540464	CD40;CSF3;TGFB2;CXCL8;GYPC;LRP1;CD81;TNF;SELE;ICAM1;THBS3;CD40LG;IFNG;IL12A;MYD88
Glycine, serine and threonine metabolism	12/40	0.580395	0.855467	0	0	0.981863	0.53418	GCSH;SRR;SDS;CBS;PSAT1;GLYCTK;CTH;PHGDH;SDSL;AGXT;ALDH7A1;DLD
Arrhythmogenic right ventricular cardiomyopathy	23/77	0.581932	0.855467	0	0	0.975746	0.528271	ITGB1;TCF7L2;TCF7L1;LAMA2;JUP;ITGA2;ITGA1;ATP2A3;ATP2A2;ACTB;ACTG1;SLC8A3;GJA1;LMNA;DAG1;PKP2;CTNNA1;ITGA7;ITGAV;DSG2;ITGA6;ITGA5;CACNG1
Vitamin B6 metabolism	2/6	0.588133	0.858873	0	0	1.1456	0.608085	PSAT1;PDXP
Non-homologous end-joining	4/13	0.591373	0.858873	0	0	1.01828	0.53491	FEN1;RAD50;PRKDC;XRCC5
PPAR signaling pathway	22/74	0.592326	0.858873	0	0	0.969199	0.507568	CPT1A;MMP1;PDPK1;SCD5;ACSL5;DBI;ACSL3;SORBS1;APOA5;CYP27A1;FADS2;FABP4;SCP2;FABP5;ACOX1;SCD;UBC;SLC27A6;PLIN2;PPARG;ANGPTL4;SLC27A2
Drug metabolism	32/108	0.603797	0.871018	0	0	0.964486	0.4866	MGST3;GSTP1;MGST1;MGST2;CYP2C19;CYP3A5;ADH5;TK2;UPP1;GUSB;UGT2B10;GSTM4;GSTK1;GSTM3;GSTM2;DUT;GSTM1;RRM2;GSTO1;NME4;UCKL1;NME1;CYP2C9;NAT1;NME6;GSTA4;NME7;IMPDH2;CMPK1;HPRT1;ITPA;UGT2B7
Cushing syndrome	46/155	0.606163	0.871018	0	0	0.966633	0.483903	RB1;ATF2;SCARB1;KMT2D;GSK3B;CDKN1A;CAMK2D;FH;CAMK2A;ADCY4;ITPR2;KCNA4;ITPR3;ASH2L;ADCY2;CACNA1H;GNAI1;GNAI2;RAP1A;RASD1;CCND1;RBBP5;MAPK1;CAMK2G;LDLR;MEN1;APC2;TCF7L2;TCF7L1;CDKN2A;AIP;WNT9B;FZD8;BRAF;PBX1;POMC;CREB3;NCEH1;APC;CCNE1;CDK4;GNAQ;GNAS;ORAI1;PLCB1;ATF4
Selenocompound metabolism	5/17	0.624638	0.89354	0	0	0.954587	0.449212	TXNRD2;TXNRD1;CTH;SEPHS1;PAPSS1
Regulation of lipolysis in adipocytes	16/55	0.632429	0.900646	0	0	0.939779	0.430595	INSR;ADCY4;IRS2;ADCY2;ADRB1;PIK3R2;PIK3CB;PIK3R1;GNAI1;GNAI2;FABP4;PIK3CA;NPY;AKT3;GNAS;TSHB
Vascular smooth muscle contraction	39/133	0.637127	0.903305	0	0	0.950242	0.428356	MYLK2;RAMP2;CALCRL;RAMP3;ROCK1;ROCK2;ARAF;ADCY4;ITPR2;ITPR3;MYL6B;ADCY2;ADRA1B;ACTG2;MYLK4;NPPB;PPP1CB;GNA13;NPPC;MAPK1;ARHGEF11;GUCY1A2;EDN1;PLA2G12A;PRKCH;ARHGEF12;PPP1R12A;PLA2G2A;PLA2G4A;BRAF;RHOA;MYL6;GNAQ;GNAS;MYH9;RAF1;CALM1;PLCB1;RAMP1
Estrogen signaling pathway	40/137	0.650301	0.917711	0	0	0.944417	0.406402	ATF2;HSP90AB1;ADCY4;ITPR2;TGFA;KRT23;ITPR3;PIK3R2;ADCY2;PIK3R1;PIK3CB;GRM1;GNAI1;HSP90B1;GNAI2;AKT3;MAPK1;HRAS;HSPA8;JUN;NCOA3;HSPA2;ESR1;POMC;CREB3;KRT18;PIK3CA;GNAQ;GNAS;RARA;PGR;KRAS;RAF1;CALM1;PLCB1;SOS1;HSPA1B;ATF4;HBEGF;HSPA1A
Oxytocin signaling pathway	45/154	0.653042	0.917711	0	0	0.945462	0.402874	MYLK2;CDKN1A;CAMK2D;PRKAA1;ROCK1;ROCK2;CAMK2A;PRKAG1;ADCY4;ITPR2;ITPR3;MYL6B;ADCY2;ACTB;GNAI1;ACTG1;MYLK4;GNAI2;PPP1CB;PPP3CA;PPP3R1;MAPK7;CCND1;CD38;MAPK1;CACNG1;HRAS;CAMK2G;GUCY1A2;PRKAB2;JUN;PPP1R12A;NFATC2;PLA2G4A;EEF2;RHOA;RCAN1;MYL6;GNAQ;GNAS;KRAS;CAMK1;RAF1;CALM1;PLCB1
Graft-versus-host disease	12/42	0.657132	0.918136	0	0	0.916274	0.384716	HLA-DMA;HLA-DMB;IFNG;HLA-B;HLA-DPB1;HLA-A;HLA-F;TNF;HLA-G;HLA-DPA1;HLA-E;HLA-DQB1
Inositol phosphate metabolism	21/73	0.66073	0.918136	0	0	0.924992	0.383326	MTMR1;ISYNA1;MTMR2;MTMR3;INPP1;PTEN;PIK3C2G;PIK3CB;SYNJ2;MTMR4;MTMR6;FIG4;ITPKC;PIK3CA;INPP5D;INPP5J;PLCG2;PIP4K2A;PIP5K1C;PLCB1;CDIPT
Ras signaling pathway	68/232	0.663533	0.918136	0	0	0.949401	0.389423	FLT1;CSF1;FLT4;RASGRF2;RASGRF1;PIK3CB;ETS1;IKBKB;FGF7;AKT3;KDR;RAC2;RAC3;RAC1;HRAS;PLA2G12A;RASA4B;KSR1;FLT3LG;RRAS2;PLA2G4A;RHOA;PIK3CA;RASA3;RASA4;RASA1;RAPGEF5;RAF1;SOS1;RALA;PDGFB;TGFA;PIK3R2;PIK3R1;RASAL2;EFNA5;PLD1;EFNA4;RELA;CDC42;MAPK9;GNG10;RAP1A;RRAS;GNG5;GNG7;PLCG2;ABL2;MAPK1;SHOC2;PAK2;NTRK1;ANGPT2;BAD;INSR;PLA2G2A;IGF2;PTPN11;GNG11;GNG13;VEGFA;GNB1;REL;GNB4;NF1;KRAS;CALM1;RAB5A
Glutamatergic synapse	33/114	0.664857	0.918136	0	0	0.933047	0.380854	GRIK5;ADCY4;ITPR2;ITPR3;ADCY2;GRIK2;PLD1;GRM1;GNAI1;GNAI2;PPP3CA;GNG10;PPP3R1;GRM4;GNG5;GNG7;MAPK1;HOMER3;DLGAP1;GLUL;SLC38A2;SLC38A1;HOMER1;PLA2G4A;GNG11;GNG13;DLG4;GNAQ;GNB1;GNAS;GNB4;PLCB1;SHANK3
Cytosolic DNA-sensing pathway	18/63	0.66848	0.918488	0	0	0.916191	0.368995	IFNA13;DDX58;IFNA2;ADAR;RELA;IKBKB;PYCARD;NFKBIA;MAVS;POLR3B;CCL5;POLR3F;RIPK1;POLR3H;POLR2H;POLR2K;IFNA21;POLR2L
IL-17 signaling pathway	27/94	0.674217	0.918488	0	0	0.922936	0.363824	GSK3B;CSF3;CXCL8;HSP90AB1;IL25;CXCL3;ELAVL1;TNF;RELA;HSP90B1;IKBKB;MAPK9;MAPK7;CASP3;MAPK1;FADD;MAP3K7;JUN;JUND;MMP1;IL13;NFKBIA;MMP13;IFNG;FOSB;TAB2;IL17A
Type II diabetes mellitus	13/46	0.676096	0.918488	0	0	0.902345	0.353195	INSR;IRS2;PIK3R2;PIK3CB;PIK3R1;TNF;MTOR;HK1;IKBKB;MAPK9;PKM;PIK3CA;MAPK1
JAK-STAT signaling pathway	47/162	0.676629	0.918488	0	0	0.935866	0.365579	CSF3;CDKN1A;CSF3R;CSH2;IL23R;IFNA2;PDGFB;PIK3R2;PIK3R1;PIK3CB;IL22RA2;CCND2;CCND1;AKT3;EP300;IL12A;IL13RA2;IL6R;SOCS7;HRAS;IFNA21;PIAS4;IL11;IFNA13;CREBBP;TSLP;STAT1;IFNGR2;STAT2;IL13;STAT3;LIFR;PTPN11;OSMR;MTOR;GFAP;IFNG;PIK3CA;IL7;IFNE;IL9;IL3RA;IL6ST;RAF1;SOS1;IRF9;CRLF2
Dopaminergic synapse	38/132	0.686395	0.927796	0	0	0.925724	0.348352	ATF2;GSK3B;GSK3A;CAMK2D;CAMK2A;ITPR2;PPP2R2A;ITPR3;ARRB2;COMT;GNAI1;GNAI2;PPP1CB;PPP3CA;MAPK9;GNG10;PPP2R1B;GNG5;PPP2R1A;PPP2R5E;PPP2R3C;KIF5B;GNG7;AKT3;CAMK2G;SCN1A;PPP2R3B;PPP2R3A;GNG11;GNG13;CREB3;GNAQ;GNB1;GNAS;GNB4;CALM1;PLCB1;ATF4
Carbohydrate digestion and absorption	13/47	0.708977	0.952053	0	0	0.875742	0.301196	AMY1A;AMY1C;PIK3R2;PIK3CB;PIK3R1;ATP1B1;HK1;G6PC3;PIK3CA;AKT3;LCT;PLCB1;TAS1R3
Arachidonic acid metabolism	17/61	0.710309	0.952053	0	0	0.884875	0.302675	CBR1;PLA2G12A;GPX1;GPX3;PTGES2;PTGES3;GPX5;PLA2G2A;GPX8;AKR1C3;GPX7;PLA2G4A;CYP2C19;LTC4S;ALOX15B;CYP2C9;CBR3
Serotonergic synapse	32/113	0.716464	0.956284	0	0	0.904623	0.301626	APP;TPH1;ARAF;HTR2B;ITPR2;ITPR3;CYP2C19;GNAI1;SLC6A4;GNAI2;GNG10;CYP4X1;GNG5;CASP3;GNG7;MAPK1;HRAS;DUSP1;HTR3C;PLA2G4A;BRAF;ALOX15B;GNG11;GNG13;CYP2C9;GNAQ;GNB1;GNAS;GNB4;KRAS;RAF1;PLCB1
Cortisol synthesis and secretion	18/65	0.724444	0.958911	0	0	0.877078	0.282727	ATF2;SCARB1;ADCY4;ITPR2;KCNA4;ADCY2;ITPR3;CACNA1H;PBX1;POMC;CREB3;NCEH1;GNAQ;GNAS;ORAI1;PLCB1;LDLR;ATF4
Inflammatory bowel disease	18/65	0.724444	0.958911	0	0	0.877078	0.282727	JUN;TGFB2;SMAD3;STAT1;IL23R;IFNGR2;IL13;STAT3;TNF;RELA;HLA-DMA;HLA-DMB;IFNG;HLA-DPB1;IL12A;HLA-DPA1;HLA-DQB1;IL17A
Metabolism of xenobiotics by cytochrome P450	21/76	0.738226	0.973116	0	0	0.874349	0.265369	UGT2B10;GSTM4;CBR1;GSTK1;GSTM3;GSTM2;GSTM1;GSTO1;GSTP1;MGST3;AKR1C1;MGST1;MGST2;AKR7L;CYP3A5;ADH5;CYP2C9;AKR7A2;GSTA4;UGT2B7;CBR3
Proximal tubule bicarbonate reclamation	6/23	0.744372	0.97718	0	0	0.808434	0.238661	GLUD2;MDH1;CA2;CA4;ATP1B1;AQP1
Melanogenesis	28/101	0.753002	0.984457	0	0	0.878216	0.249139	GSK3B;CAMK2D;CAMK2A;TYRP1;ADCY4;ADCY2;GNAI1;GNAI2;EDNRB;EP300;MAPK1;HRAS;CAMK2G;TCF7L2;CREBBP;EDN1;TCF7L1;WNT9B;FZD8;POMC;CREB3;MC1R;GNAQ;GNAS;KRAS;RAF1;CALM1;PLCB1
Prolactin signaling pathway	19/70	0.76188	0.988785	0	0	0.853087	0.232011	GSK3B;STAT1;STAT3;PIK3R2;PIK3CB;PIK3R1;ESR1;RELA;MAPK9;CCND2;CCND1;PIK3CA;AKT3;MAPK1;KRAS;RAF1;SOS1;HRAS;SOCS7
Aldosterone synthesis and secretion	27/98	0.762511	0.988785	0	0	0.870688	0.236077	ATF1;ATF2;SCARB1;CAMK2D;DAGLA;CAMK2A;ADCY4;ITPR2;ITPR3;ADCY2;CACNA1H;CAMK2G;LDLR;PDE2A;ATP1B1;POMC;CREB3;CYP11B2;GNAQ;GNAS;ORAI1;PRKD2;CAMK1;CALM1;DAGLB;PLCB1;ATF4
Galactose metabolism	8/31	0.769646	0.992676	0	0	0.796636	0.208579	B4GALT1;UGP2;G6PC3;AKR1B1;LCT;GLA;HK1;GALK1
Breast cancer	41/147	0.771736	0.992676	0	0	0.885406	0.22942	RB1;GSK3B;CDKN1A;FLT4;ARAF;PTEN;PIK3R2;PIK3R1;PIK3CB;LRP6;FGF7;CCND1;HEY1;AKT3;MAPK1;HES1;POLK;HRAS;APC2;TCF7L2;JUN;TCF7L1;JAG1;GADD45B;GADD45A;NCOA3;WNT9B;FZD8;BRAF;ESR1;MTOR;GADD45G;DDB2;PIK3CA;APC;RPS6KB1;CDK4;PGR;KRAS;RAF1;SOS1
Thyroid hormone synthesis	20/75	0.794411	0.999995	0	0	0.832575	0.191621	ATF2;GPX1;GPX3;GPX5;GPX8;ADCY4;GPX7;ITPR2;ADCY2;ITPR3;ATP1B1;HSP90B1;CREB3;GNAQ;CANX;GNAS;PLCB1;SLC26A4;TSHB;ATF4
Th17 cell differentiation	29/107	0.799976	0.999995	0	0	0.851108	0.189945	HSP90AB1;IL23R;HIF1A;CD3D;RELA;IKBKB;PPP3CA;MAPK9;PPP3R1;HLA-DMA;HLA-DMB;MAPK1;IL6R;HLA-DPA1;JUN;SMAD4;SMAD3;STAT1;IFNGR2;STAT3;NFATC2;MTOR;NFKBIA;IFNG;RARA;HLA-DPB1;IL6ST;HLA-DQB1;IL17A
Phenylalanine metabolism	4/17	0.807634	0.999995	0	0	0.704759	0.150569	GOT1;PAH;GOT2;MIF
Starch and sucrose metabolism	9/36	0.810292	0.999995	0	0	0.763349	0.160578	GPI;UGP2;G6PC3;AMY1A;AMY1C;ENPP3;GBA3;GYG1;HK1
Hypertrophic cardiomyopathy	24/90	0.81063	0.999995	0	0	0.832465	0.174771	ITGB1;EDN1;PRKAB2;PRKAA1;TGFB2;LAMA2;ITGA2;ITGA1;ATP2A3;PRKAG1;ATP2A2;TNF;ACTB;ACTG1;SLC8A3;MYL2;LMNA;DAG1;ITGA7;ITGAV;ITGA6;ITGA5;CACNG1;MYH6
Signaling pathways regulating pluripotency of stem cells	39/143	0.816254	0.999995	0	0	0.858252	0.17425	GSK3B;RIF1;HOXD1;PIK3R2;PIK3R1;PIK3CB;BMI1;ACVR1C;AKT3;MAPK1;SKIL;HRAS;ACVR1;APC2;SMAD1;SMAD4;SMAD3;PCGF2;STAT3;WNT9B;FZD8;LIFR;INHBB;INHBA;ACVR2A;BMP4;MEIS1;REST;PIK3CA;APC;KAT6A;ID2;ID1;COMMD3-BMI1;ID3;KRAS;TCF3;IL6ST;RAF1
D-Glutamine and D-glutamate metabolism	1/5	0.836536	0.999995	0	0	0.572704	0.102219	GLUD2
Neomycin, kanamycin and gentamicin biosynthesis	1/5	0.836536	0.999995	0	0	0.572704	0.102219	HK1
Chemical carcinogenesis	66/239	0.843196	0.999995	0	0	0.872678	0.14884	RB1;ATF2;HSP90AB1;ARRB2;PIK3CB;FGF7;CCND1;AKT3;RPS6KA1;KPNA4;KPNA5;KPNA2;HRAS;KPNA1;UGT2B10;GSTK1;CBR1;PAQR7;GSTO1;AIP;CREB3;PIK3CA;BIRC5;PGR;RAF1;SOS1;UGT2B7;ATF4;MGST3;GSTP1;MGST1;ADCY4;MGST2;XIAP;PIK3R2;ADCY2;ADRB1;PIK3R1;CYP2C19;CYP3A5;GNAI1;RELA;GNAI2;HSP90B1;MAPK1;GSTM4;GSTM3;GSTM2;JUN;GSTM1;JAG1;BAD;PTGES3;STAT3;EPHX4;AKR1C2;ESR1;MTOR;VEGFA;CYP2C9;GSTA4;BCL6;NAT1;RPS6KB1;GNAS;KRAS
Th1 and Th2 cell differentiation	24/92	0.844397	0.999995	0	0	0.807864	0.136636	RBPJL;JUN;JAG1;MAML2;MAML1;STAT1;IFNGR2;IL13;NFATC2;CD3D;RELA;IKBKB;NFKBIA;PPP3CA;MAPK9;HLA-DMA;PPP3R1;HLA-DMB;IFNG;HLA-DPB1;MAPK1;IL12A;HLA-DPA1;HLA-DQB1
Glycolysis / Gluconeogenesis	17/67	0.848009	0.999995	0	0	0.778353	0.128323	GPI;ACSS2;PDHA1;AKR1A1;ENO1;PDHB;ADH5;HK1;ALDH3A2;PKM;G6PC3;PGK1;ALDOA;ALDH7A1;DLD;LDHAL6A;ALDH9A1
Glycosphingolipid biosynthesis	11/45	0.848887	0.999995	0	0	0.740768	0.12136	B4GALT3;B3GALNT1;B4GALT1;FUT7;HEXB;HEXA;GCNT2;B3GALT4;NAGA;ST3GAL1;GLA
Synaptic vesicle cycle	20/78	0.850304	0.999995	0	0	0.78934	0.128001	NSF;ATP6V1A;ATP6V0B;ATP6V1G1;ATP6V0E1;STXBP1;CLTC;TCIRG1;AP2B1;CPLX2;SLC6A2;CPLX1;SLC6A4;SLC6A9;ATP6V0A4;ATP6V1E1;ATP6V0E2;STX2;STX1A;ATP6V1C1
Ascorbate and aldarate metabolism	7/30	0.851342	0.999995	0	0	0.696941	0.112167	UGT2B10;ALDH3A2;AKR1A1;GUSB;ALDH7A1;UGT2B7;ALDH9A1
Pentose and glucuronate interconversions	8/34	0.855549	0.999995	0	0	0.704564	0.109921	UGT2B10;UGP2;RPE;DCXR;AKR1A1;AKR1B1;GUSB;UGT2B7
GnRH secretion	16/64	0.859442	0.999995	0	0	0.763075	0.115584	ITPR2;ITPR3;PIK3R2;ARRB2;PIK3CB;PIK3R1;CACNA1H;PIK3CA;GNAQ;AKT3;SPP1;MAPK1;KRAS;PLCB1;RAF1;HRAS
Primary immunodeficiency	9/38	0.86002	0.999995	0	0	0.710602	0.107159	CD40;CD40LG;RFX5;RFXAP;TAP2;ORAI1;RFXANK;CD3D;ADA
Renin-angiotensin system	5/23	0.872879	0.999995	0	0	0.636117	0.0864855	CPA3;CTSA;CMA1;ATP6AP2;LNPEP
Circadian rhythm	7/31	0.87517	0.999995	0	0	0.667854	0.0890496	PRKAA1;PRKAB2;CUL1;PRKAG1;CSNK1E;SKP1;RBX1
Porphyrin and chlorophyll metabolism	10/43	0.883872	0.999995	0	0	0.693768	0.0856406	UGT2B10;FECH;HEPHL1;UROD;HMBS;BLVRB;GUSB;FXN;BLVRA;UGT2B7
Cholinergic synapse	29/113	0.885622	0.999995	0	0	0.789972	0.0959544	ACHE;CAMK2D;CAMK2A;ADCY4;ITPR2;ITPR3;PIK3R2;ADCY2;PIK3R1;PIK3CB;GNAI1;GNAI2;GNG10;GNG5;GNG7;AKT3;MAPK1;HRAS;CAMK2G;GNG11;GNG13;CREB3;PIK3CA;GNAQ;GNB1;GNB4;KRAS;PLCB1;ATF4
Caffeine metabolism	1/6	0.886217	0.999995	0	0	0.45813	0.0553393	NAT1
Phosphonate and phosphinate metabolism	1/6	0.886217	0.999995	0	0	0.45813	0.0553393	CEPT1
Other types of O-glycan biosynthesis	11/47	0.887254	0.999995	0	0	0.699514	0.0836788	B4GALT3;C1GALT1C1;ST6GAL1;B4GALT1;ST6GAL2;POFUT1;GALNT18;GALNT1;MFNG;XXYLT1;C1GALT1C1L
Hematopoietic cell lineage	25/99	0.890818	0.999995	0	0	0.773086	0.0893803	CSF3;CSF3R;ITGAM;CSF1;TNF;CD3D;HLA-DMA;HLA-DMB;CD38;CD59;IL6R;CD34;HLA-DPA1;IL11;CR2;ITGA2;ITGA1;FLT3LG;IL7;IL3RA;HLA-DPB1;CD9;ITGA6;ITGA5;HLA-DQB1
Taurine and hypotaurine metabolism	2/11	0.892108	0.999995	0	0	0.508971	0.0581085	GGT7;GAD2
Dilated cardiomyopathy	24/96	0.89817	0.999995	0	0	0.762762	0.0819176	ITGB1;TGFB2;LAMA2;ITGA2;ITGA1;ATP2A3;ADCY4;ATP2A2;ADCY2;ADRB1;TNF;ACTB;ACTG1;SLC8A3;MYL2;LMNA;DAG1;GNAS;ITGA7;ITGAV;ITGA6;ITGA5;CACNG1;MYH6
Basal cell carcinoma	15/63	0.901009	0.999995	0	0	0.715265	0.0745596	APC2;GSK3B;TCF7L2;CDKN1A;TCF7L1;GADD45B;GADD45A;WNT9B;FZD8;DDB2;GADD45G;BMP4;BMP2;APC;POLK
Intestinal immune network for IgA production	11/28	0.90322	0.999995	0	0	0.680559	0.0692733	CD40;HLA-DMA;HLA-DMB;CD40LG;HLA-DPB1;TNFRSF17;CCL28;ICOSLG;TNFSF13B;HLA-DPA1;HLA-DQB1
Circadian entrainment	24/97	0.908986	0.999995	0	0	0.752259	0.0717845	GUCY1A2;CAMK2D;CAMK2A;ADCY4;ITPR3;ADCY2;GNG11;CACNA1H;GNAI1;GNG13;GNAI2;GNG10;RASD1;GNG5;GNAQ;GNG7;GNB1;NOS1AP;GNAS;GNB4;MAPK1;CALM1;PLCB1;CAMK2G
alpha-Linolenic acid metabolism	5/25	0.916078	0.999995	0	0	0.572423	0.0501751	FADS2;PLA2G12A;ACOX1;PLA2G2A;PLA2G4A
Hippo signaling pathway	42/163	0.916782	0.999995	0	0	0.793832	0.0689725	GSK3B;SERPINE1;PPP2R2A;ACTB;ACTG1;STK3;PPP1CB;CCND2;CCND1;PPP2R1B;PPP2R1A;TP53BP2;CTNNA1;YWHAH;APC2;SMAD1;WWTR1;TCF7L2;SMAD4;TGFB2;TCF7L1;SMAD3;WNT9B;FZD8;CSNK1E;WTIP;BMP4;BMP2;DLG1;FRMD6;LATS2;APC;DLG4;PARD3;ID2;ID1;BIRC5;DCHS1;FAT4;AJUBA;LLGL1;BIRC3
Cocaine addiction	11/49	0.917257	0.999995	0	0	0.662602	0.0572275	ATF2;CREB3;JUN;CDK5;DLG4;GNAS;FOSB;GNAI1;RELA;ATF4;GNAI2
Ether lipid metabolism	11/49	0.917257	0.999995	0	0	0.662602	0.0572275	PLA2G12A;LPCAT4;PLA2G2A;LPCAT2;PLA2G4A;CEPT1;PLD1;PLPP2;PAFAH1B2;PLPP1;PAFAH1B1
Gastric cancer	38/149	0.919558	0.999995	0	0	0.782983	0.0656624	RB1;GSK3B;CDKN1A;ABCB1;ARAF;PIK3R2;PIK3R1;PIK3CB;LRP6;FGF7;CCND1;AKT3;CTNNA1;MAPK1;POLK;HRAS;APC2;TCF7L2;SMAD4;TGFB2;TCF7L1;SMAD3;GADD45B;JUP;GADD45A;WNT9B;FZD8;BRAF;MTOR;GADD45G;DDB2;PIK3CA;APC;RPS6KB1;CCNE1;KRAS;RAF1;SOS1
Amphetamine addiction	16/69	0.92717	0.999995	0	0	0.690838	0.05224	ATF2;CAMK2D;JUN;HDAC1;CAMK2A;SIRT1;PPP1CB;PPP3CA;CREB3;PPP3R1;GNAS;FOSB;CALM1;CAMK2G;STX1A;ATF4
Renin secretion	16/69	0.92717	0.999995	0	0	0.690838	0.05224	GUCY1A2;EDN1;ITPR2;ADRB1;ITPR3;GNAI1;AQP1;GNAI2;PPP3CA;PPP3R1;GNAQ;GNAS;PDE3A;ORAI1;PLCB1;CALM1
Salivary secretion	22/93	0.939495	0.999995	0	0	0.708864	0.0442424	SLC12A2;GUCY1A2;AMY1A;AMY1C;ADCY4;ITPR2;ADCY2;ADRB1;ITPR3;SLC4A2;ADRA1B;ATP1B1;STATH;HTN1;SLC9A1;HTN3;CST3;GNAQ;GNAS;CD38;PLCB1;CALM1
Ovarian steroidogenesis	11/51	0.940207	0.999995	0	0	0.629381	0.0388043	SCARB1;FSHB;INSR;HSD17B2;ADCY4;AKR1C3;GNAS;PLA2G4A;ADCY2;HSD17B7;LDLR
Fatty acid biosynthesis	3/18	0.944038	0.999995	0	0	0.457952	0.0263728	ACSL5;ACSL3;MCAT
Mucin type O-glycan biosynthesis	6/36	0.951642	0.999995	0	0	0.552508	0.0273857	C1GALT1C1;ST6GALNAC2;GALNT18;GALNT1;C1GALT1C1L;ST3GAL1;B4GALT5
Tyrosine metabolism	6/36	0.951642	0.999995	0	0	0.552508	0.0273857	FAHD1;GOT1;TYRP1;GOT2;MIF;COMT;ADH5
Phototransduction	5/28	0.956716	0.999995	0	0	0.497651	0.0220203	SLC24A1;GNAT2;GNB1;SAG;CALM1
Viral protein interaction with cytokine and cytokine receptor	23/100	0.96011	0.999995	0	0	0.683155	0.0278097	CCR1;CCL14;CXCL8;CSF1;TNFSF14;TNFRSF10C;CXCL3;TNFRSF1B;TNF;CX3CL1;TNFRSF1A;CXCL11;CCL8;CXCR1;CCL5;TNFSF10;XCL2;IL6ST;CCL18;IL6R;CCR4;CCL28;CCL15
Complement and coagulation cascades	19/85	0.961578	0.999995	0	0	0.658491	0.0257996	C1QA;CR2;ITGAM;VWF;PROS1;SERPINE1;CFI;C4BPB;C8A;CLU;KNG1;THBD;PROCR;F8;PROC;CFHR1;CD59;A2M;C1QC
Linoleic acid metabolism	5/29	0.965606	0.999995	0	0	0.476882	0.0166907	CYP2C9;PLA2G12A;PLA2G2A;PLA2G4A;CYP2C19
Adrenergic signaling in cardiomyocytes	36/150	0.966048	0.999995	0	0	0.721857	0.0249345	ATF2;CAMK2D;CAMK2A;CREM;ATP2A3;ADCY4;ATP2A2;PPP2R2A;ADRB1;ADCY2;ADRA1B;GNAI1;SLC9A1;GNAI2;PPP1CB;PPP2R1B;PPP2R1A;PPP2R5E;PPP2R3C;AKT3;MAPK1;CACNG1;CAMK2G;PPP2R3B;PPP2R3A;ATP1B1;SLC8A3;CREB3;MYL2;GNAQ;GNAS;CALM1;PLCB1;SCN4B;MYH6;ATF4
cAMP signaling pathway	54/216	0.966296	0.999995	0	0	0.761581	0.0261109	ATP2A3;ATP2A2;PIK3CB;PPP1CB;AKT3;RAC2;RAC3;EP300;RAC1;TSHB;VAV3;EDN1;PPP1R12A;FSHB;PDE4C;RRAS2;ATP1B1;RHOA;CREB3;PIK3CA;ACOX1;ORAI1;RAF1;HCN4;CAMK2D;ROCK1;ROCK2;CAMK2A;ADCY4;PIK3R2;ADCY2;ADRB1;PIK3R1;PLD1;GNAI1;RELA;GNAI2;SLC9A1;HCAR3;MAPK9;RAP1A;RRAS;NPY;MAPK1;CAMK2G;CREBBP;JUN;BAD;BRAF;NFKBIA;POMC;PDE3A;GNAS;CALM1
Steroid hormone biosynthesis	12/61	0.978787	0.999995	0	0	0.560217	0.0120115	UGT2B10;STS;CYP11B2;AKR1C1;HSD17B2;SRD5A3;AKR1C3;AKR1C2;COMT;HSD17B7;CYP3A5;UGT2B7
Endocrine and other factor-regulated calcium reabsorption	10/53	0.979871	0.999995	0	0	0.532043	0.0108187	SLC8A3;PTH;GNAQ;CLTC;GNAS;AP2B1;ATP1B1;PLCB1;ESR1;RAB11A
Taste transduction	18/86	0.981599	0.999995	0	0	0.605298	0.0112419	HCN4;TAS2R9;ENTPD2;TAS2R30;TAS2R31;TAS2R43;HTR3C;ADCY4;ITPR3;PKD1L3;GRM1;GNG13;SCNN1G;GRM4;SCNN1B;TAS2R1;PLCB1;TAS1R3
Bile secretion	19/90	0.981722	0.999995	0	0	0.611897	0.0112879	UGT2B10;SCARB1;ABCB1;ADCY4;ADCY2;SLC4A2;SLC51A;HMGCR;ATP1B1;SLC51B;ABCB11;AQP1;SLC9A1;NCEH1;CA2;GNAS;LDLR;SLC22A7;UGT2B7
Morphine addiction	19/91	0.984356	0.999995	0	0	0.603355	0.00951341	PDE4C;PDE2A;ADCY4;ADCY2;ARRB2;GNG11;GNAI1;GNAI2;GNG13;GNG10;GNG5;GRK5;GRK4;GNG7;GNB1;GNAS;GNB4;PDE3A;PDE7B
Mannose type O-glycan biosynthesis	3/23	0.985758	0.999995	0	0	0.34334	0.00492516	B4GALT3;B4GALT1;FKTN
Fructose and mannose metabolism	5/33	0.986812	0.999995	0	0	0.408638	0.00542495	FPGT;PMM2;AKR1B1;ALDOA;HK1
Herpes simplex virus 1 infection	129/498	0.988659	0.999995	0	0	0.796636	0.00908625	ZNF177;ZNF331;ZNF573;ZNF175;ZNF571;TNF;PPP1CB;ZNF81;AKT3;IL12A;ZNF600;ZNF721;ZNF841;MAP3K7;B2M;ZNF443;ZNF200;ZNF442;PDIA3;IFNA13;ZNF284;ZNF283;ZNF160;TAP2;HLA-B;TSC1;ZNF12;HLA-A;TICAM1;HLA-F;HLA-G;HCFC1;HLA-E;ZNF718;SRSF2;ZNF559;SRSF3;SRSF4;ZNF799;SRSF5;SRSF7;ZNF675;SRSF8;ZNF398;ZNF790;PIK3R2;PIK3R1;ZNF708;ZNF426;FADD;ZNF268;ZNF267;IFNA21;EIF2B4;EIF2B3;EIF2B2;ZNF140;TNFSF14;ALYREF;EIF2AK3;EIF2AK2…
Protein digestion and absorption	21/103	0.991723	0.999995	0	0	0.585311	0.00486477	CPA3;PRSS1;CELA3B;SLC36A3;COL13A1;CTRB2;COL11A1;COL12A1;SLC3A2;SLC1A5;ATP1B1;SLC8A3;COL4A2;MEP1B;SLC7A9;COL6A2;COL7A1;COL6A1;COL4A5;COL10A1;SLC38A2
Staphylococcus aureus infection	19/95	0.991788	0.999995	0	0	0.571434	0.00471179	DEFB103A;C1QA;DEFB103B;ITGAM;SELPLG;DEFA4;CFI;KRT23;DEFA3;FPR3;ICAM1;HLA-DMA;HLA-DMB;KRT18;HLA-DPB1;FCGR2C;HLA-DPA1;HLA-DQB1;C1QC
Maturity onset diabetes of the young	3/26	0.993982	0.999995	0	0	0.298493	0.0018019	HES1;NKX6-1;FOXA3
Calcium signaling pathway	56/240	0.994024	0.999995	0	0	0.694475	0.00416282	MYLK2;FLT1;FLT4;ATP2A3;HTR2B;ATP2A2;ADRA1B;GRM1;MYLK4;PPP3CA;FGF7;EDNRB;KDR;CD38;SPHK2;TACR1;ITPKC;STIM2;VDAC3;PPIF;ORAI1;VDAC2;VDAC1;PLCB1;SLC25A5;SLC25A4;SLC25A6;CAMK2D;CAMK2A;PDGFB;ADCY4;ITPR2;ADCY2;ADRB1;ITPR3;CACNA1H;PPP3R1;HRH1;HRH2;ERBB4;PHKG2;PLCG2;CAMK2G;NTRK1;NOS2;PHKB;MCOLN1;TPCN2;VEGFA;SLC8A3;P2RX4;GNAQ;GNAS;CAMK1;CALM1;MCU
GABAergic synapse	17/89	0.994336	0.999995	0	0	0.539666	0.00306554	NSF;GABARAPL2;SLC38A1;ADCY4;GAD2;ADCY2;GNG11;GNAI1;GNAI2;GNG13;GNG10;GNG5;GNG7;GNB1;GNB4;GLUL;SLC38A2
Insulin secretion	14/86	0.999142	0.999995	0	0	0.444211	0.0003815	ATF2;CAMK2D;CAMK2A;ADCY4;ADCY2;ITPR3;ATP1B1;CREB3;GNAQ;GNAS;PLCB1;CAMK2G;STX1A;ATF4
Cytokine-cytokine receptor interaction	66/295	0.999207	0.999995	0	0	0.656587	0.000521185	ACVRL1;CD40;CSF3;CSF3R;CXCL8;IL25;CSF1;IL23R;IFNA2;CXCL3;TNF;CX3CL1;CXCL16;TNFSF13B;TNFSF10;IL12A;IL13RA2;CCR4;IL6R;ACVR1;IL11;IFNA13;TNFRSF12A;IFNGR2;IL13;LIFR;OSMR;TNFRSF1B;TNFRSF1A;IFNG;IFNE;IL3RA;XCL2;IL6ST;CCL14;CSH2;ACVR1C;CCL8;CXCR1;CCL5;TNFRSF17;CCL18;RELT;CCL15;IFNA21;CCR1;IL32;TGFB2;TNFSF14;TSLP;TNFSF15;GDF15;GDF2;TNFRSF10C;INHBB;INHBA;ACVR2A;BMP4;BMP2;CXCL11;CD40LG;IL7;IL9;CCL28;CRLF2;…
Retinol metabolism	9/68	0.999727	0.999995	0	0	0.348525	9.50735e-05	UGT2B10;CYP2C9;DGAT1;AWAT2;RDH11;CYP3A5;UGT2B7;ADH5;DHRS4
Neutrophil extracellular trap formation	34/189	0.999961	0.999995	0	0	0.499765	1.94371e-05	ITGAM;SELPLG;HDAC1;FPR3;PIK3R2;PIK3R1;PIK3CB;CLCN3;HDAC8;HDAC9;ACTB;RELA;ACTG1;AKT3;PLCG2;RAC2;MAPK1;RAC1;MAP3K7;GSDMD;VWF;CYBA;MTOR;PIK3CA;PPIF;VDAC3;VDAC2;VDAC1;PADI4;RAF1;PLCB1;SLC25A5;SLC25A4;SLC25A6
Aminoacyl-tRNA biosynthesis	6/66	0.999989	0.999995	0	0	0.228348	2.45557e-06	LARS2;QRSL1;YARS2;CARS2;FARS2;WARS2
MicroRNAs in cancer	60/310	0.99999	0.999995	0	0	0.545375	5.19742e-06	CDKN1A;PTEN;IRS2;PIK3CB;BMI1;IKBKB;CCND2;CCND1;CASP3;STMN1;EP300;TNR;HRAS;APC2;ABCC1;KIF23;CDC25C;SIRT1;RHOA;FOXP1;ZEB1;PIK3CA;CCNE1;FSCN1;COMMD3-BMI1;ITGA5;ZFPM2;RAF1;SOS1;CRK;ABCB1;ROCK1;HDAC1;PDGFB;PIK3R2;PIK3R1;EFNA5;HOXD10;SLC7A1;EFNA4;MAPK7;PLCG2;IGF2BP1;MAPK1;BMF;CREBBP;TGFB2;UBE2I;CDKN2A;RDX;STAT3;MTOR;VEGFA;HNRNPK;APC;MDM2;ATM;MDM4;KRAS;VIM
Alcoholism	30/186	0.999992	0.999995	0	0	0.43782	3.31022e-06	ATF2;HDAC1;ARAF;HDAC8;HDAC9;GNAI1;GNAI2;PPP1CB;GNG10;GNG5;GNG7;NPY;MAPK1;HRAS;BRAF;GNG11;GNG13;CREB3;PKIA;GNB1;GNAS;GNB4;FOSB;KRAS;RAF1;CALM1;SLC29A1;SOS1;SLC29A3;ATF4
Olfactory transduction	57/440	0.999993	0.999995	0	0	0.334733	2.23463e-06	OR8I2;OR9K2;OR1C1;OR11H12;OR8U8;OR4M2;ARRB2;OR4Q2;OR8U1;OR1S2;OR5H14;OR13D1;OR5D14;OR52B6;OR8H2;OR4D2;OR4P4;ANO2;OR2T1;OR2AT4;OR4C12;OR2B11;OR52A1;OR4C6;OR1A1;CAMK2D;OR2G3;OR13J1;CAMK2A;OR4K1;OR10T2;OR8S1;OR4S1;OR5M10;OR2W3;OR8B8;GNG7;OR4A47;OR7D2;CAMK2G;OR10K2;OR2F2;PDE2A;OR51M1;OR5L1;OR2J1;OR5T3;GNG13;OR5T1;SLC8A3;OR6V1;GNB1;OR11A1;OR8A1;OR51A2;CALM1;OR7G3
Neuroactive ligand-receptor interaction	49/341	0.999994	0.999995	0	0	0.379461	2.36983e-06	PRSS1;GRIK5;HTR2B;GRIK2;NR3C1;ADRA1B;GRM1;EDNRB;GRM4;TSPO;TSHB;PTGDR;CHRNB1;EDN1;GRID2;GRID1;TAAR6;FSHB;TACR1;MC3R;CORT;PARD3;CHRNA1;CALCRL;PTH;CSH2;FPR3;ADRB1;KNG1;HRH1;GLRA3;NPW;CNR2;GALR2;HRH2;CHRNE;NPY;CHRNA10;TAC4;S1PR3;TRPV1;HCRTR1;POMC;MC1R;P2RX4;GLRB;LPAR6;GHRH;F2RL1
Systemic lupus erythematosus	15/135	0.999995	0.999995	0	0	0.284621	1.37111e-06	C1QA;CD40;ACTN4;TNF;C8A;HLA-DMA;HLA-DMB;CD40LG;IFNG;SNRPD1;HLA-DPB1;SNRPD3;HLA-DPA1;HLA-DQB1;C1QC

## Sheet: GO Biological Process
Term	Overlap	P-value	Adjusted P-value	Old P-value	Old Adjusted P-value	Odds Ratio	Combined Score	Genes
cytoplasmic translation (GO:0002181)	80/93	7.51542e-29	4.39277e-25	0	0	14.2738	924.343	EIF4A2;EIF4A1;RPL5;RPL30;RPL3;RPL32;RPL31;RPL34;RPLP1;RPLP0;RPL10A;RPL8;RPL9;RPL6;RPL7;RPS15;RPS4X;RPL7A;RPS17;RPS16;RPL18A;RPS19;RPS18;RPL35;RPL38;RPL37;RPS10;RPS13;RPS12;RPS9;RPL21;RPS7;RPS8;RPL23;RPL22;RPS6;RPL13A;RPS3A;RPSA;FTSJ1;RPL37A;RPL24;ETF1;RPL27;RPL26;RPL29;RPL28;UBA52;RPL10;RPL12;RPL11;RPL36A;RPS15A;RPL14;RPL13;RPL15;RPS2;RPL18;RPS27A;RPL17;RPL19;EIF2B3;RPL41;TMA7;RPL23A;RPS26;RPS25;…
SRP-dependent cotranslational protein targeting to membrane (GO:0006614)	77/90	1.74457e-27	5.09851e-24	0	0	13.7317	846.053	RPL5;RPL30;RPL3;RPL32;RPL31;RPL34;RPLP1;RPLP0;ZFAND2B;SRP54;RPL10A;RPL8;SRP14;RPL9;RPL6;RPL7;RPS15;RPS4X;RPL7A;RPS17;RPS16;RPL18A;RPS19;RPS18;RPL35;RPLP2;RPL38;RPL37;SEC61B;RPS10;RPS13;RPS12;SEC63;RPS9;RPL21;RPS7;RPS8;RPL23;RPL22;RPS6;RPL13A;RPS3A;RPSA;SRP9;RPL37A;RPL24;RPL27;RPL26;RPL29;RPL28;UBA52;RPL10;RPL12;RPL11;RPL36A;RPS15A;SRP72;RPL14;RPL13;RPL15;RPS2;RPL18;RPS27A;RPL17;RPL19;RPL41;RPL23A…
cotranslational protein targeting to membrane (GO:0006613)	79/94	4.41668e-27	8.60517e-24	0	0	12.2122	741.09	RPL5;RPL30;RPL3;ARL6IP1;RPL32;RPL31;RPL34;RPLP1;RPLP0;SRP54;RPL10A;RPL8;SRP14;RPL9;RPL6;RPL7;RPS15;RPS4X;RPL7A;RPS17;RPS16;RPL18A;RPS19;RPS18;RPL35;RPLP2;RPL38;RPL37;RPS10;SIL1;RPS13;RPS12;SEC63;RPS9;RPL21;RPS7;RPS8;RPL23;SSR2;RPL22;RPS6;RPL13A;RPS3A;RPSA;SRP9;RPL37A;RPL24;RPL27;RPL26;RPL29;RPL28;UBA52;RPL10;RPL12;RPL11;RPL36A;RPS15A;SRP72;RPL14;RPL13;SSR1;RPL15;RPS2;RPL18;RPS27A;RPL17;RPL19;RPL4…
translation (GO:0006412)	138/214	5.15771e-25	7.43822e-22	0	0	4.23358	236.759	RPL5;RPL30;RPL3;RPL32;RPL31;RPL34;RPL8;APEH;RPL10A;RPL9;YARS2;RPL6;RPL7;RPS15;EEF1B2;RPS17;RPS16;RPL18A;RPS19;RPS18;RPL35;RPL38;RPL37;RPS10;RPS13;RPS12;RPS9;RPL21;RPS7;RPS8;RPL23;RPL22;RPS6;MRPS18B;RPSA;GTPBP1;FTSJ1;MRPS18C;TUFM;LARS2;EEF1A2;RPL24;RPL27;RPL26;RPL29;RPL28;UBA52;RPS4Y2;MRPL18;MRPL13;MRPL10;MRPL11;RPL41;MRPL27;TMA7;EEF2;MRPL24;AIMP1;RPS26;AIMP2;RPS25;RPS28;RPS27;RPS29;RPL27A;AGO2;RP…
protein targeting to ER (GO:0045047)	82/103	6.36289e-25	7.43822e-22	0	0	9.05488	504.485	RPL5;RPL30;RPL3;RPL32;RPL31;RPL34;RPLP1;RPLP0;ZFAND2B;SRP54;RPL10A;RPL8;SRP14;RPL9;RPL6;RPL7;RPS15;RPS4X;RPL7A;RPS17;RPS16;RPL18A;RPS19;RPS18;SEC61G;RPL35;RPLP2;RPL38;RPL37;RPS10;RPS13;RPS12;SEC63;RPS9;RPL21;RPS7;RPS8;RPL23;RPL22;RPS6;RPL13A;RPSA;RPS3A;SRP9;RPL37A;CHMP4B;RPL24;RPL27;RPL26;RPL29;RPL28;UBA52;RPL10;RPL12;RPL11;RPL36A;RPS15A;SRP72;RPL14;RPL13;RPL15;RPS2;RPL18;RPS27A;RPL17;RPL19;RPL41…
gene expression (GO:0010467)	198/356	1.95775e-23	1.90718e-20	0	0	2.93414	153.419	RPL5;RPL30;NUP107;RPL3;RPL32;RPL31;RPL34;HNRNPU;RPL8;RPL9;RPL6;RPL7;GLE1;RPS15;RPS17;RPS16;RPL18A;RPS19;CLP1;RPS18;MAGOH;RPL35;RPL38;RPL37;RPS10;RPS13;RPS12;DDX17;MEF2A;RPL21;RPL23;RPL22;MRPS18B;MRPS18C;SRRM1;NUP93;DDX39A;SARNP;ZC3H11A;RPL24;RPL27;NUP98;RPL26;RPL29;RPL28;SLBP;NUP205;POM121;RPS4Y2;SEH1L;DHX8;MRPL18;BAZ2A;MRPL13;MRPL10;MRPL11;POM121C;NUP85;TSPAN5;NUP88;RPL41;MRPL27;MAGOHB;MRPL24;RP…
peptide biosynthetic process (GO:0043043)	108/162	1.45944e-21	1.21864e-18	0	0	4.64701	222.946	RPL5;RPL30;RPL3;RPL32;RPL31;RPL34;RPL10A;RPL8;RPL9;YARS2;RPL6;RPL7;RPS15;RPS17;RPS16;RPL18A;RPS19;RPS18;RPL35;RPL38;RPL37;RPS10;RPS13;RPS12;RPS9;RPL21;RPS7;RPS8;RPL23;RPL22;RPS6;MRPS18B;RPSA;MRPS18C;EEF1A2;RPL24;RPL27;RPL26;RPL29;RPL28;RPS4Y2;MRPL18;MRPL13;MRPL10;MRPL11;GGT7;RPL41;MRPL27;MRPL24;RPS26;RPS25;RPS28;RPS27;RPS29;RPL27A;AGO2;RPS20;RPS21;RSL24D1;RPS24;RPS23;MRPS17;MRPS15;MRPS16;MRPS14;M…
nuclear-transcribed mRNA catabolic process, nonsense-mediated decay (GO:0000184)	83/113	4.18726e-21	3.05932e-18	0	0	6.41263	300.895	RPL5;RPL30;SMG1;RPL3;RPL32;RPL31;RPL34;RPLP1;RPLP0;PPP2R2A;SMG9;RPL10A;RPL8;RPL9;RPL6;RPL7;RPS15;RPS4X;RPL7A;RPS17;RPS16;RPL18A;RPS19;PPP2R1A;RPS18;MAGOH;RPL35;RPLP2;RPL38;RPL37;RPS10;RPS13;RPS12;UPF1;RPS9;RPL21;RPS7;RPS8;RPL23;RPL22;RPS6;RPL13A;RPSA;RPS3A;RPL37A;RPL24;RPL27;ETF1;RPL26;PABPC1;RPL29;RPL28;UBA52;RBM8A;RPL10;RPL12;RPL11;RPL36A;RPS15A;RPL14;RPL13;RPL15;RPS2;RPL18;RPS27A;RPL17;RPL19;R…
rRNA processing (GO:0006364)	112/173	9.16912e-21	5.95483e-18	0	0	4.26681	196.864	POP5;RPL5;RPL30;RPL3;RPL32;RPL31;POP4;RPL34;FCF1;PWP2;RPL10A;RPL8;RPL9;RPL6;RPL7;RPS15;FBL;RPS17;RPS16;RPL18A;RPS19;RPL35;RPL38;RPL37;RPS9;RPL21;RPS7;IMP3;PIH1D1;RPL23;RPL22;RPS6;WDR74;DDX10;IMP4;EBNA1BP2;MRTO4;PIH1D2;RPL24;RPL27;SRFBP1;RPL26;RPL29;RPL28;UBA52;PRKDC;NOLC1;SNU13;RPF1;RRP7A;EMG1;NOP14;RPL41;WDR55;RPS25;RPS28;LSM6;RPS27;EIF6;RPL27A;RPS24;DDX49;NVL;RPLP1;WDR3;RPLP0;WDR43;RPL7A;NOB1;R…
ribosome biogenesis (GO:0042254)	120/192	2.91274e-20	1.7025e-17	0	0	3.87527	174.32	LTV1;POP5;RPL5;RPL30;RPL3;RPL32;RPL31;POP4;RPL34;FCF1;PWP2;RPL10A;RPL8;RPL9;RPL6;RPL7;RPS15;FBL;RPS17;RPS16;RPL18A;RPS19;RPL35;RPL38;RPL37;GLUL;NOM1;RPS9;RPL21;RPS7;IMP3;PIH1D1;RPL23;RPL22;RPS6;GTF3A;WDR74;DDX10;IMP4;TSC1;EBNA1BP2;MRTO4;PIH1D2;RPL24;RPL27;RPL26;RPL29;RPL28;UBA52;NOLC1;SNU13;VCX;RPF1;RRP7A;EMG1;NOP14;RPL41;NOP16;MRPL22;WDR55;RPS25;RPS28;RPS27;EIF6;RPL27A;RPS24;DDX49;NVL;RPLP1;WDR3…
ncRNA processing (GO:0034470)	123/201	1.2564e-19	6.36145e-17	0	0	3.66686	159.585	POP5;RPL5;RPL30;POP7;RPL3;RPL32;RPL31;POP4;RPL34;RPP30;FCF1;PWP2;RPL8;RPL10A;RPL9;RPL6;RPL7;RPS15;FBL;RPS17;RPS16;RPL18A;RPS19;RPL35;RPL38;RPL37;RPS9;RPL21;RPS7;IMP3;PIH1D1;RPL23;METTL3;RPL22;RPS6;WDR74;DDX10;IMP4;EBNA1BP2;MRTO4;RPP21;PIH1D2;RPL24;RPL27;RPL26;RPL29;RPL28;UBA52;NOLC1;SNU13;RPF1;RRP7A;EMG1;SMAD1;RPL41;NOP14;SMAD3;INTS1;INTS3;WDR55;RPS25;RPS28;RPS27;AGO4;RPL27A;AGO2;INTS5;INTS4;INTS…
rRNA metabolic process (GO:0016072)	105/162	1.30603e-19	6.36145e-17	0	0	4.27706	185.976	POP5;RPL5;RPL30;RPL3;RPL32;RPL31;POP4;RPL34;FCF1;PWP2;RPL10A;RPL8;RPL9;RPL6;RPL7;RPS15;FBL;RPS17;RPS16;RPL18A;RPS19;RPL35;RPL38;RPL37;RPS9;RPL21;RPS7;IMP3;PIH1D1;RPL23;RPL22;RPS6;WDR74;DDX10;IMP4;EBNA1BP2;XRN1;MRTO4;PIH1D2;RPL24;RPL27;RPL26;RPL29;RPL28;UBA52;NOLC1;SNU13;RPF1;RRP7A;EMG1;NOP14;RPL41;WDR55;RPS25;RPS28;RPS27;RPL27A;RPS24;DDX49;NVL;RPLP1;WDR3;RPLP0;WDR43;RPL7A;NOB1;RPLP2;RRP12;TEX10;R…
nuclear-transcribed mRNA catabolic process (GO:0000956)	109/171	1.76721e-19	7.94563e-17	0	0	4.0832	176.311	RPL5;RPL30;RPL3;RPL32;RPL31;RPL34;PPP2R2A;RPL10A;RPL8;RPL9;RPL6;RPL7;RPS15;RPS17;RPS16;RPL18A;RPS19;PPP2R1A;RPS18;MAGOH;RPL35;RPL38;RPL37;MTPAP;PELO;RPS10;RPS13;RPS12;RPS9;RPL21;RPS7;RPS8;RPL23;RPL22;RPS6;RC3H1;RPSA;RC3H2;XRN1;MRTO4;RPL24;RPL27;RPL26;RPL29;RPL28;UBA52;RBM8A;RPL41;LSM1;UPF3A;MAGOHB;RPS26;RPS25;RPS28;CNOT7;PAN3;RPS27;CNOT1;RPS29;RPL27A;ATM;RPS20;CNOT8;RPS21;RPS24;RPS23;SMG1;RPLP1;R…
mitochondrial ATP synthesis coupled electron transport (GO:0042775)	58/71	4.89071e-19	2.04187e-16	0	0	10.3107	434.717	COX7B;NDUFA11;NDUFA12;COX4I1;NDUFA10;COX6A1;COX7C;UQCRFS1;COA6;COX8A;NDUFC2;NDUFC1;SDHD;COX6B1;COX7A2L;NDUFS8;NDUFS7;SDHAF2;NDUFS6;NDUFS5;NDUFS4;UQCRC1;NDUFS2;UQCRC2;NDUFB9;NDUFB8;NDUFB7;NDUFB10;NDUFB6;UQCRB;NDUFB11;NDUFB5;NDUFB4;NDUFB3;NDUFB2;NDUFB1;UQCR11;UQCR10;COX5B;COX5A;UQCRH;CYC1;NDUFV3;NDUFV2;NDUFV1;NDUFA9;NDUFA7;NDUFA6;NDUFA4;NDUFA3;NDUFA2;NDUFA1;COX6C;UQCRHL;UQCRQ;NDUFAB1;CYCS;NDUFAF1
aerobic electron transport chain (GO:0019646)	57/70	1.3251e-18	5.16348e-16	0	0	10.1312	417.052	COX7B;NDUFA11;NDUFA12;COX4I1;NDUFA10;COX6A1;COX7C;UQCRFS1;COX8A;NDUFC2;NDUFC1;SDHD;COX6B1;COX7A2L;NDUFS8;NDUFS7;SDHAF2;NDUFS6;NDUFS5;NDUFS4;UQCRC1;NDUFS2;UQCRC2;NDUFB9;NDUFB8;NDUFB7;NDUFB10;NDUFB6;UQCRB;NDUFB11;NDUFB5;NDUFB4;NDUFB3;NDUFB2;NDUFB1;UQCR11;UQCR10;COX5B;COX5A;UQCRH;CYC1;NDUFV3;NDUFV2;NDUFV1;NDUFA9;NDUFA7;NDUFA6;NDUFA4;NDUFA3;NDUFA2;NDUFA1;COX6C;UQCRHL;UQCRQ;NDUFAB1;CYCS;NDUFAF1
cellular protein metabolic process (GO:0044267)	211/417	2.56831e-18	9.38237e-16	0	0	2.39515	97.0113	RPL5;APP;RPL30;RPL3;RPL32;RPL31;RPL34;ARAF;UBE2L6;RPL8;RPL9;ZDHHC2;RPL6;RPL7;RPS15;RPS17;LGALS1;RPS16;RPL18A;RPS19;RPS18;RPL35;MAGEA2;RPL38;RPL37;SEPHS1;RPS10;RPS13;RPS12;RPL21;RPL23;RPL22;MRPS18B;MRPS18C;ADPRH;RPL24;RPL27;PADI4;RPL26;RPL29;RPL28;UBA52;RPS4Y2;RPN2;PRKDC;MRPL18;GATA6;MRPL13;MRPL10;MRPL11;APH1A;APH1B;STC2;ST8SIA4;ST3GAL1;NAPSA;RPL41;ICMT;YES1;ABCA3;SIAH2;FUCA2;FN1;MRPL27;IGF2;MRPL2…
cellular macromolecule biosynthetic process (GO:0034645)	167/314	2.09486e-17	7.20262e-15	0	0	2.6481	101.699	RPL5;RPL30;RPL3;RPL32;RPL31;RPL34;RPL8;RPL10A;RPL9;YARS2;RPL6;RPL7;RPS15;EEF1B2;RPS17;RPS16;RPL18A;RPS19;RPS18;CHEK1;RPL35;KAT7;RPL38;RPL37;RPS10;RPS13;RPS12;MEF2A;TIPIN;RPS9;RPL21;RPS7;RPS8;RPL23;RPL22;RPS6;MRPS18B;REV1;RPSA;GTPBP1;MRPS18C;TUFM;GRWD1;EEF1A2;RPL24;RPL27;RPL26;RPL29;RPL28;RHNO1;RPS4Y2;SET;RNASEH2A;MRPL18;BAZ2A;MRPL13;MRPL10;MRPL11;ORC2;RPL41;MRPL27;INHBA;EEF2;MRPL24;EXT1;RPS26;FAM…
mitochondrial respiratory chain complex I assembly (GO:0032981)	45/58	1.55686e-13	4.78941e-11	0	0	7.98243	235.409	NDUFB9;NDUFB8;NDUFB7;NDUFA11;NDUFB10;NDUFB6;NDUFA12;NDUFB11;NDUFB5;NDUFB4;NDUFA10;NDUFB3;NDUFB2;NDUFB1;FOXRED1;NDUFV3;NDUFV2;NDUFV1;NDUFA9;NDUFA7;COA1;NDUFA6;TIMMDC1;NDUFA3;ACAD9;NDUFA2;NDUFA1;NDUFC2;NDUFC1;BCS1L;OXA1L;NDUFS8;NDUFS7;NDUFAF6;NDUFS6;NDUFAF7;NDUFS5;NDUFAF4;NDUFS4;NDUFAB1;TMEM126A;NDUFS2;NDUFAF3;TMEM126B;NDUFAF1
NADH dehydrogenase complex assembly (GO:0010257)	45/58	1.55686e-13	4.78941e-11	0	0	7.98243	235.409	NDUFB9;NDUFB8;NDUFB7;NDUFA11;NDUFB10;NDUFB6;NDUFA12;NDUFB11;NDUFB5;NDUFB4;NDUFA10;NDUFB3;NDUFB2;NDUFB1;FOXRED1;NDUFV3;NDUFV2;NDUFV1;NDUFA9;NDUFA7;COA1;NDUFA6;TIMMDC1;NDUFA3;ACAD9;NDUFA2;NDUFA1;NDUFC2;NDUFC1;BCS1L;OXA1L;NDUFS8;NDUFS7;NDUFAF6;NDUFS6;NDUFAF7;NDUFS5;NDUFAF4;NDUFS4;NDUFAB1;TMEM126A;NDUFS2;NDUFAF3;TMEM126B;NDUFAF1
mitochondrial electron transport, NADH to ubiquinone (GO:0006120)	34/39	2.43788e-13	7.1247e-11	0	0	15.6615	454.849	NDUFB9;NDUFB8;NDUFB7;NDUFA11;NDUFB10;NDUFB6;NDUFA12;NDUFB11;NDUFB5;NDUFB4;NDUFA10;NDUFB3;NDUFB2;NDUFB1;NDUFV3;NDUFV2;NDUFV1;NDUFA9;NDUFA7;NDUFA6;NDUFA4;NDUFA3;NDUFA2;NDUFA1;NDUFC2;NDUFC1;NDUFS8;NDUFS7;NDUFS6;NDUFS5;NDUFAB1;NDUFS4;NDUFS2;NDUFAF1
anaphase-promoting complex-dependent catabolic process (GO:0031145)	58/84	3.06039e-13	8.51807e-11	0	0	5.15052	148.413	RB1;CDC20;PSMD8;PSMD9;PSMD6;CDC23;PSMD7;PSMD4;PTTG1;PSMD5;CDC26;CDC27;PSMD3;SKP2;PSMA6;PSMA4;PSMA1;PSMA2;PSME1;UBA52;PSMD10;PSMD12;ANAPC15;PSMD11;ANAPC16;PSMD14;PSMD13;CUL3;ANAPC10;AURKB;PSMB10;AURKA;PSMB6;PSMB7;CCNB1;FZR1;PSMB4;PSMB5;PSMB2;UBB;PSMB3;PSMB1;UBC;BUB3;RPS27A;UBE2C;PLK1;PSMB8;PSMB9;PSMC5;PSMC6;PSMC4;UBE2S;PSMC1;CDC16;PSMC2;CDK1;MAD2L1
regulation of mRNA catabolic process (GO:0061013)	75/122	1.13387e-12	3.01249e-10	0	0	3.6892	101.473	FMR1;HSPB1;ELAVL1;PSMD8;PSMD9;PSMD6;PSMD7;XPO1;PSMD4;PSMD5;PSMD3;UPF1;RC3H1;GTPBP1;RC3H2;PSMA6;CARHSP1;PSMA4;XRN1;PSMA1;PSMA2;MAPKAPK2;PSME1;PABPC1;UBA52;DCP2;PSMD10;PSMD12;PSMD11;SET;ANP32A;PSMD14;PSMD13;PRR5L;ZFP36L2;PSMB10;FXR1;EXOSC7;PSMB6;PSMB7;EXOSC5;PSMB4;EXOSC4;PSMB5;UBB;PSMB2;PSMB3;EXOSC9;UBC;PSMB1;IGF2BP1;IGF2BP2;RPS27A;EXOSC1;HSPA8;YTHDF1;YTHDF2;SAMD4A;SAMD4B;PSMB8;PUM2;PSMB9;PSMC5;CNO…
protein modification by small protein removal (GO:0070646)	139/276	2.41053e-12	6.12589e-10	0	0	2.35555	63.0137	OTUD4;OTUD5;KDM1B;CCP110;KEAP1;TOMM20;ACTB;CDC20;PSMD8;PSMD9;PSMD6;USP17L4;PSMD7;USP17L5;PSMD4;PSMD5;PSMD3;EP300;SKP2;MAP3K7;USP7;USP5;USP3;YOD1;HCFC1;RNF128;HGS;PSME1;UBA52;PSMD10;PSMD12;VCP;PSMD11;PSMD14;PSMD13;COPS7B;COPS7A;HIF1A;SNX3;VCPIP1;RHOT1;UBB;ATXN7;UBC;RIPK1;SMAD1;SMAD4;SMAD3;TOR1A;SMURF2;SIAH2;INO80;ESR1;COPS4;NFKBIA;COPS3;COPS6;COPS2;CDK1;MDM2;MDM4;COPS8;BAP1;USP37;WDR48;USP38;USP31…
translational elongation (GO:0006414)	65/104	1.24612e-11	3.02548e-09	0	0	3.84897	96.6415	MRPS17;GFM1;MRPS15;MRPS16;MRPS14;MRPS11;MRPS12;LTN1;MRPL39;MRPS10;MRPL36;MRPL37;MRPL34;MRPL35;MRPL32;EEF1B2;MRPL4;MRPL3;MRPL2;MRPL40;MRPL9;CHCHD1;MRPS28;TSFM;MRPS27;MRPS24;MRPS22;MRPS18B;MRPL49;MRPS21;MRPL47;MRPL48;MRPS7;GTPBP1;MRPL46;MRPS6;MRPL43;MRPS18C;TUFM;EEF1G;OXA1L;MRPL50;MRPL51;EEF1D;EEF1A2;AURKAIP1;MRPS35;MRPS36;MRPL18;MRPL19;MRPS34;MRPL17;MRPL14;MRPL13;MRPL57;MRPL10;MRPL11;MRPL55;MRPL20…
mitochondrial translational elongation (GO:0070125)	58/89	1.29405e-11	3.02548e-09	0	0	4.31824	108.261	MRPS17;GFM1;MRPS15;MRPS16;MRPS14;MRPS11;MRPS12;MRPL39;MRPS10;MRPL36;MRPL37;MRPL34;MRPL35;MRPL32;MRPL4;MRPL3;MRPL2;MRPL40;MRPL9;CHCHD1;MRPS28;TSFM;MRPS27;MRPS24;MRPS22;MRPL49;MRPS18B;MRPS21;MRPL47;MRPL48;MRPS7;MRPL46;MRPS6;MRPL43;MRPS18C;TUFM;OXA1L;MRPL50;MRPL51;AURKAIP1;MRPS35;MRPS36;MRPL18;MRPL19;MRPS34;MRPL17;MRPL14;MRPL13;MRPL57;MRPL10;MRPL11;MRPL55;MRPL20;PTCD3;MRPL27;MRPL24;MRPL21;MRPL22
mitochondrial translation (GO:0032543)	65/105	2.30248e-11	5.17615e-09	0	0	3.75247	91.9148	MRPS17;GFM1;MRPS15;MRPS16;MRPS14;MRPS11;MRPS12;MRPL39;MRPS10;MRPL36;MRPL37;MRPL34;MRPL35;MRPL32;MRPL4;MRPL3;MTRF1;MRPL2;MRPL40;MRPL9;CHCHD1;MRPS28;TSFM;MRPS27;MRPS24;MRPS22;MRPS18B;MRPL49;MRPS21;MRPL47;MRPL48;MRPS7;QRSL1;MRPL46;MRPS6;MRPL43;MRPS18C;TUFM;LARS2;OXA1L;MRPL50;MRPL51;NOA1;AURKAIP1;MRRF;MRPS35;MRPS36;MRPL18;MRPL19;MRPS34;MRPL17;MRPL14;MTIF3;MRPL13;MRPL57;MRPL10;MRPL11;MRPL55;MRPL20;PTC…
mitochondrial translational termination (GO:0070126)	57/89	5.49155e-11	1.18882e-08	0	0	4.11019	97.1042	MRPS17;MRPS15;MRPS16;MRPS14;MRPS11;MRPS12;MRPL39;MRPS10;MRPL36;MRPL37;MRPL34;MRPL35;MRPL32;MRPL4;MRPL3;MRPL2;MTRF1;MRPL40;MRPL9;CHCHD1;MRPS28;MRPS27;MRPS24;MRPS22;MRPL49;MRPS18B;MRPS21;MRPL47;MRPL48;MRPS7;MRPL46;MRPS6;MRPL43;MRPS18C;OXA1L;MRPL50;MRPL51;AURKAIP1;MRRF;MRPS35;MRPS36;MRPL18;MRPL19;MRPS34;MRPL17;MRPL14;MRPL13;MRPL57;MRPL10;MRPL11;MRPL55;MRPL20;PTCD3;MRPL27;MRPL24;MRPL21;MRPL22
translational termination (GO:0006415)	60/96	7.60526e-11	1.5876e-08	0	0	3.8466	89.6243	MRPS17;MRPS15;MRPS16;MRPS14;MRPS11;MRPS12;MRPL39;MRPS10;MRPL36;MRPL37;APEH;MRPL34;MRPL35;MRPL32;MRPL4;MRPL3;TRMT112;MRPL2;MTRF1;MRPL40;MRPL9;CHCHD1;MRPS28;MRPS27;MRPS24;MRPS22;MRPL49;MRPS18B;MRPS21;MRPL47;MRPL48;MRPS7;MRPL46;MRPS6;MRPL43;MRPS18C;OXA1L;MRPL50;MRPL51;ETF1;AURKAIP1;MRRF;MRPS35;MRPS36;MRPL18;MRPL19;MRPS34;MRPL17;MRPL14;MRPL13;MRPL57;MRPL10;MRPL11;MRPL55;MRPL20;PTCD3;MRPL27;MRPL24;MRP…
regulation of apoptotic process (GO:0042981)	305/742	1.8183e-10	3.66482e-08	0	0	1.6307	36.5734	ANKLE2;TRIO;ARL6IP1;ARAF;PHB2;CCAR2;AQP1;IFIT2;TP53AIP1;PREX1;USP17L4;USP17L5;LGALS1;RPS6KA1;ARL6IP5;KDR;TNFSF10;SKP2;MED1;ACTN4;MIF;TIAM2;VDAC1;UBA52;RNF122;ATF4;BEX2;ANP32A;PRKDC;DCUN1D3;GATA6;BCL10;PIK3R1;MTDH;PRDX3;APH1A;ABR;PRDX2;APH1B;TP53BP2;FADD;NKX2-5;ZNF268;PLK3;CREBBP;JUN;PRELID1;XBP1;TSLP;GADD45B;GADD45A;SIAH2;PLK1;CIDEA;BRAF;PA2G4;PTK2;GADD45G;MLLT11;SETX;HNRNPK;PPT1;ANP32E;ATM;ANP32…
protein deubiquitination (GO:0016579)	130/267	2.26607e-10	4.41506e-08	0	0	2.1997	48.8505	OTUD4;OTUD5;KDM1B;CCP110;KEAP1;TOMM20;ACTB;CDC20;PSMD8;PSMD9;PSMD6;USP17L4;PSMD7;USP17L5;PSMD4;PSMD5;PSMD3;EP300;SKP2;ATXN7L3;MAP3K7;USP7;USP5;USP3;YOD1;HCFC1;RNF128;HGS;PSME1;UBA52;PSMD10;ENY2;PSMD12;VCP;PSMD11;PSMD14;PSMD13;HIF1A;SNX3;VCPIP1;RHOT1;UBB;ATXN7;UBC;RIPK1;SMAD1;SMAD4;SMAD3;SMURF2;SIAH2;INO80;ESR1;NFKBIA;CDK1;MDM2;MDM4;BAP1;USP37;WDR48;USP38;USP31;USP32;USP34;PTEN;ARRB2;MYSM1;BABAM1;…
cellular protein modification process (GO:0006464)	401/1025	6.00803e-10	1.1328e-07	0	0	1.50569	31.97	PGAP1;MAML1;GMFG;ARAF;DCAF5;DCAF4;DCAF6;PSMD8;PSMD9;PSMD6;NUB1;PSMD7;PSMD4;PSMD5;AKT3;PSMD3;PRKCH;WSB1;CSNK2A1;WSB2;CEL;ADPRH;PSME1;PRKD2;PADI4;UBA52;MTMR2;MTMR3;RPN2;PRKDC;PDGFB;COPS7B;COPS7A;MTMR4;HIF1A;MTMR6;ST3GAL1;CDK17;PLK4;B3GALNT1;CDK19;ICMT;FUCA2;PMM2;PLK1;EIF2AK3;FN1;EIF2AK2;ABCA7;BRAF;EIF2AK4;FAM220A;CDK13;CDK16;ARF4;PIGU;PRKAG1;HIF3A;WDR45;TRIOBP;IKBKB;UBL5;TIMP1;DUSP4;ANXA1;DUSP1;SIR…
regulation of mRNA stability (GO:0043488)	80/146	6.80046e-10	1.24215e-07	0	0	2.80079	59.1216	FMR1;HNRNPU;HSPB1;YBX1;ELAVL1;PSMD8;EIF4ENIF1;PSMD9;PSMD6;PSMD7;XPO1;PSMD4;PSMD5;PSMD3;METTL3;RC3H1;RC3H2;PSMA6;CARHSP1;PSMA4;XRN1;PSMA1;PSMA2;THRAP3;MAPKAPK2;PSME1;PABPC1;UBA52;DCP2;PSMD10;PSMD12;PSMD11;SET;ANP32A;PSMD14;ROCK1;PSMD13;ROCK2;ZFP36L2;PSMB10;TBRG4;FXR1;EXOSC7;PSMB6;PSMB7;EXOSC5;PSMB4;LARP1;EXOSC4;PSMB5;UBB;PSMB2;PSMB3;EXOSC9;UBC;PSMB1;IGF2BP1;IGF2BP2;RPS27A;EXOSC1;HSPA8;NPM1;YTHDF1;…
regulation of primary metabolic process (GO:0080090)	73/130	8.6659e-10	1.49833e-07	0	0	2.95773	61.7173	SERPINA3;CHD9;IRS2;PSMD8;PSMD9;PSMD6;PSMD7;PSMD4;PSMD5;PSMD3;TNFAIP8L3;BBS4;MED1;SREBF1;PRKAB2;NCOA6;ELOVL6;LSS;NCOR2;PSMA6;PSMA4;PSMA1;TBL1XR1;PSMA2;PSME1;MVD;PPARG;PLPP1;CERS2;PSMD10;IDI1;PSMD12;PSMD11;MVK;PSMD14;PSMD13;ROCK2;ODC1;GPS2;HMGCR;ADIPOR1;OAZ1;OAZ2;PSMB10;PSMB6;PSMB7;PSMB4;PSMB5;PSMB2;PSMB3;TGS1;PMVK;PSMB1;SC5D;LDLR;FDFT1;FDPS;NQO1;CREBBP;NFYC;ABCA7;NR1D2;PSMB8;PSMB9;SQLE;PSMC5;PSMC6…
proteasome-mediated ubiquitin-dependent protein catabolic process (GO:0043161)	149/321	8.71568e-10	1.49833e-07	0	0	2.00948	41.9192	RB1;UBXN2A;CCNF;LTN1;AUP1;CDC20;PSMD8;PSMD9;PSMD6;CDC23;PSMD7;PSMD4;PTTG1;PSMD5;CDC26;CDC27;PSMD3;TRIM25;SKP2;SKP1;FBXW5;FBXW7;UBE4A;YOD1;DNAJB14;UBE4B;RBX1;RNF126;TBL1XR1;PSME1;PLAA;RBCK1;UBA52;RNF122;PSMD10;PSMD12;VCP;ANAPC15;PSMD11;ANAPC16;CUL5;PSMD14;PSMD13;CUL3;CUL2;SEL1L;CUL1;AGAP3;UBR1;ANAPC10;HSP90B1;CCNB1;UBB;PCBP2;UBC;ANKZF1;SMURF2;UBE2B;RHBDD2;UBE2C;WFS1;SIAH2;PLK1;FBXO39;BFAR;UBE2A;AP…
regulation of mitotic cell cycle phase transition (GO:1901990)	97/188	9.11399e-10	1.52204e-07	0	0	2.46555	51.323	CCP110;CDC20;PSMD8;PSMD9;PSMD6;CDC23;PSMD7;PSMD4;PPP2R1A;PSMD5;CDC26;CDC27;PSMD3;TMEM14B;SKP1;CEP135;CSNK1E;TUBA4A;AKAP9;PSME1;UBA52;PSMD10;PSMD12;ANAPC15;PSMD11;ANAPC16;PSMD14;PSMD13;CUL3;CUL1;HMMR;ANAPC10;ZFP36L2;CCNB1;UBB;UBD;UBC;PLK4;UBE2C;PLK1;MAD2L1BP;INO80;ANLN;TPX2;RGCC;UBE2S;ID2;CDC16;CDK1;CEP57;CETN2;ACTR1A;PCM1;TUBA1A;CEP290;TUBB;DYNLL1;TUBG1;CKAP5;HAUS2;SIRT2;PSMA6;PSMA4;PSMA1;PSMA2;C…
ribosomal small subunit biogenesis (GO:0042274)	31/40	1.05091e-09	1.70627e-07	0	0	7.92689	163.877	LTV1;MRPS11;WDR3;TSR3;RPS27L;SNU13;PWP2;RPS15;RRP7A;EMG1;RPS17;RPS16;NOB1;RPS19;RRP36;NOM1;NOP14;NPM1;RPS7;UTP4;RIOK3;RPS6;RPSA;DDX52;MRPS7;RPS25;RPS28;LSM6;RPS27;SRFBP1;RPS24
negative regulation of G2/M transition of mitotic cell cycle (GO:0010972)	44/66	1.2886e-09	2.03564e-07	0	0	4.60832	94.331	AVEN;PSMD10;PSMD12;PSMD11;PSMD14;PSMD13;CUL1;AURKB;PSMB10;AURKA;PSMD8;PSMB6;PSMD9;PSMB7;PSMD6;PSMB4;PSMD7;PSMB5;PSMD4;PSMB2;PSMD5;PSMB3;CHEK1;PSMD3;PSMB1;CDK5RAP3;SKP1;USP47;INTS3;PSMB8;RBX1;PSMB9;PSMA6;PSMC5;PSMA4;PSMC6;PSMA1;PSMA2;PSMC4;PSMC1;PSMC2;CHMP4C;PSME1;NABP1
mitochondrial respiratory chain complex assembly (GO:0033108)	55/90	1.5543e-09	2.39076e-07	0	0	3.62405	73.5038	NDUFA11;NDUFA12;NDUFA10;IMMP2L;UQCRFS1;ACAD9;NDUFC2;NDUFC1;BCS1L;OXA1L;NDUFS8;NDUFS7;SDHAF2;NDUFS6;NDUFS5;NDUFS4;TMEM126A;NDUFS2;TMEM126B;SMIM20;NDUFB9;NDUFB8;NDUFB7;COX16;NDUFB10;NDUFB6;NDUFB11;NDUFB5;NDUFB4;COX17;NDUFB3;NDUFB2;NDUFB1;FOXRED1;SAMM50;NDUFV3;NDUFV2;NDUFV1;NDUFA9;COA3;NDUFA7;COA1;NDUFA6;TIMMDC1;UQCC2;NDUFA3;NDUFA2;NDUFA1;NDUFAF6;NDUFAF7;NDUFAF4;LYRM7;NDUFAB1;NDUFAF3;NDUFAF1
regulation of cellular amine metabolic process (GO:0033238)	36/51	3.81525e-09	5.71798e-07	0	0	5.52544	107.107	PSMD10;PSMD12;PSMD11;PSMD14;PSMD13;ODC1;OAZ1;OAZ2;PSMB10;PSMD8;PSMB6;PSMD9;PSMB7;PSMD6;PSMB4;PSMD7;PSMB5;PSMD4;PSMB2;PSMD5;PSMB3;PSMD3;PSMB1;NQO1;PSMB8;PSMB9;PSMA6;PSMC5;PSMA4;PSMC6;PSMA1;PSMA2;PSMC4;PSMC1;PSMC2;PSME1
protein-containing complex assembly (GO:0065003)	126/267	4.94514e-09	7.22608e-07	0	0	2.06954	39.5797	PDCD6;CLDN1;TNF;GOLGA2;PPP2R1A;EP300;SKP1;MEN1;MAGI1;NSF;TLE4;CARD10;TLE3;TLE2;TLE1;TRAPPC2L;DNAJB14;CD2AP;RBX1;PYGO2;TBC1D20;PARD3;CSNK2B;GEMIN5;PREB;LLGL1;PPID;KMT2D;SAR1B;PEF1;TUBGCP2;CUL3;CUL1;TGFA;MEFV;SLC9A1;SLC9A3R2;SLC9A3R1;SCFD1;ZNHIT6;TSPAN4;SNX9;RIPK1;FADD;SEC31A;GSDMD;TRAPPC3;CREBBP;TRAPPC1;ST13;TRAPPC4;TRAPPC5;FN1;CHCHD10;TRAPPC9;BCL9;DLG4;MDM2;MDM4;NDUFAF1;TUBGCP4;CNIH2;CNIH3;FERMT2…
pre-replicative complex assembly (GO:0036388)	42/64	6.27792e-09	8.94986e-07	0	0	4.39739	83.0502	PSMD10;PSMD12;PSMD11;MCM7;PSMD14;PSMD13;GMNN;PSMB10;PSMD8;PSMB6;PSMD9;PSMB7;PSMD6;PSMB4;PSMD7;PSMB5;PSMD4;PSMB2;UBB;PSMD5;PSMB3;PSMD3;ORC2;PSMB1;UBC;RPS27A;PSMB8;PSMB9;PSMA6;PSMC5;PSMA4;PSMC6;PSMA1;PSMA2;PSMC4;PSMC1;PSMC2;MCM3;PSME1;MCM4;MCM5;UBA52
regulation of G2/M transition of mitotic cell cycle (GO:0010389)	79/149	6.54838e-09	9.11316e-07	0	0	2.60655	49.118	AVEN;CEP57;CETN2;CCP110;PSMD8;PSMD9;PSMD6;ACTR1A;PCM1;PSMD7;TUBA1A;CCND1;PSMD4;PPP2R1A;PSMD5;PSMD3;CEP290;SKP1;USP47;CEP135;TUBB;CSNK1E;CDC25C;DYNLL1;TUBG1;CKAP5;TUBA4A;HAUS2;RBX1;PSMA6;PSMA4;RAD51C;PSMA1;PSMA2;AKAP9;PSME1;CEP63;MAPRE1;PAFAH1B1;SDCCAG8;PSMD10;PSMD12;PSMD11;PSMD14;PSMD13;DCTN3;CUL1;HMMR;PSMB10;AURKA;PSMB6;PSMB7;CCNB1;PSMB4;PSMB5;PSMB2;PSMB3;PSMB1;PCNT;CLASP1;BRD4;PLK4;DYNC1H1;RCC2…
regulation of cell cycle phase transition (GO:1901987)	56/95	7.24832e-09	9.85265e-07	0	0	3.31108	62.0579	CDKN1A;CDC20;PSMD8;PSMD9;PSMD6;CDC23;PSMD7;PSMD4;PSMD5;CDC26;CDC27;PSMD3;SKP1;FBXW7;PSMA6;PSMA4;PSMA1;PSMA2;PSME1;PSMD10;PSMD12;ANAPC15;PSMD11;ANAPC16;PSMD14;PSMD13;CUL1;ANAPC10;PSMB10;PSMB6;PSMB7;CCNB1;FZR1;PSMB4;PSMB5;PSMB2;PSMB3;UBD;PSMB1;BUB3;UBE2C;PLK1;PSMB8;PSMB9;PSMC5;PSMC6;TFAP4;PSMC4;UBE2S;PSMC1;CDC16;PSMC2;CDK1;NEK10;MAD2L1;TAF1
regulation of cellular amino acid metabolic process (GO:0006521)	37/54	8.48765e-09	1.10979e-06	0	0	5.01093	93.1263	PSMD10;PSMD12;PSMD11;PSMD14;PSMD13;ODC1;OAZ1;OAZ2;PSMB10;PSMD8;PSMB6;PSMD9;PSMB7;PSMD6;PSMB4;PSMD7;PSMB5;PSMD4;PSMB2;PSMD5;PSMB3;PSMD3;PSMB1;NQO1;PSMB8;PSMB9;BCKDK;PSMA6;PSMC5;PSMA4;PSMC6;PSMA1;PSMA2;PSMC4;PSMC1;PSMC2;PSME1
ubiquitin-dependent protein catabolic process (GO:0006511)	158/354	8.54412e-09	1.10979e-06	0	0	1.86951	34.7318	UBE3C;UBXN2A;KEAP1;UBE2L6;CDC20;PSMD8;PSMD9;NUB1;PSMD6;CDC23;PSMD7;RNF114;PSMD4;PTTG1;PSMD5;CDC26;CDC27;PSMD3;TRIM25;SKP2;FBXO7;FBXW5;FBXW7;RC3H1;UBE4A;UBE4B;FBXO10;FBXO11;RC3H2;RNF40;RBX1;RNF126;RNF128;TBL1XR1;PSME1;PLAA;RBCK1;SQSTM1;RNF122;VPS28;PSMD10;PSMD12;VCP;ANAPC15;PSMD11;ANAPC16;PSMD14;PSMD13;CUL3;AGAP3;ANAPC10;UBD;PCBP2;XBP1;UBE2H;NDFIP1;UBE2I;SMURF2;UBE2B;UBE2C;SIAH2;PLK1;BFAR;UBE2A;NT…
negative regulation of cell cycle G2/M phase transition (GO:1902750)	38/57	1.72372e-08	2.19025e-06	0	0	4.60474	82.3152	AVEN;PSMD10;PSMD12;PSMD11;PSMD14;PSMD13;CUL1;PSMB10;AURKA;PSMD8;PSMB6;PSMD9;PSMB7;PSMD6;PSMB4;PSMD7;PSMB5;PSMD4;PSMB2;PSMD5;PSMB3;PSMD3;PSMB1;SKP1;USP47;PSMB8;RBX1;PSMB9;PSMA6;PSMC5;PSMA4;PSMC6;PSMA1;PSMA2;PSMC4;PSMC1;PSMC2;PSME1
regulation of phosphorylation (GO:0042325)	68/125	1.86729e-08	2.32219e-06	0	0	2.75285	48.9903	APP;NRP1;ANKLE2;CDKN1A;NUP107;NUP188;MCM7;IFNA2;TESK1;PRKAG1;HSPB1;SLC2A6;IKBKB;FLCN;EP300;SEC13;EMP2;MIF;ATG14;DYNLL1;JMJD8;SIRT1;SIRT2;NUP93;NUP50;NDUFS4;PHIP;ANG;ITGA6;NUP54;NUP98;ROPN1;NUP205;POM121;SEH1L;ROCK1;BCL10;PSEN1;HIF1A;NUP160;CORO1C;POM121C;NUP85;CCL5;TPR;NUP88;FNIP1;FNIP2;RAE1;RANBP2;NUP155;CDKN2A;PTGES3;STAT2;FN1;NUP153;INHBA;PTK2;PML;BMP4;CCDC88A;FER;EIF6;CCDC88C;PIN1;PLXNB2;NUP3…
regulation of cellular ketone metabolic process (GO:0010565)	41/64	2.69231e-08	3.27844e-06	0	0	4.10508	71.5527	PSMD10;PANK2;PSMD12;PSMD11;PSMD14;PSMD13;ODC1;OAZ1;OAZ2;PSMB10;PSMD8;PSMB6;PSMD9;PSMB7;PSMD6;PSMB4;PSMD7;PSMB5;PSMD4;PSMB2;PSMD5;PSMB3;PSMD3;PSMB1;PDK2;NQO1;SIRT5;SIRT1;PSMB8;PSMB9;NCOR2;PSMA6;PSMC5;PSMA4;PSMC6;PSMA1;PSMA2;PSMC4;PSMC1;PSMC2;PSME1
regulation of transcription from RNA polymerase II promoter in response to hypoxia (GO:0061418)	46/75	2.84478e-08	3.39342e-06	0	0	3.65425	63.4932	PSMD10;PSMD12;PSMD11;PSMD14;PSMD13;CUL2;HIF3A;HIF1A;PSMB10;PSMD8;PSMB6;PSMD9;PSMB7;PSMD6;PSMB4;PSMD7;PSMB5;PSMD4;PSMB2;UBB;PSMD5;PSMB3;PSMD3;PSMB1;UBC;EP300;RPS27A;EGLN1;CREBBP;EGLN2;SIRT2;PSMB8;RBX1;PSMB9;VEGFA;PSMA6;PSMC5;PSMA4;PSMC6;PSMA1;PSMA2;PSMC4;PSMC1;PSMC2;PSME1;UBA52
regulation of mitotic cell cycle (GO:0007346)	89/178	3.11621e-08	3.64285e-06	0	0	2.31029	39.9311	FOXA1;RB1;APP;BTG2;HNRNPU;MKI67;CKS1B;CDC20;PSMD8;PSMD9;PSMD6;CDC23;PSMD7;PSMD4;PSMD5;CDC26;CDC27;PSMD3;PIM3;CDK5RAP3;DLGAP5;SKP1;DUSP3;ANGEL2;CDC25C;SIRT1;RNF40;PSMA6;PSMA4;PSMA1;PSMA2;TAL1;PSME1;CKS2;HECA;SIK1;OBSL1;PSMD10;PSMD12;ANAPC15;PSMD11;ANAPC16;PSMD14;PSMD13;CUL1;PDXP;IQGAP1;ANAPC10;PSMB10;PSMB6;SLC9A3R1;PSMB7;BRINP2;CCNB1;FZR1;PSMB4;PSMB5;PSMB2;PSMB3;UBD;PSMB1;BUB3;ZNF268;RNF20;CDK11A;…
antigen processing and presentation of exogenous peptide antigen via MHC class I, TAP-dependent (GO:0002479)	45/73	3.2237e-08	3.69461e-06	0	0	3.70213	63.8623	PSMD10;PSMD12;PSMD11;PSMD14;PSMD13;PSMB10;IKBKB;PSMD8;PSMB6;PSMD9;PSMB7;PSMD6;PSMB4;PSMD7;PSMB5;PSMD4;PSMB2;PSMD5;PSMB3;PSMD3;PSMB1;ITGAV;B2M;PDIA3;HLA-B;TAP2;CYBA;HLA-A;HLA-F;HLA-G;PSMB8;HLA-E;TAPBP;PSMB9;PSMA6;PSMC5;PSMA4;PSMC6;PSMA1;PSMA2;PSMC4;PSMC1;PSMC2;PSME1;VAMP3
regulation of transcription from RNA polymerase II promoter in response to stress (GO:0043618)	51/87	4.34006e-08	4.87839e-06	0	0	3.26473	55.3463	HIF3A;PSMD8;PSMD9;PSMD6;PSMD7;PSMD4;PSMD5;CHEK1;PSMD3;EP300;RBX1;PSMA6;PSMA4;PSMA1;PSMA2;PSME1;UBA52;ATF4;PSMD10;PSMD12;PSMD11;PSMD14;PSMD13;CUL2;HIF1A;PSMB10;PSMB6;PSMB7;PSMB4;MAPK7;PSMB5;PSMB2;UBB;BAG3;PSMB3;PSMB1;UBC;RPS27A;EGLN1;CREBBP;EGLN2;INO80;PSMB8;PSMB9;VEGFA;PSMC5;PSMC6;PSMC4;PSMC1;PSMC2;HSPA1A
antigen processing and presentation of exogenous peptide antigen via MHC class I (GO:0042590)	47/78	4.4463e-08	4.90352e-06	0	0	3.49288	59.1296	PSMD10;PSMD12;PSMD11;PSMD14;PSMD13;IFI30;PSMB10;IKBKB;PSMD8;PSMB6;PSMD9;PSMB7;PSMD6;PSMB4;PSMD7;PSMB5;PSMD4;PSMB2;PSMD5;PSMB3;PSMD3;PSMB1;ITGAV;B2M;PDIA3;HLA-B;TAP2;CYBA;LNPEP;HLA-A;HLA-F;HLA-G;PSMB8;HLA-E;TAPBP;PSMB9;PSMA6;PSMC5;PSMA4;PSMC6;PSMA1;PSMA2;PSMC4;PSMC1;PSMC2;PSME1;VAMP3
interleukin-1-mediated signaling pathway (GO:0070498)	54/94	4.59368e-08	4.97224e-06	0	0	3.11175	52.5761	IKBKB;PSMD8;RPS6KA4;PSMD9;PSMD6;PSMD7;PSMD4;PSMD5;PSMD3;MAP3K7;SKP1;IRAK3;IRAK4;RBX1;PSMA6;PSMA4;PSMA1;PSMA2;PELI1;PSME1;UBE2V1;PLCB1;SQSTM1;UBA52;PSMD10;PSMD12;PSMD11;PSMD14;PSMD13;PELI2;CUL1;PSMB10;RELA;PSMB6;PSMB7;PSMB4;PSMB5;PSMB2;UBB;PSMB3;PSMB1;UBC;RPS27A;PSMB8;PSMB9;NFKBIA;PSMC5;PSMC6;PSMC4;PSMC1;TOLLIP;PSMC2;TAB2;MYD88
negative regulation of mitotic cell cycle phase transition (GO:1901991)	53/92	5.36123e-08	5.69753e-06	0	0	3.13214	52.4366	AVEN;RB1;CDKN1A;JADE1;PTEN;PSMD8;PSMD9;PSMD6;PSMD7;PSMD4;PSMD5;PSMD3;DACT1;SKP1;USP47;RBX1;PSMA6;PSMA4;SLFN11;PSMA1;PSMA2;PSME1;PSMD10;PSMD12;PSMD11;PSMD14;PSMD13;DCUN1D3;CUL1;PSMB10;ZFP36L2;AURKA;PSMB6;PSMB7;PSMB4;PSMB5;PSMB2;PSMB3;PSMB1;BRD7;CDKN2A;PSMB8;PSMB9;DLG1;PSMC5;PSMC6;RGCC;APC;CDK4;PSMC4;PSMC1;PSMC2;CDK2AP2
endoplasmic reticulum to Golgi vesicle-mediated transport (GO:0006888)	91/185	5.91389e-08	6.17262e-06	0	0	2.23649	37.2228	ARF4;PGAP1;PDCD6;PROS1;MIA3;IER3IP1;USE1;GOLGA2;NRBP2;ACTR1A;CAPZB;TMED3;TMED2;TMED7;TMED6;CTSC;TMED4;NSF;RAB2A;COG8;SEC13;TMED9;TICAM2;TRAPPC2L;COG4;COG2;COG1;ANK2;ANK3;ARFGAP3;DYNLL1;DYNLL2;NRBP1;ARFGAP1;BET1L;COPZ1;DYNC1LI2;F8;TBC1D20;TRAPPC6B;GORASP1;PREB;KDELR3;CTAGE15;TRAPPC3L;DCTN6;RAB1A;LMAN2L;PEF1;SAR1B;CUL3;RAB1B;DCTN3;GOSR1;USO1;TGFA;TEX261;LMAN1;SCFD1;BGLAP;LMAN2;CD59;WHAMM;YKT6;SPTBN…
modification-dependent protein catabolic process (GO:0019941)	97/201	7.24879e-08	7.43319e-06	0	0	2.15533	35.4333	UBE3C;KEAP1;UBE2L6;CDC20;PSMD9;NUB1;CDC23;RNF114;PTTG1;CDC26;CDC27;PSMD3;LONP1;TRIM25;FBXO7;RC3H1;UBE4A;UBE4B;FBXO10;FBXO11;RC3H2;RNF40;RBX1;RNF126;RNF128;UBA52;SQSTM1;ANAPC15;PSMD11;ANAPC16;PSMD14;PSMD13;CUL3;ANAPC10;UBB;UBD;UBC;XBP1;UBE2H;NDFIP1;UBE2I;SMURF2;UBE2B;UBE2C;SIAH2;PLK1;BFAR;ISG15;UBE2A;NTAN1;COPS3;UBE2S;TOLLIP;CDC16;MDM2;UBA1;UBE2K;RNF11;PPP1R11;HERPUD1;ARIH1;UBL7;RNF168;RNF167;UBE2…
COPII-coated vesicle budding (GO:0090114)	43/70	7.5133e-08	7.5716e-06	0	0	3.66766	60.1643	RAB1A;PEF1;SAR1B;PDCD6;CUL3;RAB1B;USO1;TGFA;MIA3;GOLGA2;PPP6C;LMAN1;SCFD1;PPP6R1;PPP6R3;TMED2;SCAP;CD59;SEC23B;CTSC;SEC31A;NSF;TRAPPC3;SEC13;SEC24B;TRAPPC2L;SEC24A;TRAPPC1;TRAPPC4;TRAPPC5;TRAPPC9;F8;SEC23IP;TBC1D20;TRAPPC6B;VAPB;GORASP1;COL7A1;PREB;CNIH2;SEC24D;CNIH3;BET1
cellular response to hypoxia (GO:0071456)	68/131	2.09826e-07	2.0787e-05	0	0	2.4896	38.2825	ACAA2;HIF3A;AQP1;PSMD8;NPEPPS;PSMD9;PSMD6;PSMD7;PSMD4;FAM162A;PSMD5;PSMD3;EP300;SIRT1;SIRT2;RBX1;PSMA6;PSMA4;PSMA1;PSMA2;PSME1;ADAM8;CARD16;UBA52;PSMD10;PSMD12;PSMD11;PSMD14;PSMD13;CUL2;GATA6;HIF1A;PSMB10;PSMB6;PSMB7;PSMB4;PSMB5;UBB;PSMB2;PSMB3;UBC;LMNA;PSMB1;PGK1;UBQLN1;RPS27A;EGLN1;PLK3;CREBBP;EGLN2;BAD;MTOR;PSMB8;HIPK2;PSMB9;VEGFA;SLC8A3;PSMC5;RGCC;PSMC6;PSMC4;PSMC1;PSMC2;MDM2;HYOU1;MDM4;STUB1…
COPII vesicle coating (GO:0048208)	39/63	2.24964e-07	2.12083e-05	0	0	3.74062	57.2589	RAB1A;PEF1;SAR1B;PDCD6;CUL3;RAB1B;USO1;TGFA;GOLGA2;PPP6C;LMAN1;SCFD1;PPP6R1;PPP6R3;TMED2;CD59;CTSC;SEC31A;NSF;TRAPPC3;SEC13;SEC24B;TRAPPC2L;SEC24A;TRAPPC1;TRAPPC4;TRAPPC5;TRAPPC9;F8;SEC23IP;TBC1D20;TRAPPC6B;GORASP1;COL7A1;PREB;CNIH2;SEC24D;CNIH3;BET1
vesicle coating (GO:0006901)	39/63	2.24964e-07	2.12083e-05	0	0	3.74062	57.2589	RAB1A;PEF1;SAR1B;PDCD6;CUL3;RAB1B;USO1;TGFA;GOLGA2;PPP6C;LMAN1;SCFD1;PPP6R1;PPP6R3;TMED2;CD59;CTSC;SEC31A;NSF;TRAPPC3;SEC13;SEC24B;TRAPPC2L;SEC24A;TRAPPC1;TRAPPC4;TRAPPC5;TRAPPC9;F8;SEC23IP;TBC1D20;TRAPPC6B;GORASP1;COL7A1;PREB;CNIH2;SEC24D;CNIH3;BET1
vesicle targeting, rough ER to cis-Golgi (GO:0048207)	39/63	2.24964e-07	2.12083e-05	0	0	3.74062	57.2589	RAB1A;PEF1;SAR1B;PDCD6;CUL3;RAB1B;USO1;TGFA;GOLGA2;PPP6C;LMAN1;SCFD1;PPP6R1;PPP6R3;TMED2;CD59;CTSC;SEC31A;NSF;TRAPPC3;SEC13;SEC24B;TRAPPC2L;SEC24A;TRAPPC1;TRAPPC4;TRAPPC5;TRAPPC9;F8;SEC23IP;TBC1D20;TRAPPC6B;GORASP1;COL7A1;PREB;CNIH2;SEC24D;CNIH3;BET1
regulation of cellular response to heat (GO:1900034)	46/79	2.59537e-07	2.40793e-05	0	0	3.21038	48.6834	GSK3B;CAMK2D;NUP205;POM121;HSP90AB1;NUP107;SEH1L;NUP188;CAMK2A;CCAR2;NUP160;BAG5;DNAJB6;POM121C;BAG3;NUP85;TPR;MLST8;EP300;MAPK1;NUP88;CD34;CAMK2G;RAE1;RANBP2;HSPA8;SEC13;CREBBP;NUP155;HSBP1;PTGES3;NUP153;SIRT1;MTOR;NUP93;DNAJC7;NUP50;RPA3;MAPKAPK2;NUP35;NUP54;ATM;NUP98;HSPA1B;HSPA1A;NUP37
regulation of canonical Wnt signaling pathway (GO:0060828)	115/253	2.76037e-07	2.52099e-05	0	0	1.92679	29.0997	SEMA5A;CTNND1;JADE1;CCAR2;PSMD8;PSMD9;PSMD6;STK11;PSMD7;PSMD4;SOX17;ADGRA2;PSMD5;TMEM88;PSMD3;FAM53B;SOX7;WLS;TLE4;CSNK1G3;TLE3;TLE2;TLE1;IGFBP4;SOX13;CSNK1E;DKK3;RBX1;CCNY;TBL1XR1;PSME1;CSNK1G2;PSMD10;PSMD12;VCP;PSMD11;PSMD14;PSMD13;TNKS;CUL3;PSEN1;STK3;SLC9A3R1;UBR5;NPHP3;NKX2-5;WWTR1;JUP;SMURF2;UBE2B;SIAH2;FUZ;MCC;BMP2;DAB2;WNK1;GNAQ;CCDC88C;PIN1;LMBR1L;GSK3B;GSK3A;DDX3X;CHD8;PTPRO;USP34;NRARP…
cellular response to interleukin-1 (GO:0071347)	77/155	3.60228e-07	3.23928e-05	0	0	2.27792	33.7964	CD40;CXCL8;CX3CL1;PSMD8;PYCARD;RPS6KA4;IKBKB;PSMD9;PSMD6;PSMD7;PSMD4;PSMD5;HYAL2;PSMD3;HYAL3;ANKRD1;SIRPA;MAP3K7;SKP1;UPF1;RC3H1;IRAK3;IRAK4;RBX1;PSMA6;PSMA4;PSMA1;PSMA2;PSME1;PELI1;XCL2;UBE2V1;PLCB1;SQSTM1;UBA52;PSMD10;CCL14;PSMD12;PSMD11;PSMD14;PSMD13;PELI2;CUL1;HIF1A;TANK;PSMB10;RELA;PSMB6;PSMB7;PSMB4;CCL8;PSMB5;UBB;PSMB2;PSMB3;CCL5;UBC;PSMB1;HAS2;CCL18;GBP2;RPS27A;GBP1;CCL15;DAB2IP;PSMB8;PSMB…
Fc-epsilon receptor signaling pathway (GO:0038095)	59/111	4.60619e-07	4.07927e-05	0	0	2.6152	38.1575	PIK3CB;PSMD8;IKBKB;PSMD9;PPP3CA;PSMD6;PSMD7;PSMD4;PSMD5;PSMD3;RAC1;MAP3K7;SKP1;VAV3;PDPK1;PSMA6;PSMA4;PIK3CA;PSMA1;PSMA2;PSME1;SOS1;PSMD10;PSMD12;PSMD11;PSMD14;PSMD13;CUL1;PIK3R2;BCL10;PIK3R1;PSMB10;RELA;PSMB6;MAPK9;PSMB7;PPP3R1;PSMB4;PSMB5;PSMB2;PSMB3;PSMB1;PLCG2;MAPK1;MAP2K7;PAK2;JUN;MAP3K1;NFATC2;PSMB8;PSMB9;FER;PSMC5;PSMC6;PSMC4;PSMC1;PSMC2;TAB2;CALM1
NIK/NF-kappaB signaling (GO:0038061)	43/74	6.84602e-07	5.8653e-05	0	0	3.19349	45.3298	PSMD10;PSMD12;PSMD11;PSMD14;PSMD13;CUL1;PSMB10;RELA;RELB;PSMD8;PSMB6;PSMD9;PSMB7;PSMD6;PSMB4;PSMD7;PSMB5;PSMD4;PSMB2;PSMD5;PSMB3;PSMD3;PSMB1;MAP3K7;SKP1;CARD10;TNFSF15;ZFP91;PSMB8;PSMB9;PSMA6;PSMC5;PSMA4;PSMC6;PSMA1;PSMA2;PSMC4;PSMC1;PSMC2;PSME1;REL;COPS8;BIRC3
Fc receptor signaling pathway (GO:0038093)	59/112	6.86442e-07	5.8653e-05	0	0	2.56567	36.4113	PIK3CB;PSMD8;IKBKB;PSMD9;PPP3CA;PSMD6;PSMD7;PSMD4;PSMD5;PSMD3;RAC1;MAP3K7;SKP1;VAV3;PDPK1;PSMA6;PSMA4;PIK3CA;PSMA1;PSMA2;PSME1;SOS1;PSMD10;PSMD12;PSMD11;PSMD14;PSMD13;CUL1;PIK3R2;BCL10;PIK3R1;PSMB10;RELA;PSMB6;MAPK9;PSMB7;PPP3R1;PSMB4;PSMB5;PSMB2;PSMB3;PSMB1;PLCG2;MAPK1;MAP2K7;PAK2;JUN;MAP3K1;NFATC2;PSMB8;PSMB9;FER;PSMC5;PSMC6;PSMC4;PSMC1;PSMC2;TAB2;CALM1
mitotic spindle organization (GO:0007052)	77/157	6.92397e-07	5.8653e-05	0	0	2.22065	31.4957	CEP126;NUP107;ZWILCH;KIF11;SMC3;CDC20;GOLGA2;XPO1;STMN1;NUF2;DLGAP5;NDEL1;ARHGEF10;SEC13;SPICE1;KIF23;TUBG2;DYNLL1;SMC1A;TUBG1;CKAP5;DYNLL2;RHOA;CLIP1;DYNC1LI2;KIF2A;KIFC1;EFHC1;BIRC5;KIF2C;NUP98;MAPRE1;ITGB3BP;PAFAH1B1;DCTN6;VCP;SEH1L;TNKS;CDCA8;TTK;PMF1;CENPA;NUP160;AURKB;AURKA;CENPC;CCNB1;KIF3B;NUP85;FLNA;BUB3;PCNT;BUB1;CLASP1;DYNC1I1;CLASP2;RANBP2;DYNC1H1;STIL;RCC2;PLK1;NDC80;RAB11A;TPX2;KIF1…
regulation of cellular response to stress (GO:0080135)	61/118	1.04221e-06	8.70248e-05	0	0	2.4666	33.9753	GSK3B;DYRK3;SMG1;NUP107;HSP90AB1;NUP188;CCAR2;CASP9;CHCHD2;MLST8;EP300;IER3;SEC13;HSBP1;SIRT1;NUP93;DNAJC7;NUP50;MAPKAPK2;NUP54;NUP98;NUPR1;AJUBA;ATF4;NUP205;POM121;CAMK2D;SEH1L;ROCK2;CAMK2A;NUP160;USP19;NUAK1;BAG5;POM121C;DNAJB6;BAG3;NUP85;TPR;MAPK1;NUP88;SLC38A2;CAMK2G;RAE1;RANBP2;HSPA8;CREBBP;NPM1;NUP155;AMFR;PTGES3;NUP153;MTOR;RSL1D1;RPA3;NUP35;ATM;HSPA1B;MBTPS2;HSPA1A;NUP37
ncRNA export from nucleus (GO:0097064)	26/38	1.4951e-06	0.000123082	0	0	4.98108	66.8128	NUP205;POM121;NUP107;SEH1L;NUP188;PHAX;NUP160;NOL6;POM121C;NUP85;TPR;NUP88;RAE1;RANBP2;NPM1;SEC13;NUP155;NUP153;TSC1;NUP93;XPOT;NUP50;NUP35;NUP54;NUP98;NUP37
regulation of hematopoietic stem cell differentiation (GO:1902036)	41/71	1.54951e-06	0.00012579	0	0	3.14564	42.0811	PSMD10;PSMD12;PSMD11;PSMD14;PRKDC;PSMD13;N4BP2L2;PSMB10;PSMD8;PSMB6;PSMD9;PSMB7;PSMD6;PSMB4;PSMD7;PSMB5;PSMD4;PSMB2;PSMD5;PSMB3;PSMD3;PSMB1;YTHDF2;LMO2;METTL3;EIF2AK2;PSMB8;PSMB9;PSMA6;ITCH;PSMC5;PSMA4;PSMC6;PSMA1;PSMA2;TAL1;PSMC4;PSMC1;PSMC2;PSME1;TCF3
negative regulation of canonical Wnt signaling pathway (GO:0090090)	79/165	1.67986e-06	0.000134504	0	0	2.11916	28.1781	LMBR1L;GSK3B;GSK3A;CHD8;CTNND1;PTPRO;JADE1;PSMD8;PSMD9;PSMD6;STK11;PSMD7;PSMD4;SOX17;PSMD5;TMEM88;MDK;PSMD3;SCYL2;ANKRD6;DACT1;TLE4;APC2;TLE3;TLE2;TLE1;IGFBP4;SOX13;DKK3;RBX1;GREM1;PSMA6;LATS2;PSMA4;PSMA1;SDHAF2;PSMA2;PSME1;PFDN5;RBMS3;PSMD10;PSMD12;PSMD11;PSMD14;PSMD13;HDAC1;CUL3;PRICKLE1;PSMB10;STK3;LRP6;PSMB6;SLC9A3R1;PSMB7;PSMB4;PSMB5;PSMB2;PSMB3;PSMB1;NPHP3;NKX2-5;WWTR1;TCF7L2;SIAH2;AMFR;DAB…
regulation of gene silencing by miRNA (GO:0060964)	39/67	2.10741e-06	0.000166457	0	0	3.20532	41.8938	NUP205;POM121;NUP107;SEH1L;NUP188;FMR1;ELAVL1;NUP160;FXR1;IPO8;POM121C;NUP85;POLR2C;POLR2D;TPR;NUP88;POLR2H;POLR2I;POLR2J;RAE1;POLR2K;POLR2L;RANBP2;SEC13;NUP155;STAT3;NUP153;WTIP;PUM2;NUP93;NUP50;AGO2;NUP35;NUP54;PPARG;NUP98;AJUBA;TNRC6A;NUP37
protein polyubiquitination (GO:0000209)	134/314	2.32052e-06	0.000180846	0	0	1.7215	22.3343	ANKRD39;UBE3C;CCNF;UBE2L6;PSMD8;PSMD9;NPEPPS;PSMD6;CDC23;PSMD7;RNF114;PSMD4;PSMD5;CDC26;CDC27;PSMD3;TRIM27;SKP2;FBXO7;SKP1;WSB1;FBXW5;FBXW8;FBXW7;FBXW9;RC3H1;MUL1;UBE4A;LMO7;UBE4B;FBXO10;FBXO11;RC3H2;RBX1;RNF41;RNF126;PSME1;RBCK1;UBE2V1;UBA52;PSMD10;ANAPC13;PSMD12;PSMD11;PSMD14;PSMD13;TNKS;CUL3;CUL1;ANAPC10;FBXO41;UBB;UBC;UBR5;LONRF1;UBE2H;SMURF2;UBE2B;UBE2C;SIAH2;LNPEP;BFAR;UBE2A;FBXO30;UBE2S;UB…
microtubule cytoskeleton organization involved in mitosis (GO:1902850)	64/128	2.55271e-06	0.000196324	0	0	2.30484	29.6825	CEP126;SETD2;NUP107;ZWILCH;KIF11;CDC20;XPO1;STMN1;NUF2;NUSAP1;DLGAP5;NDEL1;SEC13;TUBG2;DYNLL1;TUBG1;CKAP5;DYNLL2;CLIP1;DYNC1LI2;KIF2A;EFHC1;BIRC5;KIF2C;NUP98;MAPRE1;ITGB3BP;PAFAH1B1;DCTN6;SEH1L;TNKS;CDCA8;TTK;PMF1;CENPA;NUP160;AURKB;AURKA;CENPC;CCNB1;KIF3B;NUP85;BUB3;PCNT;BUB1;CLASP1;DYNC1I1;CLASP2;RANBP2;DYNC1H1;STIL;RCC2;PLK1;NDC80;KIF18A;RPS27;CENPH;CENPI;TAOK1;TACC3;CENPM;CENPO;MAD2L1;NUP37
regulation of purine nucleotide metabolic process (GO:1900542)	28/43	2.70481e-06	0.00020532	0	0	4.29188	55.024	NUP205;POM121;NUP107;SEH1L;NUP188;PRKAG1;HIF1A;SLC2A6;NUP160;POM121C;NUP85;TPR;EP300;NUP88;RAE1;RANBP2;SEC13;NUP155;NUP153;JMJD8;NUP93;LACC1;EIF6;NUP50;NUP35;NUP54;NUP98;NUP37
mRNA splicing, via spliceosome (GO:0000398)	119/274	3.00062e-06	0.000224855	0	0	1.77413	22.5611	HNRNPU;HNRNPR;CWC25;SNRPD2;CLP1;SNRPD1;MAGOH;SNRPD3;DDX17;SRRM2;SCAF11;METTL3;PRPF4B;ZCRB1;WBP11;SRRM1;WDR77;DDX39A;GEMIN4;SRSF2;GEMIN5;SRSF3;SNRPE;SRSF4;GEMIN7;SNRNP25;SNRPF;SRSF5;SNRPC;SRSF7;SRSF8;SF1;DHX8;RBM8A;YTHDC1;CWF19L2;SNU13;ZMAT2;PCBP2;SMN1;HSPA8;PRPF38A;CPSF1;ALYREF;CWC15;MAGOHB;LSM4;LSM3;LSM2;LSM8;LSM7;HNRNPK;LSM6;HNRNPF;HNRNPD;HNRNPC;CDK13;DDX42;PPWD1;YBX1;USP39;ELAVL1;PQBP1;SYNCRIP…
tRNA transport (GO:0051031)	25/37	3.40368e-06	0.00025183	0	0	4.78871	60.2929	NUP205;POM121;NUP107;SEH1L;NUP188;YBX1;TOMM20;NUP160;NOL6;POM121C;NUP85;TPR;NUP88;RAE1;RANBP2;SEC13;NUP155;NUP153;NUP93;XPOT;NUP50;NUP35;NUP54;NUP98;NUP37
regulation of translation (GO:0006417)	83/178	3.51366e-06	0.000256717	0	0	2.01557	25.3132	EIF4A2;APP;CYFIP1;RPL5;BTG2;DDX3X;FMR1;LTN1;HSPB1;YBX1;ELAVL1;GLE1;RBM3;RPS4X;EIF4ENIF1;RBM4;SYNCRIP;MTRF1;MTG1;MTG2;RPS6KA1;METTL18;EIF5B;TSFM;UPF1;METTL3;NSUN3;RPL13A;TSC1;LARP4B;MIF4GD;GEMIN5;ETF1;RPL26;EIF1B;DDX6;RPL10;PRKDC;NOLC1;RBM4B;RPS27L;MALSU1;PLD1;TYMS;MRPL13;FXR1;LARP1;IGF2BP1;IGF2BP2;PAIP2;EIF2B4;TRAP1;NPM1;YTHDF1;EIF2B2;PCIF1;EIF2AK3;SAMD4A;EIF2AK2;SAMD4B;UPF3A;EIF2AK4;EEF2;LARP4;P…
DNA-dependent DNA replication (GO:0006261)	64/129	3.57256e-06	0.000257798	0	0	2.26922	28.461	RPAIN;MCM7;GMNN;PSMD8;PSMD9;PSMD6;PSMD7;PSMD4;PSMD5;PSMD3;REV3L;POLE;RFC5;RFC4;RFC1;BAZ1A;PSMA6;PSMA4;PSMA1;PSMA2;PSME1;MCM3;MCM4;MCM5;UBA52;PSMD10;PSMD12;PSMD11;PSMD14;PSMD13;PRIM1;DDX23;DDX21;PSMB10;PSMB6;POLD4;PSMB7;PSMB4;WRN;CDC45;PSMB5;UBB;PSMB2;PSMB3;ORC2;UBC;POLD2;PSMB1;RPS27A;GINS2;GINS3;PSMB8;PSMB9;POLE4;PSMC5;PSMC6;RAD51;PSMC4;PSMC1;RPA3;PSMC2;RPA4;CDK2AP1;SSBP1
mRNA processing (GO:0006397)	128/300	3.91097e-06	0.000278776	0	0	1.72017	21.4191	TCERG1;HNRNPU;HNRNPR;CWC25;SNRPD2;CLP1;SNRPD1;MAGOH;SNRPD3;SRRM2;SCAF11;METTL3;PRPF4B;THOC3;THOC2;ZCRB1;WBP11;THOC7;SRRM1;THOC6;DDX39A;SARNP;ZC3H11A;SRSF2;GEMIN5;SRSF3;SNRPE;SRSF4;GEMIN7;SNRNP25;SNRPF;SRSF5;AURKAIP1;SNRPC;SRSF7;SRSF8;SF1;DHX8;RBM8A;YTHDC1;CWF19L2;SUPT4H1;SNU13;ZMAT2;PCBP2;HSPA8;PRPF38A;CPSF6;CPSF1;ALYREF;CWC15;MAGOHB;SUPT5H;LSM4;LSM3;LSM2;LSM8;LSM7;HNRNPK;LSM6;HNRNPF;HNRNPD;HNRNP…
negative regulation of programmed cell death (GO:0043069)	157/381	3.96847e-06	0.000279466	0	0	1.62188	20.1715	ANKLE2;ARL6IP1;ARAF;PARK7;TM7SF3;PHB2;AQP1;CCND2;RPS6KA1;KDR;PIM3;MED1;OSR1;MIF;THOC6;PPIF;VDAC1;PHIP;NUPR1;IL6ST;RAF1;UBA52;SQSTM1;PSMD10;PRKDC;GLO1;GATA6;PIK3R1;PSEN1;MTDH;HSP90B1;PRDX3;PRDX2;GRK5;UBB;BAG3;DDRGK1;UBC;RIPK1;NKX2-5;ZNF268;TXNDC5;PLK3;PRELID1;XBP1;STIL;CDSN;OPN3;TSLP;WFS1;SIAH2;PLK1;ASNS;BRAF;BFAR;DHCR24;PA2G4;SMAD6;PTK2;HIGD2A;SETX;BMP4;NFKBIA;DAB2;HNRNPK;PROC;IL7;PPT1;CDK1;MYD88…
RNA splicing, via transesterification reactions with bulged adenosine as nucleophile (GO:0000377)	110/251	4.21779e-06	0.000293488	0	0	1.8019	22.3006	HNRNPU;HNRNPR;CWC25;SNRPD2;CLP1;SNRPD1;MAGOH;SNRPD3;SRRM2;METTL3;PRPF4B;ZCRB1;WBP11;SRRM1;DDX39A;SRSF2;GEMIN5;SRSF3;SNRPE;SRSF4;GEMIN7;SNRNP25;SNRPF;SRSF5;SNRPC;SRSF7;SRSF8;SF1;DHX8;RBM8A;YTHDC1;CWF19L2;SNU13;ZMAT2;PCBP2;HSPA8;PRPF38A;CPSF1;ALYREF;CWC15;MAGOHB;LSM4;LSM3;LSM2;LSM8;LSM7;HNRNPK;LSM6;HNRNPF;HNRNPD;HNRNPC;DDX42;PPWD1;YBX1;USP39;ELAVL1;PQBP1;SYNCRIP;UBL5;RBM4;SART3;DHX15;DHX16;RBM17;RB…
T cell receptor signaling pathway (GO:0050852)	75/158	4.53129e-06	0.000311592	0	0	2.08364	25.6382	DENND1B;PIK3CB;CD3D;PSMD8;IKBKB;PSMD9;PSMD6;PSMD7;PSMD4;PSMD5;PSMD3;CTLA4;EIF2B1;MAP3K7;ICOSLG;SKP1;HLA-DPA1;NCK1;PDPK1;THEMIS;RC3H1;HLA-A;RC3H2;PSMA6;PSMA4;PIK3CA;PSMA1;PSMA2;PSME1;PRKD2;RBCK1;HLA-DQB2;HLA-DQB1;PSMD10;KHDRBS1;PSMD12;STOML2;PSMD11;PSMD14;PSMD13;CUL1;PIK3R2;BCL10;PIK3R1;THY1;PRAM1;PSMB10;RELA;PSMB6;PSMB7;PSMB4;PSMB5;PSMB2;PSMB3;INPP5D;PSMB1;PLCG2;PAK2;CD276;BTNL8;EIF2B4;EIF2B3;EIF…
positive regulation of canonical Wnt signaling pathway (GO:0090263)	64/130	4.96272e-06	0.000337292	0	0	2.23467	27.2933	SEMA5A;DDX3X;USP34;NRARP;CCAR2;PSMD8;PSMD9;PSMD6;PSMD7;PSMD4;ADGRA2;PSMD5;PSMD3;FAM53B;RSPO1;WLS;DACT1;CSNK1G3;USP47;ATP6AP2;CSNK1E;PPM1A;PSMA6;GPRC5B;PPM1B;PSMA4;PSMA1;TBL1XR1;PSMA2;PSME1;TMEM9;CSNK1G2;PSMD10;PSMD12;VCP;PSMD11;PSMD14;PSMD13;TNKS;XIAP;PSMB10;PSMB6;PSMB7;SCEL;PSMB4;PSMB5;PSMB2;TNKS2;PSMB3;UBR5;PSMB1;JUP;SMURF2;UBE2B;PSMB8;PSMB9;PSMC5;PSMC6;WNK1;PSMC4;PSMC1;GID8;PSMC2;PIN1
regulation of gene silencing by RNA (GO:0060966)	33/55	5.10172e-06	0.000338859	0	0	3.44995	42.0409	NUP205;POM121;NUP107;SEH1L;NUP188;FMR1;NUP160;IPO8;POM121C;NUP85;POLR2C;POLR2D;TPR;NUP88;POLR2H;POLR2I;POLR2J;RAE1;POLR2K;POLR2L;RANBP2;SEC13;NUP155;NUP153;PUM2;NUP93;NUP50;AGO2;NUP35;NUP54;NUP98;TNRC6A;NUP37
regulation of posttranscriptional gene silencing (GO:0060147)	33/55	5.10172e-06	0.000338859	0	0	3.44995	42.0409	NUP205;POM121;NUP107;SEH1L;NUP188;FMR1;NUP160;IPO8;POM121C;NUP85;POLR2C;POLR2D;TPR;NUP88;POLR2H;POLR2I;POLR2J;RAE1;POLR2K;POLR2L;RANBP2;SEC13;NUP155;NUP153;PUM2;NUP93;NUP50;AGO2;NUP35;NUP54;NUP98;TNRC6A;NUP37
mitotic nuclear membrane organization (GO:0101024)	31/51	6.72728e-06	0.000436899	0	0	3.56428	42.4482	ANKLE2;NUP205;POM121;NUP107;SEH1L;NUP188;PPP2R2A;NUP160;CCNB2;CCNB1;PPP2R1A;NUP85;LMNA;BANF1;LBR;SEC13;UBE2I;NUP155;IST1;SIRT2;NUP93;REEP4;CHMP2B;CHMP4C;CDK1;CHMP2A;CHMP4B;NUP35;NUP98;CHMP7;NUP37
mitotic nuclear membrane reassembly (GO:0007084)	31/51	6.72728e-06	0.000436899	0	0	3.56428	42.4482	ANKLE2;NUP205;POM121;NUP107;SEH1L;NUP188;PPP2R2A;NUP160;CCNB2;CCNB1;PPP2R1A;NUP85;LMNA;BANF1;LBR;SEC13;UBE2I;NUP155;IST1;SIRT2;NUP93;REEP4;CHMP2B;CHMP4C;CDK1;CHMP2A;CHMP4B;NUP35;NUP98;CHMP7;NUP37
negative regulation of ubiquitin-dependent protein catabolic process (GO:2000059)	25/38	7.07408e-06	0.000449434	0	0	4.42003	52.4174	RPL5;HSP90AB1;RPL11;TAF9;PARK7;CCAR2;BAG5;DDRGK1;TLK2;N4BP1;USP7;CAMLG;CSNK2A1;RPS7;RPL23;CSNK2A2;SGTA;KLHL40;PML;UCHL5;HIPK2;RYBP;WAC;EIF3H;TAF1
sterol biosynthetic process (GO:0016126)	25/38	7.07408e-06	0.000449434	0	0	4.42003	52.4174	IDI1;ACAA2;MVK;INSIG2;FAXDC2;INSIG1;MSMO1;HMGCR;HSD17B7;ACAT2;EBP;PMVK;SC5D;LBR;FDFT1;FDPS;G6PD;APOA4;DHCR24;APOA5;LSS;CH25H;SQLE;MVD;DHCR7
post-translational protein modification (GO:0043687)	143/345	7.2669e-06	0.000456721	0	0	1.6369	19.3681	APP;CSF1;LRR1;CCNF;KEAP1;DCAF5;DCAF4;DCAF6;PSMD8;PSMD9;NUB1;PSMD6;LGALS1;PSMD7;PSMD4;PSMD5;PSMD3;SKP2;FBXO7;SKP1;MEN1;RAB2A;WSB1;FBXW5;WSB2;FBXW8;FBXW7;IGFBP4;FBXW9;SHISA5;LMO7;ESCO2;FBXO10;FBXO11;RBX1;PSME1;OBSL1;PSMD10;PSMD12;PSMD11;CUL5;PSMD14;PSMD13;DCUN1D3;CUL3;CUL2;DCUN1D1;CUL1;COPS7B;COPS7A;HIF1A;LTBP1;FBXO41;KNG1;HSP90B1;STC2;UBD;IGFBP7;NAE1;UBE2F;ICMT;WFS1;ZBTB16;FUCA2;FN1;FBXO30;BMP4;CO…
neutrophil mediated immunity (GO:0002446)	193/488	8.11254e-06	0.000498566	0	0	1.51529	17.7623	CYFIP1;GMFG;LGALS3;PSMD6;PSMD7;PNP;FTH1;PSMD3;CPNE1;CPNE3;B2M;GOLGA7;HLA-B;MIF;SCAMP1;CSNK2B;MGST1;IQGAP1;CYB5R3;PRDX4;COMMD9;NEU1;S100A11;GSDMD;CTSA;JUP;XRCC5;FUCA1;FUCA2;SURF4;RAB27A;PA2G4;PRDX6;DERA;VNN1;TOLLIP;CYSTM1;CDK13;GPI;SERPINA3;SLC44A2;HEXB;MAGT1;ORM2;CTSS;TIMP2;CTSH;QSOX1;RAC1;CTSC;CCT2;SERPINB1;MANBA;ANXA2;TUBB;RHOG;COMMD3;ANO6;DYNLL1;RHOA;APRT;CEACAM3;PSMA2;PLEKHO2;ALDOA;PAFAH1B2;D…
tRNA export from nucleus (GO:0006409)	23/34	8.18859e-06	0.000498566	0	0	4.80488	56.2784	RANBP2;NUP205;POM121;SEC13;NUP107;SEH1L;NUP188;NUP155;NUP153;NUP160;NOL6;NUP93;POM121C;XPOT;NUP85;NUP50;TPR;NUP35;NUP88;NUP54;NUP98;RAE1;NUP37
tRNA-containing ribonucleoprotein complex export from nucleus (GO:0071431)	23/34	8.18859e-06	0.000498566	0	0	4.80488	56.2784	RANBP2;NUP205;POM121;SEC13;NUP107;SEH1L;NUP188;NUP155;NUP153;NUP160;NOL6;NUP93;POM121C;XPOT;NUP85;NUP50;TPR;NUP35;NUP88;NUP54;NUP98;RAE1;NUP37
nuclear membrane reassembly (GO:0031468)	32/54	1.02125e-05	0.00061538	0	0	3.34485	38.4387	ANKLE2;NUP205;POM121;NUP107;SEH1L;NUP188;UBXN2A;PPP2R2A;NUP160;CCNB2;CCNB1;PPP2R1A;NUP85;LMNA;BANF1;LBR;SEC13;UBE2I;NUP155;IST1;SIRT2;NUP93;REEP4;CHMP2B;CHMP4C;CDK1;CHMP2A;CHMP4B;NUP35;NUP98;CHMP7;NUP37
neutrophil degranulation (GO:0043312)	190/481	1.03756e-05	0.000618833	0	0	1.51191	17.3508	CYFIP1;ATP8A1;TMEM179B;GMFG;RAB3D;APEH;SRP14;PYCARD;LGALS3;PSMD6;PSMD7;PNP;FTH1;PSMD3;TOM1;CPNE1;COTL1;SIRPA;CPNE3;CAPN1;OSTF1;GYG1;B2M;GOLGA7;KCMF1;TICAM2;DGAT1;CD93;IST1;HLA-B;ATP11B;CYBA;ATP11A;MIF;SCAMP1;CLEC4C;CSNK2B;ADAM8;DSC1;SLC27A2;PPIA;ARL8A;FTL;PSMD12;VCP;PSMD11;PSMD14;BRI3;PSMD13;MGST1;IQGAP1;PSEN1;PLD1;CYB5R3;PRDX4;RAP1A;COMMD9;DPP7;NEU1;S100A11;AP1M1;TXNDC5;GSDMD;CTSA;HSPA8;RAB4B;TR…
regulation of carbohydrate catabolic process (GO:0043470)	27/43	1.12028e-05	0.00066142	0	0	3.87902	44.2183	NUP205;POM121;NUP107;SEH1L;NUP188;PRKAG1;HIF1A;SLC2A6;NUP160;POM121C;NUP85;TPR;EP300;NUP88;RAE1;RANBP2;SEC13;NUP155;NUP153;JMJD8;NUP93;EIF6;NUP50;NUP35;NUP54;NUP98;NUP37
neutrophil activation involved in immune response (GO:0002283)	191/485	1.22392e-05	0.000715384	0	0	1.50428	17.0147	CYFIP1;ATP8A1;TMEM179B;GMFG;RAB3D;APEH;SRP14;PYCARD;LGALS3;PSMD6;PSMD7;PNP;FTH1;PSMD3;TOM1;CPNE1;COTL1;SIRPA;CPNE3;CAPN1;OSTF1;GYG1;B2M;GOLGA7;KCMF1;TICAM2;DGAT1;CD93;IST1;HLA-B;ATP11B;CYBA;ATP11A;MIF;SCAMP1;CLEC4C;CSNK2B;ADAM8;DSC1;SLC27A2;PPIA;ARL8A;FTL;PSMD12;VCP;PSMD11;PSMD14;BRI3;PSMD13;MGST1;IQGAP1;PSEN1;PLD1;CYB5R3;PRDX4;RAP1A;COMMD9;DPP7;NEU1;S100A11;AP1M1;TXNDC5;GSDMD;CTSA;HSPA8;RAB4B;TR…
endomembrane system organization (GO:0010256)	89/199	1.28674e-05	0.000744654	0	0	1.86639	21.0171	ANXA8L1;UBXN2A;MIA3;SYNE1;GOLGA2;RAB43;LAPTM4B;GOLGA5;SERP1;FAM174B;TMED3;TMED2;TMED7;TMED6;TMED4;PLEKHJ1;RAB2A;SRGN;GOLGA8R;BCAS3;TMED9;GOLGA8T;TICAM2;EXOC8;FBXW8;COG4;TANGO2;VPS33B;COG2;GOLPH3L;COG1;GOLGA8J;ANK3;GOLGA8O;LEMD3;TMEM170A;NUP93;GOLGA8B;RAB30;TBC1D20;ALS2;GORASP1;TLCD2;OBSL1;SQSTM1;RAB1A;LMAN2L;TOR1AIP2;CDC42;LMAN1;SLC9A3R1;SYNGR2;BAG5;LMAN2;SPTSSB;SPTBN1;CLASP1;SEC31A;CLASP2;ARFGEF…
cholesterol biosynthetic process (GO:0006695)	23/35	1.70072e-05	0.000965115	0	0	4.40415	48.3659	IDI1;FDPS;G6PD;ACAA2;MVK;INSIG2;INSIG1;MSMO1;APOA4;DHCR24;HMGCR;HSD17B7;APOA5;LSS;ACAT2;SQLE;EBP;PMVK;SC5D;MVD;DHCR7;LBR;FDFT1
maturation of SSU-rRNA (GO:0030490)	23/35	1.70072e-05	0.000965115	0	0	4.40415	48.3659	NOP14;UTP4;RIOK3;RPS8;UTP3;MRPS11;WDR3;HEATR1;TSR3;NGDN;SNU13;DDX52;PWP2;RPS28;RPS16;LSM6;NOB1;RPS19;BMS1;TSR2;RRP36;SRFBP1;DCAF13
mitochondrial electron transport, ubiquinol to cytochrome c (GO:0006122)	11/12	1.75428e-05	0.000985939	0	0	25.246	276.465	UQCRB;UQCRQ;UQCRC1;CYCS;UQCRFS1;UQCR11;CYC1;UQCR10;UQCRC2;UQCRH;UQCRHL
regulation of stem cell differentiation (GO:2000736)	47/91	1.79033e-05	0.000996619	0	0	2.45859	26.8737	PSMD10;PSMD12;PSMD11;PSMD14;PRKDC;PSMD13;TACSTD2;HNRNPU;PSMB10;ZFP36L2;PSMD8;PSMB6;PSMD9;PSMB7;PSMD6;PSMB4;PSMD7;PSMB5;PSMD4;PSMB2;PSMD5;PSMB3;PSMD3;PSMB1;HES1;JAG1;YTHDF2;LMO2;METTL3;EIF2AK2;PSMB8;PSMB9;PSMA6;NUDT21;ITCH;PSMC5;PSMA4;PSMC6;PSMA1;PSMA2;TAL1;PSMC4;PSMC1;PSMC2;PSME1;OCIAD1;TCF3
mitotic cell cycle phase transition (GO:0044772)	92/209	2.00439e-05	0.00110525	0	0	1.81387	19.6217	RB1;CEP57;CDKN1A;USP37;CETN2;CCNF;CCP110;PPP2R2A;FOXM1;EPS8;PPP1CB;PPP6C;ACTR1A;PCM1;CDC23;TUBA1A;CCND2;CCND1;PPP2R1A;CDC27;ENSA;SKP2;PHLDA1;CEP290;POLE;SKP1;ACVR1;CEP135;PPP1R12A;TUBB;CSNK1E;DYNLL1;TUBG1;CDC25C;CKAP5;TUBA4A;HAUS2;CCNA2;CCNA1;MELK;LATS2;CCNY;CCNE1;AKAP9;CHMP4B;CEP63;MAPRE1;PLCB1;BCAT1;CACUL1;AJUBA;CHMP7;PAFAH1B1;SDCCAG8;KHDRBS1;ABCB1;CUL5;CUL3;CUL2;CAMK2A;DCTN3;CUL1;AURKA;CCNB2;C…
ribonucleoprotein complex biogenesis (GO:0022613)	34/60	2.07408e-05	0.00113299	0	0	3.00728	32.4287	LTV1;RPL5;NVL;RPL11;MRPL36;MALSU1;RPL7;RPS15;RPS17;EMG1;RPS16;XPO1;RPS19;TGS1;RPL14;HEATR3;RRP36;RPL38;GLUL;NOM1;NOP14;NPM1;RPS7;NOP16;RPS6;GTF3A;WDR74;RPS25;EBNA1BP2;RPS28;MRTO4;RPL26;RPL26L1;RPS24
nucleotide-excision repair, DNA damage recognition (GO:0000715)	17/23	2.12072e-05	0.00114635	0	0	6.50685	70.0213	CETN2;GPS1;XPA;COPS7B;COPS7A;RAD23B;DDB2;RBX1;COPS4;COPS3;COPS6;UBB;COPS2;UBC;COPS8;RPS27A;UBA52
SCF-dependent proteasomal ubiquitin-dependent protein catabolic process (GO:0031146)	46/89	2.13775e-05	0.00114635	0	0	2.46201	26.4744	PSMD10;PSMD12;PSMD11;CUL5;PSMD14;PSMD13;CCNF;CUL2;CUL1;PSMB10;PSMD8;FBXL20;PSMB6;PSMD9;PSMB7;PSMD6;PSMB4;PSMD7;PSMB5;PSMD4;PSMB2;PSMD5;PSMB3;PSMD3;PSMB1;SKP2;SKP1;FBXW5;FBXW7;FBXO39;FBXL17;FBXL14;PSMB8;RBX1;FBXL12;PSMB9;PSMA6;PSMC5;PSMA4;PSMC6;PSMA1;PSMA2;PSMC4;PSMC1;PSMC2;PSME1
import into nucleus (GO:0051170)	41/77	2.36571e-05	0.00125705	0	0	2.62024	27.9104	RPAIN;POM121;NUP107;NUP188;PPP1R10;PRICKLE1;PTTG1IP;NXT2;IPO7;PHB2;IPO4;IPO5;EIF4ENIF1;IPO8;SNRPD2;POM121C;SNRPD1;NUP85;TPR;FAM53B;HEATR3;NUP88;SNRPD3;SMN1;HNRNPA1;TNPO2;HTATIP2;SEC13;NUP155;RANBP17;STAT3;NUP153;NUP93;NUP50;GEMIN4;GEMIN5;SNRPE;GEMIN7;SNRPF;NUP62CL;SPRN
proteasomal protein catabolic process (GO:0010498)	90/205	2.77321e-05	0.00146031	0	0	1.80495	18.9392	GSK3A;UBXN2A;FAF1;CCDC47;ZFAND2B;ARRB2;PSMD8;PSMD9;PSMD6;UCHL1;PSMD7;PSMD4;PSMD5;TRIM2;DDI2;PSMD3;TRIM3;SKP2;FBXW5;FBXW7;UBE4B;SIRT1;RAD23B;SIRT2;RBX1;RNF41;PSMA6;RNF126;PSMA4;PSMA1;PSMA2;TBL1XR1;PSME1;PELI1;PLAA;RBCK1;RNF122;PSMD10;PSMD12;VCP;PSMD11;PSMD14;PSMD13;CUL3;SEL1L;DERL1;AGAP3;RNF4;RNF5;PSMB10;PCNP;PSMB6;PSMB7;PSMB4;PSMB5;RMND5A;PSMB2;PSMB3;HECTD3;PCBP2;PSMB1;SPOP;ZSWIM8;FEM1C;SMURF2;UB…
regulation of hematopoietic progenitor cell differentiation (GO:1901532)	40/75	2.8181e-05	0.0014707	0	0	2.62912	27.5449	PSMD10;PSMD12;PSMD11;PSMD14;PRKDC;PSMD13;PSMB10;PSMD8;PSMB6;PSMD9;PSMB7;PSMD6;PSMB4;PSMD7;PSMB5;PSMD4;PSMB2;PSMD5;PSMB3;PSMD3;PSMB1;YTHDF2;LMO2;METTL3;EIF2AK2;PSMB8;PSMB9;PSMA6;ITCH;PSMC5;PSMA4;PSMC6;PSMA1;PSMA2;TAL1;PSMC4;PSMC1;PSMC2;PSME1;TCF3
regulation of ATP metabolic process (GO:1903578)	32/56	2.86796e-05	0.00148347	0	0	3.06567	32.0649	NUP205;POM121;NUP107;SEH1L;NUP188;PRKAG1;COX7A2;SLC2A6;COX7A1;HIF1A;NUP160;POM121C;NUP85;TPR;EP300;NUP88;RAE1;RANBP2;SEC13;NUP155;SPHK2;UQCC2;NUP153;JMJD8;NUP93;COX7A2L;EIF6;NUP50;NUP35;NUP54;NUP98;NUP37
positive regulation of programmed cell death (GO:0043068)	119/286	3.33112e-05	0.00170793	0	0	1.64521	16.9615	FOXA1;MTCH2;TRIO;CLU;TNF;CCAR2;IFIT2;PYCARD;PREX1;FAM162A;ARL6IP5;TNFSF10;PHLDA1;PHLDA3;TGM2;RPS6;TIAM2;MELK;OBSCN;UBA52;SQSTM1;RNF122;PPID;ATF4;DCUN1D3;HTRA2;BCL10;PSEN1;KNG1;STK3;APH1A;ABR;APH1B;SCIN;UBB;UBD;UBC;BMF;RIPK1;FADD;MARK4;ZNF268;IP6K2;MOAP1;JUN;GADD45B;GADD45A;TNFRSF10C;GADD45G;MLLT11;BMP4;BMP2;BCL6;JMY;NF1;ATM;TOP2A;ITGB1;DDX3X;FAF1;RASGRF2;CASP9;AKAP13;FLCN;ING3;TCTN3;C1QBP;CASP3;A…
regulation of establishment of planar polarity (GO:0090175)	45/88	3.6959e-05	0.00187783	0	0	2.40809	24.5762	PSMD10;PSMD12;PSMD11;PSMD14;PSMD13;CLTC;ARRB2;PRICKLE1;PSMB10;PSMD8;CDC42;PSMB6;PSMD9;PSMB7;PSMD6;PSMB4;PSMD7;PSMB5;PSMD4;PSMB2;PSMD5;PSMB3;PSMD3;PSMB1;NPHP3;RAC1;DACT1;SMURF2;ARHGEF19;AP2B1;RHOA;PSMB8;PSMB9;PSMA6;PSMC5;PSMA4;PSMC6;DAAM1;PSMA1;PSMA2;PSMC4;PSMC1;PSMC2;PSME1;PFN1
secondary alcohol biosynthetic process (GO:1902653)	22/34	3.72674e-05	0.00187783	0	0	4.21197	42.9511	IDI1;FDPS;G6PD;ACAA2;MVK;INSIG2;INSIG1;MSMO1;APOA4;DHCR24;HMGCR;HSD17B7;APOA5;LSS;ACAT2;SQLE;EBP;PMVK;MVD;DHCR7;LBR;FDFT1
nucleic acid metabolic process (GO:0090304)	38/71	3.99856e-05	0.00199757	0	0	2.64854	26.8218	EXD2;FEN1;ANKLE1;HNRNPU;HNRNPR;DUSP11;NT5E;WRN;POLR2C;PCBP2;POLR2D;POLR2H;KPNA2;HNRNPA1;POLR2I;POLR2J;POLR2K;HNRNPA0;POLR2L;HNRNPA3;METTL3;WDR74;LSM1;SETMAR;LSM8;RAD50;HNRNPK;HNRNPH1;HNRNPF;HNRNPA2B1;HNRNPD;DNASE2;HNRNPH2;MMS19;HNRNPC;DNASE1L3;RBMX;DNASE1L1
protein localization to nucleus (GO:0034504)	52/106	4.16631e-05	0.00206374	0	0	2.21665	22.3569	RPAIN;NUP107;NUP188;PPP1R10;HNRNPU;NXT2;IPO7;PHB2;IPO4;IPO5;EIF4ENIF1;IPO8;FAM53B;TNPO2;BBS4;SKP1;MORC3;SEC13;NUP93;NUP50;NUP62CL;POM121;RPL11;XPA;TOR1AIP2;PTTG1IP;PRICKLE1;TOR1AIP1;WRN;POM121C;NUP85;TPR;LMNA;HEATR3;NUP88;GBP2;BANP;TOR1A;NUP155;PLK1;RANBP17;STAT3;CHCHD10;ABCA7;NUP153;TOR1B;PML;BMP4;MDM2;PAF1;TAF3;SPRN
positive regulation of cellular amide metabolic process (GO:0034250)	42/81	4.35031e-05	0.00213677	0	0	2.47755	24.8812	RPL5;GSK3A;DDX3X;PRKDC;ROCK2;FMR1;RPS27L;PLD1;CLU;ELAVL1;TNF;RELA;RBM3;RPS4X;FXR1;LRRTM3;CASP3;ABCA2;NPM1;YTHDF1;SPHK2;METTL3;PCIF1;SAMD4A;UPF3A;LARP4B;EEF2;LARP4;MTOR;TNFRSF1A;IFNG;EIF6;RPS6KB1;HNRNPD;PLXNB2;EIF3E;RPL26;VIM;EIF3C;ABCG1;NSMAF;PICALM
regulation of generation of precursor metabolites and energy (GO:0043467)	29/50	4.62306e-05	0.00225181	0	0	3.17427	31.6852	NUP205;POM121;NUP107;SEH1L;NUP188;PRKAG1;SLC2A6;HIF1A;NUP160;POM121C;NUP85;TPR;EP300;NUP88;RAE1;RANBP2;SEC13;NOS2;NUP155;NUP153;JMJD8;NUP93;EIF6;NOA1;NUP50;NUP35;NUP54;NUP98;NUP37
negative regulation of Wnt signaling pathway (GO:0030178)	84/191	4.67068e-05	0.00225621	0	0	1.80981	18.0468	LMBR1L;GSK3B;GSK3A;CHD8;CTNND1;PTPRO;JADE1;PSMD8;PSMD9;PSMD6;STK11;PSMD7;PSMD4;SOX17;PSMD5;TMEM88;MDK;PSMD3;CER1;SCYL2;ANKRD6;DACT1;TLE4;APC2;TLE3;TLE2;TLE1;IGFBP4;SOX13;DKK3;RBX1;GREM1;PSMA6;LATS2;PSMA4;PSMA1;SDHAF2;PSMA2;PSME1;TAX1BP3;PFDN5;MDFI;RBMS3;PSMD10;PSMD12;PSMD11;PSMD14;LRP1;PSMD13;HDAC1;NXN;CUL3;PRICKLE1;PSMB10;STK3;LRP6;PSMB6;SLC9A3R1;PSMB7;PSMB4;PSMB5;PSMB2;PSMB3;PSMB1;NPHP3;NKX2-5;…
proteasome assembly (GO:0043248)	10/11	5.31516e-05	0.00254648	0	0	22.9471	225.854	PSMD10;PSMD9;PSMD11;PSMD4;PSMD13;PSMD5;OTUD6B;ADRM1;POMP;PSMG2
protein transport (GO:0015031)	147/369	6.11068e-05	0.00290381	0	0	1.5299	14.8444	VPS29;SYS1;PDCD6;RAB3D;GCC2;CLU;RAB43;GOLGA4;ARL6IP5;TOM1;ARFIP2;ARFIP1;EIF2D;VPS35;ATP6V1E1;GOLGA7;SIL1;TBC1D22A;WLS;NSF;ATP6V1G1;ATP6V0E1;TICAM2;TANGO2;STX8;STX7;VPS33B;GOLPH3L;ANK3;SCAMP1;FAM91A1;SCAMP3;SCAMP2;RUFY1;RAB32;OLFM2;PREPL;ADPRH;ERP29;TXNIP;PREB;STX1A;ABCG1;CTAGE15;ATP6V1A;MACF1;UNC119B;NECAB3;CALCRL;LMAN2L;SAR1B;STXBP1;SEL1L;HSP90B1;SCFD1;SNX1;KIF3B;SCFD2;KIF3A;MYO6;TBC1D14;ATP6V0A…
protein localization to membrane (GO:0072657)	85/195	6.21902e-05	0.00293147	0	0	1.78132	17.2527	CD81;RAB3D;F11R;PIGW;ZDHHC2;TNF;ZDHHC3;IKBKB;EFR3A;ARL5B;TMEM88;SH3PXD2B;FLOT1;TMED2;FLOT2;RAB8A;RAB8B;SH3GLB1;TMEM150A;ANK2;EMP2;ANK3;FAM126B;ATP1B1;FAM126A;TNFRSF1A;RAB32;RABEP1;HGS;MYADM;PKP2;RAPGEF2;NUP54;RAPGEF6;SHANK3;RAMP2;RAMP3;ROCK1;ROCK2;STXBP1;NRXN2;THY1;LIN7C;PRAM1;TM9SF4;LRP6;SLC9A3R2;SLC9A3R1;RAP1A;PDZD11;TSPAN5;FLNA;SCN3B;BID;SPTBN1;S100A10;CLASP2;PPIL2;JUP;NUP155;KCNB1;RDX;DENND4C…
postreplication repair (GO:0006301)	27/46	6.30693e-05	0.00294912	0	0	3.26584	31.5848	VCP;PCNA;ZBTB1;UBE2L6;FAAP20;POLD4;UBB;POLD2;UBC;POLI;TRIM25;POLK;RPS27A;RFC5;RFC4;RFC1;UBE2B;NSMCE1;REV1;ISG15;UBE2A;WDR33;PARP10;RPA3;UBE2V1;UBA52;RAD18
[truncated: 5,720 more rows]
